# Supplementary material for: Multiple Myeloma Patient Tumors With High Levels of Cereblon Exon-10 Deletion Splice Variant Upregulate Clinically Targetable Pro-Inflammatory Cytokine Pathways
Source: Front Genet. 2022 Feb 9;13:831779. doi: 10.3389/fgene.2022.831779 (PMC8864318; doi:10.3389/fgene.2022.831779)
Supplement: Supplementary file 4 [file DataSheet1.xlsx]

## Sheet: Table S1
Supplementary Table 1. Functional enrichment of NDMM patients with CRBN del10 vs WT CRBN patients in MMRF cohort
NAME	GS<br> follow link to MSigDB	GS DETAILS	SIZE	ES	NES	NOM p-val	FDR q-val	FWER p-val	RANK AT MAX	LEADING EDGE
HALLMARK_TNFA_SIGNALING_VIA_NFKB	HALLMARK_TNFA_SIGNALING_VIA_NFKB	Details ...	197	0.654843	2.7942	0	0	0	5369	tags=60%, list=21%, signal=75%
HALLMARK_INTERFERON_GAMMA_RESPONSE	HALLMARK_INTERFERON_GAMMA_RESPONSE	Details ...	198	0.610488	2.57579	0	0	0	4700	tags=48%, list=18%, signal=58%
HALLMARK_INFLAMMATORY_RESPONSE	HALLMARK_INFLAMMATORY_RESPONSE	Details ...	191	0.565707	2.39679	0	0	0	5824	tags=48%, list=23%, signal=61%
REACTOME_INTERLEUKIN_10_SIGNALING	REACTOME_INTERLEUKIN_10_SIGNALING	Details ...	43	0.708702	2.39332	0	0	0	4709	tags=60%, list=18%, signal=74%
HALLMARK_INTERFERON_ALPHA_RESPONSE	HALLMARK_INTERFERON_ALPHA_RESPONSE	Details ...	95	0.609059	2.35853	0	0	0	5161	tags=52%, list=20%, signal=64%
REACTOME_CHEMOKINE_RECEPTORS_BIND_CHEMOKINES	REACTOME_CHEMOKINE_RECEPTORS_BIND_CHEMOKINES	Details ...	50	0.662056	2.30164	0	0	0	5455	tags=54%, list=21%, signal=68%
HALLMARK_IL6_JAK_STAT3_SIGNALING	HALLMARK_IL6_JAK_STAT3_SIGNALING	Details ...	84	0.587212	2.19975	0	0.000678071	0.005	5595	tags=49%, list=22%, signal=62%
REACTOME_CLASS_A_1_RHODOPSIN_LIKE_RECEPTORS	REACTOME_CLASS_A_1_RHODOPSIN_LIKE_RECEPTORS	Details ...	225	0.5035	2.16739	0	0.0013096	0.011	5824	tags=39%, list=23%, signal=50%
HINATA_NFKB_IMMU_INF	HINATA_NFKB_IMMU_INF	Details ...	15	0.824159	2.1618	0	0.0013734	0.013	3465	tags=80%, list=13%, signal=92%
REACTOME_SIGNALING_BY_CSF3_G_CSF	REACTOME_SIGNALING_BY_CSF3_G_CSF	Details ...	28	0.684215	2.1211	0	0.00248061	0.025	4959	tags=61%, list=19%, signal=75%
REACTOME_PEPTIDE_LIGAND_BINDING_RECEPTORS	REACTOME_PEPTIDE_LIGAND_BINDING_RECEPTORS	Details ...	134	0.513879	2.09717	0	0.00286254	0.032	5629	tags=37%, list=22%, signal=48%
REACTOME_INTERFERON_ALPHA_BETA_SIGNALING	REACTOME_INTERFERON_ALPHA_BETA_SIGNALING	Details ...	60	0.578932	2.08767	0	0.00294404	0.036	5010	tags=50%, list=19%, signal=62%
REACTOME_INTERLEUKIN_4_AND_INTERLEUKIN_13_SIGNALING	REACTOME_INTERLEUKIN_4_AND_INTERLEUKIN_13_SIGNALING	Details ...	105	0.533659	2.08746	0	0.00271757	0.036	7040	tags=46%, list=27%, signal=63%
KEGG_NOD_LIKE_RECEPTOR_SIGNALING_PATHWAY	KEGG_NOD_LIKE_RECEPTOR_SIGNALING_PATHWAY	Details ...	59	0.577554	2.08026	0	0.00272338	0.039	4154	tags=39%, list=16%, signal=46%
REACTOME_INACTIVATION_OF_CSF3_G_CSF_SIGNALING	REACTOME_INACTIVATION_OF_CSF3_G_CSF_SIGNALING	Details ...	23	0.691774	2.07283	0	0.00311677	0.047	4959	tags=57%, list=19%, signal=70%
REACTOME_CREATION_OF_C4_AND_C2_ACTIVATORS	REACTOME_CREATION_OF_C4_AND_C2_ACTIVATORS	Details ...	67	0.562099	2.07266	0	0.00292197	0.047	9388	tags=76%, list=37%, signal=120%
KEGG_CYTOKINE_CYTOKINE_RECEPTOR_INTERACTION	KEGG_CYTOKINE_CYTOKINE_RECEPTOR_INTERACTION	Details ...	214	0.48017	2.04551	0	0.00426757	0.068	6203	tags=40%, list=24%, signal=52%
REACTOME_FCGR_ACTIVATION	REACTOME_FCGR_ACTIVATION	Details ...	69	0.551351	2.03014	0	0.00483139	0.083	9388	tags=75%, list=37%, signal=118%
REACTOME_REGULATION_OF_RUNX3_EXPRESSION_AND_ACTIVITY	REACTOME_REGULATION_OF_RUNX3_EXPRESSION_AND_ACTIVITY	Details ...	54	0.568412	2.01555	0	0.00607815	0.11	4980	tags=54%, list=19%, signal=66%
KRAS.BREAST_UP.V1_UP	KRAS.BREAST_UP.V1_UP	Details ...	112	0.499268	2.00624	0	0.00696597	0.132	5637	tags=36%, list=22%, signal=46%
REACTOME_THE_ROLE_OF_GTSE1_IN_G2_M_PROGRESSION_AFTER_G2_CHECKPOINT	REACTOME_THE_ROLE_OF_GTSE1_IN_G2_M_PROGRESSION_AFTER_G2_CHECKPOINT		73	0.536581	1.99084	0	0.00772328	0.15	4980	tags=47%, list=19%, signal=58%
KEGG_RIG_I_LIKE_RECEPTOR_SIGNALING_PATHWAY	KEGG_RIG_I_LIKE_RECEPTOR_SIGNALING_PATHWAY		55	0.554962	1.9722	0	0.00992485	0.197	4571	tags=47%, list=18%, signal=57%
REACTOME_INTERLEUKIN_1_SIGNALING	REACTOME_INTERLEUKIN_1_SIGNALING		99	0.504422	1.95948	0	0.0116125	0.235	5805	tags=51%, list=23%, signal=65%
REACTOME_G1_S_DNA_DAMAGE_CHECKPOINTS	REACTOME_G1_S_DNA_DAMAGE_CHECKPOINTS		65	0.540138	1.95732	0	0.011443	0.24	6655	tags=57%, list=26%, signal=77%
STK33_UP	STK33_UP		264	0.446333	1.93947	0	0.0135848	0.296	5320	tags=41%, list=21%, signal=52%
REACTOME_SENSORY_PROCESSING_OF_SOUND	REACTOME_SENSORY_PROCESSING_OF_SOUND		66	0.526135	1.93667	0	0.0134639	0.305	3031	tags=27%, list=12%, signal=31%
REACTOME_SIGNALING_BY_INTERLEUKINS	REACTOME_SIGNALING_BY_INTERLEUKINS		420	0.425736	1.92171	0	0.0157512	0.359	6509	tags=42%, list=25%, signal=55%
REACTOME_NEGATIVE_REGULATION_OF_NOTCH4_SIGNALING	REACTOME_NEGATIVE_REGULATION_OF_NOTCH4_SIGNALING		53	0.544859	1.9209	0	0.0154627	0.362	4980	tags=53%, list=19%, signal=65%
REACTOME_SCF_SKP2_MEDIATED_DEGRADATION_OF_P27_P21	REACTOME_SCF_SKP2_MEDIATED_DEGRADATION_OF_P27_P21		59	0.543629	1.91743	0	0.0156214	0.371	5236	tags=51%, list=20%, signal=64%
KEGG_TOLL_LIKE_RECEPTOR_SIGNALING_PATHWAY	KEGG_TOLL_LIKE_RECEPTOR_SIGNALING_PATHWAY		89	0.50213	1.9166	0	0.0152587	0.376	5320	tags=38%, list=21%, signal=48%
KRAS.600.LUNG.BREAST_UP.V1_UP	KRAS.600.LUNG.BREAST_UP.V1_UP		229	0.446328	1.9157	0	0.0148594	0.378	5692	tags=31%, list=22%, signal=40%
KEGG_PROTEASOME	KEGG_PROTEASOME		42	0.576233	1.91569	0	0.0143951	0.378	6157	tags=67%, list=24%, signal=88%
BMI1_DN_MEL18_DN.V1_UP	BMI1_DN_MEL18_DN.V1_UP		133	0.474858	1.91179	0	0.0148245	0.396	6326	tags=41%, list=25%, signal=55%
REACTOME_INITIAL_TRIGGERING_OF_COMPLEMENT	REACTOME_INITIAL_TRIGGERING_OF_COMPLEMENT		75	0.507876	1.90554	0	0.0159042	0.434	9417	tags=73%, list=37%, signal=115%
REACTOME_SYNTHESIS_SECRETION_AND_DEACYLATION_OF_GHRELIN	REACTOME_SYNTHESIS_SECRETION_AND_DEACYLATION_OF_GHRELIN		16	0.706352	1.90036	0	0.0166788	0.463	1428	tags=19%, list=6%, signal=20%
STK33_NOMO_UP	STK33_NOMO_UP		273	0.430428	1.88339	0	0.0206888	0.549	4393	tags=33%, list=17%, signal=39%
REACTOME_METABOLISM_OF_POLYAMINES	REACTOME_METABOLISM_OF_POLYAMINES		57	0.519621	1.88133	0	0.0205963	0.555	4980	tags=47%, list=19%, signal=59%
REACTOME_ASYMMETRIC_LOCALIZATION_OF_PCP_PROTEINS	REACTOME_ASYMMETRIC_LOCALIZATION_OF_PCP_PROTEINS		62	0.519348	1.87837	0	0.0206067	0.568	4980	tags=48%, list=19%, signal=60%
REACTOME_INTERFERON_SIGNALING	REACTOME_INTERFERON_SIGNALING		184	0.441005	1.86186	0	0.0249463	0.658	4644	tags=32%, list=18%, signal=39%
REACTOME_INTERLEUKIN_1_FAMILY_SIGNALING	REACTOME_INTERLEUKIN_1_FAMILY_SIGNALING		133	0.46435	1.86061	0	0.0244896	0.661	6158	tags=48%, list=24%, signal=63%
AKT_UP.V1_UP	AKT_UP.V1_UP		148	0.45144	1.85706	0	0.0248684	0.676	4509	tags=27%, list=18%, signal=33%
REACTOME_STABILIZATION_OF_P53	REACTOME_STABILIZATION_OF_P53		54	0.53127	1.85648	0.00144718	0.024389	0.678	6655	tags=59%, list=26%, signal=80%
REACTOME_CROSS_PRESENTATION_OF_SOLUBLE_EXOGENOUS_ANTIGENS_ENDOSOMES	REACTOME_CROSS_PRESENTATION_OF_SOLUBLE_EXOGENOUS_ANTIGENS_ENDOSOMES		47	0.546743	1.85332	0.00146199	0.0246634	0.687	5688	tags=57%, list=22%, signal=74%
REACTOME_GPCR_LIGAND_BINDING	REACTOME_GPCR_LIGAND_BINDING		313	0.421109	1.85013	0	0.0248392	0.697	5678	tags=33%, list=22%, signal=42%
P53_DN.V2_UP	P53_DN.V2_UP		118	0.457062	1.83079	0	0.0305692	0.768	4815	tags=34%, list=19%, signal=42%
REACTOME_SCAVENGING_OF_HEME_FROM_PLASMA	REACTOME_SCAVENGING_OF_HEME_FROM_PLASMA		67	0.502621	1.82751	0.00138889	0.0310623	0.785	9735	tags=73%, list=38%, signal=117%
REACTOME_HEDGEHOG_LIGAND_BIOGENESIS	REACTOME_HEDGEHOG_LIGAND_BIOGENESIS		60	0.504388	1.82558	0.00280899	0.0309496	0.791	4980	tags=47%, list=19%, signal=58%
REACTOME_DECTIN_1_MEDIATED_NONCANONICAL_NF_KB_SIGNALING	REACTOME_DECTIN_1_MEDIATED_NONCANONICAL_NF_KB_SIGNALING		59	0.51141	1.8252	0.00142653	0.0304634	0.794	5652	tags=56%, list=22%, signal=72%
REACTOME_DDX58_IFIH1_MEDIATED_INDUCTION_OF_INTERFERON_ALPHA_BETA	REACTOME_DDX58_IFIH1_MEDIATED_INDUCTION_OF_INTERFERON_ALPHA_BETA		66	0.502641	1.82022	0	0.0313422	0.811	5489	tags=48%, list=21%, signal=61%
REACTOME_UB_SPECIFIC_PROCESSING_PROTEASES	REACTOME_UB_SPECIFIC_PROCESSING_PROTEASES		157	0.438423	1.8202	0	0.0307153	0.811	6662	tags=52%, list=26%, signal=69%
REACTOME_SIGNALING_BY_NOTCH4	REACTOME_SIGNALING_BY_NOTCH4		81	0.478334	1.81508	0.00134953	0.0318899	0.829	5143	tags=43%, list=20%, signal=54%
REACTOME_ACTIVATION_OF_IRF3_IRF7_MEDIATED_BY_TBK1_IKK_EPSILON	REACTOME_ACTIVATION_OF_IRF3_IRF7_MEDIATED_BY_TBK1_IKK_EPSILON		17	0.656266	1.80837	0.00168634	0.0336258	0.852	7108	tags=65%, list=28%, signal=89%
HALLMARK_APOPTOSIS	HALLMARK_APOPTOSIS		158	0.433578	1.80661	0	0.0336595	0.859	6505	tags=44%, list=25%, signal=59%
REACTOME_FCERI_MEDIATED_NF_KB_ACTIVATION	REACTOME_FCERI_MEDIATED_NF_KB_ACTIVATION		134	0.444097	1.80532	0	0.0334626	0.863	7321	tags=53%, list=28%, signal=74%
REACTOME_DEGRADATION_OF_AXIN	REACTOME_DEGRADATION_OF_AXIN		53	0.518736	1.79092	0.00140056	0.0381484	0.892	4994	tags=53%, list=19%, signal=65%
REACTOME_IL_6_TYPE_CYTOKINE_RECEPTOR_LIGAND_INTERACTIONS	REACTOME_IL_6_TYPE_CYTOKINE_RECEPTOR_LIGAND_INTERACTIONS		15	0.670137	1.78571	0.013468	0.039175	0.901	1812	tags=40%, list=7%, signal=43%
KRAS.LUNG.BREAST_UP.V1_UP	KRAS.LUNG.BREAST_UP.V1_UP		125	0.439247	1.78173	0	0.0403165	0.917	5692	tags=34%, list=22%, signal=43%
REACTOME_DEGRADATION_OF_DVL	REACTOME_DEGRADATION_OF_DVL		55	0.501085	1.77132	0.00429799	0.0444902	0.943	4980	tags=47%, list=19%, signal=59%
REACTOME_SYNTHESIS_SECRETION_AND_INACTIVATION_OF_GLUCAGON_LIKE_PEPTIDE_1_GLP_1	REACTOME_SYNTHESIS_SECRETION_AND_INACTIVATION_OF_GLUCAGON_LIKE_PEPTIDE_1_GLP_1		15	0.65868	1.76839	0.0084317	0.0449847	0.946	2	tags=7%, list=0%, signal=7%
RELA_DN.V1_DN	RELA_DN.V1_DN		109	0.446815	1.7678	0	0.0445057	0.946	6160	tags=34%, list=24%, signal=44%
REACTOME_SIGNALING_BY_BMP	REACTOME_SIGNALING_BY_BMP		24	0.586231	1.76496	0.01	0.0450942	0.948	1696	tags=29%, list=7%, signal=31%
REACTOME_REGULATION_OF_RUNX2_EXPRESSION_AND_ACTIVITY	REACTOME_REGULATION_OF_RUNX2_EXPRESSION_AND_ACTIVITY		69	0.481627	1.75676	0	0.0481753	0.962	5652	tags=51%, list=22%, signal=65%
KEGG_CHEMOKINE_SIGNALING_PATHWAY	KEGG_CHEMOKINE_SIGNALING_PATHWAY		169	0.415134	1.7489	0	0.0512553	0.974	5288	tags=30%, list=21%, signal=38%
LEF1_UP.V1_UP	LEF1_UP.V1_UP		172	0.416094	1.74734	0	0.0512766	0.975	6594	tags=35%, list=26%, signal=47%
REACTOME_BINDING_AND_UPTAKE_OF_LIGANDS_BY_SCAVENGER_RECEPTORS	REACTOME_BINDING_AND_UPTAKE_OF_LIGANDS_BY_SCAVENGER_RECEPTORS		95	0.449016	1.745	0.0026738	0.0516443	0.977	9735	tags=68%, list=38%, signal=110%
KRAS.KIDNEY_UP.V1_DN	KRAS.KIDNEY_UP.V1_DN		103	0.445417	1.73888	0	0.0541702	0.984	5479	tags=32%, list=21%, signal=41%
REACTOME_DEFECTIVE_CFTR_CAUSES_CYSTIC_FIBROSIS	REACTOME_DEFECTIVE_CFTR_CAUSES_CYSTIC_FIBROSIS		59	0.485548	1.73364	0.0069541	0.0558803	0.987	4980	tags=46%, list=19%, signal=57%
REACTOME_AUF1_HNRNP_D0_BINDS_AND_DESTABILIZES_MRNA	REACTOME_AUF1_HNRNP_D0_BINDS_AND_DESTABILIZES_MRNA		53	0.494357	1.73155	0.0058309	0.056224	0.987	4980	tags=49%, list=19%, signal=61%
REACTOME_TNFR2_NON_CANONICAL_NF_KB_PATHWAY	REACTOME_TNFR2_NON_CANONICAL_NF_KB_PATHWAY		96	0.444505	1.72986	0	0.0561846	0.987	6443	tags=49%, list=25%, signal=65%
REACTOME_INCRETIN_SYNTHESIS_SECRETION_AND_INACTIVATION	REACTOME_INCRETIN_SYNTHESIS_SECRETION_AND_INACTIVATION		16	0.640497	1.72893	0.00821018	0.0558569	0.987	2	tags=6%, list=0%, signal=6%
VEGF_A_UP.V1_UP	VEGF_A_UP.V1_UP		172	0.410376	1.72813	0.00118906	0.0555557	0.987	5870	tags=30%, list=23%, signal=39%
HALLMARK_ALLOGRAFT_REJECTION	HALLMARK_ALLOGRAFT_REJECTION		185	0.409777	1.72221	0	0.0581236	0.989	6662	tags=35%, list=26%, signal=46%
REACTOME_TAK1_ACTIVATES_NFKB_BY_PHOSPHORYLATION_AND_ACTIVATION_OF_IKKS_COMPLEX	REACTOME_TAK1_ACTIVATES_NFKB_BY_PHOSPHORYLATION_AND_ACTIVATION_OF_IKKS_COMPLEX		31	0.54999	1.72202	0.00776398	0.0574442	0.989	5805	tags=48%, list=23%, signal=62%
REACTOME_RUNX1_REGULATES_TRANSCRIPTION_OF_GENES_INVOLVED_IN_DIFFERENTIATION_OF_HSCS	REACTOME_RUNX1_REGULATES_TRANSCRIPTION_OF_GENES_INVOLVED_IN_DIFFERENTIATION_OF_HSCS		67	0.468644	1.72141	0.0013947	0.0569916	0.99	4980	tags=45%, list=19%, signal=55%
REACTOME_DEUBIQUITINATION	REACTOME_DEUBIQUITINATION		230	0.401298	1.71783	0	0.0582951	0.99	6662	tags=47%, list=26%, signal=63%
LTE2_UP.V1_DN	LTE2_UP.V1_DN		183	0.406736	1.70429	0	0.0653422	0.994	4566	tags=32%, list=18%, signal=39%
REACTOME_INTERFERON_GAMMA_SIGNALING	REACTOME_INTERFERON_GAMMA_SIGNALING		89	0.447745	1.70385	0.00258732	0.0647538	0.994	4792	tags=31%, list=19%, signal=39%
REACTOME_HEDGEHOG_ON_STATE	REACTOME_HEDGEHOG_ON_STATE		81	0.4534	1.70127	0	0.0655016	0.994	4980	tags=37%, list=19%, signal=46%
KEGG_GRAFT_VERSUS_HOST_DISEASE	KEGG_GRAFT_VERSUS_HOST_DISEASE		36	0.526625	1.69909	0.0159884	0.0661105	0.994	7449	tags=53%, list=29%, signal=74%
REACTOME_NUCLEOTIDE_BINDING_DOMAIN_LEUCINE_RICH_REPEAT_CONTAINING_RECEPTOR_NLR_SIGNALING_PATHWAYS	REACTOME_NUCLEOTIDE_BINDING_DOMAIN_LEUCINE_RICH_REPEAT_CONTAINING_RECEPTOR_NLR_SIGNALING_PATHWAYS		56	0.48084	1.69898	0.00712251	0.0653561	0.994	5493	tags=38%, list=21%, signal=48%
HALLMARK_IL2_STAT5_SIGNALING	HALLMARK_IL2_STAT5_SIGNALING		192	0.405137	1.69613	0	0.066409	0.996	5860	tags=36%, list=23%, signal=46%
REACTOME_TRANSCRIPTIONAL_REGULATION_BY_RUNX2	REACTOME_TRANSCRIPTIONAL_REGULATION_BY_RUNX2		112	0.431568	1.69515	0.00505689	0.066271	0.996	6196	tags=45%, list=24%, signal=59%
AKT_UP_MTOR_DN.V1_UP	AKT_UP_MTOR_DN.V1_UP		160	0.406621	1.69129	0.00120048	0.0680188	0.996	6121	tags=34%, list=24%, signal=45%
REACTOME_APC_C_CDH1_MEDIATED_DEGRADATION_OF_CDC20_AND_OTHER_APC_C_CDH1_TARGETED_PROTEINS_IN_LATE_MITOSIS_EARLY_G1	REACTOME_APC_C_CDH1_MEDIATED_DEGRADATION_OF_CDC20_AND_OTHER_APC_C_CDH1_TARGETED_PROTEINS_IN_LATE_MITOSIS_EARLY_G1		72	0.453212	1.68891	0.00409277	0.0686931	0.997	5439	tags=46%, list=21%, signal=58%
REACTOME_P75NTR_SIGNALS_VIA_NF_KB	REACTOME_P75NTR_SIGNALS_VIA_NF_KB		15	0.627324	1.68785	0.0183946	0.0685575	0.997	6905	tags=67%, list=27%, signal=91%
REACTOME_TOLL_LIKE_RECEPTOR_CASCADES	REACTOME_TOLL_LIKE_RECEPTOR_CASCADES		149	0.408172	1.68352	0	0.0702317	0.997	6505	tags=46%, list=25%, signal=61%
REACTOME_INTERACTION_BETWEEN_L1_AND_ANKYRINS	REACTOME_INTERACTION_BETWEEN_L1_AND_ANKYRINS		28	0.552076	1.68172	0.0125196	0.0704773	0.998	2288	tags=25%, list=9%, signal=27%
REACTOME_ZBP1_DAI_MEDIATED_INDUCTION_OF_TYPE_I_IFNS	REACTOME_ZBP1_DAI_MEDIATED_INDUCTION_OF_TYPE_I_IFNS		21	0.589921	1.67939	0.0192926	0.0711638	0.999	1014	tags=38%, list=4%, signal=40%
REACTOME_CYCLIN_A_CDK2_ASSOCIATED_EVENTS_AT_S_PHASE_ENTRY	REACTOME_CYCLIN_A_CDK2_ASSOCIATED_EVENTS_AT_S_PHASE_ENTRY		84	0.438048	1.67658	0.0039267	0.0721102	0.999	5288	tags=43%, list=21%, signal=54%
KEGG_ASTHMA	KEGG_ASTHMA		23	0.570806	1.67223	0.0170015	0.0739212	0.999	7251	tags=57%, list=28%, signal=79%
REACTOME_PURINERGIC_SIGNALING_IN_LEISHMANIASIS_INFECTION	REACTOME_PURINERGIC_SIGNALING_IN_LEISHMANIASIS_INFECTION		26	0.552057	1.66768	0.0123077	0.0758052	0.999	5824	tags=46%, list=23%, signal=60%
REACTOME_CD22_MEDIATED_BCR_REGULATION	REACTOME_CD22_MEDIATED_BCR_REGULATION		61	0.465067	1.6666	0.0108401	0.0758002	0.999	9388	tags=75%, list=37%, signal=119%
REACTOME_CELLULAR_RESPONSE_TO_HYPOXIA	REACTOME_CELLULAR_RESPONSE_TO_HYPOXIA		69	0.450984	1.664	0.00426743	0.0767833	0.999	4980	tags=43%, list=19%, signal=54%
CSR_EARLY_UP.V1_UP	CSR_EARLY_UP.V1_UP		144	0.406654	1.65999	0	0.0787452	1	6096	tags=42%, list=24%, signal=54%
STK33_SKM_UP	STK33_SKM_UP		247	0.384322	1.65751	0	0.0795762	1	5655	tags=38%, list=22%, signal=49%
REACTOME_CLEC7A_DECTIN_1_SIGNALING	REACTOME_CLEC7A_DECTIN_1_SIGNALING		97	0.422846	1.65741	0.0025641	0.0788466	1	5652	tags=47%, list=22%, signal=61%
REACTOME_IMMUNOREGULATORY_INTERACTIONS_BETWEEN_A_LYMPHOID_AND_A_NON_LYMPHOID_CELL	REACTOME_IMMUNOREGULATORY_INTERACTIONS_BETWEEN_A_LYMPHOID_AND_A_NON_LYMPHOID_CELL		176	0.397951	1.65648	0	0.0786121	1	9388	tags=58%, list=37%, signal=91%
REACTOME_DOWNSTREAM_SIGNALING_EVENTS_OF_B_CELL_RECEPTOR_BCR	REACTOME_DOWNSTREAM_SIGNALING_EVENTS_OF_B_CELL_RECEPTOR_BCR		79	0.44288	1.65622	0.00544218	0.077937	1	4980	tags=47%, list=19%, signal=58%
TBK1.DF_UP	TBK1.DF_UP		271	0.37802	1.6561	0	0.0772362	1	4507	tags=29%, list=18%, signal=35%
REACTOME_DEGRADATION_OF_GLI1_BY_THE_PROTEASOME	REACTOME_DEGRADATION_OF_GLI1_BY_THE_PROTEASOME		57	0.467311	1.65593	0.00418994	0.0765211	1	5652	tags=49%, list=22%, signal=63%
KEGG_INTESTINAL_IMMUNE_NETWORK_FOR_IGA_PRODUCTION	KEGG_INTESTINAL_IMMUNE_NETWORK_FOR_IGA_PRODUCTION		41	0.502683	1.64481	0.0104167	0.0832009	1	4331	tags=32%, list=17%, signal=38%
REACTOME_PCP_CE_PATHWAY	REACTOME_PCP_CE_PATHWAY		90	0.428204	1.64394	0.0013245	0.082965	1	4980	tags=34%, list=19%, signal=43%
REACTOME_ACTIVATED_TAK1_MEDIATES_P38_MAPK_ACTIVATION	REACTOME_ACTIVATED_TAK1_MEDIATES_P38_MAPK_ACTIVATION		23	0.546549	1.63658	0.0178282	0.0876729	1	4534	tags=35%, list=18%, signal=42%
REACTOME_MAPK6_MAPK4_SIGNALING	REACTOME_MAPK6_MAPK4_SIGNALING		86	0.425777	1.63203	0.00134228	0.0903107	1	4980	tags=38%, list=19%, signal=47%
REACTOME_ION_HOMEOSTASIS	REACTOME_ION_HOMEOSTASIS		48	0.466595	1.63132	0.00883652	0.0899423	1	3957	tags=35%, list=15%, signal=42%
KEGG_LEISHMANIA_INFECTION	KEGG_LEISHMANIA_INFECTION		69	0.4487	1.62848	0.00966851	0.0912999	1	4513	tags=32%, list=18%, signal=39%
REACTOME_TRANSCRIPTIONAL_REGULATION_BY_RUNX3	REACTOME_TRANSCRIPTIONAL_REGULATION_BY_RUNX3		94	0.422226	1.6278	0.00399467	0.0910531	1	4980	tags=37%, list=19%, signal=46%
REACTOME_OVARIAN_TUMOR_DOMAIN_PROTEASES	REACTOME_OVARIAN_TUMOR_DOMAIN_PROTEASES		38	0.495971	1.62597	0.0196375	0.0916221	1	4874	tags=42%, list=19%, signal=52%
REACTOME_ABC_TRANSPORTER_DISORDERS	REACTOME_ABC_TRANSPORTER_DISORDERS		75	0.442085	1.62467	0.00650195	0.091682	1	4980	tags=40%, list=19%, signal=49%
TGFB_UP.V1_DN	TGFB_UP.V1_DN		172	0.388838	1.62326	0	0.0920105	1	3682	tags=26%, list=14%, signal=30%
KRAS.600_UP.V1_UP	KRAS.600_UP.V1_UP		240	0.374403	1.61571	0	0.0971252	1	5762	tags=30%, list=22%, signal=38%
REACTOME_ASSEMBLY_OF_THE_PRE_REPLICATIVE_COMPLEX	REACTOME_ASSEMBLY_OF_THE_PRE_REPLICATIVE_COMPLEX		66	0.440581	1.61551	0.010989	0.0964373	1	5439	tags=44%, list=21%, signal=56%
KRAS.50_UP.V1_UP	KRAS.50_UP.V1_UP		44	0.471115	1.61362	0.0204082	0.0970335	1	4777	tags=34%, list=19%, signal=42%
ESC_V6.5_UP_EARLY.V1_DN	ESC_V6.5_UP_EARLY.V1_DN		138	0.391325	1.61077	0.00248447	0.098192	1	6958	tags=36%, list=27%, signal=48%
KRAS.PROSTATE_UP.V1_UP	KRAS.PROSTATE_UP.V1_UP		109	0.408674	1.60623	0.00380228	0.101532	1	4549	tags=28%, list=18%, signal=34%
REACTOME_THE_NLRP3_INFLAMMASOME	REACTOME_THE_NLRP3_INFLAMMASOME		16	0.602197	1.59747	0.0353535	0.107955	1	5489	tags=56%, list=21%, signal=71%
REACTOME_DEGRADATION_OF_BETA_CATENIN_BY_THE_DESTRUCTION_COMPLEX	REACTOME_DEGRADATION_OF_BETA_CATENIN_BY_THE_DESTRUCTION_COMPLEX		82	0.427762	1.59652	0.00270636	0.107929	1	6146	tags=48%, list=24%, signal=62%
KEGG_TYPE_I_DIABETES_MELLITUS	KEGG_TYPE_I_DIABETES_MELLITUS		37	0.482503	1.5948	0.0144092	0.108584	1	7699	tags=49%, list=30%, signal=69%
KRAS.PROSTATE_UP.V1_DN	KRAS.PROSTATE_UP.V1_DN		104	0.410813	1.59479	0.00762389	0.107671	1	4642	tags=28%, list=18%, signal=34%
REACTOME_MAPK_FAMILY_SIGNALING_CASCADES	REACTOME_MAPK_FAMILY_SIGNALING_CASCADES		300	0.361096	1.59408	0	0.107409	1	6443	tags=36%, list=25%, signal=47%
HALLMARK_COMPLEMENT	HALLMARK_COMPLEMENT		189	0.38162	1.59392	0.00119474	0.106655	1	5405	tags=31%, list=21%, signal=39%
PTEN_DN.V1_UP	PTEN_DN.V1_UP		137	0.392291	1.59234	0.00492611	0.107119	1	5075	tags=26%, list=20%, signal=33%
REACTOME_COMPLEMENT_CASCADE	REACTOME_COMPLEMENT_CASCADE		102	0.408925	1.58923	0.00520833	0.10869	1	9417	tags=62%, list=37%, signal=97%
REACTOME_ACTIVATION_OF_BH3_ONLY_PROTEINS	REACTOME_ACTIVATION_OF_BH3_ONLY_PROTEINS		30	0.50531	1.58714	0.0206022	0.109761	1	5288	tags=47%, list=21%, signal=59%
MTOR_UP.V1_UP	MTOR_UP.V1_UP		148	0.387586	1.58688	0.00119474	0.109052	1	4824	tags=28%, list=19%, signal=35%
WNT_UP.V1_DN	WNT_UP.V1_DN		143	0.391426	1.58678	0.00494438	0.108301	1	7119	tags=45%, list=28%, signal=63%
REACTOME_RAS_PROCESSING	REACTOME_RAS_PROCESSING		23	0.530994	1.58346	0.0359937	0.110344	1	7433	tags=57%, list=29%, signal=79%
REACTOME_INTERLEUKIN_12_FAMILY_SIGNALING	REACTOME_INTERLEUKIN_12_FAMILY_SIGNALING		56	0.449163	1.58084	0.0154278	0.111789	1	6502	tags=45%, list=25%, signal=60%
KEGG_AUTOIMMUNE_THYROID_DISEASE	KEGG_AUTOIMMUNE_THYROID_DISEASE		33	0.494787	1.58009	0.0318182	0.111581	1	7449	tags=45%, list=29%, signal=64%
REACTOME_REGULATION_OF_MRNA_STABILITY_BY_PROTEINS_THAT_BIND_AU_RICH_ELEMENTS	REACTOME_REGULATION_OF_MRNA_STABILITY_BY_PROTEINS_THAT_BIND_AU_RICH_ELEMENTS		85	0.416048	1.57934	0.010596	0.111361	1	5439	tags=44%, list=21%, signal=55%
REACTOME_SWITCHING_OF_ORIGINS_TO_A_POST_REPLICATIVE_STATE	REACTOME_SWITCHING_OF_ORIGINS_TO_A_POST_REPLICATIVE_STATE		89	0.414074	1.5771	0.00656168	0.112537	1	5652	tags=42%, list=22%, signal=53%
RAF_UP.V1_UP	RAF_UP.V1_UP		178	0.372406	1.57273	0	0.115502	1	6639	tags=40%, list=26%, signal=53%
HALLMARK_HYPOXIA	HALLMARK_HYPOXIA		184	0.377932	1.5713	0.00238379	0.115978	1	5416	tags=33%, list=21%, signal=42%
ESC_J1_UP_EARLY.V1_DN	ESC_J1_UP_EARLY.V1_DN		151	0.380691	1.5681	0.00246002	0.118226	1	4644	tags=28%, list=18%, signal=34%
ALK_DN.V1_UP	ALK_DN.V1_UP		118	0.397294	1.56283	0.00608273	0.122245	1	3733	tags=19%, list=15%, signal=22%
REACTOME_ANTIVIRAL_MECHANISM_BY_IFN_STIMULATED_GENES	REACTOME_ANTIVIRAL_MECHANISM_BY_IFN_STIMULATED_GENES		80	0.411873	1.56271	0.00834492	0.121458	1	3968	tags=30%, list=15%, signal=35%
EGFR_UP.V1_UP	EGFR_UP.V1_UP		177	0.370222	1.56205	0.00238379	0.121086	1	5550	tags=32%, list=22%, signal=41%
REACTOME_REGULATION_OF_RAS_BY_GAPS	REACTOME_REGULATION_OF_RAS_BY_GAPS		66	0.421909	1.56135	0.00985915	0.120832	1	6443	tags=50%, list=25%, signal=67%
REACTOME_UCH_PROTEINASES	REACTOME_UCH_PROTEINASES		83	0.415503	1.55917	0.00929615	0.121904	1	4980	tags=40%, list=19%, signal=49%
HALLMARK_UV_RESPONSE_UP	HALLMARK_UV_RESPONSE_UP		153	0.378022	1.55875	0.00242718	0.12147	1	4488	tags=29%, list=17%, signal=35%
KRAS.300_UP.V1_UP	KRAS.300_UP.V1_UP		129	0.386886	1.55663	0.00501882	0.12276	1	4777	tags=26%, list=19%, signal=31%
REACTOME_G_ALPHA_I_SIGNALLING_EVENTS	REACTOME_G_ALPHA_I_SIGNALLING_EVENTS		237	0.364593	1.55355	0.00114548	0.124998	1	5629	tags=31%, list=22%, signal=40%
REACTOME_ROLE_OF_LAT2_NTAL_LAB_ON_CALCIUM_MOBILIZATION	REACTOME_ROLE_OF_LAT2_NTAL_LAB_ON_CALCIUM_MOBILIZATION		71	0.418242	1.55328	0.0182841	0.124391	1	9388	tags=72%, list=37%, signal=113%
REACTOME_ORC1_REMOVAL_FROM_CHROMATIN	REACTOME_ORC1_REMOVAL_FROM_CHROMATIN		69	0.416587	1.55023	0.0165975	0.126367	1	5652	tags=43%, list=22%, signal=56%
KEGG_JAK_STAT_SIGNALING_PATHWAY	KEGG_JAK_STAT_SIGNALING_PATHWAY		122	0.385835	1.54953	0.00621891	0.126115	1	6214	tags=38%, list=24%, signal=49%
REACTOME_SENSORY_PERCEPTION	REACTOME_SENSORY_PERCEPTION		169	0.371925	1.54946	0.00118624	0.125303	1	3031	tags=18%, list=12%, signal=20%
REACTOME_C_TYPE_LECTIN_RECEPTORS_CLRS	REACTOME_C_TYPE_LECTIN_RECEPTORS_CLRS		133	0.378841	1.54626	0.00493218	0.127477	1	6505	tags=46%, list=25%, signal=61%
KRAS.50_UP.V1_DN	KRAS.50_UP.V1_DN		31	0.48563	1.54623	0.0304976	0.126655	1	2545	tags=23%, list=10%, signal=25%
REACTOME_DNA_REPLICATION_PRE_INITIATION	REACTOME_DNA_REPLICATION_PRE_INITIATION		83	0.410373	1.54556	0.0105541	0.126529	1	5134	tags=37%, list=20%, signal=47%
REACTOME_MYD88_INDEPENDENT_TLR4_CASCADE	REACTOME_MYD88_INDEPENDENT_TLR4_CASCADE		96	0.39449	1.54232	0.0101394	0.128943	1	5805	tags=41%, list=23%, signal=52%
KEGG_CYTOSOLIC_DNA_SENSING_PATHWAY	KEGG_CYTOSOLIC_DNA_SENSING_PATHWAY		41	0.464751	1.54012	0.028777	0.130277	1	1627	tags=27%, list=6%, signal=29%
REACTOME_PI_3K_CASCADE_FGFR2	REACTOME_PI_3K_CASCADE_FGFR2		17	0.551327	1.53887	0.0529801	0.130689	1	6066	tags=41%, list=24%, signal=54%
REACTOME_JNK_C_JUN_KINASES_PHOSPHORYLATION_AND_ACTIVATION_MEDIATED_BY_ACTIVATED_HUMAN_TAK1	REACTOME_JNK_C_JUN_KINASES_PHOSPHORYLATION_AND_ACTIVATION_MEDIATED_BY_ACTIVATED_HUMAN_TAK1		22	0.522709	1.5338	0.0410742	0.134646	1	4154	tags=32%, list=16%, signal=38%
REACTOME_TRAF6_MEDIATED_INDUCTION_OF_TAK1_COMPLEX_WITHIN_TLR4_COMPLEX	REACTOME_TRAF6_MEDIATED_INDUCTION_OF_TAK1_COMPLEX_WITHIN_TLR4_COMPLEX		16	0.561969	1.53007	0.0535117	0.137343	1	7108	tags=50%, list=28%, signal=69%
RPS14_DN.V1_UP	RPS14_DN.V1_UP		179	0.365405	1.52863	0	0.13786	1	7462	tags=37%, list=29%, signal=52%
HALLMARK_KRAS_SIGNALING_UP	HALLMARK_KRAS_SIGNALING_UP		182	0.367386	1.52843	0.00350058	0.137154	1	5866	tags=33%, list=23%, signal=42%
REACTOME_TCR_SIGNALING	REACTOME_TCR_SIGNALING		115	0.37925	1.52643	0.0166453	0.138437	1	5652	tags=41%, list=22%, signal=52%
KEGG_ALLOGRAFT_REJECTION	KEGG_ALLOGRAFT_REJECTION		32	0.48561	1.52595	0.0304348	0.138092	1	7699	tags=50%, list=30%, signal=71%
REACTOME_SENESCENCE_ASSOCIATED_SECRETORY_PHENOTYPE_SASP	REACTOME_SENESCENCE_ASSOCIATED_SECRETORY_PHENOTYPE_SASP		52	0.434611	1.52158	0.0158046	0.141834	1	3120	tags=27%, list=12%, signal=31%
REACTOME_INFLAMMASOMES	REACTOME_INFLAMMASOMES		21	0.534626	1.52144	0.0434783	0.141073	1	5857	tags=52%, list=23%, signal=68%
REACTOME_IKK_COMPLEX_RECRUITMENT_MEDIATED_BY_RIP1	REACTOME_IKK_COMPLEX_RECRUITMENT_MEDIATED_BY_RIP1		23	0.512717	1.51672	0.05	0.145274	1	5493	tags=48%, list=21%, signal=61%
KRAS.LUNG_UP.V1_UP	KRAS.LUNG_UP.V1_UP		113	0.38346	1.51514	0.0102171	0.146109	1	5396	tags=29%, list=21%, signal=37%
REACTOME_TRAF6_MEDIATED_NF_KB_ACTIVATION	REACTOME_TRAF6_MEDIATED_NF_KB_ACTIVATION		23	0.521684	1.51303	0.0433437	0.147445	1	5805	tags=61%, list=23%, signal=79%
HALLMARK_PANCREAS_BETA_CELLS	HALLMARK_PANCREAS_BETA_CELLS		25	0.508771	1.51179	0.0354267	0.147986	1	2	tags=4%, list=0%, signal=4%
BMI1_DN.V1_UP	BMI1_DN.V1_UP		133	0.373315	1.51004	0.00992556	0.149214	1	7188	tags=40%, list=28%, signal=55%
REACTOME_INTERLEUKIN_6_FAMILY_SIGNALING	REACTOME_INTERLEUKIN_6_FAMILY_SIGNALING		22	0.525526	1.51002	0.0506135	0.148333	1	5533	tags=50%, list=22%, signal=64%
REACTOME_NEGATIVE_REGULATORS_OF_DDX58_IFIH1_SIGNALING	REACTOME_NEGATIVE_REGULATORS_OF_DDX58_IFIH1_SIGNALING		34	0.47029	1.50959	0.0390977	0.147925	1	4959	tags=41%, list=19%, signal=51%
KEGG_NEUROTROPHIN_SIGNALING_PATHWAY	KEGG_NEUROTROPHIN_SIGNALING_PATHWAY		123	0.371619	1.50554	0.0135301	0.151429	1	2930	tags=23%, list=11%, signal=26%
REACTOME_MUSCLE_CONTRACTION	REACTOME_MUSCLE_CONTRACTION		167	0.35716	1.49606	0.00357995	0.161623	1	4321	tags=27%, list=17%, signal=32%
REACTOME_RIP_MEDIATED_NFKB_ACTIVATION_VIA_ZBP1	REACTOME_RIP_MEDIATED_NFKB_ACTIVATION_VIA_ZBP1		17	0.543419	1.49578	0.0561983	0.161025	1	6129	tags=71%, list=24%, signal=93%
REACTOME_CARDIAC_CONDUCTION	REACTOME_CARDIAC_CONDUCTION		108	0.377145	1.49024	0.0164975	0.166474	1	4177	tags=29%, list=16%, signal=34%
REACTOME_APOPTOSIS	REACTOME_APOPTOSIS		168	0.357579	1.48947	0.00600962	0.166427	1	5288	tags=35%, list=21%, signal=43%
REACTOME_G2_M_CHECKPOINTS	REACTOME_G2_M_CHECKPOINTS		128	0.369127	1.48678	0.0102564	0.168803	1	4980	tags=34%, list=19%, signal=42%
HALLMARK_KRAS_SIGNALING_DN	HALLMARK_KRAS_SIGNALING_DN		144	0.364437	1.48527	0.0108959	0.169694	1	5486	tags=27%, list=21%, signal=34%
REACTOME_RHO_GTPASES_ACTIVATE_ROCKS	REACTOME_RHO_GTPASES_ACTIVATE_ROCKS		19	0.531772	1.48421	0.0433333	0.169863	1	4321	tags=42%, list=17%, signal=51%
REACTOME_ANTIGEN_PROCESSING_CROSS_PRESENTATION	REACTOME_ANTIGEN_PROCESSING_CROSS_PRESENTATION		100	0.380657	1.4819	0.0140665	0.171831	1	6162	tags=43%, list=24%, signal=56%
SRC_UP.V1_UP	SRC_UP.V1_UP		136	0.365636	1.48146	0.0075662	0.171355	1	3519	tags=21%, list=14%, signal=25%
KEGG_HEMATOPOIETIC_CELL_LINEAGE	KEGG_HEMATOPOIETIC_CELL_LINEAGE		78	0.389399	1.48055	0.021419	0.171641	1	8525	tags=47%, list=33%, signal=71%
REACTOME_STRIATED_MUSCLE_CONTRACTION	REACTOME_STRIATED_MUSCLE_CONTRACTION		31	0.463783	1.4787	0.0455927	0.173062	1	5518	tags=42%, list=21%, signal=53%
ERBB2_UP.V1_DN	ERBB2_UP.V1_DN		185	0.349494	1.47329	0.00365408	0.179039	1	4566	tags=30%, list=18%, signal=37%
REACTOME_MITOTIC_G1_PHASE_AND_G1_S_TRANSITION	REACTOME_MITOTIC_G1_PHASE_AND_G1_S_TRANSITION		148	0.359911	1.46944	0.0143369	0.183213	1	5288	tags=32%, list=21%, signal=41%
REACTOME_TRAF6_MEDIATED_IRF7_ACTIVATION	REACTOME_TRAF6_MEDIATED_IRF7_ACTIVATION		16	0.542896	1.4688	0.07743	0.18303	1	4571	tags=63%, list=18%, signal=76%
REACTOME_APC_C_MEDIATED_DEGRADATION_OF_CELL_CYCLE_PROTEINS	REACTOME_APC_C_MEDIATED_DEGRADATION_OF_CELL_CYCLE_PROTEINS		86	0.384329	1.4684	0.0288714	0.182495	1	5865	tags=42%, list=23%, signal=54%
REACTOME_NOD1_2_SIGNALING_PATHWAY	REACTOME_NOD1_2_SIGNALING_PATHWAY		36	0.448204	1.46426	0.0480481	0.187029	1	6945	tags=39%, list=27%, signal=53%
REACTOME_PLATELET_CALCIUM_HOMEOSTASIS	REACTOME_PLATELET_CALCIUM_HOMEOSTASIS		26	0.4781	1.45944	0.0633484	0.192296	1	3691	tags=35%, list=14%, signal=40%
P53_DN.V1_UP	P53_DN.V1_UP		178	0.347775	1.45934	0.00466744	0.191396	1	5595	tags=30%, list=22%, signal=39%
REACTOME_PROGRAMMED_CELL_DEATH	REACTOME_PROGRAMMED_CELL_DEATH		197	0.350047	1.45737	0.00456621	0.193044	1	5493	tags=35%, list=21%, signal=44%
REACTOME_ROLE_OF_PHOSPHOLIPIDS_IN_PHAGOCYTOSIS	REACTOME_ROLE_OF_PHOSPHOLIPIDS_IN_PHAGOCYTOSIS		82	0.383957	1.45537	0.0291777	0.194701	1	9388	tags=63%, list=37%, signal=100%
REACTOME_GAP_JUNCTION_TRAFFICKING_AND_REGULATION	REACTOME_GAP_JUNCTION_TRAFFICKING_AND_REGULATION		38	0.446011	1.4548	0.0597907	0.194477	1	4012	tags=24%, list=16%, signal=28%
REACTOME_NEGATIVE_REGULATION_OF_NMDA_RECEPTOR_MEDIATED_NEURONAL_TRANSMISSION	REACTOME_NEGATIVE_REGULATION_OF_NMDA_RECEPTOR_MEDIATED_NEURONAL_TRANSMISSION		21	0.503954	1.45433	0.0646203	0.194111	1	940	tags=19%, list=4%, signal=20%
KEGG_GLYCOSPHINGOLIPID_BIOSYNTHESIS_LACTO_AND_NEOLACTO_SERIES	KEGG_GLYCOSPHINGOLIPID_BIOSYNTHESIS_LACTO_AND_NEOLACTO_SERIES		24	0.486551	1.45431	0.0602606	0.193119	1	4314	tags=33%, list=17%, signal=40%
REACTOME_ABC_FAMILY_PROTEINS_MEDIATED_TRANSPORT	REACTOME_ABC_FAMILY_PROTEINS_MEDIATED_TRANSPORT		101	0.370637	1.45171	0.021025	0.19588	1	5439	tags=37%, list=21%, signal=46%
BRCA1_DN.V1_DN	BRCA1_DN.V1_DN		115	0.362857	1.45102	0.0230179	0.195784	1	4160	tags=24%, list=16%, signal=29%
PRC2_EZH2_UP.V1_DN	PRC2_EZH2_UP.V1_DN		169	0.345389	1.45095	0.00852619	0.194884	1	3553	tags=20%, list=14%, signal=23%
CRX_NRL_DN.V1_UP	CRX_NRL_DN.V1_UP		121	0.363115	1.44755	0.0165394	0.198255	1	6658	tags=37%, list=26%, signal=50%
REACTOME_TRANSPORT_OF_INORGANIC_CATIONS_ANIONS_AND_AMINO_ACIDS_OLIGOPEPTIDES	REACTOME_TRANSPORT_OF_INORGANIC_CATIONS_ANIONS_AND_AMINO_ACIDS_OLIGOPEPTIDES		93	0.377032	1.44701	0.0310881	0.197944	1	4694	tags=30%, list=18%, signal=37%
IL2_UP.V1_UP	IL2_UP.V1_UP		162	0.350072	1.44508	0.0142349	0.199536	1	7298	tags=43%, list=28%, signal=59%
REACTOME_ATTENUATION_PHASE	REACTOME_ATTENUATION_PHASE		25	0.477551	1.44448	0.0736842	0.199483	1	6443	tags=56%, list=25%, signal=75%
REACTOME_GAP_JUNCTION_ASSEMBLY	REACTOME_GAP_JUNCTION_ASSEMBLY		25	0.487353	1.44346	0.0590112	0.199916	1	4012	tags=24%, list=16%, signal=28%
REACTOME_RAB_GERANYLGERANYLATION	REACTOME_RAB_GERANYLGERANYLATION		65	0.40618	1.44205	0.0407056	0.200661	1	2873	tags=25%, list=11%, signal=28%
RAPA_EARLY_UP.V1_UP	RAPA_EARLY_UP.V1_UP		140	0.357146	1.44052	0.0100756	0.201568	1	5306	tags=29%, list=21%, signal=36%
REACTOME_TOLL_LIKE_RECEPTOR_TLR1_TLR2_CASCADE	REACTOME_TOLL_LIKE_RECEPTOR_TLR1_TLR2_CASCADE		98	0.370871	1.43966	0.0288714	0.201751	1	6126	tags=41%, list=24%, signal=53%
REACTOME_FERTILIZATION	REACTOME_FERTILIZATION		17	0.520352	1.43502	0.095624	0.207495	1	5737	tags=35%, list=22%, signal=45%
REACTOME_FCERI_MEDIATED_MAPK_ACTIVATION	REACTOME_FCERI_MEDIATED_MAPK_ACTIVATION		87	0.377495	1.43136	0.0238411	0.211474	1	9388	tags=67%, list=37%, signal=105%
REACTOME_UPTAKE_AND_ACTIONS_OF_BACTERIAL_TOXINS	REACTOME_UPTAKE_AND_ACTIONS_OF_BACTERIAL_TOXINS		28	0.469823	1.42933	0.0579495	0.213574	1	5595	tags=43%, list=22%, signal=55%
KEGG_P53_SIGNALING_PATHWAY	KEGG_P53_SIGNALING_PATHWAY		67	0.399708	1.42912	0.0303867	0.212899	1	4010	tags=27%, list=16%, signal=32%
REACTOME_REGULATION_OF_HMOX1_EXPRESSION_AND_ACTIVITY	REACTOME_REGULATION_OF_HMOX1_EXPRESSION_AND_ACTIVITY		63	0.392961	1.42747	0.0495868	0.21439	1	4980	tags=43%, list=19%, signal=53%
REACTOME_PI_3K_CASCADE_FGFR1	REACTOME_PI_3K_CASCADE_FGFR1		15	0.53118	1.42572	0.0884808	0.215893	1	6066	tags=33%, list=24%, signal=44%
REACTOME_VOLTAGE_GATED_POTASSIUM_CHANNELS	REACTOME_VOLTAGE_GATED_POTASSIUM_CHANNELS		31	0.438089	1.42425	0.0736677	0.217035	1	3291	tags=16%, list=13%, signal=18%
RELA_DN.V1_UP	RELA_DN.V1_UP		126	0.354584	1.42418	0.0236318	0.216111	1	7886	tags=48%, list=31%, signal=68%
CTIP_DN.V1_UP	CTIP_DN.V1_UP		100	0.36408	1.42261	0.03125	0.217441	1	4139	tags=24%, list=16%, signal=28%
REACTOME_REGULATION_OF_HSF1_MEDIATED_HEAT_SHOCK_RESPONSE	REACTOME_REGULATION_OF_HSF1_MEDIATED_HEAT_SHOCK_RESPONSE		77	0.377597	1.41607	0.0342556	0.226337	1	2045	tags=21%, list=8%, signal=23%
REACTOME_NGF_STIMULATED_TRANSCRIPTION	REACTOME_NGF_STIMULATED_TRANSCRIPTION		37	0.438815	1.41473	0.0719755	0.227351	1	2885	tags=30%, list=11%, signal=33%
REACTOME_REGULATION_OF_PTEN_STABILITY_AND_ACTIVITY	REACTOME_REGULATION_OF_PTEN_STABILITY_AND_ACTIVITY		67	0.38626	1.41419	0.0455192	0.227114	1	5439	tags=45%, list=21%, signal=57%
REACTOME_DNA_REPLICATION	REACTOME_DNA_REPLICATION		126	0.350545	1.41274	0.0246609	0.228497	1	5439	tags=33%, list=21%, signal=41%
KRAS.DF.V1_UP	KRAS.DF.V1_UP		178	0.337577	1.41185	0.0129108	0.228913	1	4490	tags=29%, list=17%, signal=35%
REACTOME_TICAM1_RIP1_MEDIATED_IKK_COMPLEX_RECRUITMENT	REACTOME_TICAM1_RIP1_MEDIATED_IKK_COMPLEX_RECRUITMENT		19	0.509176	1.41147	0.0751252	0.228463	1	5493	tags=53%, list=21%, signal=67%
REACTOME_ASSEMBLY_OF_THE_HIV_VIRION	REACTOME_ASSEMBLY_OF_THE_HIV_VIRION		16	0.522148	1.40493	0.0827815	0.23754	1	3968	tags=38%, list=15%, signal=44%
REACTOME_RAF_ACTIVATION	REACTOME_RAF_ACTIVATION		34	0.440246	1.4036	0.0739599	0.238533	1	2816	tags=24%, list=11%, signal=26%
PKCA_DN.V1_UP	PKCA_DN.V1_UP		129	0.350856	1.40311	0.019802	0.238229	1	3383	tags=21%, list=13%, signal=24%
REACTOME_TOLL_LIKE_RECEPTOR_9_TLR9_CASCADE	REACTOME_TOLL_LIKE_RECEPTOR_9_TLR9_CASCADE		93	0.364995	1.40202	0.0301837	0.238949	1	4534	tags=31%, list=18%, signal=38%
KEGG_DORSO_VENTRAL_AXIS_FORMATION	KEGG_DORSO_VENTRAL_AXIS_FORMATION		22	0.475858	1.39814	0.0902022	0.24427	1	4916	tags=36%, list=19%, signal=45%
REACTOME_SIGNALING_BY_THE_B_CELL_RECEPTOR_BCR	REACTOME_SIGNALING_BY_THE_B_CELL_RECEPTOR_BCR		164	0.335865	1.3941	0.0180505	0.249671	1	7321	tags=47%, list=28%, signal=65%
KEGG_MAPK_SIGNALING_PATHWAY	KEGG_MAPK_SIGNALING_PATHWAY		239	0.32487	1.39268	0.00782123	0.250804	1	6126	tags=30%, list=24%, signal=39%
REACTOME_PYROPTOSIS	REACTOME_PYROPTOSIS		26	0.460003	1.39258	0.105919	0.24983	1	1262	tags=15%, list=5%, signal=16%
DCA_UP.V1_UP	DCA_UP.V1_UP		145	0.342735	1.39125	0.0339394	0.251111	1	3490	tags=18%, list=14%, signal=21%
HALLMARK_MYOGENESIS	HALLMARK_MYOGENESIS		181	0.331785	1.39098	0.0266821	0.250458	1	5736	tags=30%, list=22%, signal=39%
REACTOME_CELL_EXTRACELLULAR_MATRIX_INTERACTIONS	REACTOME_CELL_EXTRACELLULAR_MATRIX_INTERACTIONS		18	0.492693	1.39056	0.0903226	0.250065	1	6785	tags=56%, list=26%, signal=75%
REACTOME_ONCOGENE_INDUCED_SENESCENCE	REACTOME_ONCOGENE_INDUCED_SENESCENCE		34	0.435743	1.38416	0.087156	0.26005	1	6864	tags=47%, list=27%, signal=64%
HALLMARK_EPITHELIAL_MESENCHYMAL_TRANSITION	HALLMARK_EPITHELIAL_MESENCHYMAL_TRANSITION		188	0.325207	1.38252	0.0241838	0.26161	1	6825	tags=35%, list=27%, signal=47%
ESC_J1_UP_LATE.V1_UP	ESC_J1_UP_LATE.V1_UP		151	0.337066	1.37855	0.032491	0.267065	1	3724	tags=20%, list=14%, signal=23%
REACTOME_LATE_ENDOSOMAL_MICROAUTOPHAGY	REACTOME_LATE_ENDOSOMAL_MICROAUTOPHAGY		33	0.431847	1.37682	0.0789866	0.268916	1	4342	tags=33%, list=17%, signal=40%
REACTOME_CYTOPROTECTION_BY_HMOX1	REACTOME_CYTOPROTECTION_BY_HMOX1		121	0.34573	1.37593	0.0299252	0.269445	1	6189	tags=40%, list=24%, signal=52%
REACTOME_INTERLEUKIN_12_SIGNALING	REACTOME_INTERLEUKIN_12_SIGNALING		46	0.403977	1.37315	0.0750361	0.273291	1	6502	tags=46%, list=25%, signal=61%
REACTOME_FCGR3A_MEDIATED_IL10_SYNTHESIS	REACTOME_FCGR3A_MEDIATED_IL10_SYNTHESIS		94	0.349951	1.37314	0.0531915	0.27214	1	9388	tags=61%, list=37%, signal=95%
REACTOME_POTASSIUM_CHANNELS	REACTOME_POTASSIUM_CHANNELS		83	0.359055	1.37282	0.0561497	0.271527	1	4177	tags=22%, list=16%, signal=26%
REACTOME_FC_EPSILON_RECEPTOR_FCERI_SIGNALING	REACTOME_FC_EPSILON_RECEPTOR_FCERI_SIGNALING		184	0.326651	1.36917	0.0262843	0.277001	1	7215	tags=44%, list=28%, signal=61%
REACTOME_BETA_CATENIN_INDEPENDENT_WNT_SIGNALING	REACTOME_BETA_CATENIN_INDEPENDENT_WNT_SIGNALING		141	0.336232	1.36805	0.0400972	0.277929	1	4980	tags=28%, list=19%, signal=35%
KRAS.300_UP.V1_DN	KRAS.300_UP.V1_DN		105	0.346092	1.36791	0.0687419	0.277009	1	6466	tags=31%, list=25%, signal=42%
REACTOME_SEPARATION_OF_SISTER_CHROMATIDS	REACTOME_SEPARATION_OF_SISTER_CHROMATIDS		180	0.324631	1.36696	0.021764	0.277522	1	4980	tags=29%, list=19%, signal=36%
BMI1_DN_MEL18_DN.V1_DN	BMI1_DN_MEL18_DN.V1_DN		133	0.335622	1.36672	0.0461923	0.276866	1	3864	tags=17%, list=15%, signal=19%
REACTOME_G_ALPHA_S_SIGNALLING_EVENTS	REACTOME_G_ALPHA_S_SIGNALLING_EVENTS		105	0.347561	1.36662	0.0476788	0.275904	1	3030	tags=18%, list=12%, signal=20%
TGFB_UP.V1_UP	TGFB_UP.V1_UP		167	0.329263	1.36472	0.0295159	0.278141	1	6475	tags=35%, list=25%, signal=46%
REACTOME_CELLULAR_SENESCENCE	REACTOME_CELLULAR_SENESCENCE		129	0.338392	1.3644	0.0385572	0.277533	1	3212	tags=22%, list=13%, signal=25%
REACTOME_FOXO_MEDIATED_TRANSCRIPTION_OF_CELL_DEATH_GENES	REACTOME_FOXO_MEDIATED_TRANSCRIPTION_OF_CELL_DEATH_GENES		16	0.504151	1.36408	0.138225	0.276895	1	3399	tags=44%, list=13%, signal=50%
REACTOME_TRIGLYCERIDE_METABOLISM	REACTOME_TRIGLYCERIDE_METABOLISM		28	0.436695	1.36356	0.113354	0.276592	1	5682	tags=32%, list=22%, signal=41%
REACTOME_S_PHASE	REACTOME_S_PHASE		160	0.330674	1.36241	0.0346475	0.27743	1	5439	tags=33%, list=21%, signal=41%
SNF5_DN.V1_UP	SNF5_DN.V1_UP		153	0.331775	1.361	0.0334988	0.278811	1	4709	tags=24%, list=18%, signal=29%
HALLMARK_CHOLESTEROL_HOMEOSTASIS	HALLMARK_CHOLESTEROL_HOMEOSTASIS		72	0.3643	1.35821	0.0582011	0.282676	1	5845	tags=35%, list=23%, signal=45%
REACTOME_ANTI_INFLAMMATORY_RESPONSE_FAVOURING_LEISHMANIA_PARASITE_INFECTION	REACTOME_ANTI_INFLAMMATORY_RESPONSE_FAVOURING_LEISHMANIA_PARASITE_INFECTION		185	0.324718	1.35594	0.0290557	0.28563	1	7339	tags=37%, list=29%, signal=52%
CSR_LATE_UP.V1_DN	CSR_LATE_UP.V1_DN		134	0.332117	1.35586	0.0406905	0.284664	1	3658	tags=18%, list=14%, signal=21%
HALLMARK_P53_PATHWAY	HALLMARK_P53_PATHWAY		189	0.317878	1.35298	0.0258519	0.288981	1	4556	tags=26%, list=18%, signal=31%
REACTOME_SIGNALING_BY_FLT3_ITD_AND_TKD_MUTANTS	REACTOME_SIGNALING_BY_FLT3_ITD_AND_TKD_MUTANTS		16	0.498345	1.35179	0.116613	0.290115	1	6347	tags=56%, list=25%, signal=75%
IL15_UP.V1_UP	IL15_UP.V1_UP		165	0.328154	1.35085	0.0362319	0.290543	1	6482	tags=36%, list=25%, signal=48%
REACTOME_PHASE_4_RESTING_MEMBRANE_POTENTIAL	REACTOME_PHASE_4_RESTING_MEMBRANE_POTENTIAL		16	0.498913	1.35067	0.130795	0.289664	1	4177	tags=38%, list=16%, signal=45%
REACTOME_TRANSCRIPTIONAL_REGULATION_BY_VENTX	REACTOME_TRANSCRIPTIONAL_REGULATION_BY_VENTX		40	0.40294	1.34787	0.09375	0.293977	1	3212	tags=25%, list=13%, signal=29%
PTEN_DN.V1_DN	PTEN_DN.V1_DN		153	0.326984	1.34442	0.0422705	0.299128	1	4363	tags=23%, list=17%, signal=27%
REACTOME_DOPAMINE_NEUROTRANSMITTER_RELEASE_CYCLE	REACTOME_DOPAMINE_NEUROTRANSMITTER_RELEASE_CYCLE		22	0.463163	1.3413	0.118297	0.303948	1	6128	tags=41%, list=24%, signal=54%
REACTOME_INSULIN_PROCESSING	REACTOME_INSULIN_PROCESSING		25	0.439013	1.34108	0.111111	0.303209	1	2	tags=4%, list=0%, signal=4%
HALLMARK_TGF_BETA_SIGNALING	HALLMARK_TGF_BETA_SIGNALING		54	0.381022	1.33975	0.0907821	0.30471	1	6096	tags=41%, list=24%, signal=53%
IL15_UP.V1_DN	IL15_UP.V1_DN		141	0.325866	1.33818	0.0556242	0.306447	1	2697	tags=13%, list=10%, signal=15%
REACTOME_NEGATIVE_REGULATION_OF_MET_ACTIVITY	REACTOME_NEGATIVE_REGULATION_OF_MET_ACTIVITY		21	0.45788	1.33711	0.116013	0.307126	1	4916	tags=43%, list=19%, signal=53%
REACTOME_SEMA4D_IN_SEMAPHORIN_SIGNALING	REACTOME_SEMA4D_IN_SEMAPHORIN_SIGNALING		24	0.450398	1.33676	0.106646	0.306585	1	8367	tags=63%, list=33%, signal=93%
REACTOME_NUCLEAR_EVENTS_KINASE_AND_TRANSCRIPTION_FACTOR_ACTIVATION	REACTOME_NUCLEAR_EVENTS_KINASE_AND_TRANSCRIPTION_FACTOR_ACTIVATION		59	0.36867	1.33669	0.0959666	0.30556	1	2885	tags=25%, list=11%, signal=29%
SINGH_KRAS_DEPENDENCY_SIGNATURE	SINGH_KRAS_DEPENDENCY_SIGNATURE		16	0.493433	1.33487	0.143322	0.307983	1	2156	tags=25%, list=8%, signal=27%
REACTOME_CYTOSOLIC_SENSORS_OF_PATHOGEN_ASSOCIATED_DNA	REACTOME_CYTOSOLIC_SENSORS_OF_PATHOGEN_ASSOCIATED_DNA		60	0.36783	1.33351	0.0920863	0.309293	1	6443	tags=43%, list=25%, signal=58%
PDGF_ERK_DN.V1_DN	PDGF_ERK_DN.V1_DN		140	0.32916	1.33342	0.0518697	0.308285	1	5218	tags=32%, list=20%, signal=40%
E2F1_UP.V1_DN	E2F1_UP.V1_DN		178	0.31928	1.33259	0.0412736	0.308828	1	4853	tags=25%, list=19%, signal=31%
MTOR_UP.V1_DN	MTOR_UP.V1_DN		166	0.317881	1.33234	0.05	0.308154	1	5041	tags=28%, list=20%, signal=35%
KRAS.600_UP.V1_DN	KRAS.600_UP.V1_DN		202	0.313053	1.3314	0.041816	0.308763	1	6466	tags=31%, list=25%, signal=41%
REACTOME_ACTIVATION_OF_BAD_AND_TRANSLOCATION_TO_MITOCHONDRIA	REACTOME_ACTIVATION_OF_BAD_AND_TRANSLOCATION_TO_MITOCHONDRIA		15	0.500064	1.33088	0.140468	0.308569	1	6224	tags=60%, list=24%, signal=79%
REACTOME_SYNTHESIS_OF_PIPS_AT_THE_EARLY_ENDOSOME_MEMBRANE	REACTOME_SYNTHESIS_OF_PIPS_AT_THE_EARLY_ENDOSOME_MEMBRANE		16	0.494941	1.32905	0.134021	0.310807	1	1476	tags=25%, list=6%, signal=27%
REACTOME_SEMA4D_INDUCED_CELL_MIGRATION_AND_GROWTH_CONE_COLLAPSE	REACTOME_SEMA4D_INDUCED_CELL_MIGRATION_AND_GROWTH_CONE_COLLAPSE		20	0.457293	1.32859	0.13289	0.310514	1	5151	tags=40%, list=20%, signal=50%
REACTOME_GENE_AND_PROTEIN_EXPRESSION_BY_JAK_STAT_SIGNALING_AFTER_INTERLEUKIN_12_STIMULATION	REACTOME_GENE_AND_PROTEIN_EXPRESSION_BY_JAK_STAT_SIGNALING_AFTER_INTERLEUKIN_12_STIMULATION		37	0.403706	1.32717	0.116641	0.312098	1	6502	tags=49%, list=25%, signal=65%
REACTOME_MITOTIC_METAPHASE_AND_ANAPHASE	REACTOME_MITOTIC_METAPHASE_AND_ANAPHASE		225	0.309275	1.32392	0.0264368	0.317336	1	4980	tags=28%, list=19%, signal=35%
REACTOME_MITOTIC_G2_G2_M_PHASES	REACTOME_MITOTIC_G2_G2_M_PHASES		193	0.312447	1.32207	0.0344037	0.319677	1	5652	tags=31%, list=22%, signal=39%
REACTOME_SEROTONIN_NEUROTRANSMITTER_RELEASE_CYCLE	REACTOME_SEROTONIN_NEUROTRANSMITTER_RELEASE_CYCLE		17	0.481774	1.32044	0.160959	0.321872	1	6128	tags=47%, list=24%, signal=62%
REACTOME_FRS_MEDIATED_FGFR4_SIGNALING	REACTOME_FRS_MEDIATED_FGFR4_SIGNALING		16	0.491588	1.32032	0.150502	0.320917	1	7652	tags=63%, list=30%, signal=89%
REACTOME_HIV_INFECTION	REACTOME_HIV_INFECTION		224	0.306367	1.31993	0.0385064	0.320514	1	5466	tags=32%, list=21%, signal=40%
REACTOME_FRS_MEDIATED_FGFR3_SIGNALING	REACTOME_FRS_MEDIATED_FGFR3_SIGNALING		16	0.480599	1.31909	0.139344	0.321137	1	6347	tags=50%, list=25%, signal=66%
REACTOME_L1CAM_INTERACTIONS	REACTOME_L1CAM_INTERACTIONS		112	0.33167	1.31891	0.0539846	0.320337	1	4783	tags=21%, list=19%, signal=25%
REACTOME_LEISHMANIA_INFECTION	REACTOME_LEISHMANIA_INFECTION		269	0.303191	1.31791	0.0269966	0.321341	1	7339	tags=36%, list=29%, signal=49%
REACTOME_RHO_GTPASES_ACTIVATE_IQGAPS	REACTOME_RHO_GTPASES_ACTIVATE_IQGAPS		28	0.424079	1.3164	0.136292	0.323213	1	4012	tags=21%, list=16%, signal=25%
REACTOME_DOWNSTREAM_SIGNALING_OF_ACTIVATED_FGFR4	REACTOME_DOWNSTREAM_SIGNALING_OF_ACTIVATED_FGFR4		21	0.45362	1.31474	0.139683	0.325377	1	6944	tags=48%, list=27%, signal=65%
REACTOME_SIGNALING_BY_TGFB_FAMILY_MEMBERS	REACTOME_SIGNALING_BY_TGFB_FAMILY_MEMBERS		96	0.343201	1.30982	0.0847458	0.334112	1	4462	tags=28%, list=17%, signal=34%
REACTOME_NEGATIVE_REGULATION_OF_MAPK_PATHWAY	REACTOME_NEGATIVE_REGULATION_OF_MAPK_PATHWAY		42	0.391269	1.30971	0.128889	0.333161	1	6443	tags=40%, list=25%, signal=54%
REACTOME_TGF_BETA_RECEPTOR_SIGNALING_IN_EMT_EPITHELIAL_TO_MESENCHYMAL_TRANSITION	REACTOME_TGF_BETA_RECEPTOR_SIGNALING_IN_EMT_EPITHELIAL_TO_MESENCHYMAL_TRANSITION		16	0.483963	1.30761	0.160473	0.33618	1	3968	tags=38%, list=15%, signal=44%
MEL18_DN.V1_DN	MEL18_DN.V1_DN		131	0.32067	1.30434	0.0614379	0.3418	1	5589	tags=27%, list=22%, signal=35%
REACTOME_CONSTITUTIVE_SIGNALING_BY_ABERRANT_PI3K_IN_CANCER	REACTOME_CONSTITUTIVE_SIGNALING_BY_ABERRANT_PI3K_IN_CANCER		69	0.352843	1.30424	0.119114	0.340799	1	7652	tags=39%, list=30%, signal=56%
REACTOME_DOWNSTREAM_SIGNALING_OF_ACTIVATED_FGFR3	REACTOME_DOWNSTREAM_SIGNALING_OF_ACTIVATED_FGFR3		21	0.450649	1.30224	0.15949	0.343946	1	6347	tags=43%, list=25%, signal=57%
REACTOME_REGULATION_OF_LIPID_METABOLISM_BY_PPARALPHA	REACTOME_REGULATION_OF_LIPID_METABOLISM_BY_PPARALPHA		109	0.333038	1.3017	0.087013	0.343838	1	5661	tags=39%, list=22%, signal=49%
REACTOME_BLOOD_GROUP_SYSTEMS_BIOSYNTHESIS	REACTOME_BLOOD_GROUP_SYSTEMS_BIOSYNTHESIS		19	0.457676	1.30132	0.149923	0.343474	1	3097	tags=21%, list=12%, signal=24%
PRC1_BMI_UP.V1_UP	PRC1_BMI_UP.V1_UP		157	0.314117	1.30069	0.0526316	0.343664	1	4330	tags=22%, list=17%, signal=27%
KEGG_VIRAL_MYOCARDITIS	KEGG_VIRAL_MYOCARDITIS		65	0.352358	1.29835	0.115862	0.347233	1	6505	tags=32%, list=25%, signal=43%
REACTOME_CELLULAR_RESPONSE_TO_CHEMICAL_STRESS	REACTOME_CELLULAR_RESPONSE_TO_CHEMICAL_STRESS		153	0.310014	1.29808	0.0726191	0.346635	1	6243	tags=37%, list=24%, signal=48%
REACTOME_CASPASE_ACTIVATION_VIA_DEATH_RECEPTORS_IN_THE_PRESENCE_OF_LIGAND	REACTOME_CASPASE_ACTIVATION_VIA_DEATH_RECEPTORS_IN_THE_PRESENCE_OF_LIGAND		16	0.482003	1.29794	0.149109	0.345769	1	7449	tags=63%, list=29%, signal=88%
REACTOME_TRANSCRIPTIONAL_REGULATION_BY_RUNX1	REACTOME_TRANSCRIPTIONAL_REGULATION_BY_RUNX1		171	0.311572	1.2971	0.0637019	0.346331	1	5439	tags=33%, list=21%, signal=42%
REACTOME_SIGNALING_BY_ERBB2	REACTOME_SIGNALING_BY_ERBB2		48	0.378111	1.29694	0.114286	0.345457	1	6443	tags=42%, list=25%, signal=56%
REACTOME_CD209_DC_SIGN_SIGNALING	REACTOME_CD209_DC_SIGN_SIGNALING		20	0.454735	1.29687	0.156766	0.344474	1	4321	tags=35%, list=17%, signal=42%
REACTOME_HOST_INTERACTIONS_OF_HIV_FACTORS	REACTOME_HOST_INTERACTIONS_OF_HIV_FACTORS		126	0.319782	1.29626	0.0924051	0.344655	1	4980	tags=28%, list=19%, signal=34%
REACTOME_RET_SIGNALING	REACTOME_RET_SIGNALING		37	0.398043	1.2939	0.141791	0.348232	1	5206	tags=30%, list=20%, signal=37%
REACTOME_RHO_GTPASES_ACTIVATE_PKNS	REACTOME_RHO_GTPASES_ACTIVATE_PKNS		33	0.405028	1.29203	0.153619	0.351057	1	4542	tags=33%, list=18%, signal=40%
REACTOME_PI3K_EVENTS_IN_ERBB2_SIGNALING	REACTOME_PI3K_EVENTS_IN_ERBB2_SIGNALING		15	0.493976	1.29192	0.147841	0.350116	1	5561	tags=40%, list=22%, signal=51%
REACTOME_SIGNALING_BY_NOTCH	REACTOME_SIGNALING_BY_NOTCH		173	0.307539	1.29039	0.0625752	0.352125	1	5166	tags=29%, list=20%, signal=37%
REACTOME_CIRCADIAN_CLOCK	REACTOME_CIRCADIAN_CLOCK		68	0.355322	1.28927	0.10221	0.353366	1	7134	tags=49%, list=28%, signal=67%
ERBB2_UP.V1_UP	ERBB2_UP.V1_UP		175	0.307117	1.28728	0.060355	0.356226	1	5071	tags=26%, list=20%, signal=33%
REACTOME_DISORDERS_OF_TRANSMEMBRANE_TRANSPORTERS	REACTOME_DISORDERS_OF_TRANSMEMBRANE_TRANSPORTERS		161	0.313149	1.28727	0.0785973	0.355097	1	4980	tags=29%, list=19%, signal=36%
KRAS.DF.V1_DN	KRAS.DF.V1_DN		164	0.309023	1.28694	0.0749698	0.3546	1	5893	tags=29%, list=23%, signal=37%
REACTOME_ACTIVATED_NOTCH1_TRANSMITS_SIGNAL_TO_THE_NUCLEUS	REACTOME_ACTIVATED_NOTCH1_TRANSMITS_SIGNAL_TO_THE_NUCLEUS		30	0.41431	1.28265	0.149163	0.362267	1	5166	tags=30%, list=20%, signal=38%
REACTOME_CELLULAR_RESPONSE_TO_HEAT_STRESS	REACTOME_CELLULAR_RESPONSE_TO_HEAT_STRESS		95	0.331047	1.28254	0.106326	0.361307	1	3192	tags=22%, list=12%, signal=25%
REACTOME_DARPP_32_EVENTS	REACTOME_DARPP_32_EVENTS		23	0.427365	1.2813	0.147541	0.362792	1	3566	tags=30%, list=14%, signal=35%
REACTOME_SUMOYLATION_OF_SUMOYLATION_PROTEINS	REACTOME_SUMOYLATION_OF_SUMOYLATION_PROTEINS		34	0.402745	1.28049	0.150388	0.363425	1	2913	tags=26%, list=11%, signal=30%
ATF2_S_UP.V1_UP	ATF2_S_UP.V1_UP		164	0.309294	1.27949	0.0686747	0.364384	1	3003	tags=20%, list=12%, signal=22%
REACTOME_NEUROTRANSMITTER_RELEASE_CYCLE	REACTOME_NEUROTRANSMITTER_RELEASE_CYCLE		42	0.376089	1.2764	0.154198	0.36979	1	7719	tags=48%, list=30%, signal=68%
REACTOME_SIGNALING_BY_PTK6	REACTOME_SIGNALING_BY_PTK6		53	0.367332	1.26945	0.151645	0.384021	1	6673	tags=36%, list=26%, signal=48%
REACTOME_CTLA4_INHIBITORY_SIGNALING	REACTOME_CTLA4_INHIBITORY_SIGNALING		21	0.446442	1.26884	0.17496	0.384086	1	5946	tags=43%, list=23%, signal=56%
ATM_DN.V1_UP	ATM_DN.V1_UP		112	0.31744	1.26711	0.108586	0.386771	1	3901	tags=19%, list=15%, signal=22%
REACTOME_RESPONSE_TO_ELEVATED_PLATELET_CYTOSOLIC_CA2	REACTOME_RESPONSE_TO_ELEVATED_PLATELET_CYTOSOLIC_CA2		118	0.313818	1.2667	0.114754	0.386467	1	6783	tags=33%, list=26%, signal=45%
REACTOME_OTHER_INTERLEUKIN_SIGNALING	REACTOME_OTHER_INTERLEUKIN_SIGNALING		23	0.421962	1.26606	0.180064	0.386645	1	2510	tags=22%, list=10%, signal=24%
REACTOME_MYOGENESIS	REACTOME_MYOGENESIS		26	0.414586	1.26507	0.1792	0.387652	1	2590	tags=23%, list=10%, signal=26%
REACTOME_HEDGEHOG_OFF_STATE	REACTOME_HEDGEHOG_OFF_STATE		110	0.31863	1.26347	0.102199	0.389776	1	4980	tags=28%, list=19%, signal=35%
REACTOME_CELL_CYCLE_CHECKPOINTS	REACTOME_CELL_CYCLE_CHECKPOINTS		246	0.295414	1.26324	0.0678532	0.389003	1	4980	tags=27%, list=19%, signal=33%
NOTCH_DN.V1_UP	NOTCH_DN.V1_UP		156	0.304754	1.26203	0.0925267	0.390472	1	5716	tags=28%, list=22%, signal=36%
IL21_UP.V1_DN	IL21_UP.V1_DN		140	0.307273	1.25981	0.0977157	0.394164	1	4408	tags=21%, list=17%, signal=25%
MYC_UP.V1_DN	MYC_UP.V1_DN		148	0.31073	1.25878	0.114144	0.395202	1	5332	tags=30%, list=21%, signal=37%
KEGG_FC_GAMMA_R_MEDIATED_PHAGOCYTOSIS	KEGG_FC_GAMMA_R_MEDIATED_PHAGOCYTOSIS		95	0.323864	1.25815	0.122047	0.39529	1	4335	tags=24%, list=17%, signal=29%
GCNP_SHH_UP_LATE.V1_DN	GCNP_SHH_UP_LATE.V1_DN		155	0.301425	1.25632	0.0896806	0.398169	1	4399	tags=21%, list=17%, signal=26%
REACTOME_SIGNALING_BY_ERBB2_IN_CANCER	REACTOME_SIGNALING_BY_ERBB2_IN_CANCER		24	0.424902	1.25327	0.169304	0.403918	1	6347	tags=46%, list=25%, signal=61%
REACTOME_DOWNSTREAM_SIGNALING_OF_ACTIVATED_FGFR2	REACTOME_DOWNSTREAM_SIGNALING_OF_ACTIVATED_FGFR2		24	0.418219	1.25303	0.19969	0.403228	1	6347	tags=38%, list=25%, signal=50%
REACTOME_G_ALPHA_Q_SIGNALLING_EVENTS	REACTOME_G_ALPHA_Q_SIGNALLING_EVENTS		162	0.300868	1.25269	0.0874251	0.402833	1	3974	tags=20%, list=15%, signal=24%
REACTOME_GROWTH_HORMONE_RECEPTOR_SIGNALING	REACTOME_GROWTH_HORMONE_RECEPTOR_SIGNALING		23	0.421269	1.25118	0.192547	0.404896	1	6214	tags=39%, list=24%, signal=52%
PRC2_EZH2_UP.V1_UP	PRC2_EZH2_UP.V1_UP		168	0.299071	1.25107	0.0892857	0.403987	1	4011	tags=19%, list=16%, signal=22%
REACTOME_GLYCOLYSIS	REACTOME_GLYCOLYSIS		67	0.343461	1.25039	0.153432	0.404324	1	3635	tags=22%, list=14%, signal=26%
REACTOME_CYCLIN_D_ASSOCIATED_EVENTS_IN_G1	REACTOME_CYCLIN_D_ASSOCIATED_EVENTS_IN_G1		47	0.362363	1.24829	0.158126	0.407734	1	4397	tags=28%, list=17%, signal=33%
JNK_DN.V1_UP	JNK_DN.V1_UP		153	0.301663	1.24813	0.0998782	0.406909	1	4633	tags=24%, list=18%, signal=29%
REACTOME_PARASITE_INFECTION	REACTOME_PARASITE_INFECTION		116	0.310465	1.24772	0.125	0.4067	1	9388	tags=58%, list=37%, signal=91%
REACTOME_SCAVENGING_BY_CLASS_A_RECEPTORS	REACTOME_SCAVENGING_BY_CLASS_A_RECEPTORS		19	0.437115	1.24714	0.178862	0.406867	1	9976	tags=74%, list=39%, signal=120%
CRX_DN.V1_DN	CRX_DN.V1_DN		114	0.313494	1.24616	0.129936	0.407765	1	3704	tags=20%, list=14%, signal=23%
REACTOME_FRS_MEDIATED_FGFR2_SIGNALING	REACTOME_FRS_MEDIATED_FGFR2_SIGNALING		19	0.441669	1.24478	0.192496	0.409701	1	6347	tags=42%, list=25%, signal=56%
REACTOME_HSF1_DEPENDENT_TRANSACTIVATION	REACTOME_HSF1_DEPENDENT_TRANSACTIVATION		34	0.387922	1.24251	0.179448	0.413695	1	6443	tags=47%, list=25%, signal=63%
REACTOME_EPHB_MEDIATED_FORWARD_SIGNALING	REACTOME_EPHB_MEDIATED_FORWARD_SIGNALING		41	0.365913	1.23791	0.183183	0.423225	1	8417	tags=54%, list=33%, signal=80%
REACTOME_THROMBIN_SIGNALLING_THROUGH_PROTEINASE_ACTIVATED_RECEPTORS_PARS	REACTOME_THROMBIN_SIGNALLING_THROUGH_PROTEINASE_ACTIVATED_RECEPTORS_PARS		28	0.400052	1.23702	0.191153	0.424038	1	2353	tags=21%, list=9%, signal=24%
HALLMARK_COAGULATION	HALLMARK_COAGULATION		115	0.311684	1.23688	0.128041	0.423154	1	6783	tags=31%, list=26%, signal=42%
REACTOME_TRANSPORT_OF_THE_SLBP_DEPENDANT_MATURE_MRNA	REACTOME_TRANSPORT_OF_THE_SLBP_DEPENDANT_MATURE_MRNA		35	0.381644	1.23572	0.196302	0.424491	1	1846	tags=20%, list=7%, signal=22%
REACTOME_CHAPERONE_MEDIATED_AUTOPHAGY	REACTOME_CHAPERONE_MEDIATED_AUTOPHAGY		20	0.427702	1.2352	0.208861	0.424581	1	3968	tags=35%, list=15%, signal=41%
REACTOME_BMAL1_CLOCK_NPAS2_ACTIVATES_CIRCADIAN_GENE_EXPRESSION	REACTOME_BMAL1_CLOCK_NPAS2_ACTIVATES_CIRCADIAN_GENE_EXPRESSION		25	0.403781	1.23412	0.17965	0.425787	1	3811	tags=28%, list=15%, signal=33%
KEGG_ANTIGEN_PROCESSING_AND_PRESENTATION	KEGG_ANTIGEN_PROCESSING_AND_PRESENTATION		64	0.340634	1.23394	0.14986	0.42497	1	7251	tags=44%, list=28%, signal=61%
REACTOME_SIGNALLING_TO_RAS	REACTOME_SIGNALLING_TO_RAS		19	0.441399	1.2337	0.218354	0.424253	1	7450	tags=47%, list=29%, signal=67%
KRAS.AMP.LUNG_UP.V1_DN	KRAS.AMP.LUNG_UP.V1_DN		108	0.316639	1.22934	0.139535	0.433222	1	5367	tags=28%, list=21%, signal=35%
CRX_DN.V1_UP	CRX_DN.V1_UP		112	0.315194	1.22869	0.136897	0.433415	1	6658	tags=32%, list=26%, signal=43%
REACTOME_UNBLOCKING_OF_NMDA_RECEPTORS_GLUTAMATE_BINDING_AND_ACTIVATION	REACTOME_UNBLOCKING_OF_NMDA_RECEPTORS_GLUTAMATE_BINDING_AND_ACTIVATION		21	0.424623	1.22867	0.199377	0.432237	1	940	tags=14%, list=4%, signal=15%
REACTOME_TRAFFICKING_OF_AMPA_RECEPTORS	REACTOME_TRAFFICKING_OF_AMPA_RECEPTORS		29	0.394578	1.22816	0.192488	0.432199	1	1851	tags=14%, list=7%, signal=15%
REACTOME_LISTERIA_MONOCYTOGENES_ENTRY_INTO_HOST_CELLS	REACTOME_LISTERIA_MONOCYTOGENES_ENTRY_INTO_HOST_CELLS		20	0.43049	1.22804	0.199021	0.431243	1	7506	tags=60%, list=29%, signal=85%
REACTOME_ADORA2B_MEDIATED_ANTI_INFLAMMATORY_CYTOKINES_PRODUCTION	REACTOME_ADORA2B_MEDIATED_ANTI_INFLAMMATORY_CYTOKINES_PRODUCTION		95	0.314507	1.22778	0.129751	0.430574	1	3030	tags=18%, list=12%, signal=20%
REACTOME_MRNA_DECAY_BY_5_TO_3_EXORIBONUCLEASE	REACTOME_MRNA_DECAY_BY_5_TO_3_EXORIBONUCLEASE		15	0.459757	1.22594	0.194489	0.433688	1	4508	tags=40%, list=18%, signal=48%
REACTOME_INTRINSIC_PATHWAY_FOR_APOPTOSIS	REACTOME_INTRINSIC_PATHWAY_FOR_APOPTOSIS		53	0.350589	1.22536	0.18169	0.433783	1	6505	tags=38%, list=25%, signal=50%
REACTOME_DEATH_RECEPTOR_SIGNALLING	REACTOME_DEATH_RECEPTOR_SIGNALLING		137	0.300307	1.225	0.127341	0.433383	1	5320	tags=26%, list=21%, signal=32%
MEK_UP.V1_UP	MEK_UP.V1_UP		181	0.294995	1.2244	0.129717	0.433486	1	5145	tags=24%, list=20%, signal=30%
REACTOME_SIGNALING_BY_MODERATE_KINASE_ACTIVITY_BRAF_MUTANTS	REACTOME_SIGNALING_BY_MODERATE_KINASE_ACTIVITY_BRAF_MUTANTS		42	0.362245	1.22146	0.193215	0.439146	1	3937	tags=21%, list=15%, signal=25%
WNT_UP.V1_UP	WNT_UP.V1_UP		149	0.296782	1.22064	0.132754	0.439879	1	6181	tags=30%, list=24%, signal=40%
REACTOME_EXPORT_OF_VIRAL_RIBONUCLEOPROTEINS_FROM_NUCLEUS	REACTOME_EXPORT_OF_VIRAL_RIBONUCLEOPROTEINS_FROM_NUCLEUS		32	0.385185	1.2168	0.182909	0.447909	1	1507	tags=19%, list=6%, signal=20%
REACTOME_FLT3_SIGNALING_IN_DISEASE	REACTOME_FLT3_SIGNALING_IN_DISEASE		28	0.394556	1.21599	0.201587	0.4485	1	6443	tags=50%, list=25%, signal=67%
REACTOME_MAP2K_AND_MAPK_ACTIVATION	REACTOME_MAP2K_AND_MAPK_ACTIVATION		37	0.361413	1.21568	0.206795	0.447938	1	7450	tags=38%, list=29%, signal=53%
REACTOME_RAF_INDEPENDENT_MAPK1_3_ACTIVATION	REACTOME_RAF_INDEPENDENT_MAPK1_3_ACTIVATION		22	0.419562	1.21478	0.206081	0.448973	1	5203	tags=41%, list=20%, signal=51%
REACTOME_SIGNALING_BY_HEDGEHOG	REACTOME_SIGNALING_BY_HEDGEHOG		143	0.295835	1.21371	0.146907	0.450384	1	4980	tags=25%, list=19%, signal=31%
REACTOME_NUCLEAR_ENVELOPE_BREAKDOWN	REACTOME_NUCLEAR_ENVELOPE_BREAKDOWN		52	0.345322	1.21305	0.196275	0.450819	1	1507	tags=17%, list=6%, signal=18%
PRC2_EED_UP.V1_UP	PRC2_EED_UP.V1_UP		156	0.292855	1.21261	0.122549	0.450609	1	3527	tags=17%, list=14%, signal=20%
REACTOME_TRANSCRIPTIONAL_REGULATION_OF_WHITE_ADIPOCYTE_DIFFERENTIATION	REACTOME_TRANSCRIPTIONAL_REGULATION_OF_WHITE_ADIPOCYTE_DIFFERENTIATION		84	0.318481	1.21099	0.163804	0.453282	1	5527	tags=31%, list=22%, signal=39%
REACTOME_SIGNALING_BY_TGF_BETA_RECEPTOR_COMPLEX	REACTOME_SIGNALING_BY_TGF_BETA_RECEPTOR_COMPLEX		72	0.33073	1.21019	0.165738	0.453962	1	3968	tags=28%, list=15%, signal=33%
REACTOME_THROMBOXANE_SIGNALLING_THROUGH_TP_RECEPTOR	REACTOME_THROMBOXANE_SIGNALLING_THROUGH_TP_RECEPTOR		21	0.417164	1.21011	0.230252	0.4529	1	5043	tags=38%, list=20%, signal=47%
REACTOME_SIGNALING_BY_NOTCH3	REACTOME_SIGNALING_BY_NOTCH3		47	0.350676	1.21004	0.198047	0.451846	1	5166	tags=28%, list=20%, signal=35%
REACTOME_TCF_DEPENDENT_SIGNALING_IN_RESPONSE_TO_WNT	REACTOME_TCF_DEPENDENT_SIGNALING_IN_RESPONSE_TO_WNT		163	0.292524	1.20962	0.129697	0.451686	1	6146	tags=36%, list=24%, signal=46%
REACTOME_DISEASES_OF_MITOTIC_CELL_CYCLE	REACTOME_DISEASES_OF_MITOTIC_CELL_CYCLE		38	0.360909	1.20851	0.221037	0.453082	1	3018	tags=21%, list=12%, signal=24%
REACTOME_DISEASES_OF_IMMUNE_SYSTEM	REACTOME_DISEASES_OF_IMMUNE_SYSTEM		28	0.384054	1.20801	0.213376	0.453147	1	6325	tags=46%, list=25%, signal=62%
REACTOME_REGULATION_OF_TLR_BY_ENDOGENOUS_LIGAND	REACTOME_REGULATION_OF_TLR_BY_ENDOGENOUS_LIGAND		16	0.444517	1.20741	0.231975	0.453372	1	8540	tags=56%, list=33%, signal=84%
REACTOME_REGULATION_OF_GLUCOKINASE_BY_GLUCOKINASE_REGULATORY_PROTEIN	REACTOME_REGULATION_OF_GLUCOKINASE_BY_GLUCOKINASE_REGULATORY_PROTEIN		30	0.386079	1.20643	0.217257	0.454633	1	1507	tags=20%, list=6%, signal=21%
REACTOME_HDACS_DEACETYLATE_HISTONES	REACTOME_HDACS_DEACETYLATE_HISTONES		32	0.381405	1.20341	0.215267	0.460619	1	3859	tags=25%, list=15%, signal=29%
REACTOME_SIGNALLING_TO_ERKS	REACTOME_SIGNALLING_TO_ERKS		33	0.373401	1.203	0.199372	0.460358	1	7450	tags=42%, list=29%, signal=60%
REACTOME_DISEASES_OF_SIGNAL_TRANSDUCTION_BY_GROWTH_FACTOR_RECEPTORS_AND_SECOND_MESSENGERS	REACTOME_DISEASES_OF_SIGNAL_TRANSDUCTION_BY_GROWTH_FACTOR_RECEPTORS_AND_SECOND_MESSENGERS		371	0.269365	1.20231	0.0916031	0.460842	1	6224	tags=33%, list=24%, signal=42%
KEGG_SPLICEOSOME	KEGG_SPLICEOSOME		126	0.294058	1.20195	0.14931	0.460646	1	6423	tags=40%, list=25%, signal=54%
REACTOME_POTENTIAL_THERAPEUTICS_FOR_SARS	REACTOME_POTENTIAL_THERAPEUTICS_FOR_SARS		77	0.321778	1.20096	0.182058	0.461897	1	4863	tags=27%, list=19%, signal=34%
REACTOME_FLT3_SIGNALING	REACTOME_FLT3_SIGNALING		38	0.361552	1.20094	0.208272	0.460748	1	6928	tags=45%, list=27%, signal=61%
REACTOME_NEURONAL_SYSTEM	REACTOME_NEURONAL_SYSTEM		353	0.269241	1.20056	0.0914037	0.460417	1	5014	tags=20%, list=20%, signal=25%
KEGG_HYPERTROPHIC_CARDIOMYOPATHY_HCM	KEGG_HYPERTROPHIC_CARDIOMYOPATHY_HCM		71	0.320706	1.19994	0.183562	0.460699	1	6598	tags=38%, list=26%, signal=51%
REACTOME_SYNTHESIS_OF_ACTIVE_UBIQUITIN_ROLES_OF_E1_AND_E2_ENZYMES	REACTOME_SYNTHESIS_OF_ACTIVE_UBIQUITIN_ROLES_OF_E1_AND_E2_ENZYMES		30	0.382153	1.19991	0.217325	0.45954	1	5165	tags=40%, list=20%, signal=50%
KEGG_NEUROACTIVE_LIGAND_RECEPTOR_INTERACTION	KEGG_NEUROACTIVE_LIGAND_RECEPTOR_INTERACTION		198	0.285377	1.19911	0.134615	0.460169	1	6766	tags=27%, list=26%, signal=37%
REACTOME_SIGNALING_BY_NOTCH2	REACTOME_SIGNALING_BY_NOTCH2		33	0.379566	1.19909	0.210687	0.459076	1	5166	tags=27%, list=20%, signal=34%
REACTOME_RAP1_SIGNALLING	REACTOME_RAP1_SIGNALLING		15	0.446715	1.1976	0.246667	0.461371	1	6999	tags=40%, list=27%, signal=55%
REACTOME_INTERLEUKIN_7_SIGNALING	REACTOME_INTERLEUKIN_7_SIGNALING		23	0.401454	1.19745	0.232919	0.460511	1	8104	tags=48%, list=32%, signal=70%
REACTOME_NOTCH3_INTRACELLULAR_DOMAIN_REGULATES_TRANSCRIPTION	REACTOME_NOTCH3_INTRACELLULAR_DOMAIN_REGULATES_TRANSCRIPTION		24	0.400935	1.19455	0.229402	0.466177	1	5961	tags=38%, list=23%, signal=49%
ATF2_S_UP.V1_DN	ATF2_S_UP.V1_DN		163	0.286818	1.19388	0.15119	0.466629	1	4856	tags=23%, list=19%, signal=29%
RAF_UP.V1_DN	RAF_UP.V1_DN		178	0.282718	1.19284	0.146746	0.467991	1	5537	tags=25%, list=22%, signal=31%
ATF2_UP.V1_UP	ATF2_UP.V1_UP		150	0.288876	1.19224	0.144089	0.468338	1	5266	tags=25%, list=20%, signal=31%
KEGG_BLADDER_CANCER	KEGG_BLADDER_CANCER		39	0.364806	1.19119	0.210843	0.469648	1	6746	tags=33%, list=26%, signal=45%
REACTOME_FOXO_MEDIATED_TRANSCRIPTION	REACTOME_FOXO_MEDIATED_TRANSCRIPTION		64	0.332605	1.19003	0.201141	0.471378	1	5682	tags=38%, list=22%, signal=48%
BCAT.100_UP.V1_UP	BCAT.100_UP.V1_UP		43	0.351968	1.18898	0.227666	0.472732	1	8213	tags=44%, list=32%, signal=65%
RB_P130_DN.V1_UP	RB_P130_DN.V1_UP		111	0.299337	1.18646	0.191271	0.477632	1	3979	tags=23%, list=15%, signal=27%
KEGG_NOTCH_SIGNALING_PATHWAY	KEGG_NOTCH_SIGNALING_PATHWAY		46	0.34696	1.18606	0.223837	0.477377	1	6285	tags=37%, list=24%, signal=49%
REACTOME_RHO_GTPASES_ACTIVATE_CIT	REACTOME_RHO_GTPASES_ACTIVATE_CIT		19	0.422444	1.18557	0.243151	0.477373	1	4232	tags=21%, list=16%, signal=25%
REACTOME_INLB_MEDIATED_ENTRY_OF_LISTERIA_MONOCYTOGENES_INTO_HOST_CELL	REACTOME_INLB_MEDIATED_ENTRY_OF_LISTERIA_MONOCYTOGENES_INTO_HOST_CELL		15	0.445671	1.18177	0.25	0.485693	1	4916	tags=47%, list=19%, signal=58%
REACTOME_SIGNALING_BY_NOTCH1_HD_DOMAIN_MUTANTS_IN_CANCER	REACTOME_SIGNALING_BY_NOTCH1_HD_DOMAIN_MUTANTS_IN_CANCER		15	0.443396	1.18152	0.253247	0.485095	1	6443	tags=40%, list=25%, signal=53%
REACTOME_HSF1_ACTIVATION	REACTOME_HSF1_ACTIVATION		28	0.380816	1.18025	0.246951	0.486973	1	6443	tags=46%, list=25%, signal=62%
REACTOME_NOREPINEPHRINE_NEUROTRANSMITTER_RELEASE_CYCLE	REACTOME_NOREPINEPHRINE_NEUROTRANSMITTER_RELEASE_CYCLE		16	0.432064	1.18003	0.257851	0.486249	1	7027	tags=50%, list=27%, signal=69%
HALLMARK_PI3K_AKT_MTOR_SIGNALING	HALLMARK_PI3K_AKT_MTOR_SIGNALING		102	0.2989	1.17858	0.182973	0.488664	1	5239	tags=31%, list=20%, signal=39%
REACTOME_INTERLEUKIN_17_SIGNALING	REACTOME_INTERLEUKIN_17_SIGNALING		70	0.317261	1.178	0.213001	0.48886	1	2930	tags=19%, list=11%, signal=21%
REACTOME_NUCLEAR_IMPORT_OF_REV_PROTEIN	REACTOME_NUCLEAR_IMPORT_OF_REV_PROTEIN		33	0.366982	1.17728	0.222741	0.489504	1	1507	tags=18%, list=6%, signal=19%
KEGG_EPITHELIAL_CELL_SIGNALING_IN_HELICOBACTER_PYLORI_INFECTION	KEGG_EPITHELIAL_CELL_SIGNALING_IN_HELICOBACTER_PYLORI_INFECTION		66	0.322415	1.17681	0.217087	0.489461	1	4823	tags=24%, list=19%, signal=30%
REACTOME_HDMS_DEMETHYLATE_HISTONES	REACTOME_HDMS_DEMETHYLATE_HISTONES		22	0.406977	1.17602	0.246689	0.490227	1	5276	tags=45%, list=21%, signal=57%
KEGG_SYSTEMIC_LUPUS_ERYTHEMATOSUS	KEGG_SYSTEMIC_LUPUS_ERYTHEMATOSUS		51	0.33818	1.17537	0.222222	0.490649	1	7619	tags=37%, list=30%, signal=53%
HOXA9_DN.V1_UP	HOXA9_DN.V1_UP		179	0.281893	1.17474	0.177592	0.491015	1	4608	tags=23%, list=18%, signal=28%
REACTOME_PHASE_0_RAPID_DEPOLARISATION	REACTOME_PHASE_0_RAPID_DEPOLARISATION		27	0.376943	1.1742	0.255627	0.491077	1	3013	tags=26%, list=12%, signal=29%
PRC2_SUZ12_UP.V1_DN	PRC2_SUZ12_UP.V1_DN		147	0.286387	1.1733	0.178616	0.49202	1	2525	tags=14%, list=10%, signal=15%
REACTOME_SIGNALING_BY_FLT3_FUSION_PROTEINS	REACTOME_SIGNALING_BY_FLT3_FUSION_PROTEINS		19	0.406983	1.17321	0.271104	0.491074	1	6347	tags=47%, list=25%, signal=63%
HALLMARK_NOTCH_SIGNALING	HALLMARK_NOTCH_SIGNALING		32	0.364223	1.17277	0.234756	0.490907	1	6285	tags=41%, list=24%, signal=54%
REACTOME_ECM_PROTEOGLYCANS	REACTOME_ECM_PROTEOGLYCANS		70	0.319921	1.17128	0.239888	0.493469	1	6958	tags=43%, list=27%, signal=59%
REACTOME_INTERACTIONS_OF_VPR_WITH_HOST_CELLULAR_PROTEINS	REACTOME_INTERACTIONS_OF_VPR_WITH_HOST_CELLULAR_PROTEINS		36	0.356648	1.16787	0.223358	0.501015	1	1507	tags=17%, list=6%, signal=18%
CORDENONSI_YAP_CONSERVED_SIGNATURE	CORDENONSI_YAP_CONSERVED_SIGNATURE		51	0.340537	1.16786	0.217631	0.499862	1	1280	tags=12%, list=5%, signal=12%
REACTOME_NOTCH2_ACTIVATION_AND_TRANSMISSION_OF_SIGNAL_TO_THE_NUCLEUS	REACTOME_NOTCH2_ACTIVATION_AND_TRANSMISSION_OF_SIGNAL_TO_THE_NUCLEUS		22	0.401951	1.16736	0.261206	0.49998	1	6443	tags=32%, list=25%, signal=42%
REACTOME_RAS_ACTIVATION_UPON_CA2_INFLUX_THROUGH_NMDA_RECEPTOR	REACTOME_RAS_ACTIVATION_UPON_CA2_INFLUX_THROUGH_NMDA_RECEPTOR		20	0.411316	1.16713	0.261147	0.499378	1	940	tags=15%, list=4%, signal=16%
HALLMARK_HEDGEHOG_SIGNALING	HALLMARK_HEDGEHOG_SIGNALING		35	0.35972	1.16543	0.236256	0.502324	1	2751	tags=17%, list=11%, signal=19%
KEGG_AXON_GUIDANCE	KEGG_AXON_GUIDANCE		124	0.288992	1.16403	0.207981	0.5046	1	5604	tags=30%, list=22%, signal=38%
REACTOME_LONG_TERM_POTENTIATION	REACTOME_LONG_TERM_POTENTIATION		23	0.397302	1.16392	0.256281	0.50367	1	940	tags=13%, list=4%, signal=14%
REACTOME_EGFR_DOWNREGULATION	REACTOME_EGFR_DOWNREGULATION		29	0.379035	1.16377	0.252252	0.502879	1	6443	tags=45%, list=25%, signal=60%
REACTOME_DOWNREGULATION_OF_ERBB2_SIGNALING	REACTOME_DOWNREGULATION_OF_ERBB2_SIGNALING		27	0.376722	1.16089	0.261637	0.508627	1	6443	tags=41%, list=25%, signal=54%
REACTOME_TIGHT_JUNCTION_INTERACTIONS	REACTOME_TIGHT_JUNCTION_INTERACTIONS		22	0.397367	1.16069	0.274086	0.507896	1	3979	tags=32%, list=15%, signal=38%
REACTOME_EPH_EPHRIN_SIGNALING	REACTOME_EPH_EPHRIN_SIGNALING		90	0.306604	1.16057	0.224227	0.506997	1	6228	tags=32%, list=24%, signal=42%
REACTOME_RHO_GTPASES_ACTIVATE_PAKS	REACTOME_RHO_GTPASES_ACTIVATE_PAKS		21	0.402332	1.1603	0.255853	0.506457	1	3081	tags=24%, list=12%, signal=27%
REACTOME_AMINE_LIGAND_BINDING_RECEPTORS	REACTOME_AMINE_LIGAND_BINDING_RECEPTORS		22	0.397198	1.16024	0.267974	0.505472	1	5678	tags=27%, list=22%, signal=35%
REACTOME_HCMV_LATE_EVENTS	REACTOME_HCMV_LATE_EVENTS		53	0.333047	1.16015	0.237681	0.504486	1	1725	tags=19%, list=7%, signal=20%
KEGG_CELL_ADHESION_MOLECULES_CAMS	KEGG_CELL_ADHESION_MOLECULES_CAMS		118	0.290336	1.15869	0.201754	0.506983	1	6162	tags=25%, list=24%, signal=33%
REACTOME_P75_NTR_RECEPTOR_MEDIATED_SIGNALLING	REACTOME_P75_NTR_RECEPTOR_MEDIATED_SIGNALLING		94	0.300513	1.15742	0.223958	0.508952	1	2814	tags=16%, list=11%, signal=18%
SRC_UP.V1_DN	SRC_UP.V1_DN		143	0.284259	1.15692	0.188249	0.50909	1	6317	tags=31%, list=25%, signal=41%
REACTOME_INTERACTIONS_OF_REV_WITH_HOST_CELLULAR_PROTEINS	REACTOME_INTERACTIONS_OF_REV_WITH_HOST_CELLULAR_PROTEINS		36	0.351065	1.15415	0.254491	0.514851	1	1507	tags=17%, list=6%, signal=18%
REACTOME_SIGNAL_AMPLIFICATION	REACTOME_SIGNAL_AMPLIFICATION		29	0.372112	1.15412	0.274962	0.513736	1	5043	tags=31%, list=20%, signal=39%
HALLMARK_SPERMATOGENESIS	HALLMARK_SPERMATOGENESIS		105	0.292574	1.15332	0.219287	0.514505	1	8028	tags=40%, list=31%, signal=58%
REACTOME_RHOG_GTPASE_CYCLE	REACTOME_RHOG_GTPASE_CYCLE		72	0.310676	1.15329	0.230769	0.51344	1	6921	tags=38%, list=27%, signal=51%
REACTOME_SUMOYLATION_OF_RNA_BINDING_PROTEINS	REACTOME_SUMOYLATION_OF_RNA_BINDING_PROTEINS		46	0.335156	1.15308	0.251089	0.512689	1	2913	tags=24%, list=11%, signal=27%
REACTOME_TRANSPORT_OF_MATURE_MRNAS_DERIVED_FROM_INTRONLESS_TRANSCRIPTS	REACTOME_TRANSPORT_OF_MATURE_MRNAS_DERIVED_FROM_INTRONLESS_TRANSCRIPTS		42	0.343532	1.15073	0.245255	0.517211	1	1846	tags=19%, list=7%, signal=20%
KEGG_AMYOTROPHIC_LATERAL_SCLEROSIS_ALS	KEGG_AMYOTROPHIC_LATERAL_SCLEROSIS_ALS		51	0.328372	1.14953	0.257143	0.519058	1	6243	tags=29%, list=24%, signal=39%
CAMP_UP.V1_DN	CAMP_UP.V1_DN		193	0.270692	1.1495	0.2007	0.517952	1	3391	tags=17%, list=13%, signal=20%
KEGG_CARDIAC_MUSCLE_CONTRACTION	KEGG_CARDIAC_MUSCLE_CONTRACTION		61	0.328384	1.14748	0.252454	0.521846	1	6556	tags=34%, list=26%, signal=46%
REACTOME_TNF_RECEPTOR_SUPERFAMILY_TNFSF_MEMBERS_MEDIATING_NON_CANONICAL_NF_KB_PATHWAY	REACTOME_TNF_RECEPTOR_SUPERFAMILY_TNFSF_MEMBERS_MEDIATING_NON_CANONICAL_NF_KB_PATHWAY		16	0.429839	1.14604	0.311337	0.524289	1	6662	tags=44%, list=26%, signal=59%
REACTOME_NS1_MEDIATED_EFFECTS_ON_HOST_PATHWAYS	REACTOME_NS1_MEDIATED_EFFECTS_ON_HOST_PATHWAYS		39	0.34085	1.14017	0.260492	0.538109	1	3091	tags=23%, list=12%, signal=26%
REACTOME_NRIF_SIGNALS_CELL_DEATH_FROM_THE_NUCLEUS	REACTOME_NRIF_SIGNALS_CELL_DEATH_FROM_THE_NUCLEUS		15	0.421508	1.13925	0.308998	0.539246	1	6905	tags=40%, list=27%, signal=55%
E2F3_UP.V1_UP	E2F3_UP.V1_UP		174	0.271075	1.13759	0.225301	0.542291	1	4014	tags=17%, list=16%, signal=20%
NRL_DN.V1_UP	NRL_DN.V1_UP		121	0.283091	1.13682	0.23221	0.543051	1	6531	tags=33%, list=25%, signal=44%
REACTOME_SIGNALING_BY_NTRKS	REACTOME_SIGNALING_BY_NTRKS		131	0.282502	1.13565	0.240458	0.544766	1	2885	tags=17%, list=11%, signal=19%
REACTOME_INITIATION_OF_NUCLEAR_ENVELOPE_NE_REFORMATION	REACTOME_INITIATION_OF_NUCLEAR_ENVELOPE_NE_REFORMATION		19	0.402465	1.13519	0.306452	0.544784	1	2816	tags=26%, list=11%, signal=30%
REACTOME_GLUCAGON_LIKE_PEPTIDE_1_GLP1_REGULATES_INSULIN_SECRETION	REACTOME_GLUCAGON_LIKE_PEPTIDE_1_GLP1_REGULATES_INSULIN_SECRETION		35	0.346365	1.1348	0.300752	0.544605	1	2353	tags=17%, list=9%, signal=19%
CAHOY_NEURONAL	CAHOY_NEURONAL		82	0.303642	1.1339	0.261518	0.545707	1	4564	tags=23%, list=18%, signal=28%
REACTOME_G_BETA_GAMMA_SIGNALLING_THROUGH_CDC42	REACTOME_G_BETA_GAMMA_SIGNALLING_THROUGH_CDC42		17	0.408239	1.13362	0.275124	0.545216	1	4774	tags=35%, list=19%, signal=43%
NOTCH_DN.V1_DN	NOTCH_DN.V1_DN		148	0.278712	1.13344	0.247219	0.544451	1	5916	tags=29%, list=23%, signal=38%
ESC_V6.5_UP_LATE.V1_UP	ESC_V6.5_UP_LATE.V1_UP		150	0.273504	1.13263	0.235941	0.545347	1	3718	tags=17%, list=14%, signal=20%
REACTOME_M_PHASE	REACTOME_M_PHASE		342	0.256587	1.13233	0.191111	0.544909	1	4993	tags=25%, list=19%, signal=30%
REACTOME_TRANSCRIPTIONAL_ACTIVITY_OF_SMAD2_SMAD3_SMAD4_HETEROTRIMER	REACTOME_TRANSCRIPTIONAL_ACTIVITY_OF_SMAD2_SMAD3_SMAD4_HETEROTRIMER		43	0.333916	1.13204	0.271917	0.544441	1	3968	tags=28%, list=15%, signal=33%
REACTOME_HIV_LIFE_CYCLE	REACTOME_HIV_LIFE_CYCLE		144	0.277486	1.12994	0.239752	0.548638	1	4908	tags=27%, list=19%, signal=33%
REACTOME_MITOTIC_PROPHASE	REACTOME_MITOTIC_PROPHASE		80	0.297253	1.12962	0.25672	0.548313	1	1507	tags=15%, list=6%, signal=16%
REACTOME_TNF_SIGNALING	REACTOME_TNF_SIGNALING		43	0.339654	1.12909	0.295154	0.54849	1	6662	tags=42%, list=26%, signal=56%
REACTOME_RECYCLING_PATHWAY_OF_L1	REACTOME_RECYCLING_PATHWAY_OF_L1		44	0.335535	1.12702	0.275466	0.552634	1	4335	tags=20%, list=17%, signal=25%
REACTOME_NEPHRIN_FAMILY_INTERACTIONS	REACTOME_NEPHRIN_FAMILY_INTERACTIONS		21	0.394464	1.12685	0.279935	0.551924	1	4341	tags=29%, list=17%, signal=34%
REACTOME_RAB_GEFS_EXCHANGE_GTP_FOR_GDP_ON_RABS	REACTOME_RAB_GEFS_EXCHANGE_GTP_FOR_GDP_ON_RABS		89	0.293042	1.12605	0.258732	0.552901	1	5288	tags=28%, list=21%, signal=35%
REACTOME_CELL_CYCLE_MITOTIC	REACTOME_CELL_CYCLE_MITOTIC		486	0.249967	1.12501	0.177215	0.554247	1	4993	tags=23%, list=19%, signal=28%
REACTOME_INTEGRIN_CELL_SURFACE_INTERACTIONS	REACTOME_INTEGRIN_CELL_SURFACE_INTERACTIONS		79	0.300028	1.12501	0.27923	0.553062	1	8615	tags=48%, list=34%, signal=72%
PDGF_UP.V1_UP	PDGF_UP.V1_UP		138	0.276447	1.12459	0.231902	0.552947	1	5305	tags=30%, list=21%, signal=37%
REACTOME_RHOB_GTPASE_CYCLE	REACTOME_RHOB_GTPASE_CYCLE		67	0.303597	1.12441	0.247967	0.552218	1	5215	tags=27%, list=20%, signal=34%
REACTOME_G_PROTEIN_ACTIVATION	REACTOME_G_PROTEIN_ACTIVATION		20	0.389997	1.12435	0.312013	0.551192	1	5043	tags=35%, list=20%, signal=44%
NFE2L2.V2	NFE2L2.V2		384	0.251346	1.12385	0.204301	0.551331	1	3819	tags=16%, list=15%, signal=18%
REACTOME_DOWNREGULATION_OF_TGF_BETA_RECEPTOR_SIGNALING	REACTOME_DOWNREGULATION_OF_TGF_BETA_RECEPTOR_SIGNALING		26	0.371231	1.12257	0.313846	0.55345	1	3968	tags=27%, list=15%, signal=32%
REACTOME_NEGATIVE_REGULATION_OF_FGFR4_SIGNALING	REACTOME_NEGATIVE_REGULATION_OF_FGFR4_SIGNALING		25	0.37617	1.12176	0.28811	0.554477	1	7652	tags=48%, list=30%, signal=68%
REACTOME_TP53_REGULATES_TRANSCRIPTION_OF_GENES_INVOLVED_IN_CYTOCHROME_C_RELEASE	REACTOME_TP53_REGULATES_TRANSCRIPTION_OF_GENES_INVOLVED_IN_CYTOCHROME_C_RELEASE		20	0.396244	1.12165	0.319008	0.553588	1	3924	tags=30%, list=15%, signal=35%
REACTOME_PLATELET_HOMEOSTASIS	REACTOME_PLATELET_HOMEOSTASIS		77	0.296477	1.12003	0.267207	0.556552	1	3691	tags=21%, list=14%, signal=24%
REACTOME_THE_PHOTOTRANSDUCTION_CASCADE	REACTOME_THE_PHOTOTRANSDUCTION_CASCADE		29	0.354772	1.12	0.283255	0.555482	1	7182	tags=41%, list=28%, signal=57%
REACTOME_GLUTAMATE_NEUROTRANSMITTER_RELEASE_CYCLE	REACTOME_GLUTAMATE_NEUROTRANSMITTER_RELEASE_CYCLE		21	0.387842	1.11998	0.298869	0.55436	1	7027	tags=48%, list=27%, signal=65%
MEL18_DN.V1_UP	MEL18_DN.V1_UP		132	0.275644	1.11886	0.26875	0.556139	1	6326	tags=27%, list=25%, signal=36%
REACTOME_SIGNALING_BY_EGFR	REACTOME_SIGNALING_BY_EGFR		47	0.334811	1.1177	0.29142	0.557824	1	6443	tags=40%, list=25%, signal=54%
REACTOME_TRNA_PROCESSING_IN_THE_NUCLEUS	REACTOME_TRNA_PROCESSING_IN_THE_NUCLEUS		57	0.312515	1.11764	0.297297	0.5568	1	1994	tags=18%, list=8%, signal=19%
REACTOME_SIGNALING_BY_FGFR1_IN_DISEASE	REACTOME_SIGNALING_BY_FGFR1_IN_DISEASE		32	0.358604	1.11601	0.291339	0.559985	1	6427	tags=41%, list=25%, signal=54%
HALLMARK_MITOTIC_SPINDLE	HALLMARK_MITOTIC_SPINDLE		198	0.263211	1.1151	0.249708	0.561051	1	5353	tags=23%, list=21%, signal=29%
REACTOME_NEGATIVE_REGULATION_OF_THE_PI3K_AKT_NETWORK	REACTOME_NEGATIVE_REGULATION_OF_THE_PI3K_AKT_NETWORK		103	0.286221	1.11469	0.257982	0.560945	1	7652	tags=37%, list=30%, signal=52%
REACTOME_RND2_GTPASE_CYCLE	REACTOME_RND2_GTPASE_CYCLE		42	0.331501	1.11377	0.29745	0.56215	1	4292	tags=24%, list=17%, signal=29%
REACTOME_FACTORS_INVOLVED_IN_MEGAKARYOCYTE_DEVELOPMENT_AND_PLATELET_PRODUCTION	REACTOME_FACTORS_INVOLVED_IN_MEGAKARYOCYTE_DEVELOPMENT_AND_PLATELET_PRODUCTION		131	0.275002	1.11373	0.259304	0.561085	1	4487	tags=21%, list=17%, signal=26%
PTEN_DN.V2_UP	PTEN_DN.V2_UP		117	0.27804	1.11113	0.278416	0.566592	1	5736	tags=27%, list=22%, signal=35%
REACTOME_ANTIGEN_ACTIVATES_B_CELL_RECEPTOR_BCR_LEADING_TO_GENERATION_OF_SECOND_MESSENGERS	REACTOME_ANTIGEN_ACTIVATES_B_CELL_RECEPTOR_BCR_LEADING_TO_GENERATION_OF_SECOND_MESSENGERS		86	0.291715	1.11068	0.295515	0.566539	1	9388	tags=64%, list=37%, signal=100%
REACTOME_PTEN_REGULATION	REACTOME_PTEN_REGULATION		137	0.272967	1.10787	0.286935	0.572508	1	5439	tags=31%, list=21%, signal=40%
REACTOME_INTERLEUKIN_20_FAMILY_SIGNALING	REACTOME_INTERLEUKIN_20_FAMILY_SIGNALING		19	0.394998	1.10761	0.327815	0.571984	1	7979	tags=53%, list=31%, signal=76%
REACTOME_PD_1_SIGNALING	REACTOME_PD_1_SIGNALING		22	0.376299	1.10656	0.318542	0.57366	1	7738	tags=55%, list=30%, signal=78%
IL2_UP.V1_DN	IL2_UP.V1_DN		155	0.270154	1.1049	0.28323	0.576949	1	3682	tags=15%, list=14%, signal=17%
REACTOME_INTRACELLULAR_SIGNALING_BY_SECOND_MESSENGERS	REACTOME_INTRACELLULAR_SIGNALING_BY_SECOND_MESSENGERS		293	0.249601	1.10393	0.261504	0.57829	1	5010	tags=25%, list=19%, signal=30%
REACTOME_NUCLEAR_PORE_COMPLEX_NPC_DISASSEMBLY	REACTOME_NUCLEAR_PORE_COMPLEX_NPC_DISASSEMBLY		35	0.343071	1.10168	0.325337	0.582915	1	1507	tags=17%, list=6%, signal=18%
P53_DN.V2_DN	P53_DN.V2_DN		129	0.272698	1.09813	0.290323	0.59102	1	2800	tags=16%, list=11%, signal=17%
KEGG_PARKINSONS_DISEASE	KEGG_PARKINSONS_DISEASE		107	0.281233	1.09798	0.307206	0.590234	1	7025	tags=38%, list=27%, signal=53%
REACTOME_NICOTINAMIDE_SALVAGING	REACTOME_NICOTINAMIDE_SALVAGING		15	0.408814	1.09714	0.344426	0.591284	1	1191	tags=20%, list=5%, signal=21%
SIRNA_EIF4GI_DN	SIRNA_EIF4GI_DN		87	0.287123	1.094	0.317105	0.59814	1	4586	tags=22%, list=18%, signal=26%
PRC1_BMI_UP.V1_DN	PRC1_BMI_UP.V1_DN		134	0.268838	1.09295	0.317284	0.599656	1	4576	tags=22%, list=18%, signal=26%
REACTOME_SIGNALING_BY_NTRK2_TRKB	REACTOME_SIGNALING_BY_NTRK2_TRKB		25	0.367157	1.09278	0.327448	0.598889	1	8417	tags=52%, list=33%, signal=77%
KEGG_PATHWAYS_IN_CANCER	KEGG_PATHWAYS_IN_CANCER		301	0.250067	1.09078	0.283649	0.603088	1	7449	tags=33%, list=29%, signal=46%
REACTOME_EPH_EPHRIN_MEDIATED_REPULSION_OF_CELLS	REACTOME_EPH_EPHRIN_MEDIATED_REPULSION_OF_CELLS		49	0.317298	1.08932	0.327988	0.605638	1	6228	tags=29%, list=24%, signal=38%
KEGG_OOCYTE_MEIOSIS	KEGG_OOCYTE_MEIOSIS		103	0.279302	1.08861	0.322078	0.606288	1	2893	tags=17%, list=11%, signal=19%
REACTOME_EPHA_MEDIATED_GROWTH_CONE_COLLAPSE	REACTOME_EPHA_MEDIATED_GROWTH_CONE_COLLAPSE		28	0.352721	1.08757	0.345185	0.607909	1	4981	tags=39%, list=19%, signal=49%
REACTOME_FCGAMMA_RECEPTOR_FCGR_DEPENDENT_PHAGOCYTOSIS	REACTOME_FCGAMMA_RECEPTOR_FCGR_DEPENDENT_PHAGOCYTOSIS		143	0.269745	1.08531	0.307503	0.612677	1	7791	tags=41%, list=30%, signal=59%
REACTOME_FRS_MEDIATED_FGFR1_SIGNALING	REACTOME_FRS_MEDIATED_FGFR1_SIGNALING		17	0.387715	1.08361	0.350254	0.615873	1	6347	tags=35%, list=25%, signal=47%
REACTOME_ADP_SIGNALLING_THROUGH_P2Y_PURINOCEPTOR_12	REACTOME_ADP_SIGNALLING_THROUGH_P2Y_PURINOCEPTOR_12		18	0.392208	1.08337	0.369637	0.615295	1	2353	tags=22%, list=9%, signal=24%
REACTOME_CASPASE_ACTIVATION_VIA_EXTRINSIC_APOPTOTIC_SIGNALLING_PATHWAY	REACTOME_CASPASE_ACTIVATION_VIA_EXTRINSIC_APOPTOTIC_SIGNALLING_PATHWAY		26	0.358258	1.08272	0.357143	0.615847	1	7449	tags=42%, list=29%, signal=60%
CRX_NRL_DN.V1_DN	CRX_NRL_DN.V1_DN		106	0.275434	1.08258	0.312977	0.614989	1	5143	tags=25%, list=20%, signal=32%
REACTOME_REGULATION_OF_GENE_EXPRESSION_IN_LATE_STAGE_BRANCHING_MORPHOGENESIS_PANCREATIC_BUD_PRECURSOR_CELLS	REACTOME_REGULATION_OF_GENE_EXPRESSION_IN_LATE_STAGE_BRANCHING_MORPHOGENESIS_PANCREATIC_BUD_PRECURSOR_CELLS		16	0.393077	1.08115	0.363487	0.617544	1	2844	tags=25%, list=11%, signal=28%
KEGG_PRION_DISEASES	KEGG_PRION_DISEASES		31	0.340914	1.07967	0.359327	0.620223	1	2849	tags=13%, list=11%, signal=14%
REACTOME_DEPOLYMERISATION_OF_THE_NUCLEAR_LAMINA	REACTOME_DEPOLYMERISATION_OF_THE_NUCLEAR_LAMINA		15	0.401916	1.07612	0.352137	0.628472	1	7182	tags=47%, list=28%, signal=65%
KEGG_NITROGEN_METABOLISM	KEGG_NITROGEN_METABOLISM		21	0.374128	1.0718	0.386688	0.638658	1	8300	tags=52%, list=32%, signal=77%
KEGG_GLYCOSPHINGOLIPID_BIOSYNTHESIS_GANGLIO_SERIES	KEGG_GLYCOSPHINGOLIPID_BIOSYNTHESIS_GANGLIO_SERIES		15	0.396161	1.06899	0.377517	0.644761	1	644	tags=13%, list=3%, signal=14%
KEGG_CALCIUM_SIGNALING_PATHWAY	KEGG_CALCIUM_SIGNALING_PATHWAY		157	0.259368	1.06536	0.330488	0.653583	1	5802	tags=24%, list=23%, signal=30%
REACTOME_PI3K_AKT_SIGNALING_IN_CANCER	REACTOME_PI3K_AKT_SIGNALING_IN_CANCER		96	0.277978	1.06511	0.352638	0.652993	1	7652	tags=38%, list=30%, signal=53%
REACTOME_BUDDING_AND_MATURATION_OF_HIV_VIRION	REACTOME_BUDDING_AND_MATURATION_OF_HIV_VIRION		28	0.342478	1.06413	0.385307	0.654452	1	4342	tags=29%, list=17%, signal=34%
KRAS.LUNG_UP.V1_DN	KRAS.LUNG_UP.V1_DN		102	0.274225	1.06233	0.35733	0.658102	1	6236	tags=27%, list=24%, signal=36%
REACTOME_REGULATED_NECROSIS	REACTOME_REGULATED_NECROSIS		55	0.300925	1.06178	0.357955	0.658276	1	4672	tags=25%, list=18%, signal=31%
CAHOY_ASTROCYTIC	CAHOY_ASTROCYTIC		91	0.27476	1.06098	0.35854	0.65915	1	2378	tags=13%, list=9%, signal=14%
REACTOME_COSTIMULATION_BY_THE_CD28_FAMILY	REACTOME_COSTIMULATION_BY_THE_CD28_FAMILY		68	0.293378	1.06034	0.380054	0.659485	1	7475	tags=44%, list=29%, signal=62%
REACTOME_SIGNALING_BY_SCF_KIT	REACTOME_SIGNALING_BY_SCF_KIT		42	0.317947	1.06031	0.369565	0.658298	1	7450	tags=43%, list=29%, signal=60%
REACTOME_FCERI_MEDIATED_CA_2_MOBILIZATION	REACTOME_FCERI_MEDIATED_CA_2_MOBILIZATION		86	0.279779	1.05978	0.367454	0.658478	1	9388	tags=65%, list=37%, signal=102%
REACTOME_HCMV_INFECTION	REACTOME_HCMV_INFECTION		95	0.275393	1.0593	0.359684	0.658461	1	1783	tags=14%, list=7%, signal=15%
REACTOME_FORMATION_OF_RNA_POL_II_ELONGATION_COMPLEX	REACTOME_FORMATION_OF_RNA_POL_II_ELONGATION_COMPLEX		54	0.301296	1.05858	0.382069	0.659179	1	5693	tags=35%, list=22%, signal=45%
REACTOME_CONVERSION_FROM_APC_C_CDC20_TO_APC_C_CDH1_IN_LATE_ANAPHASE	REACTOME_CONVERSION_FROM_APC_C_CDC20_TO_APC_C_CDH1_IN_LATE_ANAPHASE		20	0.367834	1.05858	0.404984	0.657927	1	3018	tags=25%, list=12%, signal=28%
REACTOME_ION_TRANSPORT_BY_P_TYPE_ATPASES	REACTOME_ION_TRANSPORT_BY_P_TYPE_ATPASES		48	0.305933	1.05852	0.356028	0.656835	1	3691	tags=21%, list=14%, signal=24%
KEGG_FOCAL_ADHESION	KEGG_FOCAL_ADHESION		190	0.250255	1.05799	0.336538	0.657113	1	7182	tags=33%, list=28%, signal=46%
RB_P107_DN.V1_UP	RB_P107_DN.V1_UP		122	0.268414	1.05519	0.395031	0.663426	1	5776	tags=26%, list=22%, signal=34%
REACTOME_OXIDATIVE_STRESS_INDUCED_SENESCENCE	REACTOME_OXIDATIVE_STRESS_INDUCED_SENESCENCE		65	0.291893	1.05508	0.39087	0.662503	1	6864	tags=31%, list=27%, signal=42%
REACTOME_NEGATIVE_REGULATION_OF_FGFR3_SIGNALING	REACTOME_NEGATIVE_REGULATION_OF_FGFR3_SIGNALING		25	0.353295	1.05489	0.391162	0.661768	1	7652	tags=44%, list=30%, signal=63%
REACTOME_VISUAL_PHOTOTRANSDUCTION	REACTOME_VISUAL_PHOTOTRANSDUCTION		74	0.287156	1.05456	0.395804	0.66141	1	7473	tags=38%, list=29%, signal=53%
JAK2_DN.V1_UP	JAK2_DN.V1_UP		122	0.266525	1.05306	0.365482	0.664135	1	6199	tags=24%, list=24%, signal=31%
REACTOME_SIGNALING_BY_FGFR4	REACTOME_SIGNALING_BY_FGFR4		35	0.32193	1.05281	0.400593	0.663564	1	7652	tags=43%, list=30%, signal=61%
REACTOME_ANTIGEN_PROCESSING_UBIQUITINATION_PROTEASOME_DEGRADATION	REACTOME_ANTIGEN_PROCESSING_UBIQUITINATION_PROTEASOME_DEGRADATION		296	0.239237	1.05206	0.352679	0.664302	1	4700	tags=27%, list=18%, signal=32%
ALK_DN.V1_DN	ALK_DN.V1_DN		108	0.266824	1.0508	0.36076	0.666415	1	4649	tags=23%, list=18%, signal=28%
REACTOME_HIV_ELONGATION_ARREST_AND_RECOVERY	REACTOME_HIV_ELONGATION_ARREST_AND_RECOVERY		29	0.335136	1.05007	0.395652	0.667163	1	5466	tags=38%, list=21%, signal=48%
REACTOME_MAP3K8_TPL2_DEPENDENT_MAPK1_3_ACTIVATION	REACTOME_MAP3K8_TPL2_DEPENDENT_MAPK1_3_ACTIVATION		16	0.3864	1.04971	0.399015	0.666858	1	166	tags=13%, list=1%, signal=13%
CTIP_DN.V1_DN	CTIP_DN.V1_DN		104	0.269368	1.04877	0.362595	0.668171	1	5257	tags=24%, list=20%, signal=30%
REACTOME_METABOLISM_OF_STEROID_HORMONES	REACTOME_METABOLISM_OF_STEROID_HORMONES		27	0.33731	1.04622	0.408951	0.673867	1	3087	tags=19%, list=12%, signal=21%
HALLMARK_ANGIOGENESIS	HALLMARK_ANGIOGENESIS		35	0.319292	1.04617	0.381988	0.672777	1	3395	tags=17%, list=13%, signal=20%
KEGG_ECM_RECEPTOR_INTERACTION	KEGG_ECM_RECEPTOR_INTERACTION		82	0.275403	1.0457	0.384817	0.672702	1	7086	tags=35%, list=28%, signal=49%
BRCA1_DN.V1_UP	BRCA1_DN.V1_UP		93	0.274217	1.04363	0.384106	0.677034	1	3498	tags=15%, list=14%, signal=17%
KEGG_REGULATION_OF_ACTIN_CYTOSKELETON	KEGG_REGULATION_OF_ACTIN_CYTOSKELETON		193	0.246191	1.04112	0.381995	0.682549	1	5286	tags=22%, list=21%, signal=28%
PGF_UP.V1_DN	PGF_UP.V1_DN		159	0.25366	1.03963	0.39199	0.685115	1	3546	tags=16%, list=14%, signal=19%
REACTOME_NUCLEAR_ENVELOPE_NE_REASSEMBLY	REACTOME_NUCLEAR_ENVELOPE_NE_REASSEMBLY		72	0.277266	1.03915	0.416667	0.685127	1	4342	tags=22%, list=17%, signal=27%
HALLMARK_APICAL_JUNCTION	HALLMARK_APICAL_JUNCTION		177	0.247967	1.03861	0.394988	0.68539	1	6832	tags=29%, list=27%, signal=39%
REACTOME_RAB_REGULATION_OF_TRAFFICKING	REACTOME_RAB_REGULATION_OF_TRAFFICKING		121	0.261152	1.03737	0.389313	0.687489	1	5288	tags=26%, list=21%, signal=33%
KEGG_ENDOCYTOSIS	KEGG_ENDOCYTOSIS		175	0.245968	1.03663	0.389563	0.688211	1	4342	tags=19%, list=17%, signal=23%
REACTOME_PROCESSING_OF_CAPPED_INTRON_CONTAINING_PRE_MRNA	REACTOME_PROCESSING_OF_CAPPED_INTRON_CONTAINING_PRE_MRNA		240	0.241193	1.03654	0.406074	0.687193	1	5917	tags=30%, list=23%, signal=39%
REACTOME_ENDOSOMAL_SORTING_COMPLEX_REQUIRED_FOR_TRANSPORT_ESCRT	REACTOME_ENDOSOMAL_SORTING_COMPLEX_REQUIRED_FOR_TRANSPORT_ESCRT		31	0.334352	1.03613	0.388889	0.687055	1	4342	tags=29%, list=17%, signal=35%
ESC_V6.5_UP_LATE.V1_DN	ESC_V6.5_UP_LATE.V1_DN		156	0.245295	1.03503	0.381127	0.688637	1	5504	tags=24%, list=21%, signal=30%
REACTOME_PROCESSING_OF_DNA_DOUBLE_STRAND_BREAK_ENDS	REACTOME_PROCESSING_OF_DNA_DOUBLE_STRAND_BREAK_ENDS		60	0.287414	1.03393	0.385049	0.690298	1	6692	tags=40%, list=26%, signal=54%
REACTOME_METABOLIC_DISORDERS_OF_BIOLOGICAL_OXIDATION_ENZYMES	REACTOME_METABOLIC_DISORDERS_OF_BIOLOGICAL_OXIDATION_ENZYMES		25	0.344837	1.03306	0.401945	0.691343	1	2538	tags=20%, list=10%, signal=22%
KEGG_GNRH_SIGNALING_PATHWAY	KEGG_GNRH_SIGNALING_PATHWAY		88	0.270514	1.03279	0.410923	0.690861	1	4534	tags=20%, list=18%, signal=25%
REACTOME_ASSEMBLY_AND_CELL_SURFACE_PRESENTATION_OF_NMDA_RECEPTORS	REACTOME_ASSEMBLY_AND_CELL_SURFACE_PRESENTATION_OF_NMDA_RECEPTORS		39	0.312856	1.03165	0.419118	0.692708	1	4012	tags=15%, list=16%, signal=18%
REACTOME_PERK_REGULATES_GENE_EXPRESSION	REACTOME_PERK_REGULATES_GENE_EXPRESSION		32	0.327358	1.03137	0.419152	0.692181	1	2757	tags=25%, list=11%, signal=28%
REACTOME_O_LINKED_GLYCOSYLATION_OF_MUCINS	REACTOME_O_LINKED_GLYCOSYLATION_OF_MUCINS		56	0.288959	1.03131	0.411932	0.691084	1	4385	tags=21%, list=17%, signal=26%
KEGG_DILATED_CARDIOMYOPATHY	KEGG_DILATED_CARDIOMYOPATHY		77	0.274766	1.03103	0.414702	0.690578	1	5320	tags=26%, list=21%, signal=33%
REACTOME_HCMV_EARLY_EVENTS	REACTOME_HCMV_EARLY_EVENTS		71	0.279172	1.02972	0.421123	0.69269	1	1783	tags=13%, list=7%, signal=14%
REACTOME_MRNA_SPLICING	REACTOME_MRNA_SPLICING		187	0.242557	1.02899	0.415783	0.693291	1	5917	tags=32%, list=23%, signal=41%
PKCA_DN.V1_DN	PKCA_DN.V1_DN		129	0.256648	1.02888	0.414752	0.692349	1	4577	tags=22%, list=18%, signal=27%
REACTOME_TRANSCRIPTIONAL_REGULATION_BY_MECP2	REACTOME_TRANSCRIPTIONAL_REGULATION_BY_MECP2		59	0.286853	1.02882	0.408219	0.69127	1	7038	tags=37%, list=27%, signal=51%
REACTOME_PLATELET_ACTIVATION_SIGNALING_AND_AGGREGATION	REACTOME_PLATELET_ACTIVATION_SIGNALING_AND_AGGREGATION		236	0.23858	1.02583	0.429714	0.697964	1	5595	tags=25%, list=22%, signal=31%
REACTOME_TRANSMISSION_ACROSS_CHEMICAL_SYNAPSES	REACTOME_TRANSMISSION_ACROSS_CHEMICAL_SYNAPSES		234	0.238621	1.0254	0.404378	0.697883	1	4995	tags=19%, list=19%, signal=23%
REACTOME_CELL_SURFACE_INTERACTIONS_AT_THE_VASCULAR_WALL	REACTOME_CELL_SURFACE_INTERACTIONS_AT_THE_VASCULAR_WALL		181	0.242433	1.02486	0.411695	0.698126	1	9388	tags=51%, list=37%, signal=80%
REACTOME_SURFACTANT_METABOLISM	REACTOME_SURFACTANT_METABOLISM		24	0.34261	1.02424	0.407752	0.698652	1	5566	tags=33%, list=22%, signal=43%
HALLMARK_APICAL_SURFACE	HALLMARK_APICAL_SURFACE		40	0.311148	1.02382	0.416905	0.698536	1	6353	tags=38%, list=25%, signal=50%
REACTOME_DEREGULATED_CDK5_TRIGGERS_MULTIPLE_NEURODEGENERATIVE_PATHWAYS_IN_ALZHEIMER_S_DISEASE_MODELS	REACTOME_DEREGULATED_CDK5_TRIGGERS_MULTIPLE_NEURODEGENERATIVE_PATHWAYS_IN_ALZHEIMER_S_DISEASE_MODELS		22	0.351813	1.0234	0.428115	0.698379	1	5489	tags=32%, list=21%, signal=40%
KEGG_TGF_BETA_SIGNALING_PATHWAY	KEGG_TGF_BETA_SIGNALING_PATHWAY		82	0.269834	1.02299	0.396887	0.698232	1	6183	tags=28%, list=24%, signal=37%
REACTOME_TRP_CHANNELS	REACTOME_TRP_CHANNELS		25	0.34713	1.02257	0.440262	0.698213	1	4533	tags=24%, list=18%, signal=29%
ATM_DN.V1_DN	ATM_DN.V1_DN		113	0.258169	1.02101	0.445283	0.701027	1	5967	tags=28%, list=23%, signal=37%
KEGG_ACUTE_MYELOID_LEUKEMIA	KEGG_ACUTE_MYELOID_LEUKEMIA		57	0.290295	1.01963	0.434211	0.703358	1	6347	tags=32%, list=25%, signal=42%
REACTOME_SUMOYLATION_OF_DNA_REPLICATION_PROTEINS	REACTOME_SUMOYLATION_OF_DNA_REPLICATION_PROTEINS		45	0.299947	1.01938	0.436556	0.702754	1	2913	tags=20%, list=11%, signal=23%
REACTOME_CELL_CELL_COMMUNICATION	REACTOME_CELL_CELL_COMMUNICATION		110	0.261025	1.01849	0.431242	0.703912	1	7676	tags=40%, list=30%, signal=57%
REACTOME_PEPTIDE_HORMONE_METABOLISM	REACTOME_PEPTIDE_HORMONE_METABOLISM		67	0.281705	1.01837	0.414734	0.703007	1	462	tags=3%, list=2%, signal=3%
REACTOME_POST_TRANSLATIONAL_MODIFICATION_SYNTHESIS_OF_GPI_ANCHORED_PROTEINS	REACTOME_POST_TRANSLATIONAL_MODIFICATION_SYNTHESIS_OF_GPI_ANCHORED_PROTEINS		73	0.27665	1.01822	0.442667	0.702153	1	6912	tags=32%, list=27%, signal=43%
REACTOME_METABOLISM_OF_NITRIC_OXIDE_NOS3_ACTIVATION_AND_REGULATION	REACTOME_METABOLISM_OF_NITRIC_OXIDE_NOS3_ACTIVATION_AND_REGULATION		15	0.398815	1.01768	0.438907	0.702405	1	8648	tags=53%, list=34%, signal=80%
REACTOME_PROTEIN_FOLDING	REACTOME_PROTEIN_FOLDING		92	0.265708	1.01674	0.449742	0.70368	1	5754	tags=30%, list=22%, signal=39%
BCAT_BILD_ET_AL_DN	BCAT_BILD_ET_AL_DN		45	0.303001	1.01659	0.422741	0.702832	1	6287	tags=36%, list=24%, signal=47%
REACTOME_REGULATION_OF_INSULIN_SECRETION	REACTOME_REGULATION_OF_INSULIN_SECRETION		68	0.273948	1.01526	0.423639	0.705107	1	5043	tags=24%, list=20%, signal=29%
KEGG_LEUKOCYTE_TRANSENDOTHELIAL_MIGRATION	KEGG_LEUKOCYTE_TRANSENDOTHELIAL_MIGRATION		106	0.257124	1.01461	0.428753	0.705557	1	6387	tags=26%, list=25%, signal=35%
REACTOME_ENERGY_DEPENDENT_REGULATION_OF_MTOR_BY_LKB1_AMPK	REACTOME_ENERGY_DEPENDENT_REGULATION_OF_MTOR_BY_LKB1_AMPK		29	0.322778	1.01432	0.421133	0.705027	1	2904	tags=24%, list=11%, signal=27%
REACTOME_DOWNSTREAM_SIGNALING_OF_ACTIVATED_FGFR1	REACTOME_DOWNSTREAM_SIGNALING_OF_ACTIVATED_FGFR1		25	0.337364	1.01376	0.436908	0.705271	1	6347	tags=32%, list=25%, signal=42%
REACTOME_MECP2_REGULATES_NEURONAL_RECEPTORS_AND_CHANNELS	REACTOME_MECP2_REGULATES_NEURONAL_RECEPTORS_AND_CHANNELS		18	0.361321	1.01349	0.470774	0.704794	1	4318	tags=33%, list=17%, signal=40%
REACTOME_RHOF_GTPASE_CYCLE	REACTOME_RHOF_GTPASE_CYCLE		42	0.300713	1.01305	0.417015	0.704746	1	6914	tags=36%, list=27%, signal=49%
REACTOME_G2_M_DNA_DAMAGE_CHECKPOINT	REACTOME_G2_M_DNA_DAMAGE_CHECKPOINT		57	0.285527	1.01302	0.428767	0.703645	1	5551	tags=32%, list=22%, signal=40%
REACTOME_GLUCOSE_METABOLISM	REACTOME_GLUCOSE_METABOLISM		84	0.267865	1.0126	0.430667	0.703517	1	3635	tags=18%, list=14%, signal=21%
REACTOME_EPIGENETIC_REGULATION_OF_GENE_EXPRESSION	REACTOME_EPIGENETIC_REGULATION_OF_GENE_EXPRESSION		85	0.268415	1.01192	0.428382	0.704068	1	4397	tags=24%, list=17%, signal=28%
REACTOME_NEGATIVE_REGULATION_OF_FGFR2_SIGNALING	REACTOME_NEGATIVE_REGULATION_OF_FGFR2_SIGNALING		28	0.327633	1.01192	0.437991	0.702894	1	6443	tags=32%, list=25%, signal=43%
VEGF_A_UP.V1_DN	VEGF_A_UP.V1_DN		185	0.240762	1.01166	0.427381	0.702345	1	4887	tags=22%, list=19%, signal=27%
REACTOME_SIGNALING_BY_WNT	REACTOME_SIGNALING_BY_WNT		254	0.233493	1.01122	0.445424	0.702267	1	6146	tags=29%, list=24%, signal=37%
REACTOME_SEMAPHORIN_INTERACTIONS	REACTOME_SEMAPHORIN_INTERACTIONS		63	0.277081	1.01067	0.43608	0.702478	1	8536	tags=49%, list=33%, signal=74%
REACTOME_RUNX1_REGULATES_GENES_INVOLVED_IN_MEGAKARYOCYTE_DIFFERENTIATION_AND_PLATELET_FUNCTION	REACTOME_RUNX1_REGULATES_GENES_INVOLVED_IN_MEGAKARYOCYTE_DIFFERENTIATION_AND_PLATELET_FUNCTION		38	0.311943	1.00995	0.432229	0.703131	1	3395	tags=21%, list=13%, signal=24%
REACTOME_REGULATION_OF_TNFR1_SIGNALING	REACTOME_REGULATION_OF_TNFR1_SIGNALING		34	0.317424	1.00716	0.444094	0.70913	1	6662	tags=41%, list=26%, signal=56%
REACTOME_SMAD2_SMAD3_SMAD4_HETEROTRIMER_REGULATES_TRANSCRIPTION	REACTOME_SMAD2_SMAD3_SMAD4_HETEROTRIMER_REGULATES_TRANSCRIPTION		31	0.320449	1.00688	0.462709	0.708707	1	3968	tags=29%, list=15%, signal=34%
P53_DN.V1_DN	P53_DN.V1_DN		175	0.239001	1.00655	0.452005	0.708365	1	3566	tags=15%, list=14%, signal=17%
REACTOME_CONSTITUTIVE_SIGNALING_BY_LIGAND_RESPONSIVE_EGFR_CANCER_VARIANTS	REACTOME_CONSTITUTIVE_SIGNALING_BY_LIGAND_RESPONSIVE_EGFR_CANCER_VARIANTS		18	0.361539	1.00604	0.468954	0.7085	1	6443	tags=44%, list=25%, signal=59%
REACTOME_METABOLISM_OF_FAT_SOLUBLE_VITAMINS	REACTOME_METABOLISM_OF_FAT_SOLUBLE_VITAMINS		34	0.318558	1.00575	0.453608	0.708041	1	2723	tags=18%, list=11%, signal=20%
REACTOME_RUNX2_REGULATES_OSTEOBLAST_DIFFERENTIATION	REACTOME_RUNX2_REGULATES_OSTEOBLAST_DIFFERENTIATION		23	0.341861	1.00558	0.469136	0.707315	1	1886	tags=17%, list=7%, signal=19%
REACTOME_ABERRANT_REGULATION_OF_MITOTIC_EXIT_IN_CANCER_DUE_TO_RB1_DEFECTS	REACTOME_ABERRANT_REGULATION_OF_MITOTIC_EXIT_IN_CANCER_DUE_TO_RB1_DEFECTS		20	0.347765	1.00447	0.458537	0.709002	1	3018	tags=25%, list=12%, signal=28%
REACTOME_SARS_COV_INFECTIONS	REACTOME_SARS_COV_INFECTIONS		141	0.246723	1.00423	0.459259	0.708474	1	4393	tags=21%, list=17%, signal=25%
KEGG_PANCREATIC_CANCER	KEGG_PANCREATIC_CANCER		68	0.274974	1.00362	0.473538	0.708881	1	5288	tags=24%, list=21%, signal=30%
MEK_UP.V1_DN	MEK_UP.V1_DN		168	0.240756	1.00174	0.479853	0.712492	1	3807	tags=20%, list=15%, signal=23%
REACTOME_CELL_JUNCTION_ORGANIZATION	REACTOME_CELL_JUNCTION_ORGANIZATION		76	0.267777	1.00135	0.46462	0.712381	1	7501	tags=38%, list=29%, signal=54%
KRAS.600.LUNG.BREAST_UP.V1_DN	KRAS.600.LUNG.BREAST_UP.V1_DN		225	0.234707	1.00086	0.479436	0.712557	1	2919	tags=13%, list=11%, signal=14%
REACTOME_STIMULI_SENSING_CHANNELS	REACTOME_STIMULI_SENSING_CHANNELS		93	0.259079	0.999172	0.465147	0.715714	1	4533	tags=19%, list=18%, signal=23%
REACTOME_KERATAN_SULFATE_BIOSYNTHESIS	REACTOME_KERATAN_SULFATE_BIOSYNTHESIS		26	0.327229	0.998901	0.457364	0.715254	1	4314	tags=31%, list=17%, signal=37%
REACTOME_NEGATIVE_EPIGENETIC_REGULATION_OF_RRNA_EXPRESSION	REACTOME_NEGATIVE_EPIGENETIC_REGULATION_OF_RRNA_EXPRESSION		46	0.292984	0.998577	0.463097	0.714979	1	4397	tags=24%, list=17%, signal=29%
REACTOME_CELL_CELL_JUNCTION_ORGANIZATION	REACTOME_CELL_CELL_JUNCTION_ORGANIZATION		50	0.290865	0.995509	0.47877	0.721678	1	3979	tags=20%, list=15%, signal=24%
BMI1_DN.V1_DN	BMI1_DN.V1_DN		120	0.249374	0.9954	0.475949	0.72077	1	5679	tags=25%, list=22%, signal=32%
REACTOME_SIGNALING_BY_MET	REACTOME_SIGNALING_BY_MET		77	0.266702	0.994814	0.456189	0.721069	1	4916	tags=27%, list=19%, signal=34%
REACTOME_SLC_MEDIATED_TRANSMEMBRANE_TRANSPORT	REACTOME_SLC_MEDIATED_TRANSMEMBRANE_TRANSPORT		211	0.231949	0.992055	0.500577	0.727016	1	4910	tags=22%, list=19%, signal=27%
KEGG_APOPTOSIS	KEGG_APOPTOSIS		83	0.260968	0.991021	0.484687	0.728479	1	5493	tags=29%, list=21%, signal=37%
CYCLIN_D1_KE_.V1_UP	CYCLIN_D1_KE_.V1_UP		165	0.236655	0.988462	0.480907	0.733777	1	6361	tags=32%, list=25%, signal=42%
REACTOME_MOLECULES_ASSOCIATED_WITH_ELASTIC_FIBRES	REACTOME_MOLECULES_ASSOCIATED_WITH_ELASTIC_FIBRES		34	0.307073	0.986464	0.472593	0.737735	1	5282	tags=26%, list=21%, signal=33%
KEGG_LONG_TERM_POTENTIATION	KEGG_LONG_TERM_POTENTIATION		67	0.267965	0.98541	0.496474	0.739142	1	4188	tags=18%, list=16%, signal=21%
REACTOME_EXTRA_NUCLEAR_ESTROGEN_SIGNALING	REACTOME_EXTRA_NUCLEAR_ESTROGEN_SIGNALING		68	0.268187	0.984705	0.480337	0.739765	1	3121	tags=16%, list=12%, signal=18%
REACTOME_ABERRANT_REGULATION_OF_MITOTIC_G1_S_TRANSITION_IN_CANCER_DUE_TO_RB1_DEFECTS	REACTOME_ABERRANT_REGULATION_OF_MITOTIC_G1_S_TRANSITION_IN_CANCER_DUE_TO_RB1_DEFECTS		17	0.365554	0.983553	0.478331	0.741506	1	2998	tags=18%, list=12%, signal=20%
REACTOME_RND1_GTPASE_CYCLE	REACTOME_RND1_GTPASE_CYCLE		42	0.295811	0.978682	0.481159	0.752908	1	3897	tags=21%, list=15%, signal=25%
REACTOME_SMOOTH_MUSCLE_CONTRACTION	REACTOME_SMOOTH_MUSCLE_CONTRACTION		33	0.301864	0.97865	0.477636	0.751766	1	4540	tags=21%, list=18%, signal=26%
TBK1.DN.48HRS_DN	TBK1.DN.48HRS_DN		48	0.280978	0.97617	0.48951	0.756755	1	4942	tags=23%, list=19%, signal=28%
REACTOME_TP53_REGULATES_TRANSCRIPTION_OF_CELL_DEATH_GENES	REACTOME_TP53_REGULATES_TRANSCRIPTION_OF_CELL_DEATH_GENES		44	0.287764	0.974219	0.51073	0.760616	1	3924	tags=23%, list=15%, signal=27%
ATF2_UP.V1_DN	ATF2_UP.V1_DN		159	0.23256	0.973618	0.520884	0.760881	1	4622	tags=20%, list=18%, signal=24%
REACTOME_SIGNALING_BY_FGFR_IN_DISEASE	REACTOME_SIGNALING_BY_FGFR_IN_DISEASE		56	0.2726	0.973416	0.492978	0.760161	1	6427	tags=32%, list=25%, signal=43%
REACTOME_AUTOPHAGY	REACTOME_AUTOPHAGY		143	0.236904	0.971013	0.508557	0.764986	1	4481	tags=23%, list=17%, signal=28%
REACTOME_TNFS_BIND_THEIR_PHYSIOLOGICAL_RECEPTORS	REACTOME_TNFS_BIND_THEIR_PHYSIOLOGICAL_RECEPTORS		27	0.31972	0.970736	0.479326	0.764516	1	6181	tags=30%, list=24%, signal=39%
REACTOME_ONCOGENIC_MAPK_SIGNALING	REACTOME_ONCOGENIC_MAPK_SIGNALING		76	0.263554	0.970333	0.51084	0.764318	1	5203	tags=25%, list=20%, signal=31%
KEGG_SPHINGOLIPID_METABOLISM	KEGG_SPHINGOLIPID_METABOLISM		37	0.293918	0.970252	0.495441	0.763329	1	2350	tags=16%, list=9%, signal=18%
KEGG_ALZHEIMERS_DISEASE	KEGG_ALZHEIMERS_DISEASE		145	0.237245	0.969894	0.53602	0.763084	1	7831	tags=36%, list=30%, signal=51%
REACTOME_RHO_GTPASE_EFFECTORS	REACTOME_RHO_GTPASE_EFFECTORS		251	0.221973	0.969498	0.547646	0.762857	1	4734	tags=20%, list=18%, signal=24%
KEGG_ARRHYTHMOGENIC_RIGHT_VENTRICULAR_CARDIOMYOPATHY_ARVC	KEGG_ARRHYTHMOGENIC_RIGHT_VENTRICULAR_CARDIOMYOPATHY_ARVC		68	0.261829	0.968829	0.51289	0.76331	1	6394	tags=31%, list=25%, signal=41%
BCAT_GDS748_UP	BCAT_GDS748_UP		40	0.291741	0.965098	0.513433	0.771665	1	1548	tags=13%, list=6%, signal=13%
REACTOME_TRANSLOCATION_OF_SLC2A4_GLUT4_TO_THE_PLASMA_MEMBRANE	REACTOME_TRANSLOCATION_OF_SLC2A4_GLUT4_TO_THE_PLASMA_MEMBRANE		68	0.265175	0.962568	0.506329	0.776887	1	5288	tags=28%, list=21%, signal=35%
REACTOME_TRIGLYCERIDE_CATABOLISM	REACTOME_TRIGLYCERIDE_CATABOLISM		18	0.343651	0.96247	0.517707	0.775889	1	2010	tags=17%, list=8%, signal=18%
REACTOME_AGGREPHAGY	REACTOME_AGGREPHAGY		38	0.292717	0.962367	0.527977	0.774922	1	4012	tags=21%, list=16%, signal=25%
REACTOME_SIGNALING_BY_FGFR3	REACTOME_SIGNALING_BY_FGFR3		36	0.294462	0.962197	0.511556	0.774139	1	6443	tags=33%, list=25%, signal=44%
KEGG_RENAL_CELL_CARCINOMA	KEGG_RENAL_CELL_CARCINOMA		66	0.263998	0.962036	0.520107	0.7733	1	7529	tags=41%, list=29%, signal=58%
CYCLIN_D1_UP.V1_UP	CYCLIN_D1_UP.V1_UP		159	0.233719	0.961244	0.530414	0.77413	1	6353	tags=30%, list=25%, signal=40%
REACTOME_COOPERATION_OF_PREFOLDIN_AND_TRIC_CCT_IN_ACTIN_AND_TUBULIN_FOLDING	REACTOME_COOPERATION_OF_PREFOLDIN_AND_TRIC_CCT_IN_ACTIN_AND_TUBULIN_FOLDING		31	0.303266	0.960217	0.522621	0.775546	1	6273	tags=29%, list=24%, signal=38%
REACTOME_SUMOYLATION_OF_UBIQUITINYLATION_PROTEINS	REACTOME_SUMOYLATION_OF_UBIQUITINYLATION_PROTEINS		38	0.291216	0.959998	0.508982	0.774949	1	2421	tags=18%, list=9%, signal=20%
KEGG_CELL_CYCLE	KEGG_CELL_CYCLE		122	0.2399	0.958135	0.541026	0.778443	1	3372	tags=16%, list=13%, signal=18%
KEGG_SMALL_CELL_LUNG_CANCER	KEGG_SMALL_CELL_LUNG_CANCER		81	0.255876	0.957225	0.509333	0.779542	1	7101	tags=33%, list=28%, signal=46%
REACTOME_RHOC_GTPASE_CYCLE	REACTOME_RHOC_GTPASE_CYCLE		71	0.262121	0.956676	0.531421	0.779686	1	5215	tags=25%, list=20%, signal=32%
REACTOME_NEDDYLATION	REACTOME_NEDDYLATION		224	0.223886	0.956338	0.569067	0.779324	1	4980	tags=28%, list=19%, signal=34%
REACTOME_NEUREXINS_AND_NEUROLIGINS	REACTOME_NEUREXINS_AND_NEUROLIGINS		55	0.26688	0.955751	0.529248	0.779602	1	1899	tags=11%, list=7%, signal=12%
REACTOME_DECTIN_2_FAMILY	REACTOME_DECTIN_2_FAMILY		23	0.332225	0.95567	0.524922	0.778578	1	6659	tags=39%, list=26%, signal=53%
NRL_DN.V1_DN	NRL_DN.V1_DN		113	0.241227	0.95547	0.542675	0.777792	1	5143	tags=21%, list=20%, signal=26%
KEGG_PROSTATE_CANCER	KEGG_PROSTATE_CANCER		86	0.251464	0.952167	0.541667	0.784826	1	6347	tags=30%, list=25%, signal=40%
E2F3_UP.V1_DN	E2F3_UP.V1_DN		131	0.232916	0.952055	0.542435	0.783891	1	6380	tags=30%, list=25%, signal=39%
CYCLIN_D1_UP.V1_DN	CYCLIN_D1_UP.V1_DN		161	0.22889	0.952013	0.564904	0.782778	1	5460	tags=27%, list=21%, signal=34%
REACTOME_REPRODUCTION	REACTOME_REPRODUCTION		71	0.25487	0.951417	0.526171	0.78311	1	5737	tags=28%, list=22%, signal=36%
REACTOME_TRANSPORT_OF_MATURE_TRANSCRIPT_TO_CYTOPLASM	REACTOME_TRANSPORT_OF_MATURE_TRANSCRIPT_TO_CYTOPLASM		83	0.248361	0.950816	0.536458	0.783381	1	3904	tags=22%, list=15%, signal=25%
REACTOME_PLASMA_LIPOPROTEIN_CLEARANCE	REACTOME_PLASMA_LIPOPROTEIN_CLEARANCE		32	0.297885	0.950676	0.526718	0.782524	1	6200	tags=31%, list=24%, signal=41%
CYCLIN_D1_KE_.V1_DN	CYCLIN_D1_KE_.V1_DN		159	0.230178	0.949809	0.563882	0.783389	1	5810	tags=28%, list=23%, signal=36%
REACTOME_RNA_POLYMERASE_II_TRANSCRIPTION_TERMINATION	REACTOME_RNA_POLYMERASE_II_TRANSCRIPTION_TERMINATION		66	0.260818	0.948579	0.543056	0.785234	1	4552	tags=27%, list=18%, signal=33%
REACTOME_O_LINKED_GLYCOSYLATION	REACTOME_O_LINKED_GLYCOSYLATION		100	0.244888	0.947208	0.553708	0.78756	1	5930	tags=24%, list=23%, signal=31%
REACTOME_ZINC_TRANSPORTERS	REACTOME_ZINC_TRANSPORTERS		15	0.352322	0.946716	0.544118	0.787512	1	3675	tags=33%, list=14%, signal=39%
REACTOME_TRANSCRIPTIONAL_REGULATION_OF_GRANULOPOIESIS	REACTOME_TRANSCRIPTIONAL_REGULATION_OF_GRANULOPOIESIS		30	0.296267	0.946655	0.537313	0.786448	1	7309	tags=33%, list=28%, signal=47%
REACTOME_NOTCH3_ACTIVATION_AND_TRANSMISSION_OF_SIGNAL_TO_THE_NUCLEUS	REACTOME_NOTCH3_ACTIVATION_AND_TRANSMISSION_OF_SIGNAL_TO_THE_NUCLEUS		24	0.314701	0.94478	0.525157	0.789832	1	5166	tags=25%, list=20%, signal=31%
LTE2_UP.V1_UP	LTE2_UP.V1_UP		178	0.22405	0.94456	0.575232	0.78916	1	6326	tags=28%, list=25%, signal=37%
REACTOME_INWARDLY_RECTIFYING_K_CHANNELS	REACTOME_INWARDLY_RECTIFYING_K_CHANNELS		31	0.301739	0.943559	0.526397	0.790432	1	3491	tags=23%, list=14%, signal=26%
REACTOME_SIGNALING_BY_EGFR_IN_CANCER	REACTOME_SIGNALING_BY_EGFR_IN_CANCER		23	0.313476	0.943557	0.540123	0.789235	1	6443	tags=39%, list=25%, signal=52%
REACTOME_ACTIVATION_OF_AMPK_DOWNSTREAM_OF_NMDARS	REACTOME_ACTIVATION_OF_AMPK_DOWNSTREAM_OF_NMDARS		25	0.317463	0.94097	0.530675	0.794302	1	4012	tags=24%, list=16%, signal=28%
REACTOME_SPHINGOLIPID_DE_NOVO_BIOSYNTHESIS	REACTOME_SPHINGOLIPID_DE_NOVO_BIOSYNTHESIS		41	0.275948	0.940225	0.543914	0.794984	1	3412	tags=20%, list=13%, signal=22%
REACTOME_RHO_GTPASES_ACTIVATE_WASPS_AND_WAVES	REACTOME_RHO_GTPASES_ACTIVATE_WASPS_AND_WAVES		36	0.291279	0.939862	0.546311	0.794654	1	1886	tags=17%, list=7%, signal=18%
REACTOME_CHROMATIN_MODIFYING_ENZYMES	REACTOME_CHROMATIN_MODIFYING_ENZYMES		196	0.219554	0.938918	0.60578	0.795698	1	3967	tags=20%, list=15%, signal=23%
REACTOME_RHOD_GTPASE_CYCLE	REACTOME_RHOD_GTPASE_CYCLE		50	0.275007	0.938259	0.569322	0.796085	1	3801	tags=20%, list=15%, signal=23%
REACTOME_CLASS_B_2_SECRETIN_FAMILY_RECEPTORS	REACTOME_CLASS_B_2_SECRETIN_FAMILY_RECEPTORS		71	0.254273	0.938176	0.550685	0.795097	1	3223	tags=17%, list=13%, signal=19%
REACTOME_RAC3_GTPASE_CYCLE	REACTOME_RAC3_GTPASE_CYCLE		90	0.246255	0.936427	0.588394	0.798155	1	6138	tags=26%, list=24%, signal=33%
REACTOME_VIRAL_MESSENGER_RNA_SYNTHESIS	REACTOME_VIRAL_MESSENGER_RNA_SYNTHESIS		43	0.278097	0.936261	0.556222	0.797348	1	1507	tags=14%, list=6%, signal=15%
CAHOY_ASTROGLIAL	CAHOY_ASTROGLIAL		91	0.24016	0.931283	0.577128	0.808342	1	6796	tags=26%, list=26%, signal=36%
REACTOME_NEUROTRANSMITTER_RECEPTORS_AND_POSTSYNAPTIC_SIGNAL_TRANSMISSION	REACTOME_NEUROTRANSMITTER_RECEPTORS_AND_POSTSYNAPTIC_SIGNAL_TRANSMISSION		179	0.221359	0.931227	0.63615	0.807275	1	4188	tags=15%, list=16%, signal=18%
REACTOME_NEGATIVE_REGULATION_OF_FLT3	REACTOME_NEGATIVE_REGULATION_OF_FLT3		15	0.348615	0.929648	0.547855	0.809851	1	6443	tags=47%, list=25%, signal=62%
REACTOME_TP53_REGULATES_METABOLIC_GENES	REACTOME_TP53_REGULATES_METABOLIC_GENES		86	0.243259	0.929556	0.577333	0.808867	1	6976	tags=38%, list=27%, signal=52%
HALLMARK_MTORC1_SIGNALING	HALLMARK_MTORC1_SIGNALING		196	0.219765	0.928452	0.642857	0.810308	1	4534	tags=23%, list=18%, signal=28%
REACTOME_NOTCH4_INTRACELLULAR_DOMAIN_REGULATES_TRANSCRIPTION	REACTOME_NOTCH4_INTRACELLULAR_DOMAIN_REGULATES_TRANSCRIPTION		20	0.334634	0.927786	0.560065	0.81067	1	2844	tags=20%, list=11%, signal=22%
RAPA_EARLY_UP.V1_DN	RAPA_EARLY_UP.V1_DN		159	0.225631	0.926854	0.63305	0.811754	1	6828	tags=32%, list=27%, signal=43%
REACTOME_POST_CHAPERONIN_TUBULIN_FOLDING_PATHWAY	REACTOME_POST_CHAPERONIN_TUBULIN_FOLDING_PATHWAY		21	0.323156	0.925559	0.566069	0.813753	1	4062	tags=24%, list=16%, signal=28%
REACTOME_BASIGIN_INTERACTIONS	REACTOME_BASIGIN_INTERACTIONS		24	0.311396	0.92541	0.555016	0.81294	1	2438	tags=17%, list=9%, signal=18%
REACTOME_TGF_BETA_RECEPTOR_SIGNALING_ACTIVATES_SMADS	REACTOME_TGF_BETA_RECEPTOR_SIGNALING_ACTIVATES_SMADS		32	0.295688	0.924532	0.578149	0.813956	1	4366	tags=25%, list=17%, signal=30%
REACTOME_TRANSPORT_OF_CONNEXONS_TO_THE_PLASMA_MEMBRANE	REACTOME_TRANSPORT_OF_CONNEXONS_TO_THE_PLASMA_MEMBRANE		17	0.345166	0.921669	0.564189	0.819532	1	4012	tags=18%, list=16%, signal=21%
REACTOME_PROCESSING_OF_CAPPED_INTRONLESS_PRE_MRNA	REACTOME_PROCESSING_OF_CAPPED_INTRONLESS_PRE_MRNA		28	0.300308	0.921314	0.571429	0.819148	1	5876	tags=36%, list=23%, signal=46%
KEGG_ADIPOCYTOKINE_SIGNALING_PATHWAY	KEGG_ADIPOCYTOKINE_SIGNALING_PATHWAY		64	0.251894	0.921182	0.616326	0.81822	1	6686	tags=34%, list=26%, signal=46%
REACTOME_NONHOMOLOGOUS_END_JOINING_NHEJ	REACTOME_NONHOMOLOGOUS_END_JOINING_NHEJ		31	0.29416	0.920864	0.573872	0.817713	1	3001	tags=23%, list=12%, signal=26%
REACTOME_SIGNALING_BY_RECEPTOR_TYROSINE_KINASES	REACTOME_SIGNALING_BY_RECEPTOR_TYROSINE_KINASES		478	0.201935	0.918616	0.693856	0.821767	1	6477	tags=26%, list=25%, signal=34%
HALLMARK_ANDROGEN_RESPONSE	HALLMARK_ANDROGEN_RESPONSE		94	0.237639	0.918226	0.600266	0.821485	1	3112	tags=15%, list=12%, signal=17%
REACTOME_SIGNALING_BY_FGFR2_IN_DISEASE	REACTOME_SIGNALING_BY_FGFR2_IN_DISEASE		37	0.282287	0.917336	0.564103	0.822365	1	4050	tags=22%, list=16%, signal=26%
REACTOME_SLC_TRANSPORTER_DISORDERS	REACTOME_SLC_TRANSPORTER_DISORDERS		86	0.241321	0.917208	0.617647	0.821463	1	1507	tags=12%, list=6%, signal=12%
REACTOME_INTEGRATION_OF_ENERGY_METABOLISM	REACTOME_INTEGRATION_OF_ENERGY_METABOLISM		98	0.234799	0.915989	0.638411	0.823176	1	4084	tags=17%, list=16%, signal=21%
REACTOME_NCAM_SIGNALING_FOR_NEURITE_OUT_GROWTH	REACTOME_NCAM_SIGNALING_FOR_NEURITE_OUT_GROWTH		59	0.257466	0.915059	0.593123	0.824184	1	7450	tags=37%, list=29%, signal=52%
REACTOME_EXTRACELLULAR_MATRIX_ORGANIZATION	REACTOME_EXTRACELLULAR_MATRIX_ORGANIZATION		270	0.208999	0.914312	0.698324	0.824735	1	6756	tags=27%, list=26%, signal=36%
REACTOME_RHO_GTPASE_CYCLE	REACTOME_RHO_GTPASE_CYCLE		432	0.20254	0.913799	0.705502	0.824798	1	5244	tags=22%, list=20%, signal=27%
REACTOME_FOXO_MEDIATED_TRANSCRIPTION_OF_CELL_CYCLE_GENES	REACTOME_FOXO_MEDIATED_TRANSCRIPTION_OF_CELL_CYCLE_GENES		17	0.333437	0.912471	0.576862	0.826744	1	3399	tags=24%, list=13%, signal=27%
GCNP_SHH_UP_LATE.V1_UP	GCNP_SHH_UP_LATE.V1_UP		170	0.221933	0.912107	0.653706	0.8264	1	3677	tags=16%, list=14%, signal=18%
REACTOME_TBC_RABGAPS	REACTOME_TBC_RABGAPS		44	0.274572	0.910504	0.609078	0.829018	1	3661	tags=23%, list=14%, signal=26%
KRAS.BREAST_UP.V1_DN	KRAS.BREAST_UP.V1_DN		112	0.226989	0.909652	0.639798	0.829821	1	1334	tags=7%, list=5%, signal=8%
REACTOME_COMPLEX_I_BIOGENESIS	REACTOME_COMPLEX_I_BIOGENESIS		57	0.252567	0.908827	0.59388	0.830648	1	5677	tags=33%, list=22%, signal=43%
REACTOME_SIGNALING_BY_HIPPO	REACTOME_SIGNALING_BY_HIPPO		20	0.320255	0.907977	0.575908	0.831576	1	514	tags=10%, list=2%, signal=10%
REACTOME_ACTIVATION_OF_KAINATE_RECEPTORS_UPON_GLUTAMATE_BINDING	REACTOME_ACTIVATION_OF_KAINATE_RECEPTORS_UPON_GLUTAMATE_BINDING		27	0.298351	0.907723	0.598101	0.830949	1	4774	tags=26%, list=19%, signal=32%
REACTOME_OPIOID_SIGNALLING	REACTOME_OPIOID_SIGNALLING		83	0.239137	0.904607	0.652344	0.837013	1	4188	tags=19%, list=16%, signal=23%
REACTOME_SUMOYLATION_OF_TRANSCRIPTION_COFACTORS	REACTOME_SUMOYLATION_OF_TRANSCRIPTION_COFACTORS		42	0.2732	0.903633	0.601482	0.838109	1	3265	tags=21%, list=13%, signal=25%
SNF5_DN.V1_DN	SNF5_DN.V1_DN		134	0.222326	0.902975	0.66375	0.838503	1	5860	tags=27%, list=23%, signal=35%
REACTOME_RHO_GTPASES_ACTIVATE_FORMINS	REACTOME_RHO_GTPASES_ACTIVATE_FORMINS		130	0.223546	0.902029	0.64751	0.839373	1	4734	tags=19%, list=18%, signal=23%
KRAS.KIDNEY_UP.V1_UP	KRAS.KIDNEY_UP.V1_UP		129	0.221188	0.900914	0.657727	0.840698	1	4447	tags=16%, list=17%, signal=20%
REACTOME_FGFR1_MUTANT_RECEPTOR_ACTIVATION	REACTOME_FGFR1_MUTANT_RECEPTOR_ACTIVATION		25	0.301059	0.900512	0.581395	0.840419	1	6427	tags=36%, list=25%, signal=48%
REACTOME_ACYL_CHAIN_REMODELLING_OF_PE	REACTOME_ACYL_CHAIN_REMODELLING_OF_PE		17	0.336117	0.900355	0.590909	0.839565	1	3607	tags=24%, list=14%, signal=27%
REACTOME_RND3_GTPASE_CYCLE	REACTOME_RND3_GTPASE_CYCLE		42	0.26905	0.900254	0.622951	0.838574	1	1517	tags=12%, list=6%, signal=13%
REACTOME_RESPIRATORY_ELECTRON_TRANSPORT_ATP_SYNTHESIS_BY_CHEMIOSMOTIC_COUPLING_AND_HEAT_PRODUCTION_BY_UNCOUPLING_PROTEINS	REACTOME_RESPIRATORY_ELECTRON_TRANSPORT_ATP_SYNTHESIS_BY_CHEMIOSMOTIC_COUPLING_AND_HEAT_PRODUCTION_BY_UNCOUPLING_PROTEINS		110	0.226833	0.899632	0.651134	0.838739	1	6220	tags=32%, list=24%, signal=42%
KEGG_PATHOGENIC_ESCHERICHIA_COLI_INFECTION	KEGG_PATHOGENIC_ESCHERICHIA_COLI_INFECTION		52	0.257314	0.896857	0.61103	0.843774	1	4542	tags=23%, list=18%, signal=28%
KEGG_VASCULAR_SMOOTH_MUSCLE_CONTRACTION	KEGG_VASCULAR_SMOOTH_MUSCLE_CONTRACTION		97	0.232395	0.896227	0.657106	0.844092	1	2531	tags=11%, list=10%, signal=13%
HALLMARK_ESTROGEN_RESPONSE_EARLY	HALLMARK_ESTROGEN_RESPONSE_EARLY		186	0.211836	0.895722	0.682088	0.844021	1	4536	tags=18%, list=18%, signal=21%
PTEN_DN.V2_DN	PTEN_DN.V2_DN		125	0.222801	0.895546	0.661728	0.84321	1	4577	tags=19%, list=18%, signal=23%
REACTOME_REGULATION_OF_TP53_EXPRESSION_AND_DEGRADATION	REACTOME_REGULATION_OF_TP53_EXPRESSION_AND_DEGRADATION		37	0.272146	0.89125	0.632047	0.851802	1	6655	tags=38%, list=26%, signal=51%
REACTOME_ADP_SIGNALLING_THROUGH_P2Y_PURINOCEPTOR_1	REACTOME_ADP_SIGNALLING_THROUGH_P2Y_PURINOCEPTOR_1		22	0.300839	0.89108	0.611285	0.85097	1	2353	tags=18%, list=9%, signal=20%
REACTOME_MET_PROMOTES_CELL_MOTILITY	REACTOME_MET_PROMOTES_CELL_MOTILITY		40	0.269285	0.889968	0.649709	0.852356	1	8615	tags=52%, list=34%, signal=79%
REACTOME_SIGNALING_BY_VEGF	REACTOME_SIGNALING_BY_VEGF		104	0.226809	0.886608	0.678348	0.858699	1	1732	tags=10%, list=7%, signal=10%
REACTOME_DOWNREGULATION_OF_SMAD2_3_SMAD4_TRANSCRIPTIONAL_ACTIVITY	REACTOME_DOWNREGULATION_OF_SMAD2_3_SMAD4_TRANSCRIPTIONAL_ACTIVITY		23	0.302368	0.886457	0.633914	0.857824	1	1010	tags=13%, list=4%, signal=14%
REACTOME_GRB2_EVENTS_IN_ERBB2_SIGNALING	REACTOME_GRB2_EVENTS_IN_ERBB2_SIGNALING		15	0.340209	0.884772	0.600977	0.860402	1	6347	tags=40%, list=25%, signal=53%
JNK_DN.V1_DN	JNK_DN.V1_DN		156	0.213216	0.880112	0.711744	0.869618	1	5744	tags=24%, list=22%, signal=31%
KRAS.AMP.LUNG_UP.V1_UP	KRAS.AMP.LUNG_UP.V1_UP		103	0.225056	0.879	0.681529	0.87082	1	6678	tags=25%, list=26%, signal=34%
REACTOME_GAB1_SIGNALOSOME	REACTOME_GAB1_SIGNALOSOME		15	0.33009	0.875518	0.619765	0.877454	1	7450	tags=40%, list=29%, signal=56%
REACTOME_PHOSPHORYLATION_OF_THE_APC_C	REACTOME_PHOSPHORYLATION_OF_THE_APC_C		20	0.303562	0.874522	0.6144	0.878401	1	3018	tags=20%, list=12%, signal=23%
HALLMARK_REACTIVE_OXYGEN_SPECIES_PATHWAY	HALLMARK_REACTIVE_OXYGEN_SPECIES_PATHWAY		47	0.256028	0.873709	0.670977	0.878984	1	3741	tags=21%, list=15%, signal=25%
REACTOME_PROTEIN_UBIQUITINATION	REACTOME_PROTEIN_UBIQUITINATION		63	0.236656	0.873637	0.677465	0.877955	1	5801	tags=30%, list=23%, signal=39%
REACTOME_RHOQ_GTPASE_CYCLE	REACTOME_RHOQ_GTPASE_CYCLE		59	0.243438	0.87255	0.674157	0.879211	1	6114	tags=32%, list=24%, signal=42%
REACTOME_DISEASES_ASSOCIATED_WITH_O_GLYCOSYLATION_OF_PROTEINS	REACTOME_DISEASES_ASSOCIATED_WITH_O_GLYCOSYLATION_OF_PROTEINS		62	0.241574	0.869002	0.668061	0.885884	1	6635	tags=31%, list=26%, signal=41%
REACTOME_SIGNALING_BY_FGFR1	REACTOME_SIGNALING_BY_FGFR1		44	0.256225	0.868768	0.668563	0.88518	1	6443	tags=27%, list=25%, signal=36%
REACTOME_ESTROGEN_DEPENDENT_NUCLEAR_EVENTS_DOWNSTREAM_OF_ESR_MEMBRANE_SIGNALING	REACTOME_ESTROGEN_DEPENDENT_NUCLEAR_EVENTS_DOWNSTREAM_OF_ESR_MEMBRANE_SIGNALING		22	0.305491	0.868067	0.638095	0.885533	1	8891	tags=36%, list=35%, signal=56%
REACTOME_ION_CHANNEL_TRANSPORT	REACTOME_ION_CHANNEL_TRANSPORT		161	0.207406	0.867671	0.749701	0.88513	1	4340	tags=16%, list=17%, signal=19%
REACTOME_CELL_DEATH_SIGNALLING_VIA_NRAGE_NRIF_AND_NADE	REACTOME_CELL_DEATH_SIGNALLING_VIA_NRAGE_NRIF_AND_NADE		74	0.234388	0.866827	0.722222	0.885818	1	2814	tags=14%, list=11%, signal=15%
REACTOME_ACTIVATION_OF_NMDA_RECEPTORS_AND_POSTSYNAPTIC_EVENTS	REACTOME_ACTIVATION_OF_NMDA_RECEPTORS_AND_POSTSYNAPTIC_EVENTS		88	0.228248	0.865071	0.713506	0.888446	1	4539	tags=18%, list=18%, signal=22%
REACTOME_RESPIRATORY_ELECTRON_TRANSPORT	REACTOME_RESPIRATORY_ELECTRON_TRANSPORT		103	0.223077	0.862312	0.707097	0.893166	1	6220	tags=32%, list=24%, signal=42%
REACTOME_RAC2_GTPASE_CYCLE	REACTOME_RAC2_GTPASE_CYCLE		86	0.226236	0.861786	0.725955	0.893099	1	4809	tags=22%, list=19%, signal=27%
REACTOME_SIGNALING_BY_ROBO_RECEPTORS	REACTOME_SIGNALING_BY_ROBO_RECEPTORS		208	0.202046	0.86067	0.75981	0.894315	1	5567	tags=25%, list=22%, signal=32%
KEGG_MELANOMA	KEGG_MELANOMA		62	0.239822	0.859564	0.693593	0.895431	1	7652	tags=34%, list=30%, signal=48%
REACTOME_RESPONSE_OF_EIF2AK1_HRI_TO_HEME_DEFICIENCY	REACTOME_RESPONSE_OF_EIF2AK1_HRI_TO_HEME_DEFICIENCY		15	0.326764	0.859008	0.6576	0.895422	1	3831	tags=27%, list=15%, signal=31%
REACTOME_DEFECTIVE_C1GALT1C1_CAUSES_TN_POLYAGGLUTINATION_SYNDROME_TNPS	REACTOME_DEFECTIVE_C1GALT1C1_CAUSES_TN_POLYAGGLUTINATION_SYNDROME_TNPS		15	0.321004	0.858413	0.635468	0.895491	1	9171	tags=47%, list=36%, signal=73%
KEGG_TIGHT_JUNCTION	KEGG_TIGHT_JUNCTION		118	0.215759	0.858248	0.741016	0.894637	1	4239	tags=17%, list=16%, signal=20%
REACTOME_ERK_MAPK_TARGETS	REACTOME_ERK_MAPK_TARGETS		22	0.295385	0.858198	0.64687	0.893533	1	2849	tags=23%, list=11%, signal=26%
REACTOME_TRANSCRIPTIONAL_REGULATION_BY_THE_AP_2_TFAP2_FAMILY_OF_TRANSCRIPTION_FACTORS	REACTOME_TRANSCRIPTIONAL_REGULATION_BY_THE_AP_2_TFAP2_FAMILY_OF_TRANSCRIPTION_FACTORS		32	0.268906	0.857403	0.690402	0.894104	1	5151	tags=28%, list=20%, signal=35%
KEGG_T_CELL_RECEPTOR_SIGNALING_PATHWAY	KEGG_T_CELL_RECEPTOR_SIGNALING_PATHWAY		101	0.219986	0.854767	0.747051	0.898566	1	2303	tags=12%, list=9%, signal=13%
REACTOME_ADRENALINE_NORADRENALINE_INHIBITS_INSULIN_SECRETION	REACTOME_ADRENALINE_NORADRENALINE_INHIBITS_INSULIN_SECRETION		24	0.289038	0.852498	0.684458	0.902193	1	3013	tags=21%, list=12%, signal=24%
REACTOME_RAC1_GTPASE_CYCLE	REACTOME_RAC1_GTPASE_CYCLE		179	0.202024	0.849735	0.779741	0.906872	1	5244	tags=20%, list=20%, signal=24%
REACTOME_RHOJ_GTPASE_CYCLE	REACTOME_RHOJ_GTPASE_CYCLE		53	0.242924	0.849681	0.711457	0.905755	1	5244	tags=26%, list=20%, signal=33%
KEGG_LONG_TERM_DEPRESSION	KEGG_LONG_TERM_DEPRESSION		59	0.241031	0.849358	0.69735	0.905178	1	7831	tags=39%, list=30%, signal=56%
REACTOME_NETRIN_1_SIGNALING	REACTOME_NETRIN_1_SIGNALING		46	0.249171	0.848209	0.705202	0.906345	1	1955	tags=13%, list=8%, signal=14%
REACTOME_SEALING_OF_THE_NUCLEAR_ENVELOPE_NE_BY_ESCRT_III	REACTOME_SEALING_OF_THE_NUCLEAR_ENVELOPE_NE_BY_ESCRT_III		28	0.273037	0.847699	0.656201	0.906245	1	4342	tags=21%, list=17%, signal=26%
REACTOME_SIGNALING_BY_NOTCH1	REACTOME_SIGNALING_BY_NOTCH1		73	0.228506	0.844692	0.725067	0.911432	1	6509	tags=30%, list=25%, signal=40%
REACTOME_DOWNSTREAM_SIGNAL_TRANSDUCTION	REACTOME_DOWNSTREAM_SIGNAL_TRANSDUCTION		29	0.270193	0.843531	0.690031	0.912732	1	4916	tags=28%, list=19%, signal=34%
REACTOME_ELASTIC_FIBRE_FORMATION	REACTOME_ELASTIC_FIBRE_FORMATION		41	0.253498	0.839724	0.710949	0.919409	1	5282	tags=24%, list=21%, signal=31%
KEGG_COMPLEMENT_AND_COAGULATION_CASCADES	KEGG_COMPLEMENT_AND_COAGULATION_CASCADES		53	0.237714	0.838869	0.740371	0.919967	1	5985	tags=25%, list=23%, signal=32%
ESC_J1_UP_LATE.V1_DN	ESC_J1_UP_LATE.V1_DN		152	0.201664	0.838137	0.81381	0.920305	1	5798	tags=20%, list=23%, signal=25%
REACTOME_SPHINGOLIPID_METABOLISM	REACTOME_SPHINGOLIPID_METABOLISM		81	0.220387	0.838128	0.765416	0.919098	1	2350	tags=12%, list=9%, signal=14%
REACTOME_SUMOYLATION	REACTOME_SUMOYLATION		168	0.201005	0.836899	0.784654	0.920316	1	3465	tags=16%, list=13%, signal=18%
REACTOME_SIGNALING_BY_PDGF	REACTOME_SIGNALING_BY_PDGF		57	0.235427	0.834679	0.717731	0.923681	1	6638	tags=33%, list=26%, signal=45%
REACTOME_E3_UBIQUITIN_LIGASES_UBIQUITINATE_TARGET_PROTEINS	REACTOME_E3_UBIQUITIN_LIGASES_UBIQUITINATE_TARGET_PROTEINS		43	0.242938	0.834566	0.70852	0.922695	1	6897	tags=37%, list=27%, signal=51%
RB_DN.V1_DN	RB_DN.V1_DN		110	0.210094	0.834455	0.795739	0.921716	1	7529	tags=37%, list=29%, signal=52%
REACTOME_KERATAN_SULFATE_KERATIN_METABOLISM	REACTOME_KERATAN_SULFATE_KERATIN_METABOLISM		32	0.263721	0.834448	0.722222	0.920502	1	4314	tags=25%, list=17%, signal=30%
LEF1_UP.V1_DN	LEF1_UP.V1_DN		170	0.198439	0.832351	0.819277	0.923551	1	5500	tags=23%, list=21%, signal=29%
REACTOME_ACYL_CHAIN_REMODELLING_OF_PC	REACTOME_ACYL_CHAIN_REMODELLING_OF_PC		19	0.29082	0.829222	0.686591	0.928508	1	3607	tags=21%, list=14%, signal=24%
REACTOME_INTERLEUKIN_37_SIGNALING	REACTOME_INTERLEUKIN_37_SIGNALING		21	0.289701	0.82889	0.69771	0.927966	1	4792	tags=33%, list=19%, signal=41%
HALLMARK_ESTROGEN_RESPONSE_LATE	HALLMARK_ESTROGEN_RESPONSE_LATE		182	0.197589	0.827948	0.81601	0.928614	1	6091	tags=25%, list=24%, signal=33%
REACTOME_TRANSCRIPTIONAL_REGULATION_BY_E2F6	REACTOME_TRANSCRIPTIONAL_REGULATION_BY_E2F6		34	0.258641	0.82488	0.72029	0.933456	1	5134	tags=29%, list=20%, signal=37%
REACTOME_APOPTOTIC_CLEAVAGE_OF_CELLULAR_PROTEINS	REACTOME_APOPTOTIC_CLEAVAGE_OF_CELLULAR_PROTEINS		37	0.250465	0.824194	0.704648	0.933634	1	3544	tags=19%, list=14%, signal=22%
REACTOME_GLUCAGON_TYPE_LIGAND_RECEPTORS	REACTOME_GLUCAGON_TYPE_LIGAND_RECEPTORS		25	0.274618	0.821869	0.726248	0.936846	1	2353	tags=16%, list=9%, signal=18%
REACTOME_SIGNALING_BY_KIT_IN_DISEASE	REACTOME_SIGNALING_BY_KIT_IN_DISEASE		20	0.294026	0.821544	0.696202	0.936226	1	6347	tags=40%, list=25%, signal=53%
REACTOME_FORMATION_OF_FIBRIN_CLOT_CLOTTING_CASCADE	REACTOME_FORMATION_OF_FIBRIN_CLOT_CLOTTING_CASCADE		27	0.268083	0.820786	0.745185	0.936422	1	3395	tags=15%, list=13%, signal=17%
KEGG_ALDOSTERONE_REGULATED_SODIUM_REABSORPTION	KEGG_ALDOSTERONE_REGULATED_SODIUM_REABSORPTION		38	0.24941	0.820506	0.751524	0.935779	1	1730	tags=13%, list=7%, signal=14%
REACTOME_RHOH_GTPASE_CYCLE	REACTOME_RHOH_GTPASE_CYCLE		35	0.248954	0.816324	0.735513	0.942764	1	5682	tags=34%, list=22%, signal=44%
KEGG_TYPE_II_DIABETES_MELLITUS	KEGG_TYPE_II_DIABETES_MELLITUS		44	0.240849	0.816211	0.743262	0.941712	1	7261	tags=32%, list=28%, signal=44%
REACTOME_APOPTOTIC_EXECUTION_PHASE	REACTOME_APOPTOTIC_EXECUTION_PHASE		45	0.240207	0.815536	0.736765	0.94177	1	3544	tags=20%, list=14%, signal=23%
KEGG_VEGF_SIGNALING_PATHWAY	KEGG_VEGF_SIGNALING_PATHWAY		67	0.224245	0.813943	0.77915	0.943573	1	698	tags=6%, list=3%, signal=6%
REACTOME_HOMOLOGOUS_DNA_PAIRING_AND_STRAND_EXCHANGE	REACTOME_HOMOLOGOUS_DNA_PAIRING_AND_STRAND_EXCHANGE		41	0.242357	0.813246	0.740955	0.943794	1	5551	tags=29%, list=22%, signal=37%
REACTOME_REGULATION_OF_MECP2_EXPRESSION_AND_ACTIVITY	REACTOME_REGULATION_OF_MECP2_EXPRESSION_AND_ACTIVITY		31	0.258173	0.813199	0.736246	0.94266	1	4188	tags=19%, list=16%, signal=23%
REACTOME_INTEGRIN_SIGNALING	REACTOME_INTEGRIN_SIGNALING		24	0.269333	0.813083	0.732824	0.941661	1	2872	tags=21%, list=11%, signal=23%
HOXA9_DN.V1_DN	HOXA9_DN.V1_DN		180	0.196141	0.812975	0.848414	0.940643	1	5224	tags=22%, list=20%, signal=28%
REACTOME_KINESINS	REACTOME_KINESINS		53	0.229807	0.812909	0.772206	0.939557	1	6238	tags=26%, list=24%, signal=35%
REACTOME_HOMOLOGY_DIRECTED_REPAIR	REACTOME_HOMOLOGY_DIRECTED_REPAIR		100	0.210324	0.812645	0.8212	0.938863	1	5551	tags=27%, list=22%, signal=34%
REACTOME_O_GLYCOSYLATION_OF_TSR_DOMAIN_CONTAINING_PROTEINS	REACTOME_O_GLYCOSYLATION_OF_TSR_DOMAIN_CONTAINING_PROTEINS		36	0.251638	0.811917	0.742268	0.938984	1	7612	tags=33%, list=30%, signal=47%
REACTOME_PROTEIN_PROTEIN_INTERACTIONS_AT_SYNAPSES	REACTOME_PROTEIN_PROTEIN_INTERACTIONS_AT_SYNAPSES		83	0.211801	0.811486	0.786775	0.938608	1	3211	tags=13%, list=12%, signal=15%
KEGG_INSULIN_SIGNALING_PATHWAY	KEGG_INSULIN_SIGNALING_PATHWAY		130	0.201569	0.80981	0.82236	0.940434	1	5550	tags=25%, list=22%, signal=31%
REACTOME_SIGNALING_BY_WNT_IN_CANCER	REACTOME_SIGNALING_BY_WNT_IN_CANCER		32	0.252967	0.809648	0.74063	0.939552	1	5992	tags=34%, list=23%, signal=45%
REACTOME_TRANSLESION_SYNTHESIS_BY_POLK	REACTOME_TRANSLESION_SYNTHESIS_BY_POLK		17	0.296911	0.809639	0.729904	0.938361	1	7277	tags=41%, list=28%, signal=57%
REACTOME_CA2_PATHWAY	REACTOME_CA2_PATHWAY		59	0.22104	0.80881	0.773925	0.938676	1	7182	tags=32%, list=28%, signal=45%
REACTOME_TRANSCRIPTIONAL_REGULATION_OF_PLURIPOTENT_STEM_CELLS	REACTOME_TRANSCRIPTIONAL_REGULATION_OF_PLURIPOTENT_STEM_CELLS		23	0.275653	0.808367	0.699088	0.938226	1	8784	tags=43%, list=34%, signal=66%
REACTOME_METALLOPROTEASE_DUBS	REACTOME_METALLOPROTEASE_DUBS		17	0.300819	0.80807	0.738989	0.937583	1	5431	tags=35%, list=21%, signal=45%
REACTOME_PLATELET_AGGREGATION_PLUG_FORMATION	REACTOME_PLATELET_AGGREGATION_PLUG_FORMATION		33	0.250786	0.807947	0.756881	0.936597	1	2872	tags=18%, list=11%, signal=20%
HALLMARK_UV_RESPONSE_DN	HALLMARK_UV_RESPONSE_DN		139	0.198847	0.807504	0.836207	0.936235	1	5919	tags=22%, list=23%, signal=29%
IL21_UP.V1_UP	IL21_UP.V1_UP		151	0.198774	0.807114	0.846061	0.935783	1	4988	tags=19%, list=19%, signal=24%
REACTOME_ACTIVATION_OF_MATRIX_METALLOPROTEINASES	REACTOME_ACTIVATION_OF_MATRIX_METALLOPROTEINASES		25	0.271448	0.807053	0.74103	0.934709	1	2490	tags=16%, list=10%, signal=18%
REACTOME_SIGNALING_BY_FGFR2	REACTOME_SIGNALING_BY_FGFR2		66	0.221943	0.805588	0.792867	0.936253	1	4916	tags=21%, list=19%, signal=26%
REACTOME_NUCLEAR_RECEPTOR_TRANSCRIPTION_PATHWAY	REACTOME_NUCLEAR_RECEPTOR_TRANSCRIPTION_PATHWAY		50	0.233204	0.804975	0.781073	0.936165	1	3832	tags=20%, list=15%, signal=23%
REACTOME_HEME_SIGNALING	REACTOME_HEME_SIGNALING		48	0.235659	0.804109	0.766962	0.936589	1	7379	tags=42%, list=29%, signal=58%
REACTOME_RESOLUTION_OF_SISTER_CHROMATID_COHESION	REACTOME_RESOLUTION_OF_SISTER_CHROMATID_COHESION		117	0.201882	0.803851	0.830445	0.935907	1	4979	tags=20%, list=19%, signal=24%
KEGG_CHRONIC_MYELOID_LEUKEMIA	KEGG_CHRONIC_MYELOID_LEUKEMIA		72	0.217879	0.803505	0.8125	0.935395	1	5288	tags=24%, list=21%, signal=30%
REACTOME_APC_C_CDC20_MEDIATED_DEGRADATION_OF_CYCLIN_B	REACTOME_APC_C_CDC20_MEDIATED_DEGRADATION_OF_CYCLIN_B		24	0.267579	0.80305	0.759819	0.935037	1	3968	tags=21%, list=15%, signal=25%
REACTOME_NEGATIVE_REGULATION_OF_FGFR1_SIGNALING	REACTOME_NEGATIVE_REGULATION_OF_FGFR1_SIGNALING		27	0.264766	0.802598	0.762791	0.934653	1	7652	tags=33%, list=30%, signal=47%
REACTOME_DNA_DOUBLE_STRAND_BREAK_RESPONSE	REACTOME_DNA_DOUBLE_STRAND_BREAK_RESPONSE		40	0.236904	0.801764	0.789781	0.934987	1	5664	tags=33%, list=22%, signal=42%
REACTOME_TP53_REGULATES_TRANSCRIPTION_OF_GENES_INVOLVED_IN_G2_CELL_CYCLE_ARREST	REACTOME_TP53_REGULATES_TRANSCRIPTION_OF_GENES_INVOLVED_IN_G2_CELL_CYCLE_ARREST		18	0.2854	0.801633	0.724026	0.934072	1	6414	tags=39%, list=25%, signal=52%
REACTOME_TRISTETRAPROLIN_TTP_ZFP36_BINDS_AND_DESTABILIZES_MRNA	REACTOME_TRISTETRAPROLIN_TTP_ZFP36_BINDS_AND_DESTABILIZES_MRNA		17	0.29033	0.801599	0.714286	0.932953	1	2279	tags=18%, list=9%, signal=19%
REACTOME_RECEPTOR_TYPE_TYROSINE_PROTEIN_PHOSPHATASES	REACTOME_RECEPTOR_TYPE_TYROSINE_PROTEIN_PHOSPHATASES		18	0.28783	0.799824	0.729201	0.934901	1	4316	tags=28%, list=17%, signal=33%
REACTOME_PROSTACYCLIN_SIGNALLING_THROUGH_PROSTACYCLIN_RECEPTOR	REACTOME_PROSTACYCLIN_SIGNALLING_THROUGH_PROSTACYCLIN_RECEPTOR		16	0.298996	0.799676	0.7136	0.933957	1	5257	tags=31%, list=20%, signal=39%
REACTOME_PRESYNAPTIC_FUNCTION_OF_KAINATE_RECEPTORS	REACTOME_PRESYNAPTIC_FUNCTION_OF_KAINATE_RECEPTORS		18	0.283534	0.799465	0.748792	0.933162	1	4774	tags=28%, list=19%, signal=34%
BCAT_BILD_ET_AL_UP	BCAT_BILD_ET_AL_UP		43	0.236418	0.799213	0.768668	0.932453	1	3848	tags=19%, list=15%, signal=22%
REACTOME_SIGNALING_BY_CTNNB1_PHOSPHO_SITE_MUTANTS	REACTOME_SIGNALING_BY_CTNNB1_PHOSPHO_SITE_MUTANTS		15	0.29766	0.798951	0.71381	0.931759	1	8108	tags=53%, list=32%, signal=78%
PRC2_EED_UP.V1_DN	PRC2_EED_UP.V1_DN		180	0.189621	0.796889	0.868039	0.934197	1	2441	tags=11%, list=9%, signal=12%
REACTOME_DISEASES_OF_PROGRAMMED_CELL_DEATH	REACTOME_DISEASES_OF_PROGRAMMED_CELL_DEATH		41	0.236954	0.796594	0.788184	0.933574	1	7846	tags=34%, list=31%, signal=49%
REACTOME_ESR_MEDIATED_SIGNALING	REACTOME_ESR_MEDIATED_SIGNALING		152	0.194516	0.795746	0.872236	0.933893	1	5303	tags=21%, list=21%, signal=26%
HALLMARK_HEME_METABOLISM	HALLMARK_HEME_METABOLISM		191	0.189167	0.794756	0.883586	0.934495	1	4654	tags=19%, list=18%, signal=23%
REACTOME_ENDOGENOUS_STEROLS	REACTOME_ENDOGENOUS_STEROLS		21	0.275919	0.793363	0.755134	0.935785	1	7734	tags=29%, list=30%, signal=41%
REACTOME_NEUTROPHIL_DEGRANULATION	REACTOME_NEUTROPHIL_DEGRANULATION		460	0.175274	0.792099	0.938689	0.936736	1	6797	tags=26%, list=26%, signal=35%
KEGG_B_CELL_RECEPTOR_SIGNALING_PATHWAY	KEGG_B_CELL_RECEPTOR_SIGNALING_PATHWAY		74	0.217752	0.791574	0.804613	0.936507	1	4132	tags=19%, list=16%, signal=22%
REACTOME_SENSORY_PROCESSING_OF_SOUND_BY_OUTER_HAIR_CELLS_OF_THE_COCHLEA	REACTOME_SENSORY_PROCESSING_OF_SOUND_BY_OUTER_HAIR_CELLS_OF_THE_COCHLEA		46	0.232503	0.791507	0.80198	0.935465	1	3031	tags=15%, list=12%, signal=17%
REACTOME_MITOTIC_SPINDLE_CHECKPOINT	REACTOME_MITOTIC_SPINDLE_CHECKPOINT		106	0.201466	0.791011	0.842173	0.935173	1	3921	tags=16%, list=15%, signal=19%
REACTOME_HSP90_CHAPERONE_CYCLE_FOR_STEROID_HORMONE_RECEPTORS_SHR	REACTOME_HSP90_CHAPERONE_CYCLE_FOR_STEROID_HORMONE_RECEPTORS_SHR		52	0.224349	0.789245	0.828854	0.936986	1	4628	tags=21%, list=18%, signal=26%
REACTOME_SHC1_EVENTS_IN_ERBB2_SIGNALING	REACTOME_SHC1_EVENTS_IN_ERBB2_SIGNALING		21	0.274661	0.788741	0.762458	0.936681	1	7182	tags=43%, list=28%, signal=59%
REACTOME_RUNX2_REGULATES_BONE_DEVELOPMENT	REACTOME_RUNX2_REGULATES_BONE_DEVELOPMENT		29	0.253549	0.788487	0.766091	0.93594	1	3235	tags=17%, list=13%, signal=20%
REACTOME_BETA_CATENIN_PHOSPHORYLATION_CASCADE	REACTOME_BETA_CATENIN_PHOSPHORYLATION_CASCADE		17	0.289755	0.788409	0.74376	0.93492	1	2816	tags=18%, list=11%, signal=20%
REACTOME_REGULATION_OF_BETA_CELL_DEVELOPMENT	REACTOME_REGULATION_OF_BETA_CELL_DEVELOPMENT		33	0.243735	0.787739	0.783186	0.934852	1	5961	tags=24%, list=23%, signal=32%
REACTOME_REGULATION_OF_FZD_BY_UBIQUITINATION	REACTOME_REGULATION_OF_FZD_BY_UBIQUITINATION		20	0.274544	0.786863	0.772798	0.935148	1	6443	tags=30%, list=25%, signal=40%
REACTOME_RESOLUTION_OF_D_LOOP_STRUCTURES_THROUGH_SYNTHESIS_DEPENDENT_STRAND_ANNEALING_SDSA	REACTOME_RESOLUTION_OF_D_LOOP_STRUCTURES_THROUGH_SYNTHESIS_DEPENDENT_STRAND_ANNEALING_SDSA		25	0.263684	0.783675	0.792393	0.939037	1	5224	tags=28%, list=20%, signal=35%
KEGG_BIOSYNTHESIS_OF_UNSATURATED_FATTY_ACIDS	KEGG_BIOSYNTHESIS_OF_UNSATURATED_FATTY_ACIDS		22	0.263264	0.783227	0.770492	0.938611	1	6904	tags=41%, list=27%, signal=56%
REACTOME_COOPERATION_OF_PDCL_PHLP1_AND_TRIC_CCT_IN_G_PROTEIN_BETA_FOLDING	REACTOME_COOPERATION_OF_PDCL_PHLP1_AND_TRIC_CCT_IN_G_PROTEIN_BETA_FOLDING		35	0.241448	0.783114	0.791728	0.937651	1	5627	tags=29%, list=22%, signal=37%
REACTOME_FORMATION_OF_TUBULIN_FOLDING_INTERMEDIATES_BY_CCT_TRIC	REACTOME_FORMATION_OF_TUBULIN_FOLDING_INTERMEDIATES_BY_CCT_TRIC		24	0.263491	0.782896	0.744076	0.93687	1	4012	tags=17%, list=16%, signal=20%
REACTOME_INTERLEUKIN_2_FAMILY_SIGNALING	REACTOME_INTERLEUKIN_2_FAMILY_SIGNALING		38	0.239741	0.779809	0.788774	0.940649	1	7040	tags=34%, list=27%, signal=47%
REACTOME_G_PROTEIN_BETA_GAMMA_SIGNALLING	REACTOME_G_PROTEIN_BETA_GAMMA_SIGNALLING		29	0.249835	0.778582	0.791022	0.941512	1	5288	tags=31%, list=21%, signal=39%
REACTOME_DNA_DOUBLE_STRAND_BREAK_REPAIR	REACTOME_DNA_DOUBLE_STRAND_BREAK_REPAIR		129	0.191735	0.77629	0.888191	0.943943	1	6443	tags=30%, list=25%, signal=40%
REACTOME_REGULATION_OF_TP53_ACTIVITY_THROUGH_PHOSPHORYLATION	REACTOME_REGULATION_OF_TP53_ACTIVITY_THROUGH_PHOSPHORYLATION		91	0.203689	0.771352	0.86606	0.950517	1	3461	tags=16%, list=13%, signal=19%
REACTOME_CDC42_GTPASE_CYCLE	REACTOME_CDC42_GTPASE_CYCLE		156	0.188507	0.770879	0.907032	0.950104	1	5682	tags=21%, list=22%, signal=26%
REACTOME_GABA_SYNTHESIS_RELEASE_REUPTAKE_AND_DEGRADATION	REACTOME_GABA_SYNTHESIS_RELEASE_REUPTAKE_AND_DEGRADATION		17	0.279723	0.769597	0.775777	0.950887	1	7581	tags=41%, list=30%, signal=58%
REACTOME_RHO_GTPASES_ACTIVATE_NADPH_OXIDASES	REACTOME_RHO_GTPASES_ACTIVATE_NADPH_OXIDASES		23	0.2569	0.769511	0.789223	0.949864	1	2570	tags=13%, list=10%, signal=14%
REACTOME_KSRP_KHSRP_BINDS_AND_DESTABILIZES_MRNA	REACTOME_KSRP_KHSRP_BINDS_AND_DESTABILIZES_MRNA		17	0.280205	0.766868	0.787375	0.952715	1	2268	tags=18%, list=9%, signal=19%
REACTOME_INFECTION_WITH_MYCOBACTERIUM_TUBERCULOSIS	REACTOME_INFECTION_WITH_MYCOBACTERIUM_TUBERCULOSIS		26	0.248315	0.766324	0.80402	0.952339	1	7550	tags=38%, list=29%, signal=54%
REACTOME_ACTIVATION_OF_SMO	REACTOME_ACTIVATION_OF_SMO		15	0.291859	0.766002	0.754358	0.95168	1	666	tags=7%, list=3%, signal=7%
REACTOME_RESPONSE_OF_MTB_TO_PHAGOCYTOSIS	REACTOME_RESPONSE_OF_MTB_TO_PHAGOCYTOSIS		22	0.261244	0.765138	0.799342	0.951742	1	7550	tags=41%, list=29%, signal=58%
REACTOME_BUTYRATE_RESPONSE_FACTOR_1_BRF1_BINDS_AND_DESTABILIZES_MRNA	REACTOME_BUTYRATE_RESPONSE_FACTOR_1_BRF1_BINDS_AND_DESTABILIZES_MRNA		17	0.275152	0.764906	0.772955	0.950963	1	6224	tags=35%, list=24%, signal=47%
REACTOME_FOXO_MEDIATED_TRANSCRIPTION_OF_OXIDATIVE_STRESS_METABOLIC_AND_NEURONAL_GENES	REACTOME_FOXO_MEDIATED_TRANSCRIPTION_OF_OXIDATIVE_STRESS_METABOLIC_AND_NEURONAL_GENES		28	0.248623	0.763651	0.804241	0.951702	1	5390	tags=29%, list=21%, signal=36%
REACTOME_SIGNALING_BY_TYPE_1_INSULIN_LIKE_GROWTH_FACTOR_1_RECEPTOR_IGF1R	REACTOME_SIGNALING_BY_TYPE_1_INSULIN_LIKE_GROWTH_FACTOR_1_RECEPTOR_IGF1R		47	0.219893	0.762609	0.850214	0.952097	1	6347	tags=28%, list=25%, signal=37%
KEGG_PROGESTERONE_MEDIATED_OOCYTE_MATURATION	KEGG_PROGESTERONE_MEDIATED_OOCYTE_MATURATION		81	0.202128	0.759353	0.880309	0.95561	1	3944	tags=14%, list=15%, signal=16%
REACTOME_G_ALPHA_12_13_SIGNALLING_EVENTS	REACTOME_G_ALPHA_12_13_SIGNALLING_EVENTS		76	0.204247	0.759094	0.871099	0.954847	1	4774	tags=21%, list=19%, signal=26%
REACTOME_INHIBITION_OF_THE_PROTEOLYTIC_ACTIVITY_OF_APC_C_REQUIRED_FOR_THE_ONSET_OF_ANAPHASE_BY_MITOTIC_SPINDLE_CHECKPOINT_COMPONENTS	REACTOME_INHIBITION_OF_THE_PROTEOLYTIC_ACTIVITY_OF_APC_C_REQUIRED_FOR_THE_ONSET_OF_ANAPHASE_BY_MITOTIC_SPINDLE_CHECKPOINT_COMPONENTS		21	0.262708	0.758939	0.781403	0.953922	1	3018	tags=19%, list=12%, signal=22%
REACTOME_REGULATION_OF_KIT_SIGNALING	REACTOME_REGULATION_OF_KIT_SIGNALING		16	0.279591	0.757833	0.804054	0.954372	1	7450	tags=50%, list=29%, signal=70%
REACTOME_CLASS_C_3_METABOTROPIC_GLUTAMATE_PHEROMONE_RECEPTORS	REACTOME_CLASS_C_3_METABOTROPIC_GLUTAMATE_PHEROMONE_RECEPTORS		18	0.261808	0.757009	0.80198	0.954418	1	816	tags=11%, list=3%, signal=11%
REACTOME_APC_CDC20_MEDIATED_DEGRADATION_OF_NEK2A	REACTOME_APC_CDC20_MEDIATED_DEGRADATION_OF_NEK2A		26	0.247232	0.75596	0.802774	0.954685	1	8429	tags=50%, list=33%, signal=74%
REACTOME_HDR_THROUGH_SINGLE_STRAND_ANNEALING_SSA	REACTOME_HDR_THROUGH_SINGLE_STRAND_ANNEALING_SSA		36	0.229167	0.755917	0.825826	0.953606	1	5551	tags=28%, list=22%, signal=35%
KEGG_PRIMARY_IMMUNODEFICIENCY	KEGG_PRIMARY_IMMUNODEFICIENCY		33	0.237028	0.754661	0.816794	0.954221	1	2671	tags=15%, list=10%, signal=17%
REACTOME_CREB1_PHOSPHORYLATION_THROUGH_NMDA_RECEPTOR_MEDIATED_ACTIVATION_OF_RAS_SIGNALING	REACTOME_CREB1_PHOSPHORYLATION_THROUGH_NMDA_RECEPTOR_MEDIATED_ACTIVATION_OF_RAS_SIGNALING		28	0.246025	0.751934	0.812866	0.956832	1	940	tags=11%, list=4%, signal=11%
REACTOME_SEMA3A_PAK_DEPENDENT_AXON_REPULSION	REACTOME_SEMA3A_PAK_DEPENDENT_AXON_REPULSION		16	0.280506	0.751344	0.78282	0.956542	1	4321	tags=31%, list=17%, signal=38%
REACTOME_NCAM1_INTERACTIONS	REACTOME_NCAM1_INTERACTIONS		38	0.233187	0.750786	0.850789	0.956109	1	6958	tags=32%, list=27%, signal=43%
REACTOME_IRS_MEDIATED_SIGNALLING	REACTOME_IRS_MEDIATED_SIGNALLING		41	0.228992	0.750346	0.840774	0.955576	1	6347	tags=29%, list=25%, signal=39%
REACTOME_DISEASES_ASSOCIATED_WITH_GLYCOSAMINOGLYCAN_METABOLISM	REACTOME_DISEASES_ASSOCIATED_WITH_GLYCOSAMINOGLYCAN_METABOLISM		39	0.231053	0.748656	0.838806	0.95663	1	5919	tags=28%, list=23%, signal=37%
REACTOME_NRAGE_SIGNALS_DEATH_THROUGH_JNK	REACTOME_NRAGE_SIGNALS_DEATH_THROUGH_JNK		58	0.212067	0.747904	0.873745	0.956533	1	2814	tags=14%, list=11%, signal=15%
REACTOME_SYNDECAN_INTERACTIONS	REACTOME_SYNDECAN_INTERACTIONS		27	0.248588	0.745562	0.79845	0.958533	1	8775	tags=48%, list=34%, signal=73%
REACTOME_METABOLISM_OF_COFACTORS	REACTOME_METABOLISM_OF_COFACTORS		19	0.264381	0.745044	0.811037	0.958121	1	3343	tags=26%, list=13%, signal=30%
KEGG_HUNTINGTONS_DISEASE	KEGG_HUNTINGTONS_DISEASE		160	0.180578	0.744499	0.933833	0.957634	1	6636	tags=29%, list=26%, signal=39%
HALLMARK_G2M_CHECKPOINT	HALLMARK_G2M_CHECKPOINT		188	0.174686	0.742917	0.954118	0.958624	1	6568	tags=26%, list=26%, signal=35%
REACTOME_SIGNALING_BY_NUCLEAR_RECEPTORS	REACTOME_SIGNALING_BY_NUCLEAR_RECEPTORS		220	0.171743	0.742224	0.961403	0.958388	1	4859	tags=18%, list=19%, signal=22%
HALLMARK_BILE_ACID_METABOLISM	HALLMARK_BILE_ACID_METABOLISM		103	0.188233	0.736963	0.937581	0.963938	1	5710	tags=23%, list=22%, signal=30%
REACTOME_MHC_CLASS_II_ANTIGEN_PRESENTATION	REACTOME_MHC_CLASS_II_ANTIGEN_PRESENTATION		117	0.184625	0.734477	0.914286	0.96601	1	4979	tags=19%, list=19%, signal=23%
REACTOME_DAP12_INTERACTIONS	REACTOME_DAP12_INTERACTIONS		38	0.222711	0.734242	0.857357	0.965156	1	7058	tags=34%, list=27%, signal=47%
KRAS.LUNG.BREAST_UP.V1_DN	KRAS.LUNG.BREAST_UP.V1_DN		109	0.190188	0.734176	0.933419	0.964108	1	3244	tags=11%, list=13%, signal=13%
REACTOME_NUCLEOBASE_CATABOLISM	REACTOME_NUCLEOBASE_CATABOLISM		33	0.228937	0.733062	0.87017	0.964301	1	6029	tags=27%, list=23%, signal=36%
REACTOME_DISASSEMBLY_OF_THE_DESTRUCTION_COMPLEX_AND_RECRUITMENT_OF_AXIN_TO_THE_MEMBRANE	REACTOME_DISASSEMBLY_OF_THE_DESTRUCTION_COMPLEX_AND_RECRUITMENT_OF_AXIN_TO_THE_MEMBRANE		29	0.234551	0.732643	0.825119	0.963715	1	5915	tags=28%, list=23%, signal=36%
REACTOME_SIGNALING_BY_NOTCH1_PEST_DOMAIN_MUTANTS_IN_CANCER	REACTOME_SIGNALING_BY_NOTCH1_PEST_DOMAIN_MUTANTS_IN_CANCER		58	0.205744	0.732547	0.887798	0.962701	1	5961	tags=28%, list=23%, signal=36%
REACTOME_REGULATION_OF_TP53_ACTIVITY_THROUGH_METHYLATION	REACTOME_REGULATION_OF_TP53_ACTIVITY_THROUGH_METHYLATION		18	0.266521	0.732313	0.833603	0.961836	1	6655	tags=44%, list=26%, signal=60%
REACTOME_NR1H3_NR1H2_REGULATE_GENE_EXPRESSION_LINKED_TO_CHOLESTEROL_TRANSPORT_AND_EFFLUX	REACTOME_NR1H3_NR1H2_REGULATE_GENE_EXPRESSION_LINKED_TO_CHOLESTEROL_TRANSPORT_AND_EFFLUX		35	0.221865	0.732111	0.869029	0.960956	1	7038	tags=29%, list=27%, signal=39%
KEGG_PROXIMAL_TUBULE_BICARBONATE_RECLAMATION	KEGG_PROXIMAL_TUBULE_BICARBONATE_RECLAMATION		19	0.265743	0.730549	0.823141	0.961723	1	8226	tags=47%, list=32%, signal=70%
REACTOME_RHOA_GTPASE_CYCLE	REACTOME_RHOA_GTPASE_CYCLE		144	0.176293	0.728078	0.952147	0.96342	1	5682	tags=21%, list=22%, signal=27%
REACTOME_HS_GAG_DEGRADATION	REACTOME_HS_GAG_DEGRADATION		20	0.254148	0.728063	0.819536	0.962317	1	5919	tags=30%, list=23%, signal=39%
YAP1_DN	YAP1_DN		38	0.219687	0.726446	0.877219	0.963066	1	7400	tags=34%, list=29%, signal=48%
REACTOME_INTERLEUKIN_3_INTERLEUKIN_5_AND_GM_CSF_SIGNALING	REACTOME_INTERLEUKIN_3_INTERLEUKIN_5_AND_GM_CSF_SIGNALING		44	0.215271	0.725538	0.877729	0.963024	1	7040	tags=39%, list=27%, signal=53%
KEGG_OXIDATIVE_PHOSPHORYLATION	KEGG_OXIDATIVE_PHOSPHORYLATION		107	0.183458	0.72132	0.932051	0.966676	1	7025	tags=34%, list=27%, signal=46%
REACTOME_DEFECTIVE_B4GALT7_CAUSES_EDS_PROGEROID_TYPE	REACTOME_DEFECTIVE_B4GALT7_CAUSES_EDS_PROGEROID_TYPE		18	0.259115	0.720897	0.819334	0.965994	1	3116	tags=17%, list=12%, signal=19%
KEGG_FC_EPSILON_RI_SIGNALING_PATHWAY	KEGG_FC_EPSILON_RI_SIGNALING_PATHWAY		68	0.196996	0.718682	0.914326	0.967215	1	7385	tags=34%, list=29%, signal=47%
REACTOME_SIGNAL_TRANSDUCTION_BY_L1	REACTOME_SIGNAL_TRANSDUCTION_BY_L1		21	0.246198	0.71674	0.853621	0.968229	1	4783	tags=19%, list=19%, signal=23%
REACTOME_GENERATION_OF_SECOND_MESSENGER_MOLECULES	REACTOME_GENERATION_OF_SECOND_MESSENGER_MOLECULES		32	0.219857	0.716324	0.887218	0.967609	1	7930	tags=47%, list=31%, signal=68%
REACTOME_SIGNALING_BY_ERYTHROPOIETIN	REACTOME_SIGNALING_BY_ERYTHROPOIETIN		24	0.241861	0.715466	0.876175	0.967368	1	7101	tags=38%, list=28%, signal=52%
REACTOME_PKMTS_METHYLATE_HISTONE_LYSINES	REACTOME_PKMTS_METHYLATE_HISTONE_LYSINES		38	0.215761	0.715094	0.881406	0.966657	1	982	tags=8%, list=4%, signal=8%
REACTOME_CYTOCHROME_P450_ARRANGED_BY_SUBSTRATE_TYPE	REACTOME_CYTOCHROME_P450_ARRANGED_BY_SUBSTRATE_TYPE		45	0.208395	0.714976	0.898403	0.965681	1	7793	tags=29%, list=30%, signal=41%
REACTOME_OLFACTORY_SIGNALING_PATHWAY	REACTOME_OLFACTORY_SIGNALING_PATHWAY		31	0.225844	0.71388	0.874233	0.96573	1	3244	tags=10%, list=13%, signal=11%
REACTOME_NON_INTEGRIN_MEMBRANE_ECM_INTERACTIONS	REACTOME_NON_INTEGRIN_MEMBRANE_ECM_INTERACTIONS		57	0.201722	0.713722	0.90884	0.964799	1	8775	tags=46%, list=34%, signal=69%
REACTOME_G0_AND_EARLY_G1	REACTOME_G0_AND_EARLY_G1		27	0.227855	0.713697	0.869632	0.963734	1	1859	tags=11%, list=7%, signal=12%
ESC_J1_UP_EARLY.V1_UP	ESC_J1_UP_EARLY.V1_UP		145	0.174924	0.712171	0.956962	0.964223	1	1800	tags=8%, list=7%, signal=8%
REACTOME_AMINO_ACID_TRANSPORT_ACROSS_THE_PLASMA_MEMBRANE	REACTOME_AMINO_ACID_TRANSPORT_ACROSS_THE_PLASMA_MEMBRANE		26	0.233055	0.707666	0.875	0.967662	1	2438	tags=15%, list=9%, signal=17%
KEGG_GLIOMA	KEGG_GLIOMA		63	0.196968	0.70721	0.917598	0.966991	1	7623	tags=33%, list=30%, signal=47%
REACTOME_REGULATION_OF_INSULIN_LIKE_GROWTH_FACTOR_IGF_TRANSPORT_AND_UPTAKE_BY_INSULIN_LIKE_GROWTH_FACTOR_BINDING_PROTEINS_IGFBPS	REACTOME_REGULATION_OF_INSULIN_LIKE_GROWTH_FACTOR_IGF_TRANSPORT_AND_UPTAKE_BY_INSULIN_LIKE_GROWTH_FACTOR_BINDING_PROTEINS_IGFBPS		99	0.181172	0.703117	0.956975	0.969874	1	6472	tags=21%, list=25%, signal=28%
REACTOME_CRMPS_IN_SEMA3A_SIGNALING	REACTOME_CRMPS_IN_SEMA3A_SIGNALING		15	0.26513	0.701954	0.869491	0.969831	1	7679	tags=40%, list=30%, signal=57%
REACTOME_RESOLUTION_OF_D_LOOP_STRUCTURES	REACTOME_RESOLUTION_OF_D_LOOP_STRUCTURES		33	0.218384	0.697925	0.886329	0.972423	1	5224	tags=24%, list=20%, signal=30%
REACTOME_PROCESSIVE_SYNTHESIS_ON_THE_LAGGING_STRAND	REACTOME_PROCESSIVE_SYNTHESIS_ON_THE_LAGGING_STRAND		15	0.261298	0.696624	0.835871	0.972503	1	2155	tags=13%, list=8%, signal=15%
BCAT.100_UP.V1_DN	BCAT.100_UP.V1_DN		25	0.231226	0.69661	0.882353	0.971414	1	6770	tags=28%, list=26%, signal=38%
KEGG_DNA_REPLICATION	KEGG_DNA_REPLICATION		36	0.212514	0.69325	0.882883	0.973308	1	8834	tags=44%, list=34%, signal=68%
REACTOME_MET_ACTIVATES_PTK2_SIGNALING	REACTOME_MET_ACTIVATES_PTK2_SIGNALING		29	0.222542	0.69317	0.887675	0.972277	1	8615	tags=52%, list=34%, signal=78%
KEGG_PPAR_SIGNALING_PATHWAY	KEGG_PPAR_SIGNALING_PATHWAY		55	0.196336	0.692739	0.935065	0.971558	1	4199	tags=18%, list=16%, signal=22%
REACTOME_POSITIVE_EPIGENETIC_REGULATION_OF_RRNA_EXPRESSION	REACTOME_POSITIVE_EPIGENETIC_REGULATION_OF_RRNA_EXPRESSION		43	0.200766	0.692133	0.914706	0.970987	1	4087	tags=21%, list=16%, signal=25%
REACTOME_ANTIMICROBIAL_PEPTIDES	REACTOME_ANTIMICROBIAL_PEPTIDES		42	0.205073	0.691249	0.887023	0.970691	1	4194	tags=14%, list=16%, signal=17%
REACTOME_REGULATION_OF_SIGNALING_BY_CBL	REACTOME_REGULATION_OF_SIGNALING_BY_CBL		22	0.233028	0.684658	0.886435	0.975053	1	6443	tags=36%, list=25%, signal=48%
REACTOME_PLATELET_SENSITIZATION_BY_LDL	REACTOME_PLATELET_SENSITIZATION_BY_LDL		17	0.250652	0.681946	0.868601	0.976011	1	8219	tags=53%, list=32%, signal=78%
REACTOME_ADHERENS_JUNCTIONS_INTERACTIONS	REACTOME_ADHERENS_JUNCTIONS_INTERACTIONS		26	0.226199	0.681906	0.902778	0.974946	1	7501	tags=31%, list=29%, signal=43%
REACTOME_LDL_CLEARANCE	REACTOME_LDL_CLEARANCE		19	0.241743	0.679181	0.862745	0.975931	1	1712	tags=11%, list=7%, signal=11%
REACTOME_COPI_INDEPENDENT_GOLGI_TO_ER_RETROGRADE_TRAFFIC	REACTOME_COPI_INDEPENDENT_GOLGI_TO_ER_RETROGRADE_TRAFFIC		48	0.196143	0.677785	0.935351	0.975879	1	4012	tags=19%, list=16%, signal=22%
KEGG_GLYCEROLIPID_METABOLISM	KEGG_GLYCEROLIPID_METABOLISM		43	0.200548	0.676932	0.921429	0.975413	1	4845	tags=19%, list=19%, signal=23%
PRC2_SUZ12_UP.V1_UP	PRC2_SUZ12_UP.V1_UP		157	0.162173	0.6739	0.985577	0.976515	1	5894	tags=21%, list=23%, signal=27%
REACTOME_TP53_REGULATES_TRANSCRIPTION_OF_CELL_CYCLE_GENES	REACTOME_TP53_REGULATES_TRANSCRIPTION_OF_CELL_CYCLE_GENES		48	0.19523	0.669434	0.924198	0.978623	1	6414	tags=29%, list=25%, signal=39%
REACTOME_APOPTOTIC_FACTOR_MEDIATED_RESPONSE	REACTOME_APOPTOTIC_FACTOR_MEDIATED_RESPONSE		18	0.239528	0.666414	0.883465	0.979579	1	1771	tags=11%, list=7%, signal=12%
REACTOME_ARACHIDONIC_ACID_METABOLISM	REACTOME_ARACHIDONIC_ACID_METABOLISM		47	0.195376	0.665702	0.920943	0.978977	1	2616	tags=11%, list=10%, signal=12%
KEGG_GLYCINE_SERINE_AND_THREONINE_METABOLISM	KEGG_GLYCINE_SERINE_AND_THREONINE_METABOLISM		27	0.216954	0.664704	0.894737	0.978531	1	6452	tags=26%, list=25%, signal=35%
REACTOME_PHASE_I_FUNCTIONALIZATION_OF_COMPOUNDS	REACTOME_PHASE_I_FUNCTIONALIZATION_OF_COMPOUNDS		76	0.178004	0.663801	0.963265	0.978048	1	6259	tags=22%, list=24%, signal=29%
REACTOME_A_TETRASACCHARIDE_LINKER_SEQUENCE_IS_REQUIRED_FOR_GAG_SYNTHESIS	REACTOME_A_TETRASACCHARIDE_LINKER_SEQUENCE_IS_REQUIRED_FOR_GAG_SYNTHESIS		24	0.221717	0.66341	0.905488	0.977236	1	3116	tags=17%, list=12%, signal=19%
REACTOME_INSULIN_RECEPTOR_SIGNALLING_CASCADE	REACTOME_INSULIN_RECEPTOR_SIGNALLING_CASCADE		46	0.196388	0.661896	0.938834	0.977128	1	6347	tags=26%, list=25%, signal=35%
REACTOME_CYCLIN_A_B1_B2_ASSOCIATED_EVENTS_DURING_G2_M_TRANSITION	REACTOME_CYCLIN_A_B1_B2_ASSOCIATED_EVENTS_DURING_G2_M_TRANSITION		25	0.221673	0.660714	0.898596	0.976798	1	5236	tags=20%, list=20%, signal=25%
KEGG_STEROID_BIOSYNTHESIS	KEGG_STEROID_BIOSYNTHESIS		17	0.240677	0.659969	0.866883	0.976149	1	8434	tags=47%, list=33%, signal=70%
REACTOME_NUCLEAR_SIGNALING_BY_ERBB4	REACTOME_NUCLEAR_SIGNALING_BY_ERBB4		31	0.206239	0.658098	0.937213	0.976202	1	6214	tags=26%, list=24%, signal=34%
REACTOME_SIGNALING_BY_ERBB4	REACTOME_SIGNALING_BY_ERBB4		55	0.182733	0.655981	0.961151	0.976473	1	6443	tags=25%, list=25%, signal=34%
HALLMARK_WNT_BETA_CATENIN_SIGNALING	HALLMARK_WNT_BETA_CATENIN_SIGNALING		41	0.192612	0.653234	0.949254	0.977138	1	5961	tags=27%, list=23%, signal=35%
REACTOME_G_BETA_GAMMA_SIGNALLING_THROUGH_PI3KGAMMA	REACTOME_G_BETA_GAMMA_SIGNALLING_THROUGH_PI3KGAMMA		22	0.218642	0.645085	0.932149	0.980724	1	5288	tags=27%, list=21%, signal=34%
REACTOME_DIGESTION_AND_ABSORPTION	REACTOME_DIGESTION_AND_ABSORPTION		17	0.23476	0.643795	0.892971	0.980341	1	3140	tags=18%, list=12%, signal=20%
KEGG_ARGININE_AND_PROLINE_METABOLISM	KEGG_ARGININE_AND_PROLINE_METABOLISM		48	0.187083	0.640655	0.968436	0.980885	1	5447	tags=21%, list=21%, signal=26%
REACTOME_PLASMA_LIPOPROTEIN_REMODELING	REACTOME_PLASMA_LIPOPROTEIN_REMODELING		23	0.218515	0.63326	0.929739	0.983531	1	6354	tags=30%, list=25%, signal=40%
REACTOME_PCNA_DEPENDENT_LONG_PATCH_BASE_EXCISION_REPAIR	REACTOME_PCNA_DEPENDENT_LONG_PATCH_BASE_EXCISION_REPAIR		21	0.216721	0.626809	0.928453	0.985357	1	2155	tags=14%, list=8%, signal=16%
KEGG_OLFACTORY_TRANSDUCTION	KEGG_OLFACTORY_TRANSDUCTION		47	0.183581	0.626117	0.95461	0.984599	1	5348	tags=17%, list=21%, signal=21%
REACTOME_OTHER_SEMAPHORIN_INTERACTIONS	REACTOME_OTHER_SEMAPHORIN_INTERACTIONS		19	0.221728	0.624946	0.919355	0.984026	1	7679	tags=42%, list=30%, signal=60%
REACTOME_RECOGNITION_OF_DNA_DAMAGE_BY_PCNA_CONTAINING_REPLICATION_COMPLEX	REACTOME_RECOGNITION_OF_DNA_DAMAGE_BY_PCNA_CONTAINING_REPLICATION_COMPLEX		30	0.198995	0.617518	0.961059	0.986047	1	8672	tags=40%, list=34%, signal=60%
REACTOME_DEGRADATION_OF_THE_EXTRACELLULAR_MATRIX	REACTOME_DEGRADATION_OF_THE_EXTRACELLULAR_MATRIX		121	0.152476	0.613041	0.996178	0.986746	1	7086	tags=27%, list=28%, signal=37%
REACTOME_CGMP_EFFECTS	REACTOME_CGMP_EFFECTS		15	0.230254	0.605337	0.931894	0.988589	1	643	tags=7%, list=3%, signal=7%
KEGG_BASAL_CELL_CARCINOMA	KEGG_BASAL_CELL_CARCINOMA		49	0.174603	0.604687	0.979856	0.98773	1	6734	tags=24%, list=26%, signal=33%
KEGG_THYROID_CANCER	KEGG_THYROID_CANCER		28	0.189047	0.590648	0.965245	0.991094	1	8740	tags=39%, list=34%, signal=59%
REACTOME_GAP_FILLING_DNA_REPAIR_SYNTHESIS_AND_LIGATION_IN_GG_NER	REACTOME_GAP_FILLING_DNA_REPAIR_SYNTHESIS_AND_LIGATION_IN_GG_NER		25	0.19686	0.589267	0.964506	0.990435	1	7277	tags=32%, list=28%, signal=45%
REACTOME_XENOBIOTICS	REACTOME_XENOBIOTICS		16	0.218308	0.5865	0.944625	0.990139	1	7793	tags=31%, list=30%, signal=45%
REACTOME_INSERTION_OF_TAIL_ANCHORED_PROTEINS_INTO_THE_ENDOPLASMIC_RETICULUM_MEMBRANE	REACTOME_INSERTION_OF_TAIL_ANCHORED_PROTEINS_INTO_THE_ENDOPLASMIC_RETICULUM_MEMBRANE		20	0.206821	0.577526	0.955485	0.991393	1	5489	tags=25%, list=21%, signal=32%
REACTOME_NITRIC_OXIDE_STIMULATES_GUANYLATE_CYCLASE	REACTOME_NITRIC_OXIDE_STIMULATES_GUANYLATE_CYCLASE		18	0.203135	0.568527	0.96173	0.992369	1	643	tags=6%, list=3%, signal=6%
REACTOME_NR1H2_AND_NR1H3_MEDIATED_SIGNALING	REACTOME_NR1H2_AND_NR1H3_MEDIATED_SIGNALING		44	0.16705	0.563288	0.988131	0.992429	1	1389	tags=7%, list=5%, signal=7%
REACTOME_CELLULAR_HEXOSE_TRANSPORT	REACTOME_CELLULAR_HEXOSE_TRANSPORT		16	0.209384	0.554886	0.961083	0.992994	1	10076	tags=63%, list=39%, signal=103%
REACTOME_AFLATOXIN_ACTIVATION_AND_DETOXIFICATION	REACTOME_AFLATOXIN_ACTIVATION_AND_DETOXIFICATION		18	0.188381	0.523081	0.977049	0.996759	1	6784	tags=28%, list=26%, signal=38%
KEGG_ABC_TRANSPORTERS	KEGG_ABC_TRANSPORTERS		44	0.149788	0.509302	0.995665	0.997201	1	6862	tags=25%, list=27%, signal=34%
REACTOME_COLLAGEN_CHAIN_TRIMERIZATION	REACTOME_COLLAGEN_CHAIN_TRIMERIZATION		41	0.151141	0.507918	0.997041	0.996247	1	8576	tags=44%, list=33%, signal=66%
REACTOME_PLATELET_ADHESION_TO_EXPOSED_COLLAGEN	REACTOME_PLATELET_ADHESION_TO_EXPOSED_COLLAGEN		15	0.176975	0.45453	0.993432	0.998425	1	8508	tags=47%, list=33%, signal=70%

## Sheet: Table S2
Supplementary Table 2. Functional enrichment of NDMM patients with CRBN del10 vs WT CRBN patients in Toulouse cohort
NAME	GS<br> follow link to MSigDB	GS DETAILS	SIZE	ES	NES	NOM p-val	FDR q-val	FWER p-val	RANK AT MAX	LEADING EDGE
HALLMARK_TNFA_SIGNALING_VIA_NFKB	HALLMARK_TNFA_SIGNALING_VIA_NFKB	Details ...	192	0.632619	3.46613	0	0	0	2538	tags=47%, list=13%, signal=53%
REACTOME_INITIAL_TRIGGERING_OF_COMPLEMENT	REACTOME_INITIAL_TRIGGERING_OF_COMPLEMENT	Details ...	72	0.618949	2.83358	0	0	0	5739	tags=72%, list=29%, signal=102%
REACTOME_FCGR_ACTIVATION	REACTOME_FCGR_ACTIVATION	Details ...	69	0.609958	2.80281	0	0	0	5739	tags=71%, list=29%, signal=100%
REACTOME_CREATION_OF_C4_AND_C2_ACTIVATORS	REACTOME_CREATION_OF_C4_AND_C2_ACTIVATORS	Details ...	64	0.618925	2.77365	0	0	0	5739	tags=73%, list=29%, signal=103%
REACTOME_SCAVENGING_OF_HEME_FROM_PLASMA	REACTOME_SCAVENGING_OF_HEME_FROM_PLASMA	Details ...	68	0.578436	2.63263	0	0	0	5913	tags=63%, list=30%, signal=90%
REACTOME_CD22_MEDIATED_BCR_REGULATION	REACTOME_CD22_MEDIATED_BCR_REGULATION	Details ...	61	0.578597	2.60769	0	0	0	5739	tags=72%, list=29%, signal=102%
KEGG_GRAFT_VERSUS_HOST_DISEASE	KEGG_GRAFT_VERSUS_HOST_DISEASE	Details ...	31	0.677322	2.60159	0	0	0	4295	tags=77%, list=22%, signal=99%
REACTOME_ROLE_OF_LAT2_NTAL_LAB_ON_CALCIUM_MOBILIZATION	REACTOME_ROLE_OF_LAT2_NTAL_LAB_ON_CALCIUM_MOBILIZATION	Details ...	70	0.538347	2.48295	0	0.000278266	0.001	5739	tags=67%, list=29%, signal=94%
REACTOME_COMPLEMENT_CASCADE	REACTOME_COMPLEMENT_CASCADE	Details ...	96	0.510189	2.46248	0	0.000247348	0.001	5739	tags=64%, list=29%, signal=89%
REACTOME_IMMUNOREGULATORY_INTERACTIONS_BETWEEN_A_LYMPHOID_AND_A_NON_LYMPHOID_CELL	REACTOME_IMMUNOREGULATORY_INTERACTIONS_BETWEEN_A_LYMPHOID_AND_A_NON_LYMPHOID_CELL	Details ...	164	0.454382	2.38477	0	0.00040417	0.002	5635	tags=54%, list=29%, signal=75%
REACTOME_BINDING_AND_UPTAKE_OF_LIGANDS_BY_SCAVENGER_RECEPTORS	REACTOME_BINDING_AND_UPTAKE_OF_LIGANDS_BY_SCAVENGER_RECEPTORS	Details ...	94	0.489827	2.38432	0	0.000367428	0.002	5913	tags=57%, list=30%, signal=82%
KEGG_ALLOGRAFT_REJECTION	KEGG_ALLOGRAFT_REJECTION	Details ...	28	0.631649	2.38346	0	0.000336809	0.002	4103	tags=64%, list=21%, signal=81%
KEGG_HEMATOPOIETIC_CELL_LINEAGE	KEGG_HEMATOPOIETIC_CELL_LINEAGE	Details ...	72	0.501525	2.297	0	0.0003109	0.002	3893	tags=44%, list=20%, signal=55%
HALLMARK_EPITHELIAL_MESENCHYMAL_TRANSITION	HALLMARK_EPITHELIAL_MESENCHYMAL_TRANSITION	Details ...	176	0.414476	2.25315	0	0.000812698	0.006	2636	tags=32%, list=13%, signal=36%
REACTOME_ROLE_OF_PHOSPHOLIPIDS_IN_PHAGOCYTOSIS	REACTOME_ROLE_OF_PHOSPHOLIPIDS_IN_PHAGOCYTOSIS	Details ...	81	0.472794	2.25064	0	0.000758518	0.006	5739	tags=59%, list=29%, signal=83%
REACTOME_INTERLEUKIN_10_SIGNALING	REACTOME_INTERLEUKIN_10_SIGNALING	Details ...	38	0.559605	2.24208	0	0.000950847	0.008	3136	tags=45%, list=16%, signal=53%
HALLMARK_TGF_BETA_SIGNALING	HALLMARK_TGF_BETA_SIGNALING	Details ...	52	0.506311	2.23273	0	0.000894915	0.008	4703	tags=62%, list=24%, signal=81%
HALLMARK_INFLAMMATORY_RESPONSE	HALLMARK_INFLAMMATORY_RESPONSE	Details ...	179	0.421934	2.22163	0	0.00094325	0.009	4900	tags=45%, list=25%, signal=60%
KEGG_AUTOIMMUNE_THYROID_DISEASE	KEGG_AUTOIMMUNE_THYROID_DISEASE	Details ...	29	0.584159	2.13613	0	0.00360177	0.036	4103	tags=59%, list=21%, signal=74%
KEGG_CYTOKINE_CYTOKINE_RECEPTOR_INTERACTION	KEGG_CYTOKINE_CYTOKINE_RECEPTOR_INTERACTION	Details ...	188	0.399418	2.12834	0	0.00361186	0.037	5274	tags=43%, list=27%, signal=58%
REACTOME_INTERLEUKIN_4_AND_INTERLEUKIN_13_SIGNALING	REACTOME_INTERLEUKIN_4_AND_INTERLEUKIN_13_SIGNALING		96	0.434423	2.12395	0	0.00343987	0.037	3672	tags=39%, list=19%, signal=47%
REACTOME_FCGR3A_MEDIATED_IL10_SYNTHESIS	REACTOME_FCGR3A_MEDIATED_IL10_SYNTHESIS		93	0.425717	2.07924	0	0.00473858	0.052	5739	tags=56%, list=29%, signal=79%
REACTOME_CHEMOKINE_RECEPTORS_BIND_CHEMOKINES	REACTOME_CHEMOKINE_RECEPTORS_BIND_CHEMOKINES		44	0.47592	2.04257	0	0.00676558	0.078	2400	tags=32%, list=12%, signal=36%
REACTOME_COLLAGEN_CHAIN_TRIMERIZATION	REACTOME_COLLAGEN_CHAIN_TRIMERIZATION		34	0.521212	2.04195	0	0.00648368	0.078	6059	tags=68%, list=31%, signal=98%
REACTOME_CIRCADIAN_CLOCK	REACTOME_CIRCADIAN_CLOCK		68	0.440808	2.03567	0	0.00674725	0.085	3143	tags=35%, list=16%, signal=42%
REACTOME_FCERI_MEDIATED_MAPK_ACTIVATION	REACTOME_FCERI_MEDIATED_MAPK_ACTIVATION		86	0.417805	2.03249	0	0.00677122	0.089	5739	tags=59%, list=29%, signal=83%
REACTOME_ANTIGEN_ACTIVATES_B_CELL_RECEPTOR_BCR_LEADING_TO_GENERATION_OF_SECOND_MESSENGERS	REACTOME_ANTIGEN_ACTIVATES_B_CELL_RECEPTOR_BCR_LEADING_TO_GENERATION_OF_SECOND_MESSENGERS		86	0.419277	2.02026	0	0.00764751	0.1	5739	tags=60%, list=29%, signal=85%
REACTOME_ANTI_INFLAMMATORY_RESPONSE_FAVOURING_LEISHMANIA_PARASITE_INFECTION	REACTOME_ANTI_INFLAMMATORY_RESPONSE_FAVOURING_LEISHMANIA_PARASITE_INFECTION		164	0.372422	2.00868	0	0.00824892	0.111	5322	tags=46%, list=27%, signal=63%
KEGG_NOD_LIKE_RECEPTOR_SIGNALING_PATHWAY	KEGG_NOD_LIKE_RECEPTOR_SIGNALING_PATHWAY		57	0.45067	1.98242	0	0.0103149	0.137	2578	tags=39%, list=13%, signal=44%
REACTOME_ASSEMBLY_OF_COLLAGEN_FIBRILS_AND_OTHER_MULTIMERIC_STRUCTURES	REACTOME_ASSEMBLY_OF_COLLAGEN_FIBRILS_AND_OTHER_MULTIMERIC_STRUCTURES		50	0.449109	1.96921	0	0.0114187	0.158	6059	tags=54%, list=31%, signal=78%
REACTOME_SIGNALING_BY_FLT3_FUSION_PROTEINS	REACTOME_SIGNALING_BY_FLT3_FUSION_PROTEINS		18	0.586666	1.94606	0	0.013339	0.187	2371	tags=56%, list=12%, signal=63%
REACTOME_FCERI_MEDIATED_CA_2_MOBILIZATION	REACTOME_FCERI_MEDIATED_CA_2_MOBILIZATION		85	0.399926	1.93392	0	0.014564	0.211	5739	tags=58%, list=29%, signal=81%
REACTOME_SIGNALING_BY_CSF3_G_CSF	REACTOME_SIGNALING_BY_CSF3_G_CSF		28	0.512194	1.92734	0.00387597	0.0149828	0.224	2371	tags=39%, list=12%, signal=45%
KEGG_TYPE_I_DIABETES_MELLITUS	KEGG_TYPE_I_DIABETES_MELLITUS		32	0.501096	1.91372	0	0.0163416	0.248	3541	tags=56%, list=18%, signal=68%
HALLMARK_APOPTOSIS	HALLMARK_APOPTOSIS		153	0.367138	1.90492	0	0.0176776	0.273	3825	tags=38%, list=19%, signal=47%
REACTOME_FLT3_SIGNALING	REACTOME_FLT3_SIGNALING		38	0.46929	1.90067	0	0.0178717	0.285	3707	tags=42%, list=19%, signal=52%
REACTOME_CROSSLINKING_OF_COLLAGEN_FIBRILS	REACTOME_CROSSLINKING_OF_COLLAGEN_FIBRILS		16	0.606054	1.89554	0.00322581	0.0182021	0.296	5753	tags=81%, list=29%, signal=115%
REACTOME_CD209_DC_SIGN_SIGNALING	REACTOME_CD209_DC_SIGN_SIGNALING		20	0.560314	1.8951	0	0.0177231	0.296	2839	tags=50%, list=14%, signal=58%
REACTOME_DOWNSTREAM_SIGNALING_OF_ACTIVATED_FGFR2	REACTOME_DOWNSTREAM_SIGNALING_OF_ACTIVATED_FGFR2		21	0.539069	1.88366	0.00380228	0.0191914	0.324	4795	tags=57%, list=24%, signal=75%
KEGG_JAK_STAT_SIGNALING_PATHWAY	KEGG_JAK_STAT_SIGNALING_PATHWAY		108	0.374331	1.88173	0	0.0191686	0.33	2846	tags=32%, list=14%, signal=38%
REACTOME_FLT3_SIGNALING_IN_DISEASE	REACTOME_FLT3_SIGNALING_IN_DISEASE		27	0.509712	1.88122	0.0110701	0.0188358	0.331	2371	tags=41%, list=12%, signal=46%
REACTOME_INWARDLY_RECTIFYING_K_CHANNELS	REACTOME_INWARDLY_RECTIFYING_K_CHANNELS		26	0.523582	1.87773	0.00369004	0.0188803	0.338	5446	tags=65%, list=28%, signal=90%
KEGG_ASTHMA	KEGG_ASTHMA		20	0.550211	1.87207	0.00346021	0.0192563	0.35	4103	tags=45%, list=21%, signal=57%
REACTOME_SIGNALING_BY_FLT3_ITD_AND_TKD_MUTANTS	REACTOME_SIGNALING_BY_FLT3_ITD_AND_TKD_MUTANTS		15	0.605358	1.8708	0.00593472	0.019026	0.353	2371	tags=53%, list=12%, signal=61%
REACTOME_SIGNALING_BY_NTRK2_TRKB	REACTOME_SIGNALING_BY_NTRK2_TRKB		23	0.525123	1.86754	0.00361011	0.0191896	0.365	3673	tags=57%, list=19%, signal=69%
REACTOME_SIGNALING_BY_MET	REACTOME_SIGNALING_BY_MET		75	0.392325	1.86274	0	0.0196147	0.377	3707	tags=37%, list=19%, signal=46%
HALLMARK_MYOGENESIS	HALLMARK_MYOGENESIS		162	0.350566	1.85383	0	0.020936	0.403	3925	tags=34%, list=20%, signal=42%
KEGG_INTESTINAL_IMMUNE_NETWORK_FOR_IGA_PRODUCTION	KEGG_INTESTINAL_IMMUNE_NETWORK_FOR_IGA_PRODUCTION		38	0.452853	1.85234	0	0.0206903	0.407	4103	tags=45%, list=21%, signal=56%
REACTOME_DOWNSTREAM_SIGNALING_OF_ACTIVATED_FGFR3	REACTOME_DOWNSTREAM_SIGNALING_OF_ACTIVATED_FGFR3		20	0.540295	1.84869	0.00320513	0.0208359	0.415	4795	tags=60%, list=24%, signal=79%
HALLMARK_IL6_JAK_STAT3_SIGNALING	HALLMARK_IL6_JAK_STAT3_SIGNALING		81	0.379608	1.83823	0	0.0225852	0.456	3893	tags=35%, list=20%, signal=43%
REACTOME_INTEGRIN_CELL_SURFACE_INTERACTIONS	REACTOME_INTEGRIN_CELL_SURFACE_INTERACTIONS		71	0.404969	1.83427	0.00537634	0.022512	0.459	5471	tags=51%, list=28%, signal=70%
REACTOME_DOWNSTREAM_SIGNALING_OF_ACTIVATED_FGFR1	REACTOME_DOWNSTREAM_SIGNALING_OF_ACTIVATED_FGFR1		20	0.535286	1.82329	0	0.0242441	0.483	3778	tags=50%, list=19%, signal=62%
REACTOME_CELL_SURFACE_INTERACTIONS_AT_THE_VASCULAR_WALL	REACTOME_CELL_SURFACE_INTERACTIONS_AT_THE_VASCULAR_WALL		171	0.340175	1.8143	0	0.0257483	0.515	5639	tags=51%, list=29%, signal=72%
REACTOME_SIGNALING_BY_FGFR1_IN_DISEASE	REACTOME_SIGNALING_BY_FGFR1_IN_DISEASE		31	0.473608	1.80725	0	0.0265355	0.53	3778	tags=48%, list=19%, signal=60%
REACTOME_DOWNSTREAM_SIGNALING_OF_ACTIVATED_FGFR4	REACTOME_DOWNSTREAM_SIGNALING_OF_ACTIVATED_FGFR4		19	0.534088	1.80379	0.010453	0.0270465	0.547	4430	tags=53%, list=23%, signal=68%
REACTOME_ECM_PROTEOGLYCANS	REACTOME_ECM_PROTEOGLYCANS		66	0.393132	1.80142	0	0.027009	0.553	5753	tags=53%, list=29%, signal=75%
KEGG_T_CELL_RECEPTOR_SIGNALING_PATHWAY	KEGG_T_CELL_RECEPTOR_SIGNALING_PATHWAY		99	0.354972	1.78656	0	0.0303597	0.609	3762	tags=38%, list=19%, signal=47%
KEGG_CELL_ADHESION_MOLECULES_CAMS	KEGG_CELL_ADHESION_MOLECULES_CAMS		106	0.361921	1.7652	0	0.0360443	0.669	5466	tags=49%, list=28%, signal=68%
REACTOME_NCAM1_INTERACTIONS	REACTOME_NCAM1_INTERACTIONS		32	0.466232	1.7639	0	0.0359452	0.674	5931	tags=63%, list=30%, signal=89%
REACTOME_SIGNALING_BY_ERBB2	REACTOME_SIGNALING_BY_ERBB2		49	0.412496	1.75971	0	0.0369445	0.69	4650	tags=41%, list=24%, signal=53%
REACTOME_SIGNALING_BY_PDGF	REACTOME_SIGNALING_BY_PDGF		53	0.413634	1.75967	0	0.0363719	0.69	4681	tags=55%, list=24%, signal=72%
REACTOME_SIGNALING_BY_BMP	REACTOME_SIGNALING_BY_BMP		21	0.500271	1.75617	0.0143369	0.0367565	0.697	3539	tags=43%, list=18%, signal=52%
REACTOME_NCAM_SIGNALING_FOR_NEURITE_OUT_GROWTH	REACTOME_NCAM_SIGNALING_FOR_NEURITE_OUT_GROWTH		53	0.409142	1.75381	0	0.0367631	0.704	5931	tags=57%, list=30%, signal=81%
REACTOME_REGULATION_OF_INSULIN_LIKE_GROWTH_FACTOR_IGF_TRANSPORT_AND_UPTAKE_BY_INSULIN_LIKE_GROWTH_FACTOR_BINDING_PROTEINS_IGFBPS	REACTOME_REGULATION_OF_INSULIN_LIKE_GROWTH_FACTOR_IGF_TRANSPORT_AND_UPTAKE_BY_INSULIN_LIKE_GROWTH_FACTOR_BINDING_PROTEINS_IGFBPS		93	0.356275	1.74978	0	0.0371898	0.713	2607	tags=26%, list=13%, signal=30%
REACTOME_PI3K_EVENTS_IN_ERBB2_SIGNALING	REACTOME_PI3K_EVENTS_IN_ERBB2_SIGNALING		16	0.539624	1.74387	0.0214724	0.0380137	0.724	5437	tags=63%, list=28%, signal=86%
REACTOME_PD_1_SIGNALING	REACTOME_PD_1_SIGNALING		23	0.484544	1.73485	0.00392157	0.0400704	0.745	3432	tags=48%, list=17%, signal=58%
KEGG_CHEMOKINE_SIGNALING_PATHWAY	KEGG_CHEMOKINE_SIGNALING_PATHWAY		161	0.330055	1.73371	0	0.0396975	0.747	3915	tags=33%, list=20%, signal=41%
REACTOME_NON_INTEGRIN_MEMBRANE_ECM_INTERACTIONS	REACTOME_NON_INTEGRIN_MEMBRANE_ECM_INTERACTIONS		52	0.398721	1.71998	0	0.0435479	0.791	3649	tags=37%, list=19%, signal=45%
REACTOME_SIGNALING_BY_ERBB2_IN_CANCER	REACTOME_SIGNALING_BY_ERBB2_IN_CANCER		25	0.478512	1.71759	0.00361011	0.0434911	0.797	5639	tags=56%, list=29%, signal=78%
REACTOME_TAK1_ACTIVATES_NFKB_BY_PHOSPHORYLATION_AND_ACTIVATION_OF_IKKS_COMPLEX	REACTOME_TAK1_ACTIVATES_NFKB_BY_PHOSPHORYLATION_AND_ACTIVATION_OF_IKKS_COMPLEX		31	0.449221	1.70746	0.00423729	0.0462098	0.814	2578	tags=39%, list=13%, signal=44%
REACTOME_FOXO_MEDIATED_TRANSCRIPTION_OF_CELL_CYCLE_GENES	REACTOME_FOXO_MEDIATED_TRANSCRIPTION_OF_CELL_CYCLE_GENES		16	0.537722	1.70397	0.0126183	0.0466382	0.827	2404	tags=50%, list=12%, signal=57%
REACTOME_COLLAGEN_DEGRADATION	REACTOME_COLLAGEN_DEGRADATION		48	0.400038	1.70338	0	0.0462993	0.831	5931	tags=52%, list=30%, signal=74%
REACTOME_SIGNALING_BY_TYPE_1_INSULIN_LIKE_GROWTH_FACTOR_1_RECEPTOR_IGF1R	REACTOME_SIGNALING_BY_TYPE_1_INSULIN_LIKE_GROWTH_FACTOR_1_RECEPTOR_IGF1R		42	0.406773	1.70192	0.00980392	0.0461784	0.835	4795	tags=52%, list=24%, signal=69%
REACTOME_SIGNALING_BY_CYTOSOLIC_FGFR1_FUSION_MUTANTS	REACTOME_SIGNALING_BY_CYTOSOLIC_FGFR1_FUSION_MUTANTS		17	0.510178	1.69216	0.0121212	0.0493095	0.859	2289	tags=47%, list=12%, signal=53%
KEGG_PROSTATE_CANCER	KEGG_PROSTATE_CANCER		83	0.355457	1.68602	0	0.0508185	0.866	3984	tags=46%, list=20%, signal=57%
REACTOME_CONSTITUTIVE_SIGNALING_BY_LIGAND_RESPONSIVE_EGFR_CANCER_VARIANTS	REACTOME_CONSTITUTIVE_SIGNALING_BY_LIGAND_RESPONSIVE_EGFR_CANCER_VARIANTS		19	0.500101	1.6826	0.029304	0.051405	0.876	3316	tags=37%, list=17%, signal=44%
HALLMARK_KRAS_SIGNALING_UP	HALLMARK_KRAS_SIGNALING_UP		173	0.322161	1.67267	0	0.0541274	0.89	4986	tags=40%, list=25%, signal=54%
REACTOME_NOTCH4_INTRACELLULAR_DOMAIN_REGULATES_TRANSCRIPTION	REACTOME_NOTCH4_INTRACELLULAR_DOMAIN_REGULATES_TRANSCRIPTION		20	0.485995	1.66969	0.0243056	0.0549356	0.898	3652	tags=50%, list=19%, signal=61%
REACTOME_ACTIVATED_TAK1_MEDIATES_P38_MAPK_ACTIVATION	REACTOME_ACTIVATED_TAK1_MEDIATES_P38_MAPK_ACTIVATION		23	0.481299	1.66684	0.0142349	0.0554374	0.906	2578	tags=48%, list=13%, signal=55%
REACTOME_CONSTITUTIVE_SIGNALING_BY_ABERRANT_PI3K_IN_CANCER	REACTOME_CONSTITUTIVE_SIGNALING_BY_ABERRANT_PI3K_IN_CANCER		63	0.361573	1.64598	0	0.0633394	0.938	5437	tags=54%, list=28%, signal=74%
REACTOME_SIGNALING_BY_ERYTHROPOIETIN	REACTOME_SIGNALING_BY_ERYTHROPOIETIN		24	0.446039	1.63806	0.011811	0.0657824	0.946	3762	tags=54%, list=19%, signal=67%
REACTOME_FRS_MEDIATED_FGFR2_SIGNALING	REACTOME_FRS_MEDIATED_FGFR2_SIGNALING		16	0.517239	1.63078	0.0371622	0.0685653	0.953	4795	tags=56%, list=24%, signal=74%
HALLMARK_HYPOXIA	HALLMARK_HYPOXIA		178	0.303277	1.62936	0	0.0683595	0.953	3791	tags=34%, list=19%, signal=42%
REACTOME_NUCLEAR_RECEPTOR_TRANSCRIPTION_PATHWAY	REACTOME_NUCLEAR_RECEPTOR_TRANSCRIPTION_PATHWAY		44	0.390025	1.62872	0.00952381	0.0677877	0.954	2821	tags=30%, list=14%, signal=34%
REACTOME_MET_PROMOTES_CELL_MOTILITY	REACTOME_MET_PROMOTES_CELL_MOTILITY		38	0.410228	1.62762	0.00909091	0.0676322	0.956	4650	tags=47%, list=24%, signal=62%
REACTOME_FRS_MEDIATED_FGFR3_SIGNALING	REACTOME_FRS_MEDIATED_FGFR3_SIGNALING		15	0.519053	1.62608	0.022508	0.0675974	0.956	4795	tags=60%, list=24%, signal=79%
REACTOME_G_BETA_GAMMA_SIGNALLING_THROUGH_PI3KGAMMA	REACTOME_G_BETA_GAMMA_SIGNALLING_THROUGH_PI3KGAMMA		21	0.471439	1.62139	0.0223048	0.0690685	0.965	4642	tags=57%, list=24%, signal=75%
REACTOME_ELASTIC_FIBRE_FORMATION	REACTOME_ELASTIC_FIBRE_FORMATION		37	0.412011	1.61947	0.00454545	0.0691211	0.965	4159	tags=41%, list=21%, signal=51%
REACTOME_GENERATION_OF_SECOND_MESSENGER_MOLECULES	REACTOME_GENERATION_OF_SECOND_MESSENGER_MOLECULES		33	0.417518	1.61939	0.0151515	0.0684072	0.965	3432	tags=36%, list=17%, signal=44%
REACTOME_SIGNALING_BY_INTERLEUKINS	REACTOME_SIGNALING_BY_INTERLEUKINS		397	0.275049	1.61895	0	0.0678562	0.966	3143	tags=27%, list=16%, signal=31%
REACTOME_SIGNALING_BY_FGFR1	REACTOME_SIGNALING_BY_FGFR1		39	0.401248	1.6169	0.00892857	0.0681569	0.969	4795	tags=46%, list=24%, signal=61%
REACTOME_INTERLEUKIN_6_FAMILY_SIGNALING	REACTOME_INTERLEUKIN_6_FAMILY_SIGNALING		20	0.473612	1.61403	0.0168919	0.0688463	0.97	2437	tags=40%, list=12%, signal=46%
REACTOME_SIGNALING_BY_FGFR3	REACTOME_SIGNALING_BY_FGFR3		35	0.399147	1.60573	0.0163934	0.071985	0.975	4795	tags=49%, list=24%, signal=64%
REACTOME_NGF_STIMULATED_TRANSCRIPTION	REACTOME_NGF_STIMULATED_TRANSCRIPTION		34	0.402596	1.60219	0.0121457	0.0727756	0.979	4002	tags=50%, list=20%, signal=63%
REACTOME_CONSTITUTIVE_SIGNALING_BY_EGFRVIII	REACTOME_CONSTITUTIVE_SIGNALING_BY_EGFRVIII		15	0.510848	1.59769	0.0293255	0.0742753	0.98	3316	tags=40%, list=17%, signal=48%
KEGG_MAPK_SIGNALING_PATHWAY	KEGG_MAPK_SIGNALING_PATHWAY		223	0.292497	1.59591	0	0.0743339	0.98	4587	tags=35%, list=23%, signal=45%
KEGG_NEUROTROPHIN_SIGNALING_PATHWAY	KEGG_NEUROTROPHIN_SIGNALING_PATHWAY		118	0.315268	1.59434	0	0.0742945	0.98	4818	tags=46%, list=24%, signal=60%
REACTOME_INACTIVATION_OF_CSF3_G_CSF_SIGNALING	REACTOME_INACTIVATION_OF_CSF3_G_CSF_SIGNALING		23	0.454015	1.59413	0.019305	0.0735549	0.98	2363	tags=35%, list=12%, signal=39%
HALLMARK_ALLOGRAFT_REJECTION	HALLMARK_ALLOGRAFT_REJECTION		176	0.287139	1.58594	0	0.0769703	0.984	4175	tags=34%, list=21%, signal=42%
REACTOME_SIGNALING_BY_ERBB2_ECD_MUTANTS	REACTOME_SIGNALING_BY_ERBB2_ECD_MUTANTS		15	0.511288	1.58282	0.0434783	0.077739	0.984	3316	tags=40%, list=17%, signal=48%
REACTOME_P75NTR_SIGNALS_VIA_NF_KB	REACTOME_P75NTR_SIGNALS_VIA_NF_KB		15	0.495244	1.56672	0.0457317	0.0851883	0.988	3095	tags=53%, list=16%, signal=63%
REACTOME_SIGNALING_BY_FGFR4	REACTOME_SIGNALING_BY_FGFR4		33	0.407016	1.56074	0.0329218	0.0879212	0.991	4650	tags=45%, list=24%, signal=59%
REACTOME_DOWNSTREAM_SIGNAL_TRANSDUCTION	REACTOME_DOWNSTREAM_SIGNAL_TRANSDUCTION		28	0.409916	1.56039	0.0275862	0.0872127	0.991	3490	tags=54%, list=18%, signal=65%
KEGG_ALDOSTERONE_REGULATED_SODIUM_REABSORPTION	KEGG_ALDOSTERONE_REGULATED_SODIUM_REABSORPTION		38	0.383975	1.55643	0.0203252	0.0887718	0.991	3762	tags=39%, list=19%, signal=49%
REACTOME_IRS_MEDIATED_SIGNALLING	REACTOME_IRS_MEDIATED_SIGNALLING		36	0.383402	1.54872	0.00434783	0.0926285	0.991	4795	tags=50%, list=24%, signal=66%
REACTOME_PI3K_AKT_SIGNALING_IN_CANCER	REACTOME_PI3K_AKT_SIGNALING_IN_CANCER		90	0.325887	1.54496	0.00729927	0.0938362	0.991	4795	tags=43%, list=24%, signal=57%
KEGG_LEISHMANIA_INFECTION	KEGG_LEISHMANIA_INFECTION		66	0.33811	1.54133	0.0129032	0.0950095	0.991	4240	tags=39%, list=22%, signal=50%
REACTOME_CLASS_A_1_RHODOPSIN_LIKE_RECEPTORS	REACTOME_CLASS_A_1_RHODOPSIN_LIKE_RECEPTORS		166	0.290249	1.53906	0	0.09552	0.991	5274	tags=39%, list=27%, signal=52%
REACTOME_OVARIAN_TUMOR_DOMAIN_PROTEASES	REACTOME_OVARIAN_TUMOR_DOMAIN_PROTEASES		37	0.379862	1.53797	0.0172414	0.0953355	0.991	2278	tags=32%, list=12%, signal=37%
HALLMARK_IL2_STAT5_SIGNALING	HALLMARK_IL2_STAT5_SIGNALING		184	0.281394	1.53439	0	0.096712	0.991	2618	tags=22%, list=13%, signal=25%
KEGG_COMPLEMENT_AND_COAGULATION_CASCADES	KEGG_COMPLEMENT_AND_COAGULATION_CASCADES		47	0.355772	1.53273	0.00436681	0.0971285	0.992	4149	tags=36%, list=21%, signal=46%
KEGG_ACUTE_MYELOID_LEUKEMIA	KEGG_ACUTE_MYELOID_LEUKEMIA		57	0.352491	1.53232	0	0.0964815	0.992	4175	tags=44%, list=21%, signal=56%
REACTOME_HDMS_DEMETHYLATE_HISTONES	REACTOME_HDMS_DEMETHYLATE_HISTONES		21	0.453388	1.52805	0.0347222	0.0983591	0.992	2474	tags=38%, list=13%, signal=44%
REACTOME_GLUCAGON_TYPE_LIGAND_RECEPTORS	REACTOME_GLUCAGON_TYPE_LIGAND_RECEPTORS		19	0.464314	1.52706	0.0419355	0.0979665	0.993	5309	tags=58%, list=27%, signal=79%
KEGG_NATURAL_KILLER_CELL_MEDIATED_CYTOTOXICITY	KEGG_NATURAL_KILLER_CELL_MEDIATED_CYTOTOXICITY		104	0.30506	1.5266	0	0.0973936	0.993	3561	tags=35%, list=18%, signal=42%
REACTOME_TRAF6_MEDIATED_INDUCTION_OF_TAK1_COMPLEX_WITHIN_TLR4_COMPLEX	REACTOME_TRAF6_MEDIATED_INDUCTION_OF_TAK1_COMPLEX_WITHIN_TLR4_COMPLEX		16	0.480274	1.52521	0.0454545	0.0975944	0.993	2578	tags=38%, list=13%, signal=43%
REACTOME_FGFR1_MUTANT_RECEPTOR_ACTIVATION	REACTOME_FGFR1_MUTANT_RECEPTOR_ACTIVATION		24	0.429373	1.52313	0.0352113	0.0979388	0.993	3778	tags=46%, list=19%, signal=57%
REACTOME_INTERLEUKIN_7_SIGNALING	REACTOME_INTERLEUKIN_7_SIGNALING		21	0.42516	1.51751	0.0442177	0.10065	0.993	3670	tags=43%, list=19%, signal=53%
REACTOME_PARASITE_INFECTION	REACTOME_PARASITE_INFECTION		115	0.294222	1.51561	0	0.100808	0.995	4905	tags=43%, list=25%, signal=58%
REACTOME_TRANSCRIPTIONAL_REGULATION_OF_PLURIPOTENT_STEM_CELLS	REACTOME_TRANSCRIPTIONAL_REGULATION_OF_PLURIPOTENT_STEM_CELLS		20	0.444151	1.51356	0.0350318	0.101332	0.995	3321	tags=35%, list=17%, signal=42%
REACTOME_REGULATION_OF_GENE_EXPRESSION_IN_LATE_STAGE_BRANCHING_MORPHOGENESIS_PANCREATIC_BUD_PRECURSOR_CELLS	REACTOME_REGULATION_OF_GENE_EXPRESSION_IN_LATE_STAGE_BRANCHING_MORPHOGENESIS_PANCREATIC_BUD_PRECURSOR_CELLS		15	0.480704	1.50733	0.0542169	0.104319	0.995	3652	tags=47%, list=19%, signal=57%
REACTOME_EXTRACELLULAR_MATRIX_ORGANIZATION	REACTOME_EXTRACELLULAR_MATRIX_ORGANIZATION		239	0.262156	1.50257	0	0.106884	0.997	5551	tags=39%, list=28%, signal=54%
REACTOME_COSTIMULATION_BY_THE_CD28_FAMILY	REACTOME_COSTIMULATION_BY_THE_CD28_FAMILY		68	0.319854	1.5024	0.00581395	0.106119	0.997	3561	tags=35%, list=18%, signal=43%
REACTOME_NETRIN_1_SIGNALING	REACTOME_NETRIN_1_SIGNALING		42	0.368445	1.5011	0.0315315	0.106151	0.997	3709	tags=33%, list=19%, signal=41%
REACTOME_NEGATIVE_REGULATION_OF_FGFR2_SIGNALING	REACTOME_NEGATIVE_REGULATION_OF_FGFR2_SIGNALING		25	0.41388	1.49814	0.037594	0.10739	0.998	4795	tags=48%, list=24%, signal=63%
REACTOME_JNK_C_JUN_KINASES_PHOSPHORYLATION_AND_ACTIVATION_MEDIATED_BY_ACTIVATED_HUMAN_TAK1	REACTOME_JNK_C_JUN_KINASES_PHOSPHORYLATION_AND_ACTIVATION_MEDIATED_BY_ACTIVATED_HUMAN_TAK1		22	0.428635	1.49472	0.0613718	0.108826	0.998	2578	tags=41%, list=13%, signal=47%
REACTOME_THROMBIN_SIGNALLING_THROUGH_PROTEINASE_ACTIVATED_RECEPTORS_PARS	REACTOME_THROMBIN_SIGNALLING_THROUGH_PROTEINASE_ACTIVATED_RECEPTORS_PARS		25	0.407943	1.49305	0.0373134	0.109119	0.998	4650	tags=52%, list=24%, signal=68%
KEGG_B_CELL_RECEPTOR_SIGNALING_PATHWAY	KEGG_B_CELL_RECEPTOR_SIGNALING_PATHWAY		72	0.318429	1.49053	0	0.110028	0.998	3915	tags=39%, list=20%, signal=48%
REACTOME_NEGATIVE_REGULATION_OF_FGFR3_SIGNALING	REACTOME_NEGATIVE_REGULATION_OF_FGFR3_SIGNALING		24	0.415335	1.488	0.0433333	0.11109	0.999	4795	tags=50%, list=24%, signal=66%
KEGG_ECM_RECEPTOR_INTERACTION	KEGG_ECM_RECEPTOR_INTERACTION		74	0.318057	1.48369	0.00704225	0.112985	1	4565	tags=36%, list=23%, signal=47%
KEGG_FOCAL_ADHESION	KEGG_FOCAL_ADHESION		182	0.270591	1.48196	0	0.113173	1	4730	tags=36%, list=24%, signal=47%
REACTOME_OTHER_SEMAPHORIN_INTERACTIONS	REACTOME_OTHER_SEMAPHORIN_INTERACTIONS		17	0.454785	1.48181	0.0430464	0.112415	1	6640	tags=71%, list=34%, signal=106%
REACTOME_G_BETA_GAMMA_SIGNALLING_THROUGH_CDC42	REACTOME_G_BETA_GAMMA_SIGNALLING_THROUGH_CDC42		16	0.473421	1.47933	0.0505051	0.113236	1	5309	tags=63%, list=27%, signal=86%
REACTOME_REGULATION_OF_SIGNALING_BY_CBL	REACTOME_REGULATION_OF_SIGNALING_BY_CBL		22	0.431865	1.46515	0.0671642	0.123399	1	1578	tags=32%, list=8%, signal=35%
REACTOME_FOXO_MEDIATED_TRANSCRIPTION	REACTOME_FOXO_MEDIATED_TRANSCRIPTION		57	0.327268	1.46253	0.00561798	0.124488	1	3368	tags=39%, list=17%, signal=46%
REACTOME_GABA_B_RECEPTOR_ACTIVATION	REACTOME_GABA_B_RECEPTOR_ACTIVATION		33	0.370528	1.46006	0.0389105	0.125497	1	5446	tags=48%, list=28%, signal=67%
REACTOME_MET_ACTIVATES_PTK2_SIGNALING	REACTOME_MET_ACTIVATES_PTK2_SIGNALING		28	0.393348	1.45926	0.0524194	0.125178	1	4650	tags=46%, list=24%, signal=61%
REACTOME_SYNDECAN_INTERACTIONS	REACTOME_SYNDECAN_INTERACTIONS		26	0.384472	1.43993	0.0493827	0.140133	1	3370	tags=31%, list=17%, signal=37%
REACTOME_RIP_MEDIATED_NFKB_ACTIVATION_VIA_ZBP1	REACTOME_RIP_MEDIATED_NFKB_ACTIVATION_VIA_ZBP1		17	0.428885	1.43482	0.0622837	0.143385	1	1070	tags=35%, list=5%, signal=37%
REACTOME_SIGNALLING_TO_ERKS	REACTOME_SIGNALLING_TO_ERKS		32	0.365643	1.43447	0.0547945	0.142726	1	3709	tags=44%, list=19%, signal=54%
REACTOME_MOLECULES_ASSOCIATED_WITH_ELASTIC_FIBRES	REACTOME_MOLECULES_ASSOCIATED_WITH_ELASTIC_FIBRES		31	0.376273	1.43128	0.0478088	0.144785	1	4013	tags=35%, list=20%, signal=45%
REACTOME_ACTIVATION_OF_BH3_ONLY_PROTEINS	REACTOME_ACTIVATION_OF_BH3_ONLY_PROTEINS		29	0.374482	1.42726	0.0674603	0.147326	1	688	tags=24%, list=3%, signal=25%
REACTOME_SIGNALING_BY_KIT_IN_DISEASE	REACTOME_SIGNALING_BY_KIT_IN_DISEASE		20	0.41909	1.42485	0.0716846	0.148348	1	4947	tags=65%, list=25%, signal=87%
REACTOME_PRESYNAPTIC_FUNCTION_OF_KAINATE_RECEPTORS	REACTOME_PRESYNAPTIC_FUNCTION_OF_KAINATE_RECEPTORS		16	0.454477	1.42298	0.0759076	0.148862	1	5309	tags=63%, list=27%, signal=86%
REACTOME_PLASMA_LIPOPROTEIN_REMODELING	REACTOME_PLASMA_LIPOPROTEIN_REMODELING		19	0.433798	1.42075	0.0487805	0.149858	1	5913	tags=63%, list=30%, signal=90%
REACTOME_G_PROTEIN_ACTIVATION	REACTOME_G_PROTEIN_ACTIVATION		17	0.457772	1.4197	0.0824373	0.149888	1	4642	tags=59%, list=24%, signal=77%
KEGG_ADHERENS_JUNCTION	KEGG_ADHERENS_JUNCTION		66	0.312937	1.4181	0.0192308	0.150511	1	4650	tags=42%, list=24%, signal=55%
REACTOME_SIGNALING_BY_EGFR_IN_CANCER	REACTOME_SIGNALING_BY_EGFR_IN_CANCER		24	0.39771	1.4159	0.0557491	0.151441	1	2371	tags=29%, list=12%, signal=33%
REACTOME_FOXO_MEDIATED_TRANSCRIPTION_OF_CELL_DEATH_GENES	REACTOME_FOXO_MEDIATED_TRANSCRIPTION_OF_CELL_DEATH_GENES		15	0.454086	1.41058	0.0566667	0.155384	1	3368	tags=60%, list=17%, signal=72%
KEGG_ANTIGEN_PROCESSING_AND_PRESENTATION	KEGG_ANTIGEN_PROCESSING_AND_PRESENTATION		61	0.31611	1.41037	0.0227273	0.154536	1	4295	tags=43%, list=22%, signal=54%
REACTOME_POTASSIUM_CHANNELS	REACTOME_POTASSIUM_CHANNELS		68	0.311959	1.40973	0.0295858	0.154177	1	5446	tags=41%, list=28%, signal=57%
REACTOME_TRANSCRIPTIONAL_ACTIVITY_OF_SMAD2_SMAD3_SMAD4_HETEROTRIMER	REACTOME_TRANSCRIPTIONAL_ACTIVITY_OF_SMAD2_SMAD3_SMAD4_HETEROTRIMER		44	0.335678	1.40832	0.0245098	0.154363	1	2880	tags=30%, list=15%, signal=35%
KEGG_VIRAL_MYOCARDITIS	KEGG_VIRAL_MYOCARDITIS		58	0.321496	1.40785	0.0220994	0.153825	1	4103	tags=41%, list=21%, signal=52%
REACTOME_CONSTITUTIVE_SIGNALING_BY_AKT1_E17K_IN_CANCER	REACTOME_CONSTITUTIVE_SIGNALING_BY_AKT1_E17K_IN_CANCER		26	0.392353	1.40726	0.0599251	0.153411	1	2378	tags=35%, list=12%, signal=39%
REACTOME_THROMBOXANE_SIGNALLING_THROUGH_TP_RECEPTOR	REACTOME_THROMBOXANE_SIGNALLING_THROUGH_TP_RECEPTOR		18	0.420496	1.40443	0.0783699	0.154885	1	4642	tags=61%, list=24%, signal=80%
REACTOME_REGULATION_OF_BETA_CELL_DEVELOPMENT	REACTOME_REGULATION_OF_BETA_CELL_DEVELOPMENT		25	0.399815	1.40387	0.0756972	0.154374	1	3652	tags=36%, list=19%, signal=44%
REACTOME_SIGNALING_BY_ERBB4	REACTOME_SIGNALING_BY_ERBB4		53	0.321995	1.40378	0.0184332	0.153462	1	3316	tags=28%, list=17%, signal=34%
REACTOME_INTERLEUKIN_3_INTERLEUKIN_5_AND_GM_CSF_SIGNALING	REACTOME_INTERLEUKIN_3_INTERLEUKIN_5_AND_GM_CSF_SIGNALING		43	0.342464	1.40361	0.0552995	0.152646	1	1834	tags=26%, list=9%, signal=28%
REACTOME_RET_SIGNALING	REACTOME_RET_SIGNALING		36	0.361489	1.40302	0.0619469	0.152346	1	1366	tags=19%, list=7%, signal=21%
REACTOME_GPCR_LIGAND_BINDING	REACTOME_GPCR_LIGAND_BINDING		228	0.258341	1.40068	0	0.153495	1	5309	tags=37%, list=27%, signal=50%
REACTOME_GRB2_EVENTS_IN_ERBB2_SIGNALING	REACTOME_GRB2_EVENTS_IN_ERBB2_SIGNALING		16	0.433988	1.40068	0.0877743	0.152554	1	5639	tags=56%, list=29%, signal=79%
REACTOME_STRIATED_MUSCLE_CONTRACTION	REACTOME_STRIATED_MUSCLE_CONTRACTION		24	0.389652	1.40041	0.0577617	0.151881	1	3380	tags=25%, list=17%, signal=30%
REACTOME_RUNX1_INTERACTS_WITH_CO_FACTORS_WHOSE_PRECISE_EFFECT_ON_RUNX1_TARGETS_IS_NOT_KNOWN	REACTOME_RUNX1_INTERACTS_WITH_CO_FACTORS_WHOSE_PRECISE_EFFECT_ON_RUNX1_TARGETS_IS_NOT_KNOWN		36	0.357535	1.39997	0.0578512	0.151389	1	2180	tags=31%, list=11%, signal=34%
REACTOME_SCAVENGING_BY_CLASS_A_RECEPTORS	REACTOME_SCAVENGING_BY_CLASS_A_RECEPTORS		17	0.434383	1.39964	0.0930233	0.150722	1	5913	tags=59%, list=30%, signal=84%
REACTOME_LEISHMANIA_INFECTION	REACTOME_LEISHMANIA_INFECTION		245	0.251996	1.39665	0	0.152447	1	4905	tags=37%, list=25%, signal=48%
REACTOME_THE_NLRP3_INFLAMMASOME	REACTOME_THE_NLRP3_INFLAMMASOME		16	0.424744	1.39541	0.0809969	0.15274	1	4338	tags=50%, list=22%, signal=64%
REACTOME_NUCLEAR_SIGNALING_BY_ERBB4	REACTOME_NUCLEAR_SIGNALING_BY_ERBB4		31	0.352254	1.38189	0.0763359	0.163779	1	5437	tags=48%, list=28%, signal=67%
REACTOME_SIGNALING_BY_NTRKS	REACTOME_SIGNALING_BY_NTRKS		124	0.269255	1.38	0.0103093	0.164812	1	3780	tags=37%, list=19%, signal=46%
REACTOME_INSULIN_RECEPTOR_SIGNALLING_CASCADE	REACTOME_INSULIN_RECEPTOR_SIGNALLING_CASCADE		41	0.338996	1.37944	0.0619048	0.164295	1	4795	tags=46%, list=24%, signal=61%
REACTOME_ADP_SIGNALLING_THROUGH_P2Y_PURINOCEPTOR_12	REACTOME_ADP_SIGNALLING_THROUGH_P2Y_PURINOCEPTOR_12		16	0.441308	1.3716	0.0940439	0.170726	1	5895	tags=63%, list=30%, signal=89%
KEGG_BLADDER_CANCER	KEGG_BLADDER_CANCER		40	0.336505	1.36755	0.0647773	0.17357	1	5069	tags=45%, list=26%, signal=61%
KEGG_P53_SIGNALING_PATHWAY	KEGG_P53_SIGNALING_PATHWAY		65	0.292385	1.36703	0.03125	0.17312	1	767	tags=18%, list=4%, signal=19%
REACTOME_NOTCH3_INTRACELLULAR_DOMAIN_REGULATES_TRANSCRIPTION	REACTOME_NOTCH3_INTRACELLULAR_DOMAIN_REGULATES_TRANSCRIPTION		24	0.390495	1.36552	0.0954064	0.173655	1	1963	tags=33%, list=10%, signal=37%
REACTOME_NEGATIVE_REGULATION_OF_FGFR4_SIGNALING	REACTOME_NEGATIVE_REGULATION_OF_FGFR4_SIGNALING		23	0.392027	1.36295	0.0846154	0.175251	1	4650	tags=43%, list=24%, signal=57%
REACTOME_TNF_RECEPTOR_SUPERFAMILY_TNFSF_MEMBERS_MEDIATING_NON_CANONICAL_NF_KB_PATHWAY	REACTOME_TNF_RECEPTOR_SUPERFAMILY_TNFSF_MEMBERS_MEDIATING_NON_CANONICAL_NF_KB_PATHWAY		15	0.434757	1.36229	0.105105	0.174937	1	4730	tags=40%, list=24%, signal=53%
HALLMARK_ANGIOGENESIS	HALLMARK_ANGIOGENESIS		34	0.351449	1.35629	0.0948276	0.179985	1	4896	tags=41%, list=25%, signal=55%
KEGG_MELANOMA	KEGG_MELANOMA		59	0.303076	1.35381	0.0164835	0.181546	1	4504	tags=44%, list=23%, signal=57%
HALLMARK_APICAL_SURFACE	HALLMARK_APICAL_SURFACE		35	0.337703	1.34337	0.0634146	0.191388	1	5475	tags=46%, list=28%, signal=63%
KEGG_DORSO_VENTRAL_AXIS_FORMATION	KEGG_DORSO_VENTRAL_AXIS_FORMATION		21	0.387923	1.34152	0.0909091	0.192365	1	5639	tags=57%, list=29%, signal=80%
REACTOME_TOLL_LIKE_RECEPTOR_9_TLR9_CASCADE	REACTOME_TOLL_LIKE_RECEPTOR_9_TLR9_CASCADE		93	0.270384	1.34148	0.0220588	0.191349	1	1818	tags=23%, list=9%, signal=25%
REACTOME_G_PROTEIN_BETA_GAMMA_SIGNALLING	REACTOME_G_PROTEIN_BETA_GAMMA_SIGNALLING		28	0.352671	1.33909	0.0881226	0.193206	1	4642	tags=50%, list=24%, signal=65%
REACTOME_NEGATIVE_REGULATION_OF_FGFR1_SIGNALING	REACTOME_NEGATIVE_REGULATION_OF_FGFR1_SIGNALING		23	0.381703	1.33811	0.110294	0.193322	1	4795	tags=43%, list=24%, signal=57%
REACTOME_OTHER_INTERLEUKIN_SIGNALING	REACTOME_OTHER_INTERLEUKIN_SIGNALING		23	0.373121	1.33466	0.0928571	0.196016	1	1834	tags=26%, list=9%, signal=29%
REACTOME_PEPTIDE_LIGAND_BINDING_RECEPTORS	REACTOME_PEPTIDE_LIGAND_BINDING_RECEPTORS		101	0.277657	1.33441	0.00769231	0.195235	1	5385	tags=38%, list=27%, signal=52%
REACTOME_TRANSCRIPTIONAL_REGULATION_BY_MECP2	REACTOME_TRANSCRIPTIONAL_REGULATION_BY_MECP2		55	0.299186	1.33312	0.0425532	0.195621	1	3143	tags=31%, list=16%, signal=37%
KEGG_SYSTEMIC_LUPUS_ERYTHEMATOSUS	KEGG_SYSTEMIC_LUPUS_ERYTHEMATOSUS		48	0.313216	1.33229	0.0514019	0.195458	1	3432	tags=29%, list=17%, signal=35%
REACTOME_HEME_SIGNALING	REACTOME_HEME_SIGNALING		48	0.311625	1.33189	0.0700935	0.194805	1	3606	tags=31%, list=18%, signal=38%
REACTOME_SEMA4D_INDUCED_CELL_MIGRATION_AND_GROWTH_CONE_COLLAPSE	REACTOME_SEMA4D_INDUCED_CELL_MIGRATION_AND_GROWTH_CONE_COLLAPSE		20	0.391771	1.3318	0.10473	0.193829	1	4347	tags=30%, list=22%, signal=38%
REACTOME_O_GLYCOSYLATION_OF_TSR_DOMAIN_CONTAINING_PROTEINS	REACTOME_O_GLYCOSYLATION_OF_TSR_DOMAIN_CONTAINING_PROTEINS		26	0.352398	1.33088	0.0735294	0.193793	1	4902	tags=42%, list=25%, signal=56%
KEGG_DILATED_CARDIOMYOPATHY	KEGG_DILATED_CARDIOMYOPATHY		70	0.284666	1.32949	0.0529412	0.194315	1	4545	tags=29%, list=23%, signal=37%
REACTOME_RHO_GTPASES_ACTIVATE_CIT	REACTOME_RHO_GTPASES_ACTIVATE_CIT		19	0.398424	1.32204	0.126437	0.201295	1	4347	tags=32%, list=22%, signal=40%
REACTOME_COLLAGEN_BIOSYNTHESIS_AND_MODIFYING_ENZYMES	REACTOME_COLLAGEN_BIOSYNTHESIS_AND_MODIFYING_ENZYMES		55	0.297284	1.31756	0.05	0.205734	1	4788	tags=42%, list=24%, signal=55%
REACTOME_MYD88_INDEPENDENT_TLR4_CASCADE	REACTOME_MYD88_INDEPENDENT_TLR4_CASCADE		96	0.264743	1.31509	0.0592593	0.207612	1	2578	tags=26%, list=13%, signal=30%
REACTOME_CA2_PATHWAY	REACTOME_CA2_PATHWAY		55	0.298521	1.30893	0.0621469	0.213703	1	4642	tags=40%, list=24%, signal=52%
REACTOME_DEGRADATION_OF_THE_EXTRACELLULAR_MATRIX	REACTOME_DEGRADATION_OF_THE_EXTRACELLULAR_MATRIX		105	0.261566	1.30774	0.057971	0.214076	1	5457	tags=36%, list=28%, signal=50%
HALLMARK_KRAS_SIGNALING_DN	HALLMARK_KRAS_SIGNALING_DN		117	0.259246	1.30495	0.0105263	0.216319	1	5578	tags=38%, list=28%, signal=53%
REACTOME_REGULATION_OF_RUNX1_EXPRESSION_AND_ACTIVITY	REACTOME_REGULATION_OF_RUNX1_EXPRESSION_AND_ACTIVITY		17	0.399474	1.30448	0.146497	0.215808	1	4650	tags=35%, list=24%, signal=46%
REACTOME_INTERLEUKIN_2_FAMILY_SIGNALING	REACTOME_INTERLEUKIN_2_FAMILY_SIGNALING		36	0.33457	1.30187	0.106383	0.217727	1	3316	tags=36%, list=17%, signal=43%
REACTOME_REGULATION_OF_TNFR1_SIGNALING	REACTOME_REGULATION_OF_TNFR1_SIGNALING		34	0.329551	1.2952	0.121569	0.224764	1	1578	tags=24%, list=8%, signal=26%
REACTOME_ERBB2_REGULATES_CELL_MOTILITY	REACTOME_ERBB2_REGULATES_CELL_MOTILITY		15	0.416283	1.29347	0.137195	0.225781	1	5437	tags=47%, list=28%, signal=64%
REACTOME_DAP12_INTERACTIONS	REACTOME_DAP12_INTERACTIONS		36	0.32358	1.2929	0.0851064	0.225347	1	4456	tags=44%, list=23%, signal=57%
REACTOME_FCGAMMA_RECEPTOR_FCGR_DEPENDENT_PHAGOCYTOSIS	REACTOME_FCGAMMA_RECEPTOR_FCGR_DEPENDENT_PHAGOCYTOSIS		141	0.250777	1.29207	0.00980392	0.225203	1	4905	tags=38%, list=25%, signal=50%
REACTOME_TP53_REGULATES_TRANSCRIPTION_OF_GENES_INVOLVED_IN_CYTOCHROME_C_RELEASE	REACTOME_TP53_REGULATES_TRANSCRIPTION_OF_GENES_INVOLVED_IN_CYTOCHROME_C_RELEASE		18	0.392868	1.29063	0.128814	0.226027	1	1949	tags=39%, list=10%, signal=43%
REACTOME_NEGATIVE_REGULATION_OF_THE_PI3K_AKT_NETWORK	REACTOME_NEGATIVE_REGULATION_OF_THE_PI3K_AKT_NETWORK		97	0.262287	1.29043	0.0291971	0.225142	1	4650	tags=38%, list=24%, signal=50%
REACTOME_SHC1_EVENTS_IN_ERBB2_SIGNALING	REACTOME_SHC1_EVENTS_IN_ERBB2_SIGNALING		22	0.365277	1.2894	0.106164	0.225356	1	5639	tags=50%, list=29%, signal=70%
REACTOME_NEGATIVE_REGULATION_OF_MET_ACTIVITY	REACTOME_NEGATIVE_REGULATION_OF_MET_ACTIVITY		21	0.370554	1.28931	0.166667	0.224408	1	1745	tags=29%, list=9%, signal=31%
REACTOME_G_ALPHA_S_SIGNALLING_EVENTS	REACTOME_G_ALPHA_S_SIGNALLING_EVENTS		82	0.275145	1.28367	0.0642857	0.230314	1	4888	tags=34%, list=25%, signal=45%
REACTOME_LISTERIA_MONOCYTOGENES_ENTRY_INTO_HOST_CELLS	REACTOME_LISTERIA_MONOCYTOGENES_ENTRY_INTO_HOST_CELLS		20	0.366725	1.27842	0.149606	0.235514	1	4650	tags=50%, list=24%, signal=65%
REACTOME_RORA_ACTIVATES_GENE_EXPRESSION	REACTOME_RORA_ACTIVATES_GENE_EXPRESSION		18	0.384818	1.27696	0.14511	0.236332	1	3082	tags=28%, list=16%, signal=33%
KEGG_TOLL_LIKE_RECEPTOR_SIGNALING_PATHWAY	KEGG_TOLL_LIKE_RECEPTOR_SIGNALING_PATHWAY		86	0.266234	1.27367	0.0489511	0.239489	1	2069	tags=23%, list=11%, signal=26%
REACTOME_ZBP1_DAI_MEDIATED_INDUCTION_OF_TYPE_I_IFNS	REACTOME_ZBP1_DAI_MEDIATED_INDUCTION_OF_TYPE_I_IFNS		20	0.377768	1.27284	0.161716	0.239482	1	1070	tags=30%, list=5%, signal=32%
REACTOME_SIGNALING_BY_TGFB_FAMILY_MEMBERS	REACTOME_SIGNALING_BY_TGFB_FAMILY_MEMBERS		94	0.269139	1.27171	0.057554	0.23983	1	4575	tags=36%, list=23%, signal=47%
REACTOME_SEMA3A_PAK_DEPENDENT_AXON_REPULSION	REACTOME_SEMA3A_PAK_DEPENDENT_AXON_REPULSION		16	0.398059	1.26558	0.16358	0.246855	1	4713	tags=50%, list=24%, signal=66%
KEGG_GLYCOSPHINGOLIPID_BIOSYNTHESIS_LACTO_AND_NEOLACTO_SERIES	KEGG_GLYCOSPHINGOLIPID_BIOSYNTHESIS_LACTO_AND_NEOLACTO_SERIES		21	0.366229	1.26192	0.172794	0.250718	1	1910	tags=24%, list=10%, signal=26%
REACTOME_COLLAGEN_FORMATION	REACTOME_COLLAGEN_FORMATION		73	0.271817	1.25641	0.0860927	0.25734	1	6059	tags=47%, list=31%, signal=67%
KEGG_ERBB_SIGNALING_PATHWAY	KEGG_ERBB_SIGNALING_PATHWAY		85	0.266537	1.25528	0.0774648	0.257682	1	4002	tags=34%, list=20%, signal=43%
REACTOME_SEMAPHORIN_INTERACTIONS	REACTOME_SEMAPHORIN_INTERACTIONS		61	0.27696	1.25485	0.114286	0.25704	1	5176	tags=38%, list=26%, signal=51%
REACTOME_MECP2_REGULATES_NEURONAL_RECEPTORS_AND_CHANNELS	REACTOME_MECP2_REGULATES_NEURONAL_RECEPTORS_AND_CHANNELS		17	0.396226	1.25352	0.156146	0.257886	1	3143	tags=41%, list=16%, signal=49%
KEGG_CHRONIC_MYELOID_LEUKEMIA	KEGG_CHRONIC_MYELOID_LEUKEMIA		72	0.265874	1.253	0.0823529	0.257518	1	3396	tags=32%, list=17%, signal=38%
REACTOME_DOWNREGULATION_OF_SMAD2_3_SMAD4_TRANSCRIPTIONAL_ACTIVITY	REACTOME_DOWNREGULATION_OF_SMAD2_3_SMAD4_TRANSCRIPTIONAL_ACTIVITY		23	0.364541	1.24729	0.165468	0.264293	1	2363	tags=26%, list=12%, signal=30%
KEGG_TGF_BETA_SIGNALING_PATHWAY	KEGG_TGF_BETA_SIGNALING_PATHWAY		76	0.266631	1.24174	0.115385	0.271246	1	2482	tags=21%, list=13%, signal=24%
REACTOME_DOWNREGULATION_OF_ERBB2_SIGNALING	REACTOME_DOWNREGULATION_OF_ERBB2_SIGNALING		28	0.334536	1.2281	0.177419	0.290082	1	5437	tags=39%, list=28%, signal=54%
REACTOME_EGFR_DOWNREGULATION	REACTOME_EGFR_DOWNREGULATION		30	0.327006	1.22766	0.167364	0.289377	1	1581	tags=23%, list=8%, signal=25%
REACTOME_TRANSCRIPTIONAL_REGULATION_OF_WHITE_ADIPOCYTE_DIFFERENTIATION	REACTOME_TRANSCRIPTIONAL_REGULATION_OF_WHITE_ADIPOCYTE_DIFFERENTIATION		80	0.255759	1.2258	0.0615385	0.290895	1	3253	tags=28%, list=17%, signal=33%
REACTOME_DDX58_IFIH1_MEDIATED_INDUCTION_OF_INTERFERON_ALPHA_BETA	REACTOME_DDX58_IFIH1_MEDIATED_INDUCTION_OF_INTERFERON_ALPHA_BETA		65	0.270168	1.22512	0.1	0.290651	1	1666	tags=20%, list=8%, signal=22%
REACTOME_NOTCH1_INTRACELLULAR_DOMAIN_REGULATES_TRANSCRIPTION	REACTOME_NOTCH1_INTRACELLULAR_DOMAIN_REGULATES_TRANSCRIPTION		48	0.293005	1.22367	0.131455	0.291589	1	3030	tags=29%, list=15%, signal=34%
KEGG_PATHWAYS_IN_CANCER	KEGG_PATHWAYS_IN_CANCER		283	0.215884	1.22356	0	0.290517	1	4504	tags=34%, list=23%, signal=44%
REACTOME_SYNTHESIS_OF_LEUKOTRIENES_LT_AND_EOXINS_EX	REACTOME_SYNTHESIS_OF_LEUKOTRIENES_LT_AND_EOXINS_EX		15	0.390186	1.22201	0.180723	0.291614	1	2336	tags=27%, list=12%, signal=30%
REACTOME_ACTIVATION_OF_KAINATE_RECEPTORS_UPON_GLUTAMATE_BINDING	REACTOME_ACTIVATION_OF_KAINATE_RECEPTORS_UPON_GLUTAMATE_BINDING		25	0.344371	1.22116	0.172932	0.291617	1	4642	tags=40%, list=24%, signal=52%
REACTOME_MUSCLE_CONTRACTION	REACTOME_MUSCLE_CONTRACTION		147	0.226693	1.21907	0.0724638	0.293594	1	3413	tags=21%, list=17%, signal=25%
REACTOME_ADRENALINE_NORADRENALINE_INHIBITS_INSULIN_SECRETION	REACTOME_ADRENALINE_NORADRENALINE_INHIBITS_INSULIN_SECRETION		21	0.360027	1.21808	0.184669	0.293797	1	4642	tags=48%, list=24%, signal=62%
REACTOME_BMAL1_CLOCK_NPAS2_ACTIVATES_CIRCADIAN_GENE_EXPRESSION	REACTOME_BMAL1_CLOCK_NPAS2_ACTIVATES_CIRCADIAN_GENE_EXPRESSION		25	0.335995	1.21473	0.207483	0.297919	1	3082	tags=28%, list=16%, signal=33%
REACTOME_TOLL_LIKE_RECEPTOR_TLR1_TLR2_CASCADE	REACTOME_TOLL_LIKE_RECEPTOR_TLR1_TLR2_CASCADE		96	0.253804	1.21115	0.0990099	0.302377	1	1818	tags=21%, list=9%, signal=23%
REACTOME_NUCLEAR_EVENTS_KINASE_AND_TRANSCRIPTION_FACTOR_ACTIVATION	REACTOME_NUCLEAR_EVENTS_KINASE_AND_TRANSCRIPTION_FACTOR_ACTIVATION		56	0.27151	1.20876	0.0930233	0.304752	1	2421	tags=30%, list=12%, signal=35%
HALLMARK_COAGULATION	HALLMARK_COAGULATION		103	0.242158	1.20472	0.0825688	0.310025	1	4009	tags=28%, list=20%, signal=35%
KEGG_ENDOMETRIAL_CANCER	KEGG_ENDOMETRIAL_CANCER		52	0.28168	1.20467	0.125	0.308769	1	4504	tags=46%, list=23%, signal=60%
REACTOME_TRAF6_MEDIATED_NF_KB_ACTIVATION	REACTOME_TRAF6_MEDIATED_NF_KB_ACTIVATION		23	0.34222	1.20339	0.173759	0.309428	1	1070	tags=22%, list=5%, signal=23%
REACTOME_SIGNALING_BY_PDGFR_IN_DISEASE	REACTOME_SIGNALING_BY_PDGFR_IN_DISEASE		20	0.364554	1.2026	0.180769	0.309625	1	2371	tags=40%, list=12%, signal=45%
REACTOME_CRMPS_IN_SEMA3A_SIGNALING	REACTOME_CRMPS_IN_SEMA3A_SIGNALING		15	0.381829	1.20175	0.210863	0.309856	1	4713	tags=53%, list=24%, signal=70%
REACTOME_TNF_SIGNALING	REACTOME_TNF_SIGNALING		43	0.284176	1.19502	0.14554	0.31995	1	1578	tags=21%, list=8%, signal=23%
REACTOME_LAMININ_INTERACTIONS	REACTOME_LAMININ_INTERACTIONS		28	0.315942	1.19262	0.198413	0.322605	1	3649	tags=32%, list=19%, signal=39%
REACTOME_TIE2_SIGNALING	REACTOME_TIE2_SIGNALING		15	0.386389	1.18849	0.239617	0.328367	1	3765	tags=47%, list=19%, signal=58%
REACTOME_ION_HOMEOSTASIS	REACTOME_ION_HOMEOSTASIS		47	0.276819	1.18757	0.175115	0.32837	1	3075	tags=26%, list=16%, signal=30%
REACTOME_CD28_CO_STIMULATION	REACTOME_CD28_CO_STIMULATION		32	0.300717	1.18646	0.172549	0.329129	1	3561	tags=34%, list=18%, signal=42%
REACTOME_EXTRA_NUCLEAR_ESTROGEN_SIGNALING	REACTOME_EXTRA_NUCLEAR_ESTROGEN_SIGNALING		67	0.261795	1.18604	0.144578	0.328491	1	4650	tags=37%, list=24%, signal=49%
REACTOME_G_ALPHA_I_SIGNALLING_EVENTS	REACTOME_G_ALPHA_I_SIGNALLING_EVENTS		191	0.21793	1.18548	0.0476191	0.32804	1	4650	tags=32%, list=24%, signal=42%
REACTOME_RAB_GERANYLGERANYLATION	REACTOME_RAB_GERANYLGERANYLATION		59	0.262363	1.17444	0.174757	0.346719	1	2304	tags=25%, list=12%, signal=29%
REACTOME_TBC_RABGAPS	REACTOME_TBC_RABGAPS		42	0.281729	1.17293	0.191589	0.348033	1	2553	tags=29%, list=13%, signal=33%
REACTOME_NR1H3_NR1H2_REGULATE_GENE_EXPRESSION_LINKED_TO_CHOLESTEROL_TRANSPORT_AND_EFFLUX	REACTOME_NR1H3_NR1H2_REGULATE_GENE_EXPRESSION_LINKED_TO_CHOLESTEROL_TRANSPORT_AND_EFFLUX		33	0.298919	1.17065	0.201835	0.350777	1	3372	tags=36%, list=17%, signal=44%
KEGG_REGULATION_OF_ACTIN_CYTOSKELETON	KEGG_REGULATION_OF_ACTIN_CYTOSKELETON		186	0.211916	1.16553	0.0877193	0.358931	1	4491	tags=31%, list=23%, signal=39%
REACTOME_RHO_GTPASES_ACTIVATE_ROCKS	REACTOME_RHO_GTPASES_ACTIVATE_ROCKS		19	0.34654	1.16457	0.233677	0.359243	1	4347	tags=26%, list=22%, signal=34%
REACTOME_SIGNALING_BY_NOTCH3	REACTOME_SIGNALING_BY_NOTCH3		47	0.279418	1.16335	0.187192	0.359944	1	1963	tags=21%, list=10%, signal=24%
REACTOME_AMINO_ACID_TRANSPORT_ACROSS_THE_PLASMA_MEMBRANE	REACTOME_AMINO_ACID_TRANSPORT_ACROSS_THE_PLASMA_MEMBRANE		27	0.315838	1.16172	0.226923	0.361478	1	6137	tags=59%, list=31%, signal=86%
HALLMARK_HEDGEHOG_SIGNALING	HALLMARK_HEDGEHOG_SIGNALING		33	0.303016	1.15924	0.222222	0.364727	1	5287	tags=39%, list=27%, signal=54%
REACTOME_SIGNALING_BY_NTRK3_TRKC	REACTOME_SIGNALING_BY_NTRK3_TRKC		16	0.366871	1.15861	0.213115	0.364598	1	4650	tags=50%, list=24%, signal=65%
REACTOME_SMAD2_SMAD3_SMAD4_HETEROTRIMER_REGULATES_TRANSCRIPTION	REACTOME_SMAD2_SMAD3_SMAD4_HETEROTRIMER_REGULATES_TRANSCRIPTION		32	0.299745	1.15672	0.227092	0.366654	1	3381	tags=31%, list=17%, signal=38%
REACTOME_SIGNALING_BY_SCF_KIT	REACTOME_SIGNALING_BY_SCF_KIT		42	0.275263	1.15317	0.211009	0.372045	1	3561	tags=33%, list=18%, signal=41%
KEGG_RIG_I_LIKE_RECEPTOR_SIGNALING_PATHWAY	KEGG_RIG_I_LIKE_RECEPTOR_SIGNALING_PATHWAY		52	0.265348	1.15317	0.176471	0.370611	1	1693	tags=21%, list=9%, signal=23%
KEGG_RENAL_CELL_CARCINOMA	KEGG_RENAL_CELL_CARCINOMA		65	0.263454	1.15275	0.158228	0.369984	1	4102	tags=40%, list=21%, signal=50%
REACTOME_SIGNALING_BY_TGF_BETA_RECEPTOR_COMPLEX	REACTOME_SIGNALING_BY_TGF_BETA_RECEPTOR_COMPLEX		73	0.250484	1.15249	0.174242	0.369174	1	4575	tags=37%, list=23%, signal=48%
REACTOME_INTERLEUKIN_17_SIGNALING	REACTOME_INTERLEUKIN_17_SIGNALING		68	0.248152	1.15107	0.148649	0.370278	1	2814	tags=29%, list=14%, signal=34%
KEGG_LEUKOCYTE_TRANSENDOTHELIAL_MIGRATION	KEGG_LEUKOCYTE_TRANSENDOTHELIAL_MIGRATION		97	0.231452	1.14951	0.128	0.37211	1	3762	tags=26%, list=19%, signal=32%
REACTOME_EPHRIN_SIGNALING	REACTOME_EPHRIN_SIGNALING		17	0.347405	1.14581	0.257732	0.377478	1	5161	tags=53%, list=26%, signal=72%
REACTOME_GAP_JUNCTION_ASSEMBLY	REACTOME_GAP_JUNCTION_ASSEMBLY		20	0.33647	1.14121	0.260274	0.385035	1	1830	tags=20%, list=9%, signal=22%
REACTOME_TOLL_LIKE_RECEPTOR_CASCADES	REACTOME_TOLL_LIKE_RECEPTOR_CASCADES		147	0.225848	1.14063	0.184615	0.384743	1	2578	tags=21%, list=13%, signal=24%
REACTOME_MAP3K8_TPL2_DEPENDENT_MAPK1_3_ACTIVATION	REACTOME_MAP3K8_TPL2_DEPENDENT_MAPK1_3_ACTIVATION		16	0.358833	1.13939	0.279503	0.385662	1	1578	tags=31%, list=8%, signal=34%
REACTOME_RUNX1_REGULATES_GENES_INVOLVED_IN_MEGAKARYOCYTE_DIFFERENTIATION_AND_PLATELET_FUNCTION	REACTOME_RUNX1_REGULATES_GENES_INVOLVED_IN_MEGAKARYOCYTE_DIFFERENTIATION_AND_PLATELET_FUNCTION		37	0.282739	1.13894	0.199052	0.385214	1	3652	tags=38%, list=19%, signal=46%
REACTOME_UPTAKE_AND_ACTIONS_OF_BACTERIAL_TOXINS	REACTOME_UPTAKE_AND_ACTIONS_OF_BACTERIAL_TOXINS		25	0.308022	1.13764	0.241497	0.386206	1	3088	tags=28%, list=16%, signal=33%
HALLMARK_UV_RESPONSE_DN	HALLMARK_UV_RESPONSE_DN		137	0.219581	1.13762	0.131868	0.384811	1	2878	tags=21%, list=15%, signal=25%
REACTOME_NUCLEOTIDE_BINDING_DOMAIN_LEUCINE_RICH_REPEAT_CONTAINING_RECEPTOR_NLR_SIGNALING_PATHWAYS	REACTOME_NUCLEOTIDE_BINDING_DOMAIN_LEUCINE_RICH_REPEAT_CONTAINING_RECEPTOR_NLR_SIGNALING_PATHWAYS		56	0.258887	1.13448	0.216667	0.389551	1	2578	tags=27%, list=13%, signal=31%
REACTOME_INTERACTION_BETWEEN_L1_AND_ANKYRINS	REACTOME_INTERACTION_BETWEEN_L1_AND_ANKYRINS		26	0.317008	1.1272	0.281022	0.4027	1	5164	tags=35%, list=26%, signal=47%
REACTOME_SIGNALING_BY_GPCR	REACTOME_SIGNALING_BY_GPCR		429	0.192603	1.12385	0	0.407597	1	4650	tags=30%, list=24%, signal=38%
REACTOME_SIGNALING_BY_RECEPTOR_TYROSINE_KINASES	REACTOME_SIGNALING_BY_RECEPTOR_TYROSINE_KINASES		454	0.193163	1.12089	0.0909091	0.411912	1	3780	tags=26%, list=19%, signal=32%
HALLMARK_UV_RESPONSE_UP	HALLMARK_UV_RESPONSE_UP		149	0.211058	1.11743	0.183099	0.417711	1	3112	tags=25%, list=16%, signal=29%
REACTOME_SEMA4D_IN_SEMAPHORIN_SIGNALING	REACTOME_SEMA4D_IN_SEMAPHORIN_SIGNALING		24	0.305701	1.11512	0.275194	0.42103	1	4347	tags=29%, list=22%, signal=37%
REACTOME_NOD1_2_SIGNALING_PATHWAY	REACTOME_NOD1_2_SIGNALING_PATHWAY		36	0.284687	1.11433	0.297414	0.42099	1	2578	tags=31%, list=13%, signal=35%
REACTOME_CARDIAC_CONDUCTION	REACTOME_CARDIAC_CONDUCTION		97	0.229426	1.1139	0.221311	0.420221	1	5304	tags=34%, list=27%, signal=46%
REACTOME_CLASS_B_2_SECRETIN_FAMILY_RECEPTORS	REACTOME_CLASS_B_2_SECRETIN_FAMILY_RECEPTORS		55	0.250407	1.11214	0.255435	0.422243	1	6332	tags=51%, list=32%, signal=75%
REACTOME_GABA_RECEPTOR_ACTIVATION	REACTOME_GABA_RECEPTOR_ACTIVATION		44	0.267087	1.11029	0.25	0.424808	1	5895	tags=45%, list=30%, signal=65%
REACTOME_G_ALPHA_Q_SIGNALLING_EVENTS	REACTOME_G_ALPHA_Q_SIGNALLING_EVENTS		129	0.21988	1.11016	0.139785	0.423503	1	5385	tags=40%, list=27%, signal=54%
HALLMARK_INTERFERON_GAMMA_RESPONSE	HALLMARK_INTERFERON_GAMMA_RESPONSE		198	0.212366	1.10221	0.0930233	0.43931	1	2813	tags=22%, list=14%, signal=26%
REACTOME_PURINERGIC_SIGNALING_IN_LEISHMANIASIS_INFECTION	REACTOME_PURINERGIC_SIGNALING_IN_LEISHMANIASIS_INFECTION		25	0.318434	1.09877	0.285714	0.445017	1	4414	tags=36%, list=22%, signal=46%
REACTOME_DEATH_RECEPTOR_SIGNALLING	REACTOME_DEATH_RECEPTOR_SIGNALLING		131	0.213566	1.09624	0.215909	0.44906	1	4462	tags=34%, list=23%, signal=43%
REACTOME_SIGNALING_BY_EGFR	REACTOME_SIGNALING_BY_EGFR		48	0.263906	1.09466	0.292793	0.451009	1	3476	tags=29%, list=18%, signal=35%
REACTOME_SIGNALING_BY_PTK6	REACTOME_SIGNALING_BY_PTK6		54	0.248689	1.09302	0.273148	0.453129	1	3561	tags=28%, list=18%, signal=34%
REACTOME_BLOOD_GROUP_SYSTEMS_BIOSYNTHESIS	REACTOME_BLOOD_GROUP_SYSTEMS_BIOSYNTHESIS		17	0.344083	1.09291	0.317726	0.451859	1	209	tags=12%, list=1%, signal=12%
REACTOME_CELL_JUNCTION_ORGANIZATION	REACTOME_CELL_JUNCTION_ORGANIZATION		67	0.240887	1.09017	0.259036	0.456228	1	4466	tags=30%, list=23%, signal=38%
REACTOME_TRANSCRIPTIONAL_REGULATION_OF_GRANULOPOIESIS	REACTOME_TRANSCRIPTIONAL_REGULATION_OF_GRANULOPOIESIS		30	0.284589	1.08997	0.316667	0.455036	1	4175	tags=33%, list=21%, signal=42%
REACTOME_SIGNALLING_TO_RAS	REACTOME_SIGNALLING_TO_RAS		19	0.328511	1.08852	0.327465	0.456481	1	3709	tags=42%, list=19%, signal=52%
REACTOME_SIGNALING_BY_NOTCH2	REACTOME_SIGNALING_BY_NOTCH2		32	0.278068	1.08788	0.296578	0.45645	1	5267	tags=38%, list=27%, signal=51%
REACTOME_NEGATIVE_REGULATION_OF_FLT3	REACTOME_NEGATIVE_REGULATION_OF_FLT3		15	0.350023	1.08683	0.332317	0.457468	1	2381	tags=27%, list=12%, signal=30%
REACTOME_RUNX2_REGULATES_OSTEOBLAST_DIFFERENTIATION	REACTOME_RUNX2_REGULATES_OSTEOBLAST_DIFFERENTIATION		22	0.31652	1.08411	0.316327	0.462004	1	2259	tags=23%, list=11%, signal=26%
REACTOME_SIGNALING_BY_FGFR_IN_DISEASE	REACTOME_SIGNALING_BY_FGFR_IN_DISEASE		53	0.246315	1.08406	0.302564	0.460568	1	3855	tags=34%, list=20%, signal=42%
REACTOME_GAB1_SIGNALOSOME	REACTOME_GAB1_SIGNALOSOME		16	0.34599	1.0838	0.347826	0.459685	1	5417	tags=56%, list=28%, signal=78%
REACTOME_RA_BIOSYNTHESIS_PATHWAY	REACTOME_RA_BIOSYNTHESIS_PATHWAY		18	0.328847	1.08242	0.345395	0.46107	1	3450	tags=33%, list=18%, signal=40%
REACTOME_CELL_CELL_JUNCTION_ORGANIZATION	REACTOME_CELL_CELL_JUNCTION_ORGANIZATION		42	0.264909	1.08108	0.31982	0.462484	1	4466	tags=36%, list=23%, signal=46%
KEGG_LONG_TERM_POTENTIATION	KEGG_LONG_TERM_POTENTIATION		61	0.236763	1.08057	0.301136	0.462148	1	3940	tags=28%, list=20%, signal=35%
KEGG_FC_GAMMA_R_MEDIATED_PHAGOCYTOSIS	KEGG_FC_GAMMA_R_MEDIATED_PHAGOCYTOSIS		94	0.223235	1.0763	0.307692	0.470089	1	4088	tags=28%, list=21%, signal=35%
REACTOME_DAP12_SIGNALING	REACTOME_DAP12_SIGNALING		27	0.292446	1.07595	0.316667	0.46928	1	3561	tags=37%, list=18%, signal=45%
REACTOME_INTERLEUKIN_20_FAMILY_SIGNALING	REACTOME_INTERLEUKIN_20_FAMILY_SIGNALING		17	0.334898	1.07563	0.338762	0.468451	1	2289	tags=29%, list=12%, signal=33%
REACTOME_CARGO_RECOGNITION_FOR_CLATHRIN_MEDIATED_ENDOCYTOSIS	REACTOME_CARGO_RECOGNITION_FOR_CLATHRIN_MEDIATED_ENDOCYTOSIS		92	0.225408	1.06393	0.312	0.493552	1	1764	tags=21%, list=9%, signal=23%
KEGG_NEUROACTIVE_LIGAND_RECEPTOR_INTERACTION	KEGG_NEUROACTIVE_LIGAND_RECEPTOR_INTERACTION		135	0.204732	1.06233	0.315789	0.495857	1	6491	tags=41%, list=33%, signal=60%
REACTOME_FOXO_MEDIATED_TRANSCRIPTION_OF_OXIDATIVE_STRESS_METABOLIC_AND_NEURONAL_GENES	REACTOME_FOXO_MEDIATED_TRANSCRIPTION_OF_OXIDATIVE_STRESS_METABOLIC_AND_NEURONAL_GENES		23	0.29763	1.06056	0.367347	0.498482	1	2219	tags=26%, list=11%, signal=29%
REACTOME_P75_NTR_RECEPTOR_MEDIATED_SIGNALLING	REACTOME_P75_NTR_RECEPTOR_MEDIATED_SIGNALLING		89	0.219893	1.05791	0.251799	0.503169	1	4462	tags=36%, list=23%, signal=46%
KEGG_TASTE_TRANSDUCTION	KEGG_TASTE_TRANSDUCTION		20	0.313111	1.05744	0.325259	0.502545	1	4970	tags=30%, list=25%, signal=40%
KEGG_ARRHYTHMOGENIC_RIGHT_VENTRICULAR_CARDIOMYOPATHY_ARVC	KEGG_ARRHYTHMOGENIC_RIGHT_VENTRICULAR_CARDIOMYOPATHY_ARVC		62	0.238711	1.05684	0.350515	0.502565	1	4545	tags=31%, list=23%, signal=40%
KEGG_GAP_JUNCTION	KEGG_GAP_JUNCTION		73	0.222332	1.04969	0.352941	0.518442	1	4785	tags=32%, list=24%, signal=41%
REACTOME_MYOGENESIS	REACTOME_MYOGENESIS		24	0.29721	1.04706	0.366438	0.522974	1	1918	tags=21%, list=10%, signal=23%
REACTOME_TRANSPORT_OF_CONNEXONS_TO_THE_PLASMA_MEMBRANE	REACTOME_TRANSPORT_OF_CONNEXONS_TO_THE_PLASMA_MEMBRANE		15	0.343668	1.04602	0.385621	0.523727	1	1830	tags=20%, list=9%, signal=22%
REACTOME_SIGNALING_BY_THE_B_CELL_RECEPTOR_BCR	REACTOME_SIGNALING_BY_THE_B_CELL_RECEPTOR_BCR		164	0.19134	1.04134	0.324675	0.53329	1	4244	tags=33%, list=22%, signal=42%
REACTOME_SPRY_REGULATION_OF_FGF_SIGNALING	REACTOME_SPRY_REGULATION_OF_FGF_SIGNALING		16	0.328447	1.03972	0.386139	0.53536	1	1818	tags=25%, list=9%, signal=28%
HALLMARK_COMPLEMENT	HALLMARK_COMPLEMENT		178	0.190804	1.0388	0.333333	0.535843	1	4907	tags=32%, list=25%, signal=42%
REACTOME_NRAGE_SIGNALS_DEATH_THROUGH_JNK	REACTOME_NRAGE_SIGNALS_DEATH_THROUGH_JNK		54	0.233246	1.03827	0.373057	0.535417	1	4617	tags=37%, list=23%, signal=48%
REACTOME_TGF_BETA_RECEPTOR_SIGNALING_IN_EMT_EPITHELIAL_TO_MESENCHYMAL_TRANSITION	REACTOME_TGF_BETA_RECEPTOR_SIGNALING_IN_EMT_EPITHELIAL_TO_MESENCHYMAL_TRANSITION		16	0.322973	1.03761	0.360856	0.535254	1	4457	tags=50%, list=23%, signal=65%
REACTOME_REGULATION_OF_KIT_SIGNALING	REACTOME_REGULATION_OF_KIT_SIGNALING		16	0.334457	1.03407	0.374593	0.542186	1	5639	tags=63%, list=29%, signal=88%
REACTOME_ADP_SIGNALLING_THROUGH_P2Y_PURINOCEPTOR_1	REACTOME_ADP_SIGNALLING_THROUGH_P2Y_PURINOCEPTOR_1		20	0.299135	1.02891	0.374582	0.553123	1	4650	tags=55%, list=24%, signal=72%
KEGG_THYROID_CANCER	KEGG_THYROID_CANCER		27	0.283285	1.02703	0.392593	0.556088	1	4504	tags=48%, list=23%, signal=62%
REACTOME_ESR_MEDIATED_SIGNALING	REACTOME_ESR_MEDIATED_SIGNALING		152	0.197331	1.02645	0.341772	0.555653	1	4650	tags=35%, list=24%, signal=45%
HALLMARK_CHOLESTEROL_HOMEOSTASIS	HALLMARK_CHOLESTEROL_HOMEOSTASIS		71	0.219439	1.02128	0.352601	0.566721	1	974	tags=13%, list=5%, signal=13%
REACTOME_CASPASE_ACTIVATION_VIA_DEATH_RECEPTORS_IN_THE_PRESENCE_OF_LIGAND	REACTOME_CASPASE_ACTIVATION_VIA_DEATH_RECEPTORS_IN_THE_PRESENCE_OF_LIGAND		15	0.330585	1.01891	0.39404	0.571039	1	895	tags=20%, list=5%, signal=21%
KEGG_VEGF_SIGNALING_PATHWAY	KEGG_VEGF_SIGNALING_PATHWAY		64	0.226299	1.018	0.377049	0.571407	1	3915	tags=31%, list=20%, signal=39%
KEGG_LONG_TERM_DEPRESSION	KEGG_LONG_TERM_DEPRESSION		55	0.229954	1.01378	0.414508	0.580078	1	3940	tags=29%, list=20%, signal=36%
REACTOME_TNFR1_INDUCED_NFKAPPAB_SIGNALING_PATHWAY	REACTOME_TNFR1_INDUCED_NFKAPPAB_SIGNALING_PATHWAY		29	0.266001	1.01329	0.403774	0.57966	1	1578	tags=21%, list=8%, signal=22%
REACTOME_FCERI_MEDIATED_NF_KB_ACTIVATION	REACTOME_FCERI_MEDIATED_NF_KB_ACTIVATION		133	0.196061	1.0118	0.466667	0.581773	1	4575	tags=35%, list=23%, signal=46%
REACTOME_NR1H2_AND_NR1H3_MEDIATED_SIGNALING	REACTOME_NR1H2_AND_NR1H3_MEDIATED_SIGNALING		40	0.248824	1.00852	0.415525	0.588365	1	3560	tags=33%, list=18%, signal=40%
REACTOME_VISUAL_PHOTOTRANSDUCTION	REACTOME_VISUAL_PHOTOTRANSDUCTION		65	0.220707	1.00703	0.428571	0.590295	1	3897	tags=28%, list=20%, signal=34%
REACTOME_RAC1_GTPASE_CYCLE	REACTOME_RAC1_GTPASE_CYCLE		170	0.189364	1.00549	0.392157	0.592423	1	4256	tags=25%, list=22%, signal=32%
REACTOME_GLUCAGON_LIKE_PEPTIDE_1_GLP1_REGULATES_INSULIN_SECRETION	REACTOME_GLUCAGON_LIKE_PEPTIDE_1_GLP1_REGULATES_INSULIN_SECRETION		33	0.259597	1.00409	0.463964	0.594331	1	4642	tags=39%, list=24%, signal=51%
REACTOME_TGF_BETA_RECEPTOR_SIGNALING_ACTIVATES_SMADS	REACTOME_TGF_BETA_RECEPTOR_SIGNALING_ACTIVATES_SMADS		32	0.251918	1.00392	0.435294	0.593	1	2039	tags=22%, list=10%, signal=24%
REACTOME_ABERRANT_REGULATION_OF_MITOTIC_G1_S_TRANSITION_IN_CANCER_DUE_TO_RB1_DEFECTS	REACTOME_ABERRANT_REGULATION_OF_MITOTIC_G1_S_TRANSITION_IN_CANCER_DUE_TO_RB1_DEFECTS		17	0.304757	1.00222	0.425325	0.59539	1	518	tags=18%, list=3%, signal=18%
REACTOME_CASPASE_ACTIVATION_VIA_EXTRINSIC_APOPTOTIC_SIGNALLING_PATHWAY	REACTOME_CASPASE_ACTIVATION_VIA_EXTRINSIC_APOPTOTIC_SIGNALLING_PATHWAY		24	0.278425	1.00166	0.424354	0.594983	1	923	tags=17%, list=5%, signal=17%
REACTOME_DOWNREGULATION_OF_TGF_BETA_RECEPTOR_SIGNALING	REACTOME_DOWNREGULATION_OF_TGF_BETA_RECEPTOR_SIGNALING		26	0.276045	1.0015	0.414035	0.593453	1	2039	tags=23%, list=10%, signal=26%
REACTOME_ATTENUATION_PHASE	REACTOME_ATTENUATION_PHASE		25	0.285909	0.998015	0.457031	0.60086	1	3727	tags=40%, list=19%, signal=49%
REACTOME_ADORA2B_MEDIATED_ANTI_INFLAMMATORY_CYTOKINES_PRODUCTION	REACTOME_ADORA2B_MEDIATED_ANTI_INFLAMMATORY_CYTOKINES_PRODUCTION		74	0.207971	0.996671	0.461039	0.602688	1	4888	tags=31%, list=25%, signal=41%
HALLMARK_ESTROGEN_RESPONSE_EARLY	HALLMARK_ESTROGEN_RESPONSE_EARLY		181	0.185043	0.994796	0.405797	0.605321	1	3774	tags=24%, list=19%, signal=29%
REACTOME_ADHERENS_JUNCTIONS_INTERACTIONS	REACTOME_ADHERENS_JUNCTIONS_INTERACTIONS		23	0.286889	0.99435	0.475836	0.604635	1	2480	tags=22%, list=13%, signal=25%
REACTOME_SUMOYLATION_OF_INTRACELLULAR_RECEPTORS	REACTOME_SUMOYLATION_OF_INTRACELLULAR_RECEPTORS		28	0.267879	0.992398	0.431907	0.607586	1	4006	tags=36%, list=20%, signal=45%
REACTOME_INLB_MEDIATED_ENTRY_OF_LISTERIA_MONOCYTOGENES_INTO_HOST_CELL	REACTOME_INLB_MEDIATED_ENTRY_OF_LISTERIA_MONOCYTOGENES_INTO_HOST_CELL		15	0.323136	0.990304	0.459364	0.611286	1	1581	tags=27%, list=8%, signal=29%
REACTOME_SIGNAL_AMPLIFICATION	REACTOME_SIGNAL_AMPLIFICATION		25	0.270352	0.985378	0.463504	0.622349	1	4650	tags=48%, list=24%, signal=63%
KEGG_HYPERTROPHIC_CARDIOMYOPATHY_HCM	KEGG_HYPERTROPHIC_CARDIOMYOPATHY_HCM		65	0.210835	0.984992	0.506173	0.621529	1	1230	tags=12%, list=6%, signal=13%
REACTOME_INTEGRIN_SIGNALING	REACTOME_INTEGRIN_SIGNALING		24	0.275116	0.983076	0.44964	0.624587	1	1976	tags=17%, list=10%, signal=19%
REACTOME_INTERLEUKIN_RECEPTOR_SHC_SIGNALING	REACTOME_INTERLEUKIN_RECEPTOR_SHC_SIGNALING		22	0.281279	0.979364	0.520446	0.632183	1	3808	tags=36%, list=19%, signal=45%
REACTOME_EPHB_MEDIATED_FORWARD_SIGNALING	REACTOME_EPHB_MEDIATED_FORWARD_SIGNALING		39	0.238579	0.977897	0.50431	0.634083	1	3781	tags=28%, list=19%, signal=35%
REACTOME_FC_EPSILON_RECEPTOR_FCERI_SIGNALING	REACTOME_FC_EPSILON_RECEPTOR_FCERI_SIGNALING		183	0.179768	0.977746	0.586207	0.632727	1	4575	tags=34%, list=23%, signal=44%
KEGG_PRION_DISEASES	KEGG_PRION_DISEASES		29	0.261513	0.975583	0.52549	0.636792	1	4002	tags=31%, list=20%, signal=39%
REACTOME_G_ALPHA_12_13_SIGNALLING_EVENTS	REACTOME_G_ALPHA_12_13_SIGNALLING_EVENTS		68	0.211989	0.972144	0.546961	0.644017	1	4642	tags=37%, list=24%, signal=48%
KEGG_NOTCH_SIGNALING_PATHWAY	KEGG_NOTCH_SIGNALING_PATHWAY		44	0.227628	0.969664	0.505102	0.648279	1	3191	tags=27%, list=16%, signal=32%
REACTOME_DOPAMINE_NEUROTRANSMITTER_RELEASE_CYCLE	REACTOME_DOPAMINE_NEUROTRANSMITTER_RELEASE_CYCLE		18	0.289933	0.961198	0.492701	0.667959	1	3753	tags=33%, list=19%, signal=41%
REACTOME_REGULATION_OF_INSULIN_SECRETION	REACTOME_REGULATION_OF_INSULIN_SECRETION		61	0.210626	0.958816	0.578947	0.672205	1	4642	tags=34%, list=24%, signal=45%
KEGG_FC_EPSILON_RI_SIGNALING_PATHWAY	KEGG_FC_EPSILON_RI_SIGNALING_PATHWAY		63	0.213435	0.958396	0.52	0.671383	1	3915	tags=32%, list=20%, signal=40%
REACTOME_SIGNALING_BY_NUCLEAR_RECEPTORS	REACTOME_SIGNALING_BY_NUCLEAR_RECEPTORS		214	0.17481	0.958366	0.6	0.669561	1	4682	tags=34%, list=24%, signal=44%
KEGG_GNRH_SIGNALING_PATHWAY	KEGG_GNRH_SIGNALING_PATHWAY		80	0.206333	0.957264	0.540698	0.670592	1	4002	tags=30%, list=20%, signal=38%
REACTOME_KERATAN_SULFATE_BIOSYNTHESIS	REACTOME_KERATAN_SULFATE_BIOSYNTHESIS		23	0.269794	0.95286	0.494505	0.679851	1	5021	tags=43%, list=26%, signal=58%
REACTOME_CELL_CELL_COMMUNICATION	REACTOME_CELL_CELL_COMMUNICATION		98	0.188498	0.949229	0.594828	0.686984	1	4482	tags=28%, list=23%, signal=36%
REACTOME_NEGATIVE_REGULATION_OF_MAPK_PATHWAY	REACTOME_NEGATIVE_REGULATION_OF_MAPK_PATHWAY		42	0.233752	0.942505	0.566138	0.702651	1	4177	tags=33%, list=21%, signal=42%
REACTOME_CD28_DEPENDENT_PI3K_AKT_SIGNALING	REACTOME_CD28_DEPENDENT_PI3K_AKT_SIGNALING		21	0.272939	0.936542	0.547703	0.715449	1	3316	tags=29%, list=17%, signal=34%
REACTOME_INTERLEUKIN_12_FAMILY_SIGNALING	REACTOME_INTERLEUKIN_12_FAMILY_SIGNALING		54	0.211876	0.936152	0.590909	0.71432	1	2289	tags=19%, list=12%, signal=21%
REACTOME_PLATELET_AGGREGATION_PLUG_FORMATION	REACTOME_PLATELET_AGGREGATION_PLUG_FORMATION		32	0.244789	0.933634	0.579592	0.718657	1	3490	tags=22%, list=18%, signal=27%
REACTOME_ASSEMBLY_OF_THE_HIV_VIRION	REACTOME_ASSEMBLY_OF_THE_HIV_VIRION		16	0.294639	0.930933	0.52921	0.723566	1	1578	tags=25%, list=8%, signal=27%
REACTOME_CELL_DEATH_SIGNALLING_VIA_NRAGE_NRIF_AND_NADE	REACTOME_CELL_DEATH_SIGNALLING_VIA_NRAGE_NRIF_AND_NADE		70	0.200058	0.928702	0.648045	0.726897	1	4617	tags=34%, list=23%, signal=45%
REACTOME_SIGNALING_BY_INSULIN_RECEPTOR	REACTOME_SIGNALING_BY_INSULIN_RECEPTOR		61	0.202213	0.928692	0.629032	0.724909	1	3855	tags=31%, list=20%, signal=39%
REACTOME_INFLAMMASOMES	REACTOME_INFLAMMASOMES		21	0.272482	0.926532	0.596899	0.728538	1	3606	tags=33%, list=18%, signal=41%
REACTOME_REGULATION_OF_MECP2_EXPRESSION_AND_ACTIVITY	REACTOME_REGULATION_OF_MECP2_EXPRESSION_AND_ACTIVITY		31	0.240148	0.92476	0.57438	0.730934	1	3143	tags=29%, list=16%, signal=34%
REACTOME_TICAM1_RIP1_MEDIATED_IKK_COMPLEX_RECRUITMENT	REACTOME_TICAM1_RIP1_MEDIATED_IKK_COMPLEX_RECRUITMENT		19	0.271587	0.914854	0.598071	0.753264	1	2363	tags=26%, list=12%, signal=30%
REACTOME_SYNTHESIS_OF_PIPS_AT_THE_PLASMA_MEMBRANE	REACTOME_SYNTHESIS_OF_PIPS_AT_THE_PLASMA_MEMBRANE		52	0.210208	0.912766	0.670103	0.756314	1	2433	tags=21%, list=12%, signal=24%
KEGG_GLIOMA	KEGG_GLIOMA		62	0.202053	0.910666	0.638889	0.759609	1	3915	tags=32%, list=20%, signal=40%
REACTOME_CELL_EXTRACELLULAR_MATRIX_INTERACTIONS	REACTOME_CELL_EXTRACELLULAR_MATRIX_INTERACTIONS		18	0.277767	0.910451	0.58804	0.758108	1	1594	tags=17%, list=8%, signal=18%
REACTOME_GROWTH_HORMONE_RECEPTOR_SIGNALING	REACTOME_GROWTH_HORMONE_RECEPTOR_SIGNALING		21	0.265006	0.903353	0.588448	0.772955	1	2289	tags=24%, list=12%, signal=27%
KEGG_AXON_GUIDANCE	KEGG_AXON_GUIDANCE		112	0.181036	0.901271	0.764706	0.77618	1	3859	tags=22%, list=20%, signal=28%
HALLMARK_WNT_BETA_CATENIN_SIGNALING	HALLMARK_WNT_BETA_CATENIN_SIGNALING		38	0.222836	0.900834	0.625	0.775193	1	2743	tags=24%, list=14%, signal=27%
REACTOME_NEPHRIN_FAMILY_INTERACTIONS	REACTOME_NEPHRIN_FAMILY_INTERACTIONS		20	0.263522	0.894227	0.616858	0.788803	1	5486	tags=40%, list=28%, signal=55%
REACTOME_RHO_GTPASES_ACTIVATE_IQGAPS	REACTOME_RHO_GTPASES_ACTIVATE_IQGAPS		26	0.242328	0.892629	0.644788	0.79049	1	885	tags=12%, list=4%, signal=12%
REACTOME_ACTIVATION_OF_BAD_AND_TRANSLOCATION_TO_MITOCHONDRIA	REACTOME_ACTIVATION_OF_BAD_AND_TRANSLOCATION_TO_MITOCHONDRIA		15	0.284251	0.887205	0.657658	0.801079	1	2266	tags=27%, list=12%, signal=30%
REACTOME_L1CAM_INTERACTIONS	REACTOME_L1CAM_INTERACTIONS		107	0.174276	0.885531	0.78125	0.802896	1	5513	tags=32%, list=28%, signal=44%
REACTOME_TNFS_BIND_THEIR_PHYSIOLOGICAL_RECEPTORS	REACTOME_TNFS_BIND_THEIR_PHYSIOLOGICAL_RECEPTORS		24	0.252161	0.885291	0.647541	0.801317	1	4109	tags=29%, list=21%, signal=37%
REACTOME_ACTIVATION_OF_IRF3_IRF7_MEDIATED_BY_TBK1_IKK_EPSILON	REACTOME_ACTIVATION_OF_IRF3_IRF7_MEDIATED_BY_TBK1_IKK_EPSILON		17	0.272887	0.885208	0.614334	0.799349	1	1578	tags=18%, list=8%, signal=19%
KEGG_WNT_SIGNALING_PATHWAY	KEGG_WNT_SIGNALING_PATHWAY		128	0.171019	0.884601	0.782051	0.798492	1	3712	tags=23%, list=19%, signal=29%
REACTOME_GAP_JUNCTION_TRAFFICKING_AND_REGULATION	REACTOME_GAP_JUNCTION_TRAFFICKING_AND_REGULATION		33	0.227139	0.88366	0.706897	0.79854	1	2666	tags=21%, list=14%, signal=24%
REACTOME_DEPOLYMERISATION_OF_THE_NUCLEAR_LAMINA	REACTOME_DEPOLYMERISATION_OF_THE_NUCLEAR_LAMINA		15	0.289244	0.881856	0.626543	0.800468	1	2123	tags=27%, list=11%, signal=30%
REACTOME_METALLOPROTEASE_DUBS	REACTOME_METALLOPROTEASE_DUBS		17	0.277195	0.880035	0.618375	0.802433	1	3687	tags=41%, list=19%, signal=51%
KEGG_PRIMARY_IMMUNODEFICIENCY	KEGG_PRIMARY_IMMUNODEFICIENCY		31	0.229257	0.880022	0.683333	0.800358	1	2740	tags=26%, list=14%, signal=30%
REACTOME_SIGNALING_BY_NOTCH1_PEST_DOMAIN_MUTANTS_IN_CANCER	REACTOME_SIGNALING_BY_NOTCH1_PEST_DOMAIN_MUTANTS_IN_CANCER		57	0.201228	0.874654	0.744318	0.810437	1	2935	tags=21%, list=15%, signal=25%
REACTOME_SENSORY_PERCEPTION	REACTOME_SENSORY_PERCEPTION		137	0.168651	0.871257	0.92	0.815674	1	3936	tags=23%, list=20%, signal=29%
REACTOME_METABOLISM_OF_FAT_SOLUBLE_VITAMINS	REACTOME_METABOLISM_OF_FAT_SOLUBLE_VITAMINS		32	0.22334	0.86482	0.692308	0.827648	1	6270	tags=56%, list=32%, signal=82%
REACTOME_GASTRIN_CREB_SIGNALLING_PATHWAY_VIA_PKC_AND_MAPK	REACTOME_GASTRIN_CREB_SIGNALLING_PATHWAY_VIA_PKC_AND_MAPK		15	0.27376	0.861088	0.673846	0.833391	1	5639	tags=53%, list=29%, signal=75%
HALLMARK_APICAL_JUNCTION	HALLMARK_APICAL_JUNCTION		166	0.157137	0.858597	0.921875	0.836385	1	5272	tags=31%, list=27%, signal=42%
REACTOME_SIGNALING_BY_NOTCH1	REACTOME_SIGNALING_BY_NOTCH1		73	0.184833	0.858342	0.802469	0.834743	1	3030	tags=21%, list=15%, signal=24%
REACTOME_NITRIC_OXIDE_STIMULATES_GUANYLATE_CYCLASE	REACTOME_NITRIC_OXIDE_STIMULATES_GUANYLATE_CYCLASE		16	0.274484	0.857291	0.648562	0.834817	1	3374	tags=25%, list=17%, signal=30%
REACTOME_SMOOTH_MUSCLE_CONTRACTION	REACTOME_SMOOTH_MUSCLE_CONTRACTION		31	0.225685	0.857119	0.731225	0.833042	1	2438	tags=16%, list=12%, signal=18%
REACTOME_RUNX2_REGULATES_BONE_DEVELOPMENT	REACTOME_RUNX2_REGULATES_BONE_DEVELOPMENT		26	0.23614	0.856257	0.673307	0.832516	1	2259	tags=19%, list=11%, signal=22%
KEGG_TYPE_II_DIABETES_MELLITUS	KEGG_TYPE_II_DIABETES_MELLITUS		40	0.205653	0.848146	0.776786	0.847913	1	3762	tags=28%, list=19%, signal=34%
REACTOME_AMYLOID_FIBER_FORMATION	REACTOME_AMYLOID_FIBER_FORMATION		38	0.21534	0.845903	0.764957	0.849992	1	2607	tags=16%, list=13%, signal=18%
REACTOME_CTLA4_INHIBITORY_SIGNALING	REACTOME_CTLA4_INHIBITORY_SIGNALING		20	0.244485	0.845604	0.690236	0.848409	1	2839	tags=25%, list=14%, signal=29%
REACTOME_PRE_NOTCH_EXPRESSION_AND_PROCESSING	REACTOME_PRE_NOTCH_EXPRESSION_AND_PROCESSING		49	0.198208	0.844361	0.794595	0.848597	1	4572	tags=39%, list=23%, signal=50%
REACTOME_DEFECTIVE_B4GALT7_CAUSES_EDS_PROGEROID_TYPE	REACTOME_DEFECTIVE_B4GALT7_CAUSES_EDS_PROGEROID_TYPE		18	0.252916	0.841724	0.700637	0.851449	1	3091	tags=28%, list=16%, signal=33%
REACTOME_RAP1_SIGNALLING	REACTOME_RAP1_SIGNALLING		15	0.273571	0.841634	0.658307	0.84949	1	1976	tags=13%, list=10%, signal=15%
REACTOME_PLATELET_ACTIVATION_SIGNALING_AND_AGGREGATION	REACTOME_PLATELET_ACTIVATION_SIGNALING_AND_AGGREGATION		228	0.150825	0.830061	0.976744	0.869246	1	4433	tags=25%, list=23%, signal=31%
REACTOME_SIGNAL_TRANSDUCTION_BY_L1	REACTOME_SIGNAL_TRANSDUCTION_BY_L1		21	0.239163	0.827299	0.749049	0.87191	1	5471	tags=43%, list=28%, signal=59%
REACTOME_G_ALPHA_Z_SIGNALLING_EVENTS	REACTOME_G_ALPHA_Z_SIGNALLING_EVENTS		38	0.201574	0.811391	0.79476	0.897543	1	4642	tags=29%, list=24%, signal=38%
REACTOME_LONG_TERM_POTENTIATION	REACTOME_LONG_TERM_POTENTIATION		20	0.234024	0.80074	0.796407	0.91258	1	5519	tags=40%, list=28%, signal=56%
REACTOME_TRP_CHANNELS	REACTOME_TRP_CHANNELS		22	0.227392	0.796118	0.790076	0.917533	1	3102	tags=27%, list=16%, signal=32%
REACTOME_TIGHT_JUNCTION_INTERACTIONS	REACTOME_TIGHT_JUNCTION_INTERACTIONS		17	0.245072	0.793241	0.766784	0.919655	1	4369	tags=41%, list=22%, signal=53%
REACTOME_NEURONAL_SYSTEM	REACTOME_NEURONAL_SYSTEM		298	0.141071	0.790482	1	0.92152	1	4650	tags=26%, list=24%, signal=33%
KEGG_TIGHT_JUNCTION	KEGG_TIGHT_JUNCTION		107	0.16186	0.788973	0.92	0.921399	1	4371	tags=25%, list=22%, signal=32%
REACTOME_GLUTAMATE_NEUROTRANSMITTER_RELEASE_CYCLE	REACTOME_GLUTAMATE_NEUROTRANSMITTER_RELEASE_CYCLE		19	0.241277	0.788089	0.778502	0.920441	1	3701	tags=32%, list=19%, signal=39%
KEGG_HEDGEHOG_SIGNALING_PATHWAY	KEGG_HEDGEHOG_SIGNALING_PATHWAY		38	0.195769	0.788062	0.875	0.918238	1	4929	tags=37%, list=25%, signal=49%
REACTOME_RHO_GTPASES_ACTIVATE_PAKS	REACTOME_RHO_GTPASES_ACTIVATE_PAKS		21	0.226677	0.787748	0.80339	0.916535	1	4017	tags=24%, list=20%, signal=30%
REACTOME_INTERLEUKIN_37_SIGNALING	REACTOME_INTERLEUKIN_37_SIGNALING		19	0.228019	0.782465	0.799342	0.921844	1	2289	tags=16%, list=12%, signal=18%
REACTOME_PINK1_PRKN_MEDIATED_MITOPHAGY	REACTOME_PINK1_PRKN_MEDIATED_MITOPHAGY		20	0.225962	0.770315	0.775862	0.936589	1	3656	tags=30%, list=19%, signal=37%
REACTOME_NRIF_SIGNALS_CELL_DEATH_FROM_THE_NUCLEUS	REACTOME_NRIF_SIGNALS_CELL_DEATH_FROM_THE_NUCLEUS		15	0.24751	0.769621	0.774295	0.935151	1	4462	tags=33%, list=23%, signal=43%
REACTOME_CDC42_GTPASE_CYCLE	REACTOME_CDC42_GTPASE_CYCLE		150	0.147889	0.769165	0.971429	0.93345	1	2298	tags=13%, list=12%, signal=15%
REACTOME_GLUCAGON_SIGNALING_IN_METABOLIC_REGULATION	REACTOME_GLUCAGON_SIGNALING_IN_METABOLIC_REGULATION		27	0.203845	0.766637	0.827068	0.934418	1	4642	tags=37%, list=24%, signal=48%
REACTOME_RESPONSE_TO_ELEVATED_PLATELET_CYTOSOLIC_CA2	REACTOME_RESPONSE_TO_ELEVATED_PLATELET_CYTOSOLIC_CA2		119	0.148623	0.758378	0.963964	0.94272	1	3708	tags=18%, list=19%, signal=23%
KEGG_MELANOGENESIS	KEGG_MELANOGENESIS		83	0.158945	0.756364	0.966387	0.942898	1	3984	tags=25%, list=20%, signal=32%
REACTOME_DECTIN_2_FAMILY	REACTOME_DECTIN_2_FAMILY		19	0.222677	0.746857	0.874587	0.951408	1	3543	tags=21%, list=18%, signal=26%
HALLMARK_PANCREAS_BETA_CELLS	HALLMARK_PANCREAS_BETA_CELLS		20	0.221381	0.742742	0.866197	0.953696	1	2219	tags=20%, list=11%, signal=23%
REACTOME_CHAPERONE_MEDIATED_AUTOPHAGY	REACTOME_CHAPERONE_MEDIATED_AUTOPHAGY		19	0.227377	0.738606	0.851986	0.955891	1	3447	tags=26%, list=18%, signal=32%
REACTOME_NOTCH3_ACTIVATION_AND_TRANSMISSION_OF_SIGNAL_TO_THE_NUCLEUS	REACTOME_NOTCH3_ACTIVATION_AND_TRANSMISSION_OF_SIGNAL_TO_THE_NUCLEUS		24	0.210623	0.738026	0.869565	0.95417	1	1578	tags=13%, list=8%, signal=14%
REACTOME_NEUREXINS_AND_NEUROLIGINS	REACTOME_NEUREXINS_AND_NEUROLIGINS		43	0.180017	0.731675	0.961538	0.958536	1	5519	tags=33%, list=28%, signal=45%
REACTOME_KERATAN_SULFATE_KERATIN_METABOLISM	REACTOME_KERATAN_SULFATE_KERATIN_METABOLISM		29	0.193982	0.729404	0.904215	0.958657	1	5021	tags=34%, list=26%, signal=46%
REACTOME_DISEASES_ASSOCIATED_WITH_O_GLYCOSYLATION_OF_PROTEINS	REACTOME_DISEASES_ASSOCIATED_WITH_O_GLYCOSYLATION_OF_PROTEINS		48	0.168859	0.727289	0.95045	0.958565	1	3411	tags=21%, list=17%, signal=25%
REACTOME_RAS_ACTIVATION_UPON_CA2_INFLUX_THROUGH_NMDA_RECEPTOR	REACTOME_RAS_ACTIVATION_UPON_CA2_INFLUX_THROUGH_NMDA_RECEPTOR		18	0.216923	0.724639	0.847458	0.958659	1	5364	tags=39%, list=27%, signal=53%
REACTOME_REGULATION_OF_FZD_BY_UBIQUITINATION	REACTOME_REGULATION_OF_FZD_BY_UBIQUITINATION		18	0.214911	0.714394	0.874564	0.965564	1	15444	tags=100%, list=79%, signal=465%
REACTOME_AFLATOXIN_ACTIVATION_AND_DETOXIFICATION	REACTOME_AFLATOXIN_ACTIVATION_AND_DETOXIFICATION		16	0.22852	0.714029	0.86076	0.963626	1	3256	tags=25%, list=17%, signal=30%
REACTOME_PROTEIN_PROTEIN_INTERACTIONS_AT_SYNAPSES	REACTOME_PROTEIN_PROTEIN_INTERACTIONS_AT_SYNAPSES		66	0.154227	0.702755	0.959538	0.970823	1	5519	tags=29%, list=28%, signal=40%
REACTOME_FORMATION_OF_THE_CORNIFIED_ENVELOPE	REACTOME_FORMATION_OF_THE_CORNIFIED_ENVELOPE		39	0.171941	0.698698	0.941423	0.971667	1	3132	tags=18%, list=16%, signal=21%
REACTOME_VOLTAGE_GATED_POTASSIUM_CHANNELS	REACTOME_VOLTAGE_GATED_POTASSIUM_CHANNELS		25	0.190604	0.69541	0.897541	0.971949	1	4577	tags=28%, list=23%, signal=36%
REACTOME_ENDOGENOUS_STEROLS	REACTOME_ENDOGENOUS_STEROLS		21	0.197437	0.680486	0.920139	0.980342	1	3212	tags=24%, list=16%, signal=28%
REACTOME_KERATINIZATION	REACTOME_KERATINIZATION		40	0.164415	0.667633	0.958974	0.986045	1	3132	tags=18%, list=16%, signal=21%
REACTOME_AQUAPORIN_MEDIATED_TRANSPORT	REACTOME_AQUAPORIN_MEDIATED_TRANSPORT		35	0.165919	0.660065	0.972477	0.987952	1	5607	tags=40%, list=29%, signal=56%
KEGG_SPHINGOLIPID_METABOLISM	KEGG_SPHINGOLIPID_METABOLISM		35	0.16421	0.650792	0.983264	0.990481	1	4042	tags=26%, list=21%, signal=32%
REACTOME_ASSEMBLY_AND_CELL_SURFACE_PRESENTATION_OF_NMDA_RECEPTORS	REACTOME_ASSEMBLY_AND_CELL_SURFACE_PRESENTATION_OF_NMDA_RECEPTORS		34	0.16217	0.648311	0.974249	0.98933	1	5699	tags=32%, list=29%, signal=45%
REACTOME_PHASE_0_RAPID_DEPOLARISATION	REACTOME_PHASE_0_RAPID_DEPOLARISATION		25	0.175038	0.641789	0.958015	0.990053	1	5164	tags=32%, list=26%, signal=43%
REACTOME_VEGFR2_MEDIATED_CELL_PROLIFERATION	REACTOME_VEGFR2_MEDIATED_CELL_PROLIFERATION		19	0.193973	0.634455	0.960784	0.990875	1	4896	tags=32%, list=25%, signal=42%
REACTOME_ACTIVATION_OF_MATRIX_METALLOPROTEINASES	REACTOME_ACTIVATION_OF_MATRIX_METALLOPROTEINASES		23	0.175971	0.633163	0.952756	0.989124	1	1703	tags=13%, list=9%, signal=14%
REACTOME_CYTOCHROME_P450_ARRANGED_BY_SUBSTRATE_TYPE	REACTOME_CYTOCHROME_P450_ARRANGED_BY_SUBSTRATE_TYPE		37	0.155856	0.612117	0.987069	0.994714	1	3212	tags=19%, list=16%, signal=23%
REACTOME_BETA_CATENIN_PHOSPHORYLATION_CASCADE	REACTOME_BETA_CATENIN_PHOSPHORYLATION_CASCADE		17	0.18628	0.603983	0.948276	0.995026	1	2378	tags=18%, list=12%, signal=20%
REACTOME_CREB1_PHOSPHORYLATION_THROUGH_NMDA_RECEPTOR_MEDIATED_ACTIVATION_OF_RAS_SIGNALING	REACTOME_CREB1_PHOSPHORYLATION_THROUGH_NMDA_RECEPTOR_MEDIATED_ACTIVATION_OF_RAS_SIGNALING		26	0.165464	0.601585	0.985714	0.993451	1	5364	tags=38%, list=27%, signal=53%
KEGG_CARDIAC_MUSCLE_CONTRACTION	KEGG_CARDIAC_MUSCLE_CONTRACTION		58	0.130608	0.597265	1	0.99241	1	2822	tags=12%, list=14%, signal=14%
REACTOME_VASOPRESSIN_REGULATES_RENAL_WATER_HOMEOSTASIS_VIA_AQUAPORINS	REACTOME_VASOPRESSIN_REGULATES_RENAL_WATER_HOMEOSTASIS_VIA_AQUAPORINS		33	0.149867	0.587202	0.991416	0.992547	1	4642	tags=30%, list=24%, signal=40%
REACTOME_NEGATIVE_REGULATION_OF_NMDA_RECEPTOR_MEDIATED_NEURONAL_TRANSMISSION	REACTOME_NEGATIVE_REGULATION_OF_NMDA_RECEPTOR_MEDIATED_NEURONAL_TRANSMISSION		19	0.172906	0.577599	0.992883	0.992495	1	5519	tags=32%, list=28%, signal=44%
REACTOME_FORMATION_OF_FIBRIN_CLOT_CLOTTING_CASCADE	REACTOME_FORMATION_OF_FIBRIN_CLOT_CLOTTING_CASCADE		25	0.158188	0.569643	0.993333	0.991888	1	3944	tags=20%, list=20%, signal=25%
REACTOME_EGR2_AND_SOX10_MEDIATED_INITIATION_OF_SCHWANN_CELL_MYELINATION	REACTOME_EGR2_AND_SOX10_MEDIATED_INITIATION_OF_SCHWANN_CELL_MYELINATION		23	0.140607	0.497921	1	0.997762	1	6300	tags=43%, list=32%, signal=64%

## Sheet: Table S3
Supplementary Table 3. Functional enrichment of RRMM patients with CRBN del10 vs WT CRBN patients in MM-010 cohort
NAME	GS<br> follow link to MSigDB	GS DETAILS	SIZE	ES	NES	NOM p-val	FDR q-val	FWER p-val	RANK AT MAX	LEADING EDGE
HALLMARK_TNFA_SIGNALING_VIA_NFKB	HALLMARK_TNFA_SIGNALING_VIA_NFKB	Details ...	199	0.69702	3.31537	0	0	0	3852	tags=65%, list=16%, signal=78%
HALLMARK_INFLAMMATORY_RESPONSE	HALLMARK_INFLAMMATORY_RESPONSE	Details ...	192	0.61822	2.95602	0	0	0	3960	tags=49%, list=17%, signal=59%
REACTOME_INTERLEUKIN_10_SIGNALING	REACTOME_INTERLEUKIN_10_SIGNALING	Details ...	45	0.681501	2.48176	0	0	0	4815	tags=69%, list=21%, signal=87%
HALLMARK_IL6_JAK_STAT3_SIGNALING	HALLMARK_IL6_JAK_STAT3_SIGNALING	Details ...	85	0.57839	2.44945	0	0	0	4686	tags=51%, list=20%, signal=63%
REACTOME_SIGNALING_BY_CSF3_G_CSF	REACTOME_SIGNALING_BY_CSF3_G_CSF	Details ...	28	0.715314	2.39187	0	0	0	3164	tags=57%, list=14%, signal=66%
HALLMARK_COMPLEMENT	HALLMARK_COMPLEMENT	Details ...	190	0.481469	2.29223	0	0	0	4420	tags=41%, list=19%, signal=50%
KEGG_GRAFT_VERSUS_HOST_DISEASE	KEGG_GRAFT_VERSUS_HOST_DISEASE	Details ...	36	0.633179	2.26281	0	0	0	5161	tags=64%, list=22%, signal=82%
REACTOME_SIGNALLING_TO_ERKS	REACTOME_SIGNALLING_TO_ERKS	Details ...	32	0.652564	2.24653	0	0	0	4042	tags=53%, list=17%, signal=64%
HALLMARK_IL2_STAT5_SIGNALING	HALLMARK_IL2_STAT5_SIGNALING	Details ...	193	0.468039	2.24483	0	0	0	4883	tags=43%, list=21%, signal=54%
KEGG_CYTOKINE_CYTOKINE_RECEPTOR_INTERACTION	KEGG_CYTOKINE_CYTOKINE_RECEPTOR_INTERACTION	Details ...	216	0.461965	2.23925	0	0	0	4834	tags=34%, list=21%, signal=43%
HALLMARK_APOPTOSIS	HALLMARK_APOPTOSIS	Details ...	158	0.478779	2.22494	0	0.000124	0.001	4040	tags=39%, list=17%, signal=47%
REACTOME_INACTIVATION_OF_CSF3_G_CSF_SIGNALING	REACTOME_INACTIVATION_OF_CSF3_G_CSF_SIGNALING	Details ...	23	0.703236	2.19233	0	0.000331	0.003	3164	tags=57%, list=14%, signal=65%
REACTOME_SIGNALING_BY_INTERLEUKINS	REACTOME_SIGNALING_BY_INTERLEUKINS	Details ...	423	0.420085	2.17947	0	0.00041	0.004	3558	tags=31%, list=15%, signal=36%
HALLMARK_HYPOXIA	HALLMARK_HYPOXIA	Details ...	185	0.464233	2.17714	0	0.000381	0.004	4975	tags=45%, list=21%, signal=57%
HALLMARK_EPITHELIAL_MESENCHYMAL_TRANSITION	HALLMARK_EPITHELIAL_MESENCHYMAL_TRANSITION	Details ...	195	0.452652	2.15589	0	0.000804	0.009	7001	tags=53%, list=30%, signal=75%
REACTOME_INTERLEUKIN_4_AND_INTERLEUKIN_13_SIGNALING	REACTOME_INTERLEUKIN_4_AND_INTERLEUKIN_13_SIGNALING	Details ...	106	0.483896	2.1548	0	0.000754	0.009	4073	tags=40%, list=17%, signal=48%
KEGG_NOD_LIKE_RECEPTOR_SIGNALING_PATHWAY	KEGG_NOD_LIKE_RECEPTOR_SIGNALING_PATHWAY	Details ...	58	0.544874	2.14111	0	0.000941	0.012	3945	tags=48%, list=17%, signal=58%
HALLMARK_TGF_BETA_SIGNALING	HALLMARK_TGF_BETA_SIGNALING	Details ...	53	0.544967	2.13294	0	0.00110797	0.015	3838	tags=47%, list=16%, signal=56%
HALLMARK_KRAS_SIGNALING_UP	HALLMARK_KRAS_SIGNALING_UP	Details ...	189	0.448763	2.12982	0	0.00126224	0.018	6563	tags=49%, list=28%, signal=68%
REACTOME_SIGNALING_BY_FGFR1_IN_DISEASE	REACTOME_SIGNALING_BY_FGFR1_IN_DISEASE	Details ...	32	0.611672	2.12144	0	0.00126627	0.019	2665	tags=44%, list=11%, signal=49%
REACTOME_SIGNALING_BY_ERYTHROPOIETIN	REACTOME_SIGNALING_BY_ERYTHROPOIETIN		24	0.664566	2.1167	0	0.00120597	0.019	2790	tags=54%, list=12%, signal=61%
REACTOME_SIGNALING_BY_FGFR4	REACTOME_SIGNALING_BY_FGFR4		35	0.590377	2.10339	0	0.00144569	0.024	3164	tags=40%, list=14%, signal=46%
KEGG_CHEMOKINE_SIGNALING_PATHWAY	KEGG_CHEMOKINE_SIGNALING_PATHWAY		170	0.451509	2.1033	0	0.00138283	0.024	4150	tags=36%, list=18%, signal=43%
KEGG_JAK_STAT_SIGNALING_PATHWAY	KEGG_JAK_STAT_SIGNALING_PATHWAY		120	0.474835	2.09505	0	0.00144026	0.026	2951	tags=30%, list=13%, signal=34%
KEGG_VIRAL_MYOCARDITIS	KEGG_VIRAL_MYOCARDITIS		67	0.520943	2.09237	0	0.00138265	0.026	4855	tags=48%, list=21%, signal=60%
REACTOME_FLT3_SIGNALING	REACTOME_FLT3_SIGNALING		38	0.588762	2.09045	0	0.0014347	0.028	4970	tags=55%, list=21%, signal=70%
KEGG_AUTOIMMUNE_THYROID_DISEASE	KEGG_AUTOIMMUNE_THYROID_DISEASE		33	0.594053	2.07421	0	0.00211035	0.043	5066	tags=58%, list=22%, signal=73%
REACTOME_RHO_GTPASES_ACTIVATE_CIT	REACTOME_RHO_GTPASES_ACTIVATE_CIT		19	0.694939	2.0693	0	0.00222259	0.046	6061	tags=79%, list=26%, signal=106%
REACTOME_CHEMOKINE_RECEPTORS_BIND_CHEMOKINES	REACTOME_CHEMOKINE_RECEPTORS_BIND_CHEMOKINES		50	0.542951	2.06429	0	0.00214595	0.046	7211	tags=62%, list=31%, signal=89%
REACTOME_CIRCADIAN_CLOCK	REACTOME_CIRCADIAN_CLOCK		68	0.51502	2.06349	0	0.00207442	0.046	5015	tags=53%, list=21%, signal=67%
KEGG_NEUROTROPHIN_SIGNALING_PATHWAY	KEGG_NEUROTROPHIN_SIGNALING_PATHWAY		122	0.46833	2.05079	0	0.00230401	0.053	2790	tags=34%, list=12%, signal=38%
KEGG_NATURAL_KILLER_CELL_MEDIATED_CYTOTOXICITY	KEGG_NATURAL_KILLER_CELL_MEDIATED_CYTOTOXICITY		111	0.466974	2.04921	0	0.00235267	0.056	5001	tags=41%, list=21%, signal=51%
REACTOME_STRIATED_MUSCLE_CONTRACTION	REACTOME_STRIATED_MUSCLE_CONTRACTION		32	0.589604	2.03263	0	0.00256287	0.062	5542	tags=53%, list=24%, signal=70%
REACTOME_NEUTROPHIL_DEGRANULATION	REACTOME_NEUTROPHIL_DEGRANULATION		462	0.389055	2.02133	0	0.00299669	0.074	4915	tags=39%, list=21%, signal=48%
REACTOME_CD209_DC_SIGN_SIGNALING	REACTOME_CD209_DC_SIGN_SIGNALING		20	0.661499	2.0198	0.00210526	0.00298852	0.075	2761	tags=50%, list=12%, signal=57%
HALLMARK_HEME_METABOLISM	HALLMARK_HEME_METABOLISM		192	0.420895	2.01673	0	0.00308634	0.08	5494	tags=46%, list=23%, signal=60%
KEGG_DORSO_VENTRAL_AXIS_FORMATION	KEGG_DORSO_VENTRAL_AXIS_FORMATION		23	0.624978	2.01197	0	0.00321632	0.086	5685	tags=52%, list=24%, signal=69%
REACTOME_EGFR_DOWNREGULATION	REACTOME_EGFR_DOWNREGULATION		29	0.595859	2.00706	0	0.00338237	0.09	3164	tags=41%, list=14%, signal=48%
KEGG_ALLOGRAFT_REJECTION	KEGG_ALLOGRAFT_REJECTION		32	0.593496	2.00635	0	0.00329564	0.09	4707	tags=53%, list=20%, signal=66%
REACTOME_SIGNALING_BY_FGFR3	REACTOME_SIGNALING_BY_FGFR3		36	0.565253	2.00541	0	0.00321325	0.09	3164	tags=36%, list=14%, signal=42%
REACTOME_SIGNALING_BY_FLT3_FUSION_PROTEINS	REACTOME_SIGNALING_BY_FLT3_FUSION_PROTEINS		19	0.658341	1.99806	0	0.00342504	0.099	2665	tags=53%, list=11%, signal=59%
REACTOME_FGFR1_MUTANT_RECEPTOR_ACTIVATION	REACTOME_FGFR1_MUTANT_RECEPTOR_ACTIVATION		25	0.614064	1.97774	0	0.00440611	0.128	2665	tags=44%, list=11%, signal=50%
KEGG_ACUTE_MYELOID_LEUKEMIA	KEGG_ACUTE_MYELOID_LEUKEMIA		57	0.498229	1.96216	0	0.00521906	0.155	3235	tags=39%, list=14%, signal=45%
REACTOME_HDMS_DEMETHYLATE_HISTONES	REACTOME_HDMS_DEMETHYLATE_HISTONES		22	0.610581	1.95562	0.00215054	0.00569594	0.173	3093	tags=55%, list=13%, signal=63%
REACTOME_ASSEMBLY_OF_THE_HIV_VIRION	REACTOME_ASSEMBLY_OF_THE_HIV_VIRION		16	0.670024	1.95481	0.00200401	0.00559786	0.174	4091	tags=44%, list=17%, signal=53%
REACTOME_OVARIAN_TUMOR_DOMAIN_PROTEASES	REACTOME_OVARIAN_TUMOR_DOMAIN_PROTEASES		38	0.537866	1.95163	0	0.00579104	0.18	4005	tags=53%, list=17%, signal=63%
REACTOME_GASTRIN_CREB_SIGNALLING_PATHWAY_VIA_PKC_AND_MAPK	REACTOME_GASTRIN_CREB_SIGNALLING_PATHWAY_VIA_PKC_AND_MAPK		16	0.690387	1.95055	0	0.00585982	0.183	2405	tags=50%, list=10%, signal=56%
REACTOME_LISTERIA_MONOCYTOGENES_ENTRY_INTO_HOST_CELLS	REACTOME_LISTERIA_MONOCYTOGENES_ENTRY_INTO_HOST_CELLS		19	0.646748	1.94657	0.0020284	0.00606768	0.194	3386	tags=47%, list=14%, signal=55%
REACTOME_CLASS_A_1_RHODOPSIN_LIKE_RECEPTORS	REACTOME_CLASS_A_1_RHODOPSIN_LIKE_RECEPTORS		215	0.399154	1.94527	0	0.00594385	0.194	5042	tags=33%, list=22%, signal=41%
REACTOME_NEGATIVE_REGULATION_OF_FGFR4_SIGNALING	REACTOME_NEGATIVE_REGULATION_OF_FGFR4_SIGNALING		25	0.597919	1.94439	0.00422833	0.00593061	0.198	3164	tags=40%, list=14%, signal=46%
REACTOME_INTERLEUKIN_3_INTERLEUKIN_5_AND_GM_CSF_SIGNALING	REACTOME_INTERLEUKIN_3_INTERLEUKIN_5_AND_GM_CSF_SIGNALING		45	0.520366	1.94437	0	0.00581433	0.198	3164	tags=40%, list=14%, signal=46%
REACTOME_SIGNALING_BY_ERBB2	REACTOME_SIGNALING_BY_ERBB2		49	0.512017	1.94182	0	0.00585379	0.203	4856	tags=47%, list=21%, signal=59%
REACTOME_RHO_GTPASES_ACTIVATE_PAKS	REACTOME_RHO_GTPASES_ACTIVATE_PAKS		21	0.619649	1.94163	0	0.00574334	0.203	4027	tags=57%, list=17%, signal=69%
REACTOME_SIGNALING_BY_EGFR	REACTOME_SIGNALING_BY_EGFR		48	0.517092	1.93843	0.002079	0.00602391	0.215	3527	tags=42%, list=15%, signal=49%
REACTOME_FLT3_SIGNALING_IN_DISEASE	REACTOME_FLT3_SIGNALING_IN_DISEASE		28	0.589465	1.93732	0	0.00603622	0.22	3164	tags=43%, list=14%, signal=50%
REACTOME_SIGNALING_BY_FLT3_ITD_AND_TKD_MUTANTS	REACTOME_SIGNALING_BY_FLT3_ITD_AND_TKD_MUTANTS		16	0.659184	1.93083	0	0.00638053	0.233	2665	tags=50%, list=11%, signal=56%
KEGG_T_CELL_RECEPTOR_SIGNALING_PATHWAY	KEGG_T_CELL_RECEPTOR_SIGNALING_PATHWAY		101	0.444306	1.91956	0	0.00702937	0.256	2790	tags=30%, list=12%, signal=34%
REACTOME_SIGNALLING_TO_RAS	REACTOME_SIGNALLING_TO_RAS		19	0.650467	1.91549	0	0.00727018	0.27	3741	tags=47%, list=16%, signal=56%
REACTOME_DOWNREGULATION_OF_TGF_BETA_RECEPTOR_SIGNALING	REACTOME_DOWNREGULATION_OF_TGF_BETA_RECEPTOR_SIGNALING		26	0.591975	1.91281	0	0.00737043	0.28	3764	tags=58%, list=16%, signal=69%
HALLMARK_CHOLESTEROL_HOMEOSTASIS	HALLMARK_CHOLESTEROL_HOMEOSTASIS		72	0.466845	1.90645	0	0.00792512	0.298	2617	tags=28%, list=11%, signal=31%
HALLMARK_P53_PATHWAY	HALLMARK_P53_PATHWAY		191	0.396991	1.90591	0	0.00781633	0.299	4382	tags=34%, list=19%, signal=41%
REACTOME_SMOOTH_MUSCLE_CONTRACTION	REACTOME_SMOOTH_MUSCLE_CONTRACTION		31	0.560785	1.90148	0	0.00815904	0.315	4115	tags=45%, list=18%, signal=55%
REACTOME_COLLAGEN_DEGRADATION	REACTOME_COLLAGEN_DEGRADATION		61	0.474082	1.90097	0	0.00811237	0.318	7189	tags=59%, list=31%, signal=85%
KEGG_TYPE_I_DIABETES_MELLITUS	KEGG_TYPE_I_DIABETES_MELLITUS		39	0.522296	1.90024	0	0.00802588	0.32	5161	tags=49%, list=22%, signal=62%
HALLMARK_ESTROGEN_RESPONSE_EARLY	HALLMARK_ESTROGEN_RESPONSE_EARLY		190	0.395499	1.8953	0	0.00842485	0.342	6590	tags=44%, list=28%, signal=61%
KEGG_PROSTATE_CANCER	KEGG_PROSTATE_CANCER		87	0.455455	1.89278	0	0.008479	0.349	4768	tags=44%, list=20%, signal=55%
KEGG_B_CELL_RECEPTOR_SIGNALING_PATHWAY	KEGG_B_CELL_RECEPTOR_SIGNALING_PATHWAY		73	0.470497	1.89267	0	0.00837169	0.35	2844	tags=34%, list=12%, signal=39%
KEGG_LEISHMANIA_INFECTION	KEGG_LEISHMANIA_INFECTION		69	0.464711	1.88651	0	0.00903664	0.379	3910	tags=43%, list=17%, signal=52%
KEGG_INSULIN_SIGNALING_PATHWAY	KEGG_INSULIN_SIGNALING_PATHWAY		125	0.417257	1.8864	0	0.0089445	0.38	4213	tags=35%, list=18%, signal=43%
REACTOME_TGF_BETA_RECEPTOR_SIGNALING_ACTIVATES_SMADS	REACTOME_TGF_BETA_RECEPTOR_SIGNALING_ACTIVATES_SMADS		32	0.551029	1.88558	0.00210084	0.00892741	0.383	3764	tags=50%, list=16%, signal=60%
REACTOME_SPRY_REGULATION_OF_FGF_SIGNALING	REACTOME_SPRY_REGULATION_OF_FGF_SIGNALING		16	0.653973	1.88522	0.00201613	0.0088389	0.384	3164	tags=50%, list=14%, signal=58%
REACTOME_RHO_GTPASES_ACTIVATE_ROCKS	REACTOME_RHO_GTPASES_ACTIVATE_ROCKS		19	0.623833	1.8835	0.00408998	0.00893105	0.388	4411	tags=63%, list=19%, signal=78%
HALLMARK_COAGULATION	HALLMARK_COAGULATION		112	0.425865	1.87946	0	0.00914936	0.403	4935	tags=38%, list=21%, signal=47%
REACTOME_SIGNALING_BY_MET	REACTOME_SIGNALING_BY_MET		76	0.45355	1.8762	0	0.00934788	0.413	5006	tags=42%, list=21%, signal=53%
REACTOME_RHOF_GTPASE_CYCLE	REACTOME_RHOF_GTPASE_CYCLE		42	0.517548	1.87564	0	0.00927415	0.414	4244	tags=40%, list=18%, signal=49%
REACTOME_NEGATIVE_REGULATION_OF_FGFR1_SIGNALING	REACTOME_NEGATIVE_REGULATION_OF_FGFR1_SIGNALING		26	0.56911	1.87096	0.00201207	0.00951704	0.426	3164	tags=38%, list=14%, signal=44%
REACTOME_SUMOYLATION_OF_INTRACELLULAR_RECEPTORS	REACTOME_SUMOYLATION_OF_INTRACELLULAR_RECEPTORS		29	0.547928	1.86752	0	0.00987634	0.437	2496	tags=34%, list=11%, signal=39%
KEGG_INTESTINAL_IMMUNE_NETWORK_FOR_IGA_PRODUCTION	KEGG_INTESTINAL_IMMUNE_NETWORK_FOR_IGA_PRODUCTION		40	0.516186	1.86717	0	0.00978265	0.439	4707	tags=48%, list=20%, signal=59%
REACTOME_EPHA_MEDIATED_GROWTH_CONE_COLLAPSE	REACTOME_EPHA_MEDIATED_GROWTH_CONE_COLLAPSE		28	0.559868	1.86318	0	0.00997231	0.448	4376	tags=46%, list=19%, signal=57%
KEGG_RENAL_CELL_CARCINOMA	KEGG_RENAL_CELL_CARCINOMA		66	0.468016	1.86091	0	0.0100284	0.453	2790	tags=32%, list=12%, signal=36%
REACTOME_TAK1_ACTIVATES_NFKB_BY_PHOSPHORYLATION_AND_ACTIVATION_OF_IKKS_COMPLEX	REACTOME_TAK1_ACTIVATES_NFKB_BY_PHOSPHORYLATION_AND_ACTIVATION_OF_IKKS_COMPLEX		31	0.543641	1.85889	0.00204918	0.0101495	0.458	3164	tags=45%, list=14%, signal=52%
REACTOME_SIGNALING_BY_EGFR_IN_CANCER	REACTOME_SIGNALING_BY_EGFR_IN_CANCER		24	0.574742	1.85503	0.00208333	0.0105099	0.478	3843	tags=42%, list=16%, signal=50%
REACTOME_INTERLEUKIN_1_FAMILY_SIGNALING	REACTOME_INTERLEUKIN_1_FAMILY_SIGNALING		133	0.408784	1.85337	0	0.0104796	0.481	3164	tags=28%, list=14%, signal=32%
REACTOME_SIGNALING_BY_TGF_BETA_RECEPTOR_COMPLEX	REACTOME_SIGNALING_BY_TGF_BETA_RECEPTOR_COMPLEX		72	0.452353	1.85304	0.00209644	0.0103855	0.483	3764	tags=38%, list=16%, signal=45%
REACTOME_SIGNALING_BY_FGFR1	REACTOME_SIGNALING_BY_FGFR1		43	0.503757	1.85177	0.0021322	0.0104325	0.488	3164	tags=33%, list=14%, signal=38%
REACTOME_THROMBIN_SIGNALLING_THROUGH_PROTEINASE_ACTIVATED_RECEPTORS_PARS	REACTOME_THROMBIN_SIGNALLING_THROUGH_PROTEINASE_ACTIVATED_RECEPTORS_PARS		27	0.563926	1.84896	0.00199601	0.0106171	0.498	3645	tags=41%, list=16%, signal=48%
REACTOME_SIGNALING_BY_CYTOSOLIC_FGFR1_FUSION_MUTANTS	REACTOME_SIGNALING_BY_CYTOSOLIC_FGFR1_FUSION_MUTANTS		17	0.64356	1.84731	0.0021097	0.0106602	0.503	2665	tags=53%, list=11%, signal=60%
REACTOME_NEGATIVE_REGULATION_OF_FGFR3_SIGNALING	REACTOME_NEGATIVE_REGULATION_OF_FGFR3_SIGNALING		25	0.570456	1.84182	0	0.0113295	0.53	3164	tags=36%, list=14%, signal=42%
REACTOME_SIGNALING_BY_SCF_KIT	REACTOME_SIGNALING_BY_SCF_KIT		42	0.5053	1.83961	0	0.0114371	0.535	2665	tags=36%, list=11%, signal=40%
REACTOME_GPVI_MEDIATED_ACTIVATION_CASCADE	REACTOME_GPVI_MEDIATED_ACTIVATION_CASCADE		34	0.524188	1.83579	0	0.0117337	0.546	2665	tags=32%, list=11%, signal=36%
REACTOME_UPTAKE_AND_ACTIONS_OF_BACTERIAL_TOXINS	REACTOME_UPTAKE_AND_ACTIONS_OF_BACTERIAL_TOXINS		28	0.546252	1.83573	0.00443459	0.0116338	0.547	5519	tags=50%, list=24%, signal=65%
REACTOME_RHO_GTPASES_ACTIVATE_PKNS	REACTOME_RHO_GTPASES_ACTIVATE_PKNS		33	0.532797	1.82548	0.00438597	0.0128973	0.591	4411	tags=52%, list=19%, signal=63%
REACTOME_GAP_JUNCTION_ASSEMBLY	REACTOME_GAP_JUNCTION_ASSEMBLY		23	0.57777	1.82052	0.00203666	0.0135676	0.613	3289	tags=39%, list=14%, signal=45%
REACTOME_TGF_BETA_RECEPTOR_SIGNALING_IN_EMT_EPITHELIAL_TO_MESENCHYMAL_TRANSITION	REACTOME_TGF_BETA_RECEPTOR_SIGNALING_IN_EMT_EPITHELIAL_TO_MESENCHYMAL_TRANSITION		16	0.636569	1.82	0.00211864	0.0134789	0.616	3371	tags=44%, list=14%, signal=51%
HALLMARK_ALLOGRAFT_REJECTION	HALLMARK_ALLOGRAFT_REJECTION		188	0.38562	1.817	0	0.0136657	0.624	5302	tags=37%, list=23%, signal=47%
KEGG_HEMATOPOIETIC_CELL_LINEAGE	KEGG_HEMATOPOIETIC_CELL_LINEAGE		80	0.441812	1.81665	0.00197628	0.0135932	0.625	5294	tags=43%, list=23%, signal=55%
REACTOME_CONSTITUTIVE_SIGNALING_BY_LIGAND_RESPONSIVE_EGFR_CANCER_VARIANTS	REACTOME_CONSTITUTIVE_SIGNALING_BY_LIGAND_RESPONSIVE_EGFR_CANCER_VARIANTS		19	0.602402	1.81448	0.00636943	0.0137241	0.632	4856	tags=47%, list=21%, signal=60%
KEGG_ASTHMA	KEGG_ASTHMA		23	0.579817	1.81109	0.00412371	0.0141363	0.652	4915	tags=61%, list=21%, signal=77%
REACTOME_SIGNALING_BY_TGFB_FAMILY_MEMBERS	REACTOME_SIGNALING_BY_TGFB_FAMILY_MEMBERS		94	0.422594	1.81109	0	0.0139935	0.652	3764	tags=34%, list=16%, signal=40%
REACTOME_SIGNALING_BY_ERBB4	REACTOME_SIGNALING_BY_ERBB4		57	0.467581	1.80921	0	0.0140253	0.655	6162	tags=47%, list=26%, signal=64%
REACTOME_MYD88_INDEPENDENT_TLR4_CASCADE	REACTOME_MYD88_INDEPENDENT_TLR4_CASCADE		96	0.426243	1.80917	0	0.0138864	0.655	3582	tags=36%, list=15%, signal=43%
REACTOME_NEGATIVE_REGULATION_OF_MAPK_PATHWAY	REACTOME_NEGATIVE_REGULATION_OF_MAPK_PATHWAY		42	0.487564	1.80908	0.00677201	0.0137635	0.656	3164	tags=33%, list=14%, signal=38%
REACTOME_NEGATIVE_REGULATION_OF_MET_ACTIVITY	REACTOME_NEGATIVE_REGULATION_OF_MET_ACTIVITY		20	0.596244	1.80861	0.0019802	0.0136805	0.657	3386	tags=45%, list=14%, signal=53%
REACTOME_RHO_GTPASES_ACTIVATE_IQGAPS	REACTOME_RHO_GTPASES_ACTIVATE_IQGAPS		27	0.550774	1.80835	0.00619835	0.0135747	0.657	3903	tags=44%, list=17%, signal=53%
REACTOME_INTERLEUKIN_6_FAMILY_SIGNALING	REACTOME_INTERLEUKIN_6_FAMILY_SIGNALING		22	0.576266	1.80477	0.00211864	0.0139941	0.67	2951	tags=50%, list=13%, signal=57%
REACTOME_DEGRADATION_OF_THE_EXTRACELLULAR_MATRIX	REACTOME_DEGRADATION_OF_THE_EXTRACELLULAR_MATRIX		129	0.397388	1.80162	0	0.014158	0.676	7443	tags=53%, list=32%, signal=77%
REACTOME_INTERLEUKIN_1_SIGNALING	REACTOME_INTERLEUKIN_1_SIGNALING		99	0.418295	1.79933	0	0.0143083	0.683	1844	tags=24%, list=8%, signal=26%
REACTOME_ASSEMBLY_OF_COLLAGEN_FIBRILS_AND_OTHER_MULTIMERIC_STRUCTURES	REACTOME_ASSEMBLY_OF_COLLAGEN_FIBRILS_AND_OTHER_MULTIMERIC_STRUCTURES		59	0.463936	1.79598	0	0.0147475	0.694	7189	tags=51%, list=31%, signal=73%
HALLMARK_MYOGENESIS	HALLMARK_MYOGENESIS		181	0.373272	1.79575	0	0.0146599	0.695	4072	tags=29%, list=17%, signal=35%
REACTOME_DAP12_INTERACTIONS	REACTOME_DAP12_INTERACTIONS		38	0.502414	1.79325	0.00203666	0.0148156	0.703	4670	tags=47%, list=20%, signal=59%
REACTOME_ACTIVATED_TAK1_MEDIATES_P38_MAPK_ACTIVATION	REACTOME_ACTIVATED_TAK1_MEDIATES_P38_MAPK_ACTIVATION		23	0.557603	1.78735	0.00992064	0.0154962	0.724	3523	tags=48%, list=15%, signal=56%
KEGG_FOCAL_ADHESION	KEGG_FOCAL_ADHESION		192	0.370658	1.78264	0	0.0160711	0.743	6160	tags=41%, list=26%, signal=55%
KEGG_GAP_JUNCTION	KEGG_GAP_JUNCTION		78	0.428852	1.77966	0	0.016346	0.748	2761	tags=27%, list=12%, signal=30%
REACTOME_RORA_ACTIVATES_GENE_EXPRESSION	REACTOME_RORA_ACTIVATES_GENE_EXPRESSION		18	0.601571	1.77615	0.00632911	0.0168496	0.762	5946	tags=56%, list=25%, signal=74%
REACTOME_TNF_RECEPTOR_SUPERFAMILY_TNFSF_MEMBERS_MEDIATING_NON_CANONICAL_NF_KB_PATHWAY	REACTOME_TNF_RECEPTOR_SUPERFAMILY_TNFSF_MEMBERS_MEDIATING_NON_CANONICAL_NF_KB_PATHWAY		17	0.601103	1.77603	0.00421053	0.0167262	0.762	4780	tags=41%, list=20%, signal=52%
REACTOME_DOWNREGULATION_OF_SMAD2_3_SMAD4_TRANSCRIPTIONAL_ACTIVITY	REACTOME_DOWNREGULATION_OF_SMAD2_3_SMAD4_TRANSCRIPTIONAL_ACTIVITY		23	0.560115	1.77264	0.0130719	0.0170254	0.772	3600	tags=48%, list=15%, signal=56%
REACTOME_REGULATION_OF_SIGNALING_BY_CBL	REACTOME_REGULATION_OF_SIGNALING_BY_CBL		22	0.574269	1.77182	0.0102669	0.0170045	0.775	3164	tags=45%, list=14%, signal=53%
REACTOME_INTERLEUKIN_12_FAMILY_SIGNALING	REACTOME_INTERLEUKIN_12_FAMILY_SIGNALING		56	0.455803	1.76891	0	0.0173436	0.784	2977	tags=32%, list=13%, signal=37%
KEGG_PATHOGENIC_ESCHERICHIA_COLI_INFECTION	KEGG_PATHOGENIC_ESCHERICHIA_COLI_INFECTION		51	0.465153	1.76836	0	0.0172432	0.787	2649	tags=31%, list=11%, signal=35%
KEGG_ADHERENS_JUNCTION	KEGG_ADHERENS_JUNCTION		68	0.440647	1.76781	0	0.01721	0.791	4482	tags=38%, list=19%, signal=47%
KEGG_LEUKOCYTE_TRANSENDOTHELIAL_MIGRATION	KEGG_LEUKOCYTE_TRANSENDOTHELIAL_MIGRATION		102	0.408594	1.76521	0	0.0175227	0.801	4042	tags=34%, list=17%, signal=41%
REACTOME_TRANSPORT_OF_CONNEXONS_TO_THE_PLASMA_MEMBRANE	REACTOME_TRANSPORT_OF_CONNEXONS_TO_THE_PLASMA_MEMBRANE		16	0.622442	1.76312	0.00604839	0.0177022	0.807	6273	tags=69%, list=27%, signal=94%
REACTOME_RAC1_GTPASE_CYCLE	REACTOME_RAC1_GTPASE_CYCLE		178	0.373002	1.76279	0	0.0176211	0.808	6195	tags=44%, list=26%, signal=59%
REACTOME_DOWNSTREAM_SIGNALING_OF_ACTIVATED_FGFR4	REACTOME_DOWNSTREAM_SIGNALING_OF_ACTIVATED_FGFR4		21	0.566597	1.76028	0.00626305	0.0179363	0.818	2665	tags=33%, list=11%, signal=38%
KEGG_ALDOSTERONE_REGULATED_SODIUM_REABSORPTION	KEGG_ALDOSTERONE_REGULATED_SODIUM_REABSORPTION		39	0.48941	1.75818	0.00205761	0.0182775	0.829	2790	tags=31%, list=12%, signal=35%
REACTOME_GROWTH_HORMONE_RECEPTOR_SIGNALING	REACTOME_GROWTH_HORMONE_RECEPTOR_SIGNALING		21	0.56742	1.75728	0	0.0183419	0.831	4030	tags=48%, list=17%, signal=57%
REACTOME_NR1H2_AND_NR1H3_MEDIATED_SIGNALING	REACTOME_NR1H2_AND_NR1H3_MEDIATED_SIGNALING		42	0.477686	1.74871	0.00195312	0.0199452	0.859	4580	tags=38%, list=20%, signal=47%
REACTOME_TIE2_SIGNALING	REACTOME_TIE2_SIGNALING		17	0.605475	1.74784	0.0123203	0.0198918	0.86	2665	tags=41%, list=11%, signal=46%
REACTOME_GENE_AND_PROTEIN_EXPRESSION_BY_JAK_STAT_SIGNALING_AFTER_INTERLEUKIN_12_STIMULATION	REACTOME_GENE_AND_PROTEIN_EXPRESSION_BY_JAK_STAT_SIGNALING_AFTER_INTERLEUKIN_12_STIMULATION		37	0.487177	1.7466	0.00421053	0.0199526	0.862	2977	tags=38%, list=13%, signal=43%
REACTOME_FRS_MEDIATED_FGFR4_SIGNALING	REACTOME_FRS_MEDIATED_FGFR4_SIGNALING		16	0.60231	1.74646	0.00408998	0.0198404	0.863	1836	tags=31%, list=8%, signal=34%
REACTOME_SIGNALING_BY_PDGFR_IN_DISEASE	REACTOME_SIGNALING_BY_PDGFR_IN_DISEASE		20	0.568318	1.74591	0.0021322	0.0197897	0.864	2779	tags=50%, list=12%, signal=57%
REACTOME_DDX58_IFIH1_MEDIATED_INDUCTION_OF_INTERFERON_ALPHA_BETA	REACTOME_DDX58_IFIH1_MEDIATED_INDUCTION_OF_INTERFERON_ALPHA_BETA		66	0.430875	1.74139	0	0.0205551	0.88	4005	tags=42%, list=17%, signal=51%
KEGG_ENDOMETRIAL_CANCER	KEGG_ENDOMETRIAL_CANCER		52	0.459973	1.7404	0.00208333	0.0206171	0.882	3235	tags=35%, list=14%, signal=40%
REACTOME_RUNX1_REGULATES_GENES_INVOLVED_IN_MEGAKARYOCYTE_DIFFERENTIATION_AND_PLATELET_FUNCTION	REACTOME_RUNX1_REGULATES_GENES_INVOLVED_IN_MEGAKARYOCYTE_DIFFERENTIATION_AND_PLATELET_FUNCTION		38	0.494963	1.7386	0.00819672	0.020838	0.888	2123	tags=29%, list=9%, signal=32%
REACTOME_GAP_JUNCTION_TRAFFICKING_AND_REGULATION	REACTOME_GAP_JUNCTION_TRAFFICKING_AND_REGULATION		36	0.48346	1.73252	0	0.0217965	0.896	7625	tags=58%, list=33%, signal=86%
KEGG_REGULATION_OF_ACTIN_CYTOSKELETON	KEGG_REGULATION_OF_ACTIN_CYTOSKELETON		193	0.364338	1.73136	0	0.0218714	0.896	5216	tags=35%, list=22%, signal=45%
REACTOME_ONCOGENIC_MAPK_SIGNALING	REACTOME_ONCOGENIC_MAPK_SIGNALING		77	0.417395	1.7298	0.00219298	0.0220099	0.9	3194	tags=34%, list=14%, signal=39%
REACTOME_IRS_MEDIATED_SIGNALLING	REACTOME_IRS_MEDIATED_SIGNALLING		40	0.477759	1.72938	0.0021322	0.0219655	0.902	2665	tags=28%, list=11%, signal=31%
REACTOME_CD28_CO_STIMULATION	REACTOME_CD28_CO_STIMULATION		33	0.504993	1.72886	0.00214133	0.0219228	0.902	2665	tags=33%, list=11%, signal=38%
REACTOME_P75NTR_SIGNALS_VIA_NF_KB	REACTOME_P75NTR_SIGNALS_VIA_NF_KB		15	0.618957	1.72748	0.0127932	0.0220291	0.902	3164	tags=53%, list=14%, signal=62%
REACTOME_INTERLEUKIN_2_FAMILY_SIGNALING	REACTOME_INTERLEUKIN_2_FAMILY_SIGNALING		39	0.494002	1.7233	0.0059761	0.0228418	0.911	2790	tags=33%, list=12%, signal=38%
REACTOME_TOLL_LIKE_RECEPTOR_TLR1_TLR2_CASCADE	REACTOME_TOLL_LIKE_RECEPTOR_TLR1_TLR2_CASCADE		99	0.407386	1.72324	0	0.0227092	0.911	3523	tags=34%, list=15%, signal=40%
REACTOME_DECTIN_2_FAMILY	REACTOME_DECTIN_2_FAMILY		24	0.543616	1.72154	0.00387597	0.0228626	0.918	4376	tags=38%, list=19%, signal=46%
REACTOME_SIGNAL_AMPLIFICATION	REACTOME_SIGNAL_AMPLIFICATION		29	0.51543	1.72116	0.00205339	0.0227866	0.919	3645	tags=38%, list=16%, signal=45%
KEGG_FC_EPSILON_RI_SIGNALING_PATHWAY	KEGG_FC_EPSILON_RI_SIGNALING_PATHWAY		67	0.427292	1.71986	0	0.0229588	0.922	2790	tags=30%, list=12%, signal=34%
REACTOME_PLATELET_ACTIVATION_SIGNALING_AND_AGGREGATION	REACTOME_PLATELET_ACTIVATION_SIGNALING_AND_AGGREGATION		240	0.351528	1.71927	0	0.0229185	0.922	5104	tags=33%, list=22%, signal=41%
REACTOME_SIGNALING_BY_NTRKS	REACTOME_SIGNALING_BY_NTRKS		129	0.380391	1.71838	0	0.0229684	0.923	2784	tags=27%, list=12%, signal=31%
REACTOME_CONSTITUTIVE_SIGNALING_BY_ABERRANT_PI3K_IN_CANCER	REACTOME_CONSTITUTIVE_SIGNALING_BY_ABERRANT_PI3K_IN_CANCER		69	0.424095	1.71346	0.00202429	0.0238188	0.931	4856	tags=36%, list=21%, signal=46%
HALLMARK_ANGIOGENESIS	HALLMARK_ANGIOGENESIS		33	0.496822	1.71235	0.00209644	0.023908	0.934	7628	tags=67%, list=33%, signal=99%
KEGG_MAPK_SIGNALING_PATHWAY	KEGG_MAPK_SIGNALING_PATHWAY		236	0.350594	1.71052	0	0.0240825	0.938	3840	tags=28%, list=16%, signal=34%
REACTOME_PEPTIDE_LIGAND_BINDING_RECEPTORS	REACTOME_PEPTIDE_LIGAND_BINDING_RECEPTORS		133	0.378066	1.70867	0	0.0242707	0.94	7218	tags=48%, list=31%, signal=69%
REACTOME_SYNTHESIS_OF_ACTIVE_UBIQUITIN_ROLES_OF_E1_AND_E2_ENZYMES	REACTOME_SYNTHESIS_OF_ACTIVE_UBIQUITIN_ROLES_OF_E1_AND_E2_ENZYMES		30	0.510916	1.70445	0.0126316	0.0250249	0.948	5226	tags=43%, list=22%, signal=56%
REACTOME_SIGNALING_BY_PDGF	REACTOME_SIGNALING_BY_PDGF		58	0.437948	1.70296	0	0.0252151	0.948	4970	tags=41%, list=21%, signal=52%
REACTOME_TOLL_LIKE_RECEPTOR_CASCADES	REACTOME_TOLL_LIKE_RECEPTOR_CASCADES		150	0.375583	1.70151	0	0.0253726	0.951	3650	tags=32%, list=16%, signal=38%
REACTOME_INSULIN_RECEPTOR_SIGNALLING_CASCADE	REACTOME_INSULIN_RECEPTOR_SIGNALLING_CASCADE		45	0.462298	1.69888	0.00858369	0.0257422	0.953	2665	tags=27%, list=11%, signal=30%
REACTOME_NEGATIVE_REGULATION_OF_FGFR2_SIGNALING	REACTOME_NEGATIVE_REGULATION_OF_FGFR2_SIGNALING		27	0.516072	1.69257	0.01222	0.0268319	0.961	3164	tags=33%, list=14%, signal=39%
REACTOME_COLLAGEN_CHAIN_TRIMERIZATION	REACTOME_COLLAGEN_CHAIN_TRIMERIZATION		44	0.462643	1.69254	0.00428265	0.026661	0.961	8355	tags=61%, list=36%, signal=95%
KEGG_CHRONIC_MYELOID_LEUKEMIA	KEGG_CHRONIC_MYELOID_LEUKEMIA		72	0.414268	1.69101	0	0.0268564	0.961	2790	tags=32%, list=12%, signal=36%
KEGG_LONG_TERM_POTENTIATION	KEGG_LONG_TERM_POTENTIATION		63	0.422633	1.68858	0.00208333	0.0273702	0.965	5216	tags=40%, list=22%, signal=51%
REACTOME_IL_6_TYPE_CYTOKINE_RECEPTOR_LIGAND_INTERACTIONS	REACTOME_IL_6_TYPE_CYTOKINE_RECEPTOR_LIGAND_INTERACTIONS		15	0.591236	1.68836	0.0172043	0.027273	0.966	2951	tags=53%, list=13%, signal=61%
REACTOME_INTERLEUKIN_12_SIGNALING	REACTOME_INTERLEUKIN_12_SIGNALING		46	0.454408	1.68551	0.00819672	0.0278318	0.967	2977	tags=33%, list=13%, signal=37%
REACTOME_EXTRACELLULAR_MATRIX_ORGANIZATION	REACTOME_EXTRACELLULAR_MATRIX_ORGANIZATION		278	0.339529	1.68202	0	0.0284704	0.97	7098	tags=42%, list=30%, signal=60%
REACTOME_RAF_ACTIVATION	REACTOME_RAF_ACTIVATION		34	0.485437	1.67796	0.00856531	0.0293647	0.973	3194	tags=41%, list=14%, signal=48%
REACTOME_TOLL_LIKE_RECEPTOR_9_TLR9_CASCADE	REACTOME_TOLL_LIKE_RECEPTOR_9_TLR9_CASCADE		93	0.388263	1.67114	0	0.031159	0.978	3523	tags=33%, list=15%, signal=39%
REACTOME_FOXO_MEDIATED_TRANSCRIPTION	REACTOME_FOXO_MEDIATED_TRANSCRIPTION		62	0.419996	1.66927	0	0.0315133	0.98	3067	tags=34%, list=13%, signal=39%
REACTOME_CELL_CELL_COMMUNICATION	REACTOME_CELL_CELL_COMMUNICATION		111	0.382759	1.66513	0	0.0324664	0.981	4800	tags=32%, list=21%, signal=39%
REACTOME_INFECTION_WITH_MYCOBACTERIUM_TUBERCULOSIS	REACTOME_INFECTION_WITH_MYCOBACTERIUM_TUBERCULOSIS		27	0.511305	1.66403	0.0119522	0.0325641	0.983	3164	tags=37%, list=14%, signal=43%
KEGG_TOLL_LIKE_RECEPTOR_SIGNALING_PATHWAY	KEGG_TOLL_LIKE_RECEPTOR_SIGNALING_PATHWAY		89	0.392407	1.66141	0.00225734	0.0332101	0.986	4015	tags=34%, list=17%, signal=41%
REACTOME_THROMBOXANE_SIGNALLING_THROUGH_TP_RECEPTOR	REACTOME_THROMBOXANE_SIGNALLING_THROUGH_TP_RECEPTOR		21	0.528734	1.65977	0.0108225	0.0334562	0.988	5104	tags=48%, list=22%, signal=61%
REACTOME_SIGNALING_BY_KIT_IN_DISEASE	REACTOME_SIGNALING_BY_KIT_IN_DISEASE		20	0.535043	1.65743	0.0189076	0.0338545	0.988	2665	tags=45%, list=11%, signal=51%
KEGG_SYSTEMIC_LUPUS_ERYTHEMATOSUS	KEGG_SYSTEMIC_LUPUS_ERYTHEMATOSUS		52	0.440844	1.65716	0.0077821	0.0337411	0.989	3579	tags=33%, list=15%, signal=39%
REACTOME_EXTRA_NUCLEAR_ESTROGEN_SIGNALING	REACTOME_EXTRA_NUCLEAR_ESTROGEN_SIGNALING		70	0.408785	1.65443	0	0.0342972	0.989	5104	tags=41%, list=22%, signal=53%
REACTOME_GPCR_LIGAND_BINDING	REACTOME_GPCR_LIGAND_BINDING		300	0.330959	1.65348	0	0.0343737	0.989	5104	tags=29%, list=22%, signal=37%
REACTOME_DOWNSTREAM_SIGNAL_TRANSDUCTION	REACTOME_DOWNSTREAM_SIGNAL_TRANSDUCTION		29	0.483064	1.65279	0.0123203	0.0343487	0.989	2743	tags=38%, list=12%, signal=43%
REACTOME_G_ALPHA_I_SIGNALLING_EVENTS	REACTOME_G_ALPHA_I_SIGNALLING_EVENTS		231	0.340234	1.65259	0	0.034205	0.989	5268	tags=32%, list=23%, signal=41%
KEGG_COMPLEMENT_AND_COAGULATION_CASCADES	KEGG_COMPLEMENT_AND_COAGULATION_CASCADES		50	0.433508	1.65069	0.00630252	0.0345657	0.989	3124	tags=26%, list=13%, signal=30%
REACTOME_MUSCLE_CONTRACTION	REACTOME_MUSCLE_CONTRACTION		168	0.349495	1.64742	0.00210084	0.0354758	0.99	5542	tags=33%, list=24%, signal=43%
HALLMARK_MITOTIC_SPINDLE	HALLMARK_MITOTIC_SPINDLE		198	0.344455	1.64566	0	0.0357333	0.991	5792	tags=36%, list=25%, signal=48%
REACTOME_G_BETA_GAMMA_SIGNALLING_THROUGH_PI3KGAMMA	REACTOME_G_BETA_GAMMA_SIGNALLING_THROUGH_PI3KGAMMA		23	0.521478	1.64563	0.0146751	0.0355337	0.991	6385	tags=57%, list=27%, signal=78%
REACTOME_ACTIVATION_OF_BH3_ONLY_PROTEINS	REACTOME_ACTIVATION_OF_BH3_ONLY_PROTEINS		30	0.492537	1.64471	0.0179283	0.0356194	0.992	2863	tags=47%, list=12%, signal=53%
REACTOME_CELL_EXTRACELLULAR_MATRIX_INTERACTIONS	REACTOME_CELL_EXTRACELLULAR_MATRIX_INTERACTIONS		18	0.54176	1.64296	0.0189873	0.035985	0.992	4465	tags=39%, list=19%, signal=48%
KEGG_ANTIGEN_PROCESSING_AND_PRESENTATION	KEGG_ANTIGEN_PROCESSING_AND_PRESENTATION		64	0.415135	1.6403	0	0.0365442	0.992	5750	tags=52%, list=25%, signal=68%
REACTOME_TRANSCRIPTIONAL_ACTIVITY_OF_SMAD2_SMAD3_SMAD4_HETEROTRIMER	REACTOME_TRANSCRIPTIONAL_ACTIVITY_OF_SMAD2_SMAD3_SMAD4_HETEROTRIMER		43	0.440888	1.63912	0.00207469	0.0366601	0.992	5811	tags=51%, list=25%, signal=68%
REACTOME_SIGNALING_BY_ERBB2_IN_CANCER	REACTOME_SIGNALING_BY_ERBB2_IN_CANCER		25	0.515118	1.63611	0.0262626	0.0374124	0.992	4107	tags=44%, list=18%, signal=53%
REACTOME_G_PROTEIN_ACTIVATION	REACTOME_G_PROTEIN_ACTIVATION		19	0.542977	1.62995	0.0241935	0.0390194	0.994	6385	tags=58%, list=27%, signal=80%
REACTOME_COSTIMULATION_BY_THE_CD28_FAMILY	REACTOME_COSTIMULATION_BY_THE_CD28_FAMILY		68	0.40158	1.6297	0.010101	0.0389293	0.994	6431	tags=50%, list=27%, signal=69%
REACTOME_SCAVENGING_BY_CLASS_A_RECEPTORS	REACTOME_SCAVENGING_BY_CLASS_A_RECEPTORS		18	0.543533	1.62873	0.033264	0.0390026	0.994	6970	tags=56%, list=30%, signal=79%
REACTOME_ACTIVATION_OF_MATRIX_METALLOPROTEINASES	REACTOME_ACTIVATION_OF_MATRIX_METALLOPROTEINASES		28	0.489118	1.62823	0.0142276	0.0389418	0.994	7096	tags=64%, list=30%, signal=92%
REACTOME_REGULATION_OF_MECP2_EXPRESSION_AND_ACTIVITY	REACTOME_REGULATION_OF_MECP2_EXPRESSION_AND_ACTIVITY		31	0.483293	1.62491	0.010352	0.0398558	0.994	5108	tags=45%, list=22%, signal=58%
REACTOME_CONSTITUTIVE_SIGNALING_BY_EGFRVIII	REACTOME_CONSTITUTIVE_SIGNALING_BY_EGFRVIII		15	0.574873	1.6242	0.019802	0.0399356	0.995	4856	tags=47%, list=21%, signal=59%
REACTOME_ADP_SIGNALLING_THROUGH_P2Y_PURINOCEPTOR_12	REACTOME_ADP_SIGNALLING_THROUGH_P2Y_PURINOCEPTOR_12		19	0.541364	1.62268	0.0251572	0.0402076	0.996	6385	tags=58%, list=27%, signal=80%
KEGG_PANCREATIC_CANCER	KEGG_PANCREATIC_CANCER		69	0.402455	1.62142	0.00217391	0.0403611	0.997	2790	tags=32%, list=12%, signal=36%
KEGG_GLYCOSPHINGOLIPID_BIOSYNTHESIS_LACTO_AND_NEOLACTO_SERIES	KEGG_GLYCOSPHINGOLIPID_BIOSYNTHESIS_LACTO_AND_NEOLACTO_SERIES		25	0.501735	1.62135	0.0123967	0.0401792	0.997	3678	tags=44%, list=16%, signal=52%
REACTOME_CELL_JUNCTION_ORGANIZATION	REACTOME_CELL_JUNCTION_ORGANIZATION		76	0.395822	1.61832	0.00646552	0.0409963	0.997	4786	tags=32%, list=20%, signal=40%
REACTOME_FRS_MEDIATED_FGFR1_SIGNALING	REACTOME_FRS_MEDIATED_FGFR1_SIGNALING		16	0.555832	1.61823	0.026971	0.0407995	0.997	2421	tags=31%, list=10%, signal=35%
REACTOME_SEALING_OF_THE_NUCLEAR_ENVELOPE_NE_BY_ESCRT_III	REACTOME_SEALING_OF_THE_NUCLEAR_ENVELOPE_NE_BY_ESCRT_III		27	0.495053	1.61765	0.0205761	0.0408061	0.997	2378	tags=33%, list=10%, signal=37%
KEGG_ADIPOCYTOKINE_SIGNALING_PATHWAY	KEGG_ADIPOCYTOKINE_SIGNALING_PATHWAY		62	0.407381	1.61702	0.00217391	0.0408067	0.997	3558	tags=34%, list=15%, signal=40%
REACTOME_MECP2_REGULATES_NEURONAL_RECEPTORS_AND_CHANNELS	REACTOME_MECP2_REGULATES_NEURONAL_RECEPTORS_AND_CHANNELS		17	0.545241	1.61661	0.0261569	0.0407284	0.997	3386	tags=41%, list=14%, signal=48%
REACTOME_TRANSCRIPTIONAL_REGULATION_BY_MECP2	REACTOME_TRANSCRIPTIONAL_REGULATION_BY_MECP2		58	0.412328	1.61644	0.00657895	0.0405768	0.997	4580	tags=33%, list=20%, signal=41%
REACTOME_FRS_MEDIATED_FGFR3_SIGNALING	REACTOME_FRS_MEDIATED_FGFR3_SIGNALING		16	0.54765	1.6164	0.025641	0.0403934	0.997	1836	tags=25%, list=8%, signal=27%
REACTOME_NEGATIVE_REGULATION_OF_FLT3	REACTOME_NEGATIVE_REGULATION_OF_FLT3		15	0.575602	1.61499	0.0203252	0.0407032	0.997	4402	tags=53%, list=19%, signal=66%
REACTOME_G_ALPHA_Q_SIGNALLING_EVENTS	REACTOME_G_ALPHA_Q_SIGNALLING_EVENTS		160	0.339258	1.61498	0	0.0405017	0.997	3747	tags=24%, list=16%, signal=28%
REACTOME_DOWNSTREAM_SIGNALING_OF_ACTIVATED_FGFR1	REACTOME_DOWNSTREAM_SIGNALING_OF_ACTIVATED_FGFR1		24	0.496144	1.61456	0.0252632	0.0404444	0.997	2665	tags=29%, list=11%, signal=33%
REACTOME_NEGATIVE_REGULATION_OF_THE_PI3K_AKT_NETWORK	REACTOME_NEGATIVE_REGULATION_OF_THE_PI3K_AKT_NETWORK		103	0.369324	1.6121	0.00403226	0.0410235	0.997	4883	tags=35%, list=21%, signal=44%
REACTOME_SIGNALING_BY_FGFR_IN_DISEASE	REACTOME_SIGNALING_BY_FGFR_IN_DISEASE		55	0.419874	1.61194	0.015873	0.0408621	0.997	2665	tags=29%, list=11%, signal=33%
REACTOME_SIGNALING_BY_RECEPTOR_TYROSINE_KINASES	REACTOME_SIGNALING_BY_RECEPTOR_TYROSINE_KINASES		478	0.307037	1.60929	0	0.0415256	0.997	4655	tags=28%, list=20%, signal=35%
HALLMARK_UV_RESPONSE_UP	HALLMARK_UV_RESPONSE_UP		152	0.347809	1.60808	0	0.0417437	0.997	4040	tags=32%, list=17%, signal=38%
REACTOME_DOWNSTREAM_SIGNALING_OF_ACTIVATED_FGFR3	REACTOME_DOWNSTREAM_SIGNALING_OF_ACTIVATED_FGFR3		21	0.527775	1.60569	0.0203252	0.0422752	0.997	2665	tags=29%, list=11%, signal=32%
REACTOME_SUMOYLATION_OF_TRANSCRIPTION_COFACTORS	REACTOME_SUMOYLATION_OF_TRANSCRIPTION_COFACTORS		42	0.434535	1.60511	0.0111111	0.0423171	0.997	1149	tags=24%, list=5%, signal=25%
KEGG_PATHWAYS_IN_CANCER	KEGG_PATHWAYS_IN_CANCER		305	0.317326	1.60362	0	0.0426843	0.997	5006	tags=32%, list=21%, signal=41%
REACTOME_INTERFERON_GAMMA_SIGNALING	REACTOME_INTERFERON_GAMMA_SIGNALING		89	0.378069	1.60274	0.00210084	0.0427743	0.997	4899	tags=40%, list=21%, signal=51%
REACTOME_COLLAGEN_FORMATION	REACTOME_COLLAGEN_FORMATION		87	0.386298	1.60169	0.0043573	0.0429446	0.997	8355	tags=54%, list=36%, signal=84%
REACTOME_TRANSCRIPTIONAL_REGULATION_OF_WHITE_ADIPOCYTE_DIFFERENTIATION	REACTOME_TRANSCRIPTIONAL_REGULATION_OF_WHITE_ADIPOCYTE_DIFFERENTIATION		83	0.380583	1.60163	0.0063425	0.0427805	0.997	3734	tags=33%, list=16%, signal=39%
REACTOME_INTERLEUKIN_RECEPTOR_SHC_SIGNALING	REACTOME_INTERLEUKIN_RECEPTOR_SHC_SIGNALING		24	0.497092	1.59793	0.012474	0.0439511	0.997	2790	tags=38%, list=12%, signal=43%
KEGG_GNRH_SIGNALING_PATHWAY	KEGG_GNRH_SIGNALING_PATHWAY		83	0.383652	1.59587	0.00390625	0.0444615	0.999	3741	tags=31%, list=16%, signal=37%
REACTOME_PROSTACYCLIN_SIGNALLING_THROUGH_PROSTACYCLIN_RECEPTOR	REACTOME_PROSTACYCLIN_SIGNALLING_THROUGH_PROSTACYCLIN_RECEPTOR		17	0.544409	1.59355	0.0303644	0.0450619	1	6385	tags=65%, list=27%, signal=89%
REACTOME_SURFACTANT_METABOLISM	REACTOME_SURFACTANT_METABOLISM		23	0.508058	1.58844	0.0242915	0.0466594	1	4369	tags=35%, list=19%, signal=43%
REACTOME_RET_SIGNALING	REACTOME_RET_SIGNALING		37	0.445969	1.58465	0.0171306	0.0480188	1	3875	tags=41%, list=17%, signal=49%
REACTOME_ACTIVATION_OF_AMPK_DOWNSTREAM_OF_NMDARS	REACTOME_ACTIVATION_OF_AMPK_DOWNSTREAM_OF_NMDARS		23	0.509412	1.58336	0.0170213	0.0483538	1	3194	tags=35%, list=14%, signal=40%
REACTOME_SIGNALING_BY_TYPE_1_INSULIN_LIKE_GROWTH_FACTOR_1_RECEPTOR_IGF1R	REACTOME_SIGNALING_BY_TYPE_1_INSULIN_LIKE_GROWTH_FACTOR_1_RECEPTOR_IGF1R		46	0.427132	1.58136	0.0119522	0.0489099	1	2665	tags=24%, list=11%, signal=27%
REACTOME_ADP_SIGNALLING_THROUGH_P2Y_PURINOCEPTOR_1	REACTOME_ADP_SIGNALLING_THROUGH_P2Y_PURINOCEPTOR_1		22	0.501166	1.57966	0.0375276	0.0493882	1	6385	tags=55%, list=27%, signal=75%
REACTOME_ESR_MEDIATED_SIGNALING	REACTOME_ESR_MEDIATED_SIGNALING		155	0.342115	1.57651	0.002079	0.0503083	1	3945	tags=30%, list=17%, signal=36%
REACTOME_ACTIVATION_OF_BAD_AND_TRANSLOCATION_TO_MITOCHONDRIA	REACTOME_ACTIVATION_OF_BAD_AND_TRANSLOCATION_TO_MITOCHONDRIA		15	0.55567	1.57575	0.0216963	0.0503759	1	2784	tags=53%, list=12%, signal=60%
REACTOME_GOLGI_ASSOCIATED_VESICLE_BIOGENESIS	REACTOME_GOLGI_ASSOCIATED_VESICLE_BIOGENESIS		55	0.412863	1.57514	0.0060241	0.0503275	1	2983	tags=29%, list=13%, signal=33%
REACTOME_PI3K_AKT_SIGNALING_IN_CANCER	REACTOME_PI3K_AKT_SIGNALING_IN_CANCER		96	0.363189	1.57358	0.00413223	0.0507166	1	6640	tags=44%, list=28%, signal=61%
REACTOME_THE_NLRP3_INFLAMMASOME	REACTOME_THE_NLRP3_INFLAMMASOME		16	0.552707	1.5727	0.0392157	0.050883	1	4861	tags=50%, list=21%, signal=63%
REACTOME_DEUBIQUITINATION	REACTOME_DEUBIQUITINATION		229	0.322192	1.57181	0	0.0510399	1	3271	tags=25%, list=14%, signal=29%
REACTOME_REGULATION_OF_LIPID_METABOLISM_BY_PPARALPHA	REACTOME_REGULATION_OF_LIPID_METABOLISM_BY_PPARALPHA		110	0.353476	1.57025	0.00421941	0.0514054	1	3077	tags=26%, list=13%, signal=30%
REACTOME_INTEGRIN_CELL_SURFACE_INTERACTIONS	REACTOME_INTEGRIN_CELL_SURFACE_INTERACTIONS		80	0.375441	1.56927	0	0.05155	1	4059	tags=28%, list=17%, signal=33%
REACTOME_NRIF_SIGNALS_CELL_DEATH_FROM_THE_NUCLEUS	REACTOME_NRIF_SIGNALS_CELL_DEATH_FROM_THE_NUCLEUS		15	0.548837	1.56835	0.0372671	0.0516877	1	3543	tags=40%, list=15%, signal=47%
REACTOME_PURINERGIC_SIGNALING_IN_LEISHMANIASIS_INFECTION	REACTOME_PURINERGIC_SIGNALING_IN_LEISHMANIASIS_INFECTION		26	0.482178	1.56821	0.0168421	0.0515212	1	5161	tags=50%, list=22%, signal=64%
REACTOME_TRANSCRIPTIONAL_REGULATION_OF_GRANULOPOIESIS	REACTOME_TRANSCRIPTIONAL_REGULATION_OF_GRANULOPOIESIS		30	0.463834	1.56701	0.0231579	0.0517145	1	3602	tags=40%, list=15%, signal=47%
REACTOME_EPH_EPHRIN_SIGNALING	REACTOME_EPH_EPHRIN_SIGNALING		90	0.364073	1.56556	0.00622407	0.0519769	1	4376	tags=30%, list=19%, signal=37%
REACTOME_GABA_B_RECEPTOR_ACTIVATION	REACTOME_GABA_B_RECEPTOR_ACTIVATION		38	0.432287	1.56348	0.0191898	0.0525294	1	6454	tags=47%, list=28%, signal=65%
REACTOME_SIGNALING_BY_ERBB2_ECD_MUTANTS	REACTOME_SIGNALING_BY_ERBB2_ECD_MUTANTS		15	0.552128	1.56056	0.0414938	0.0533699	1	4856	tags=47%, list=21%, signal=59%
REACTOME_RAC3_GTPASE_CYCLE	REACTOME_RAC3_GTPASE_CYCLE		89	0.369727	1.56003	0.00449438	0.0533157	1	6304	tags=49%, list=27%, signal=67%
REACTOME_NR1H3_NR1H2_REGULATE_GENE_EXPRESSION_LINKED_TO_CHOLESTEROL_TRANSPORT_AND_EFFLUX	REACTOME_NR1H3_NR1H2_REGULATE_GENE_EXPRESSION_LINKED_TO_CHOLESTEROL_TRANSPORT_AND_EFFLUX		34	0.445841	1.55654	0.022	0.0546474	1	2002	tags=24%, list=9%, signal=26%
REACTOME_TRANSCRIPTIONAL_REGULATION_OF_PLURIPOTENT_STEM_CELLS	REACTOME_TRANSCRIPTIONAL_REGULATION_OF_PLURIPOTENT_STEM_CELLS		25	0.473602	1.55471	0.0146138	0.0551215	1	6764	tags=56%, list=29%, signal=79%
HALLMARK_REACTIVE_OXYGEN_SPECIES_PATHWAY	HALLMARK_REACTIVE_OXYGEN_SPECIES_PATHWAY		47	0.413271	1.55188	0.00431965	0.056157	1	5721	tags=45%, list=24%, signal=59%
REACTOME_DEATH_RECEPTOR_SIGNALLING	REACTOME_DEATH_RECEPTOR_SIGNALLING		138	0.342552	1.55152	0.00408998	0.0560709	1	4739	tags=33%, list=20%, signal=42%
REACTOME_BMAL1_CLOCK_NPAS2_ACTIVATES_CIRCADIAN_GENE_EXPRESSION	REACTOME_BMAL1_CLOCK_NPAS2_ACTIVATES_CIRCADIAN_GENE_EXPRESSION		25	0.483238	1.5492	0.0289855	0.0568109	1	4523	tags=48%, list=19%, signal=59%
REACTOME_NUCLEOTIDE_BINDING_DOMAIN_LEUCINE_RICH_REPEAT_CONTAINING_RECEPTOR_NLR_SIGNALING_PATHWAYS	REACTOME_NUCLEOTIDE_BINDING_DOMAIN_LEUCINE_RICH_REPEAT_CONTAINING_RECEPTOR_NLR_SIGNALING_PATHWAYS		56	0.40236	1.54812	0.0210526	0.0570653	1	4040	tags=36%, list=17%, signal=43%
REACTOME_TBC_RABGAPS	REACTOME_TBC_RABGAPS		44	0.415614	1.54703	0.0179775	0.0573337	1	4255	tags=39%, list=18%, signal=47%
REACTOME_SEMA4D_INDUCED_CELL_MIGRATION_AND_GROWTH_CONE_COLLAPSE	REACTOME_SEMA4D_INDUCED_CELL_MIGRATION_AND_GROWTH_CONE_COLLAPSE		20	0.498429	1.54605	0.0244399	0.057526	1	4840	tags=50%, list=21%, signal=63%
REACTOME_SIGNALING_BY_NTRK3_TRKC	REACTOME_SIGNALING_BY_NTRK3_TRKC		17	0.519064	1.54425	0.0294118	0.0581039	1	2665	tags=29%, list=11%, signal=33%
KEGG_P53_SIGNALING_PATHWAY	KEGG_P53_SIGNALING_PATHWAY		65	0.381676	1.54278	0.0083682	0.0586213	1	2113	tags=23%, list=9%, signal=25%
KEGG_ERBB_SIGNALING_PATHWAY	KEGG_ERBB_SIGNALING_PATHWAY		85	0.365199	1.54066	0.00657895	0.0592889	1	5839	tags=41%, list=25%, signal=55%
REACTOME_DOWNREGULATION_OF_ERBB2_SIGNALING	REACTOME_DOWNREGULATION_OF_ERBB2_SIGNALING		28	0.464746	1.53804	0.0286885	0.0601452	1	4779	tags=39%, list=20%, signal=49%
REACTOME_P75_NTR_RECEPTOR_MEDIATED_SIGNALLING	REACTOME_P75_NTR_RECEPTOR_MEDIATED_SIGNALLING		95	0.356197	1.5371	0.00680272	0.0603642	1	4739	tags=32%, list=20%, signal=39%
HALLMARK_INTERFERON_GAMMA_RESPONSE	HALLMARK_INTERFERON_GAMMA_RESPONSE		198	0.326263	1.53513	0	0.0609446	1	5848	tags=38%, list=25%, signal=51%
REACTOME_SIGNALING_BY_MODERATE_KINASE_ACTIVITY_BRAF_MUTANTS	REACTOME_SIGNALING_BY_MODERATE_KINASE_ACTIVITY_BRAF_MUTANTS		42	0.418511	1.53504	0.0241935	0.060733	1	5499	tags=43%, list=24%, signal=56%
KEGG_EPITHELIAL_CELL_SIGNALING_IN_HELICOBACTER_PYLORI_INFECTION	KEGG_EPITHELIAL_CELL_SIGNALING_IN_HELICOBACTER_PYLORI_INFECTION		65	0.37535	1.53277	0.0043384	0.061396	1	3852	tags=34%, list=16%, signal=40%
KEGG_CELL_ADHESION_MOLECULES_CAMS	KEGG_CELL_ADHESION_MOLECULES_CAMS		117	0.344605	1.53236	0	0.061357	1	6529	tags=42%, list=28%, signal=58%
REACTOME_FOXO_MEDIATED_TRANSCRIPTION_OF_OXIDATIVE_STRESS_METABOLIC_AND_NEURONAL_GENES	REACTOME_FOXO_MEDIATED_TRANSCRIPTION_OF_OXIDATIVE_STRESS_METABOLIC_AND_NEURONAL_GENES		27	0.463184	1.52888	0.0247423	0.0625716	1	3067	tags=37%, list=13%, signal=43%
REACTOME_SIGNALING_BY_NTRK2_TRKB	REACTOME_SIGNALING_BY_NTRK2_TRKB		25	0.469756	1.52878	0.0373444	0.0623774	1	2665	tags=32%, list=11%, signal=36%
REACTOME_SYNTHESIS_OF_PIPS_AT_THE_PLASMA_MEMBRANE	REACTOME_SYNTHESIS_OF_PIPS_AT_THE_PLASMA_MEMBRANE		52	0.397382	1.52802	0.0146138	0.0624978	1	3548	tags=35%, list=15%, signal=41%
REACTOME_DAP12_SIGNALING	REACTOME_DAP12_SIGNALING		28	0.459379	1.52701	0.02537	0.06271	1	2905	tags=32%, list=12%, signal=37%
REACTOME_SEMAPHORIN_INTERACTIONS	REACTOME_SEMAPHORIN_INTERACTIONS		63	0.381526	1.5256	0.0148305	0.0632165	1	6118	tags=48%, list=26%, signal=64%
REACTOME_FORMATION_OF_THE_CORNIFIED_ENVELOPE	REACTOME_FORMATION_OF_THE_CORNIFIED_ENVELOPE		50	0.398664	1.52542	0.00877193	0.0630483	1	6288	tags=44%, list=27%, signal=60%
REACTOME_INWARDLY_RECTIFYING_K_CHANNELS	REACTOME_INWARDLY_RECTIFYING_K_CHANNELS		31	0.440435	1.52494	0.0254777	0.0630501	1	6454	tags=48%, list=28%, signal=67%
REACTOME_ATTENUATION_PHASE	REACTOME_ATTENUATION_PHASE		25	0.468664	1.52452	0.039666	0.0630353	1	3945	tags=48%, list=17%, signal=58%
REACTOME_INTERLEUKIN_17_SIGNALING	REACTOME_INTERLEUKIN_17_SIGNALING		69	0.377563	1.52398	0.00831601	0.0630649	1	3164	tags=30%, list=14%, signal=35%
KEGG_COLORECTAL_CANCER	KEGG_COLORECTAL_CANCER		62	0.390673	1.52397	0.0221729	0.0628251	1	2790	tags=32%, list=12%, signal=37%
KEGG_APOPTOSIS	KEGG_APOPTOSIS		82	0.361314	1.52244	0.00215983	0.0633436	1	4316	tags=41%, list=18%, signal=51%
REACTOME_METALLOPROTEASE_DUBS	REACTOME_METALLOPROTEASE_DUBS		17	0.526672	1.5216	0.0468085	0.0634485	1	3164	tags=41%, list=14%, signal=48%
KEGG_MTOR_SIGNALING_PATHWAY	KEGG_MTOR_SIGNALING_PATHWAY		49	0.399049	1.52075	0.0194384	0.0636353	1	2790	tags=24%, list=12%, signal=28%
REACTOME_MYOGENESIS	REACTOME_MYOGENESIS		25	0.462784	1.51344	0.0308642	0.0667432	1	2649	tags=28%, list=11%, signal=32%
KEGG_VEGF_SIGNALING_PATHWAY	KEGG_VEGF_SIGNALING_PATHWAY		65	0.38221	1.51321	0.0189076	0.0666258	1	2790	tags=28%, list=12%, signal=31%
REACTOME_OXIDATIVE_STRESS_INDUCED_SENESCENCE	REACTOME_OXIDATIVE_STRESS_INDUCED_SENESCENCE		64	0.37828	1.51246	0.0162933	0.0666864	1	3948	tags=31%, list=17%, signal=37%
REACTOME_RESPONSE_TO_ELEVATED_PLATELET_CYTOSOLIC_CA2	REACTOME_RESPONSE_TO_ELEVATED_PLATELET_CYTOSOLIC_CA2		120	0.340256	1.51219	0.00649351	0.0665459	1	5232	tags=35%, list=22%, signal=45%
REACTOME_HEME_SIGNALING	REACTOME_HEME_SIGNALING		47	0.398611	1.51148	0.018711	0.0666493	1	5946	tags=53%, list=25%, signal=71%
REACTOME_SIGNALING_BY_PTK6	REACTOME_SIGNALING_BY_PTK6		54	0.387721	1.50887	0.0090703	0.0676028	1	4107	tags=37%, list=18%, signal=45%
REACTOME_SEMA4D_IN_SEMAPHORIN_SIGNALING	REACTOME_SEMA4D_IN_SEMAPHORIN_SIGNALING		24	0.471663	1.50833	0.0373626	0.0676069	1	5930	tags=58%, list=25%, signal=78%
REACTOME_GAB1_SIGNALOSOME	REACTOME_GAB1_SIGNALOSOME		16	0.518832	1.50692	0.0596708	0.0679547	1	3527	tags=44%, list=15%, signal=51%
REACTOME_RHO_GTPASE_CYCLE	REACTOME_RHO_GTPASE_CYCLE		431	0.288641	1.50656	0	0.0678805	1	4945	tags=30%, list=21%, signal=38%
REACTOME_NEPHRIN_FAMILY_INTERACTIONS	REACTOME_NEPHRIN_FAMILY_INTERACTIONS		21	0.49387	1.5064	0.0379747	0.0677529	1	4800	tags=43%, list=21%, signal=54%
REACTOME_DOWNSTREAM_SIGNALING_OF_ACTIVATED_FGFR2	REACTOME_DOWNSTREAM_SIGNALING_OF_ACTIVATED_FGFR2		23	0.466013	1.50628	0.0387755	0.067579	1	2665	tags=26%, list=11%, signal=29%
REACTOME_JNK_C_JUN_KINASES_PHOSPHORYLATION_AND_ACTIVATION_MEDIATED_BY_ACTIVATED_HUMAN_TAK1	REACTOME_JNK_C_JUN_KINASES_PHOSPHORYLATION_AND_ACTIVATION_MEDIATED_BY_ACTIVATED_HUMAN_TAK1		22	0.475835	1.50444	0.0334029	0.0682947	1	3164	tags=41%, list=14%, signal=47%
REACTOME_G_BETA_GAMMA_SIGNALLING_THROUGH_CDC42	REACTOME_G_BETA_GAMMA_SIGNALLING_THROUGH_CDC42		18	0.50261	1.5043	0.0469083	0.0680733	1	6385	tags=56%, list=27%, signal=76%
KEGG_FC_GAMMA_R_MEDIATED_PHAGOCYTOSIS	KEGG_FC_GAMMA_R_MEDIATED_PHAGOCYTOSIS		94	0.352452	1.50143	0.00425532	0.0693178	1	2979	tags=26%, list=13%, signal=29%
REACTOME_ONCOGENE_INDUCED_SENESCENCE	REACTOME_ONCOGENE_INDUCED_SENESCENCE		33	0.426495	1.50031	0.029703	0.0696575	1	3948	tags=36%, list=17%, signal=44%
REACTOME_ADHERENS_JUNCTIONS_INTERACTIONS	REACTOME_ADHERENS_JUNCTIONS_INTERACTIONS		27	0.462586	1.50003	0.0354167	0.0695367	1	6687	tags=48%, list=29%, signal=67%
REACTOME_AUTOPHAGY	REACTOME_AUTOPHAGY		140	0.330245	1.49931	0.00444444	0.0697042	1	4165	tags=31%, list=18%, signal=38%
REACTOME_BETA_CATENIN_PHOSPHORYLATION_CASCADE	REACTOME_BETA_CATENIN_PHOSPHORYLATION_CASCADE		17	0.503589	1.49763	0.0398406	0.0703139	1	2560	tags=35%, list=11%, signal=40%
KEGG_OLFACTORY_TRANSDUCTION	KEGG_OLFACTORY_TRANSDUCTION		36	0.42572	1.49762	0.0311284	0.0700717	1	5268	tags=42%, list=23%, signal=54%
HALLMARK_ANDROGEN_RESPONSE	HALLMARK_ANDROGEN_RESPONSE		96	0.345737	1.49502	0.0155211	0.0712449	1	3752	tags=27%, list=16%, signal=32%
REACTOME_SIGNALING_BY_INSULIN_RECEPTOR	REACTOME_SIGNALING_BY_INSULIN_RECEPTOR		66	0.369865	1.49501	0.0134529	0.071006	1	3875	tags=29%, list=17%, signal=34%
REACTOME_SIGNALING_BY_BRAF_AND_RAF_FUSIONS	REACTOME_SIGNALING_BY_BRAF_AND_RAF_FUSIONS		61	0.371594	1.49386	0.00656455	0.0713531	1	3194	tags=31%, list=14%, signal=36%
REACTOME_IKK_COMPLEX_RECRUITMENT_MEDIATED_BY_RIP1	REACTOME_IKK_COMPLEX_RECRUITMENT_MEDIATED_BY_RIP1		23	0.46393	1.49171	0.0651261	0.07226	1	3490	tags=35%, list=15%, signal=41%
REACTOME_KERATINIZATION	REACTOME_KERATINIZATION		51	0.388182	1.49143	0.0263158	0.0721341	1	6288	tags=43%, list=27%, signal=59%
REACTOME_NOTCH4_INTRACELLULAR_DOMAIN_REGULATES_TRANSCRIPTION	REACTOME_NOTCH4_INTRACELLULAR_DOMAIN_REGULATES_TRANSCRIPTION		20	0.492373	1.49066	0.0502008	0.0723108	1	6976	tags=65%, list=30%, signal=93%
HALLMARK_UV_RESPONSE_DN	HALLMARK_UV_RESPONSE_DN		139	0.327885	1.49065	0.00224215	0.0720631	1	4711	tags=31%, list=20%, signal=39%
REACTOME_FACTORS_INVOLVED_IN_MEGAKARYOCYTE_DEVELOPMENT_AND_PLATELET_PRODUCTION	REACTOME_FACTORS_INVOLVED_IN_MEGAKARYOCYTE_DEVELOPMENT_AND_PLATELET_PRODUCTION		129	0.326845	1.48772	0.00623701	0.0734813	1	3310	tags=24%, list=14%, signal=28%
REACTOME_MET_PROMOTES_CELL_MOTILITY	REACTOME_MET_PROMOTES_CELL_MOTILITY		40	0.411737	1.48673	0.0237069	0.0736883	1	7001	tags=60%, list=30%, signal=85%
REACTOME_PD_1_SIGNALING	REACTOME_PD_1_SIGNALING		22	0.475639	1.48257	0.0548523	0.0757405	1	6431	tags=64%, list=27%, signal=88%
REACTOME_RESPONSE_OF_MTB_TO_PHAGOCYTOSIS	REACTOME_RESPONSE_OF_MTB_TO_PHAGOCYTOSIS		23	0.464681	1.47881	0.0511364	0.0774449	1	4125	tags=39%, list=18%, signal=47%
REACTOME_CHROMATIN_MODIFYING_ENZYMES	REACTOME_CHROMATIN_MODIFYING_ENZYMES		195	0.309313	1.47878	0.00215983	0.0771928	1	3507	tags=29%, list=15%, signal=34%
REACTOME_TRANSCRIPTIONAL_REGULATION_BY_THE_AP_2_TFAP2_FAMILY_OF_TRANSCRIPTION_FACTORS	REACTOME_TRANSCRIPTIONAL_REGULATION_BY_THE_AP_2_TFAP2_FAMILY_OF_TRANSCRIPTION_FACTORS		33	0.427131	1.47871	0.0414938	0.0770007	1	6942	tags=58%, list=30%, signal=82%
REACTOME_EPHB_MEDIATED_FORWARD_SIGNALING	REACTOME_EPHB_MEDIATED_FORWARD_SIGNALING		41	0.410341	1.47744	0.0390947	0.0774516	1	4757	tags=37%, list=20%, signal=46%
REACTOME_SIGNALING_BY_NUCLEAR_RECEPTORS	REACTOME_SIGNALING_BY_NUCLEAR_RECEPTORS		220	0.305563	1.47684	0	0.0775403	1	5108	tags=34%, list=22%, signal=43%
REACTOME_TRANSCRIPTIONAL_REGULATION_BY_RUNX1	REACTOME_TRANSCRIPTIONAL_REGULATION_BY_RUNX1		172	0.317127	1.47633	0.00420168	0.0775141	1	5148	tags=31%, list=22%, signal=39%
REACTOME_RHOQ_GTPASE_CYCLE	REACTOME_RHOQ_GTPASE_CYCLE		58	0.379558	1.4759	0.0310559	0.0774576	1	4325	tags=38%, list=18%, signal=46%
REACTOME_REGULATION_OF_INSULIN_LIKE_GROWTH_FACTOR_IGF_TRANSPORT_AND_UPTAKE_BY_INSULIN_LIKE_GROWTH_FACTOR_BINDING_PROTEINS_IGFBPS	REACTOME_REGULATION_OF_INSULIN_LIKE_GROWTH_FACTOR_IGF_TRANSPORT_AND_UPTAKE_BY_INSULIN_LIKE_GROWTH_FACTOR_BINDING_PROTEINS_IGFBPS		101	0.341628	1.47466	0.01766	0.0778735	1	7653	tags=53%, list=33%, signal=79%
REACTOME_PI3K_EVENTS_IN_ERBB2_SIGNALING	REACTOME_PI3K_EVENTS_IN_ERBB2_SIGNALING		16	0.505747	1.47241	0.0585859	0.0790109	1	4856	tags=50%, list=21%, signal=63%
KEGG_THYROID_CANCER	KEGG_THYROID_CANCER		29	0.447979	1.46695	0.0347072	0.0819407	1	3235	tags=34%, list=14%, signal=40%
REACTOME_GRB2_EVENTS_IN_ERBB2_SIGNALING	REACTOME_GRB2_EVENTS_IN_ERBB2_SIGNALING		16	0.512919	1.46681	0.072	0.0817622	1	1836	tags=31%, list=8%, signal=34%
REACTOME_ASSEMBLY_AND_CELL_SURFACE_PRESENTATION_OF_NMDA_RECEPTORS	REACTOME_ASSEMBLY_AND_CELL_SURFACE_PRESENTATION_OF_NMDA_RECEPTORS		39	0.413042	1.46455	0.0251046	0.0827869	1	2378	tags=23%, list=10%, signal=26%
REACTOME_GABA_RECEPTOR_ACTIVATION	REACTOME_GABA_RECEPTOR_ACTIVATION		53	0.378457	1.46444	0.0185567	0.0825986	1	6454	tags=43%, list=28%, signal=60%
REACTOME_TRANS_GOLGI_NETWORK_VESICLE_BUDDING	REACTOME_TRANS_GOLGI_NETWORK_VESICLE_BUDDING		71	0.357256	1.46093	0.0299145	0.0842588	1	3222	tags=27%, list=14%, signal=31%
REACTOME_ECM_PROTEOGLYCANS	REACTOME_ECM_PROTEOGLYCANS		72	0.359341	1.45995	0.0285714	0.084652	1	7001	tags=46%, list=30%, signal=65%
KEGG_AXON_GUIDANCE	KEGG_AXON_GUIDANCE		121	0.323368	1.45895	0.00657895	0.0849213	1	3386	tags=24%, list=14%, signal=28%
KEGG_ENDOCYTOSIS	KEGG_ENDOCYTOSIS		174	0.310267	1.45811	0.00626305	0.0851008	1	4670	tags=30%, list=20%, signal=38%
HALLMARK_PI3K_AKT_MTOR_SIGNALING	HALLMARK_PI3K_AKT_MTOR_SIGNALING		99	0.333636	1.45661	0.0125	0.0856501	1	2784	tags=23%, list=12%, signal=26%
REACTOME_DISEASES_OF_SIGNAL_TRANSDUCTION_BY_GROWTH_FACTOR_RECEPTORS_AND_SECOND_MESSENGERS	REACTOME_DISEASES_OF_SIGNAL_TRANSDUCTION_BY_GROWTH_FACTOR_RECEPTORS_AND_SECOND_MESSENGERS		372	0.285549	1.4555	0	0.0859928	1	3235	tags=22%, list=14%, signal=25%
REACTOME_NOD1_2_SIGNALING_PATHWAY	REACTOME_NOD1_2_SIGNALING_PATHWAY		36	0.418364	1.4551	0.0377359	0.0860206	1	3741	tags=39%, list=16%, signal=46%
REACTOME_C_TYPE_LECTIN_RECEPTORS_CLRS	REACTOME_C_TYPE_LECTIN_RECEPTORS_CLRS		134	0.324889	1.45486	0.00638298	0.0858774	1	4421	tags=28%, list=19%, signal=35%
REACTOME_RIPK1_MEDIATED_REGULATED_NECROSIS	REACTOME_RIPK1_MEDIATED_REGULATED_NECROSIS		29	0.435559	1.45363	0.0540541	0.086365	1	3968	tags=38%, list=17%, signal=46%
REACTOME_RAC2_GTPASE_CYCLE	REACTOME_RAC2_GTPASE_CYCLE		86	0.345033	1.45252	0.00614754	0.0866918	1	6304	tags=47%, list=27%, signal=63%
REACTOME_TICAM1_RIP1_MEDIATED_IKK_COMPLEX_RECRUITMENT	REACTOME_TICAM1_RIP1_MEDIATED_IKK_COMPLEX_RECRUITMENT		19	0.482372	1.45207	0.0507812	0.0867248	1	3164	tags=37%, list=14%, signal=43%
REACTOME_RHOB_GTPASE_CYCLE	REACTOME_RHOB_GTPASE_CYCLE		68	0.359921	1.45182	0.0179372	0.0865896	1	6061	tags=46%, list=26%, signal=61%
REACTOME_TRAF6_MEDIATED_INDUCTION_OF_TAK1_COMPLEX_WITHIN_TLR4_COMPLEX	REACTOME_TRAF6_MEDIATED_INDUCTION_OF_TAK1_COMPLEX_WITHIN_TLR4_COMPLEX		16	0.502047	1.44981	0.0572597	0.0875615	1	3490	tags=44%, list=15%, signal=51%
REACTOME_OTHER_INTERLEUKIN_SIGNALING	REACTOME_OTHER_INTERLEUKIN_SIGNALING		24	0.453339	1.44619	0.0609244	0.0895041	1	3318	tags=38%, list=14%, signal=44%
REACTOME_SIGNALING_BY_BMP	REACTOME_SIGNALING_BY_BMP		22	0.460858	1.44559	0.059322	0.0896164	1	2344	tags=27%, list=10%, signal=30%
REACTOME_SEROTONIN_NEUROTRANSMITTER_RELEASE_CYCLE	REACTOME_SEROTONIN_NEUROTRANSMITTER_RELEASE_CYCLE		17	0.494103	1.44529	0.0601942	0.0895105	1	2731	tags=29%, list=12%, signal=33%
REACTOME_SIGNALING_BY_CTNNB1_PHOSPHO_SITE_MUTANTS	REACTOME_SIGNALING_BY_CTNNB1_PHOSPHO_SITE_MUTANTS		15	0.514587	1.44399	0.0579399	0.0899348	1	2560	tags=40%, list=11%, signal=45%
REACTOME_RHOA_GTPASE_CYCLE	REACTOME_RHOA_GTPASE_CYCLE		145	0.314385	1.44256	0.0104822	0.0904978	1	4739	tags=32%, list=20%, signal=40%
REACTOME_FOXO_MEDIATED_TRANSCRIPTION_OF_CELL_DEATH_GENES	REACTOME_FOXO_MEDIATED_TRANSCRIPTION_OF_CELL_DEATH_GENES		16	0.501736	1.44002	0.0691057	0.0917843	1	3926	tags=50%, list=17%, signal=60%
REACTOME_NGF_STIMULATED_TRANSCRIPTION	REACTOME_NGF_STIMULATED_TRANSCRIPTION		37	0.403629	1.43599	0.039501	0.0938824	1	2668	tags=32%, list=11%, signal=37%
REACTOME_AMYLOID_FIBER_FORMATION	REACTOME_AMYLOID_FIBER_FORMATION		39	0.399271	1.4323	0.0481928	0.0957791	1	5170	tags=38%, list=22%, signal=49%
REACTOME_MAP2K_AND_MAPK_ACTIVATION	REACTOME_MAP2K_AND_MAPK_ACTIVATION		37	0.405022	1.43045	0.0458515	0.0966745	1	4165	tags=32%, list=18%, signal=39%
REACTOME_RIP_MEDIATED_NFKB_ACTIVATION_VIA_ZBP1	REACTOME_RIP_MEDIATED_NFKB_ACTIVATION_VIA_ZBP1		17	0.487729	1.42843	0.0685841	0.0976773	1	1776	tags=35%, list=8%, signal=38%
REACTOME_CDC42_GTPASE_CYCLE	REACTOME_CDC42_GTPASE_CYCLE		156	0.30737	1.42782	0.00835073	0.0978534	1	4739	tags=30%, list=20%, signal=38%
REACTOME_RHOC_GTPASE_CYCLE	REACTOME_RHOC_GTPASE_CYCLE		71	0.354819	1.42649	0.0350515	0.0984156	1	4710	tags=38%, list=20%, signal=47%
REACTOME_CELL_SURFACE_INTERACTIONS_AT_THE_VASCULAR_WALL	REACTOME_CELL_SURFACE_INTERACTIONS_AT_THE_VASCULAR_WALL		178	0.303693	1.42628	0.00623701	0.0982431	1	3664	tags=19%, list=16%, signal=22%
REACTOME_NEGATIVE_REGULATORS_OF_DDX58_IFIH1_SIGNALING	REACTOME_NEGATIVE_REGULATORS_OF_DDX58_IFIH1_SIGNALING		34	0.410321	1.42461	0.0420842	0.0990051	1	5344	tags=50%, list=23%, signal=65%
REACTOME_COLLAGEN_BIOSYNTHESIS_AND_MODIFYING_ENZYMES	REACTOME_COLLAGEN_BIOSYNTHESIS_AND_MODIFYING_ENZYMES		66	0.35663	1.42439	0.0387755	0.098867	1	8476	tags=56%, list=36%, signal=88%
REACTOME_SIGNALING_BY_FGFR2	REACTOME_SIGNALING_BY_FGFR2		65	0.355414	1.42373	0.025641	0.0990483	1	3164	tags=25%, list=14%, signal=28%
REACTOME_PRESYNAPTIC_FUNCTION_OF_KAINATE_RECEPTORS	REACTOME_PRESYNAPTIC_FUNCTION_OF_KAINATE_RECEPTORS		18	0.476398	1.42225	0.0821355	0.0998168	1	6385	tags=50%, list=27%, signal=69%
REACTOME_RAF_INDEPENDENT_MAPK1_3_ACTIVATION	REACTOME_RAF_INDEPENDENT_MAPK1_3_ACTIVATION		22	0.456243	1.42019	0.0743243	0.100826	1	2773	tags=27%, list=12%, signal=31%
REACTOME_DOPAMINE_NEUROTRANSMITTER_RELEASE_CYCLE	REACTOME_DOPAMINE_NEUROTRANSMITTER_RELEASE_CYCLE		22	0.452801	1.41995	0.0687361	0.100677	1	2731	tags=27%, list=12%, signal=31%
REACTOME_ANTIMICROBIAL_PEPTIDES	REACTOME_ANTIMICROBIAL_PEPTIDES		39	0.388589	1.41908	0.063655	0.100998	1	6055	tags=49%, list=26%, signal=66%
REACTOME_INTRACELLULAR_SIGNALING_BY_SECOND_MESSENGERS	REACTOME_INTRACELLULAR_SIGNALING_BY_SECOND_MESSENGERS		291	0.283268	1.41715	0	0.101982	1	4918	tags=31%, list=21%, signal=38%
REACTOME_RAB_GERANYLGERANYLATION	REACTOME_RAB_GERANYLGERANYLATION		63	0.351845	1.41568	0.0293501	0.102633	1	4187	tags=33%, list=18%, signal=40%
REACTOME_SIGNALING_BY_FGFR	REACTOME_SIGNALING_BY_FGFR		78	0.339389	1.41556	0.0348028	0.102412	1	3164	tags=23%, list=14%, signal=27%
REACTOME_PEPTIDE_HORMONE_METABOLISM	REACTOME_PEPTIDE_HORMONE_METABOLISM		66	0.350192	1.41548	0.0449898	0.102169	1	3804	tags=30%, list=16%, signal=36%
REACTOME_ZBP1_DAI_MEDIATED_INDUCTION_OF_TYPE_I_IFNS	REACTOME_ZBP1_DAI_MEDIATED_INDUCTION_OF_TYPE_I_IFNS		21	0.446908	1.41172	0.0703625	0.104276	1	4926	tags=57%, list=21%, signal=72%
KEGG_TGF_BETA_SIGNALING_PATHWAY	KEGG_TGF_BETA_SIGNALING_PATHWAY		80	0.338802	1.40946	0.0354906	0.105602	1	3838	tags=30%, list=16%, signal=36%
REACTOME_NON_INTEGRIN_MEMBRANE_ECM_INTERACTIONS	REACTOME_NON_INTEGRIN_MEMBRANE_ECM_INTERACTIONS		58	0.357192	1.40742	0.0371134	0.106682	1	5541	tags=40%, list=24%, signal=52%
REACTOME_G_PROTEIN_BETA_GAMMA_SIGNALLING	REACTOME_G_PROTEIN_BETA_GAMMA_SIGNALLING		30	0.415817	1.4044	0.043573	0.108515	1	6385	tags=47%, list=27%, signal=64%
REACTOME_CLATHRIN_MEDIATED_ENDOCYTOSIS	REACTOME_CLATHRIN_MEDIATED_ENDOCYTOSIS		136	0.308429	1.39952	0.0235043	0.111459	1	3903	tags=26%, list=17%, signal=31%
REACTOME_LEISHMANIA_INFECTION	REACTOME_LEISHMANIA_INFECTION		266	0.284457	1.39823	0.00419287	0.112029	1	5179	tags=28%, list=22%, signal=35%
REACTOME_RHOG_GTPASE_CYCLE	REACTOME_RHOG_GTPASE_CYCLE		72	0.343443	1.39822	0.031746	0.111729	1	5267	tags=39%, list=23%, signal=50%
REACTOME_TRANSLOCATION_OF_SLC2A4_GLUT4_TO_THE_PLASMA_MEMBRANE	REACTOME_TRANSLOCATION_OF_SLC2A4_GLUT4_TO_THE_PLASMA_MEMBRANE		66	0.349915	1.39528	0.0323887	0.113572	1	3903	tags=35%, list=17%, signal=42%
REACTOME_TRAF6_MEDIATED_IRF7_ACTIVATION	REACTOME_TRAF6_MEDIATED_IRF7_ACTIVATION		16	0.485007	1.39472	0.0867769	0.113619	1	2081	tags=38%, list=9%, signal=41%
REACTOME_REGULATION_OF_KIT_SIGNALING	REACTOME_REGULATION_OF_KIT_SIGNALING		16	0.486487	1.3907	0.103239	0.116305	1	2574	tags=31%, list=11%, signal=35%
REACTOME_ACTIVATION_OF_NMDA_RECEPTORS_AND_POSTSYNAPTIC_EVENTS	REACTOME_ACTIVATION_OF_NMDA_RECEPTORS_AND_POSTSYNAPTIC_EVENTS		86	0.328311	1.38963	0.0411255	0.116837	1	4379	tags=26%, list=19%, signal=31%
KEGG_NITROGEN_METABOLISM	KEGG_NITROGEN_METABOLISM		19	0.451303	1.38908	0.0808511	0.116925	1	5187	tags=47%, list=22%, signal=61%
KEGG_TIGHT_JUNCTION	KEGG_TIGHT_JUNCTION		117	0.313698	1.38901	0.0321888	0.116635	1	4641	tags=27%, list=20%, signal=34%
REACTOME_MAPK_FAMILY_SIGNALING_CASCADES	REACTOME_MAPK_FAMILY_SIGNALING_CASCADES		301	0.275366	1.38471	0.00223714	0.11959	1	4421	tags=24%, list=19%, signal=29%
REACTOME_PKMTS_METHYLATE_HISTONE_LYSINES	REACTOME_PKMTS_METHYLATE_HISTONE_LYSINES		38	0.388559	1.38413	0.0702128	0.119706	1	3507	tags=39%, list=15%, signal=46%
REACTOME_HSF1_DEPENDENT_TRANSACTIVATION	REACTOME_HSF1_DEPENDENT_TRANSACTIVATION		35	0.387453	1.38263	0.0683761	0.120534	1	4379	tags=40%, list=19%, signal=49%
REACTOME_CELLULAR_SENESCENCE	REACTOME_CELLULAR_SENESCENCE		128	0.304485	1.38125	0.0254777	0.121259	1	3602	tags=27%, list=15%, signal=32%
REACTOME_GLYCOSPHINGOLIPID_METABOLISM	REACTOME_GLYCOSPHINGOLIPID_METABOLISM		41	0.387662	1.3807	0.060166	0.121375	1	2716	tags=24%, list=12%, signal=28%
REACTOME_SIGNALING_BY_VEGF	REACTOME_SIGNALING_BY_VEGF		104	0.321356	1.37754	0.0244444	0.123562	1	4376	tags=30%, list=19%, signal=37%
REACTOME_NUCLEAR_EVENTS_KINASE_AND_TRANSCRIPTION_FACTOR_ACTIVATION	REACTOME_NUCLEAR_EVENTS_KINASE_AND_TRANSCRIPTION_FACTOR_ACTIVATION		59	0.348977	1.37308	0.0421053	0.126788	1	2668	tags=27%, list=11%, signal=31%
KEGG_ARRHYTHMOGENIC_RIGHT_VENTRICULAR_CARDIOMYOPATHY_ARVC	KEGG_ARRHYTHMOGENIC_RIGHT_VENTRICULAR_CARDIOMYOPATHY_ARVC		67	0.333338	1.37086	0.0443975	0.128183	1	6288	tags=36%, list=27%, signal=49%
REACTOME_NOTCH3_INTRACELLULAR_DOMAIN_REGULATES_TRANSCRIPTION	REACTOME_NOTCH3_INTRACELLULAR_DOMAIN_REGULATES_TRANSCRIPTION		24	0.424196	1.37055	0.0869565	0.128133	1	6976	tags=50%, list=30%, signal=71%
REACTOME_REGULATION_OF_TP53_ACTIVITY_THROUGH_ACETYLATION	REACTOME_REGULATION_OF_TP53_ACTIVITY_THROUGH_ACETYLATION		29	0.40108	1.36778	0.0912951	0.130038	1	2359	tags=31%, list=10%, signal=34%
REACTOME_MET_ACTIVATES_PTK2_SIGNALING	REACTOME_MET_ACTIVATES_PTK2_SIGNALING		30	0.397647	1.36763	0.0722892	0.129781	1	7001	tags=57%, list=30%, signal=81%
REACTOME_FRS_MEDIATED_FGFR2_SIGNALING	REACTOME_FRS_MEDIATED_FGFR2_SIGNALING		18	0.465944	1.36762	0.104723	0.129444	1	1836	tags=22%, list=8%, signal=24%
REACTOME_PI_3K_CASCADE_FGFR2	REACTOME_PI_3K_CASCADE_FGFR2		16	0.475278	1.36704	0.092437	0.129647	1	6530	tags=50%, list=28%, signal=69%
KEGG_NON_SMALL_CELL_LUNG_CANCER	KEGG_NON_SMALL_CELL_LUNG_CANCER		54	0.356639	1.36583	0.0442656	0.130221	1	3602	tags=30%, list=15%, signal=35%
REACTOME_CELLULAR_RESPONSE_TO_HEAT_STRESS	REACTOME_CELLULAR_RESPONSE_TO_HEAT_STRESS		96	0.315429	1.36344	0.030426	0.131811	1	3945	tags=35%, list=17%, signal=42%
REACTOME_SIGNALING_BY_NOTCH3	REACTOME_SIGNALING_BY_NOTCH3		48	0.361226	1.36314	0.0708333	0.13166	1	5455	tags=35%, list=23%, signal=46%
REACTOME_APOPTOTIC_CLEAVAGE_OF_CELLULAR_PROTEINS	REACTOME_APOPTOTIC_CLEAVAGE_OF_CELLULAR_PROTEINS		36	0.38785	1.36234	0.0788913	0.131901	1	3713	tags=31%, list=16%, signal=36%
REACTOME_NCAM_SIGNALING_FOR_NEURITE_OUT_GROWTH	REACTOME_NCAM_SIGNALING_FOR_NEURITE_OUT_GROWTH		60	0.349483	1.36181	0.0490405	0.131963	1	4950	tags=33%, list=21%, signal=42%
REACTOME_MRNA_SPLICING	REACTOME_MRNA_SPLICING		187	0.289152	1.36145	0.0204545	0.131981	1	3738	tags=28%, list=16%, signal=33%
KEGG_ECM_RECEPTOR_INTERACTION	KEGG_ECM_RECEPTOR_INTERACTION		83	0.321512	1.36113	0.0342742	0.131971	1	7001	tags=42%, list=30%, signal=60%
KEGG_BLADDER_CANCER	KEGG_BLADDER_CANCER		41	0.374343	1.3611	0.0660793	0.131641	1	2250	tags=24%, list=10%, signal=27%
REACTOME_L1CAM_INTERACTIONS	REACTOME_L1CAM_INTERACTIONS		110	0.310496	1.35849	0.0282828	0.13359	1	2421	tags=17%, list=10%, signal=19%
REACTOME_BLOOD_GROUP_SYSTEMS_BIOSYNTHESIS	REACTOME_BLOOD_GROUP_SYSTEMS_BIOSYNTHESIS		20	0.442309	1.35834	0.0930233	0.133392	1	3426	tags=40%, list=15%, signal=47%
REACTOME_PROCESSING_OF_CAPPED_INTRON_CONTAINING_PRE_MRNA	REACTOME_PROCESSING_OF_CAPPED_INTRON_CONTAINING_PRE_MRNA		240	0.275783	1.35325	0.00649351	0.137272	1	3791	tags=28%, list=16%, signal=33%
REACTOME_ELASTIC_FIBRE_FORMATION	REACTOME_ELASTIC_FIBRE_FORMATION		43	0.367653	1.35171	0.0704225	0.138195	1	2588	tags=23%, list=11%, signal=26%
REACTOME_DEREGULATED_CDK5_TRIGGERS_MULTIPLE_NEURODEGENERATIVE_PATHWAYS_IN_ALZHEIMER_S_DISEASE_MODELS	REACTOME_DEREGULATED_CDK5_TRIGGERS_MULTIPLE_NEURODEGENERATIVE_PATHWAYS_IN_ALZHEIMER_S_DISEASE_MODELS		22	0.432841	1.35083	0.0828157	0.138653	1	3048	tags=36%, list=13%, signal=42%
REACTOME_SIGNALING_BY_WNT_IN_CANCER	REACTOME_SIGNALING_BY_WNT_IN_CANCER		32	0.391205	1.34956	0.0718954	0.139419	1	3235	tags=31%, list=14%, signal=36%
REACTOME_SHC1_EVENTS_IN_ERBB2_SIGNALING	REACTOME_SHC1_EVENTS_IN_ERBB2_SIGNALING		22	0.427741	1.34716	0.126411	0.141157	1	4641	tags=41%, list=20%, signal=51%
REACTOME_PI_METABOLISM	REACTOME_PI_METABOLISM		82	0.318921	1.34404	0.0462185	0.143549	1	2928	tags=26%, list=13%, signal=29%
REACTOME_MHC_CLASS_II_ANTIGEN_PRESENTATION	REACTOME_MHC_CLASS_II_ANTIGEN_PRESENTATION		115	0.303791	1.34351	0.0294118	0.143703	1	3475	tags=24%, list=15%, signal=28%
KEGG_MELANOMA	KEGG_MELANOMA		62	0.340299	1.34242	0.0567227	0.144247	1	6530	tags=47%, list=28%, signal=65%
REACTOME_NUCLEAR_ENVELOPE_NE_REASSEMBLY	REACTOME_NUCLEAR_ENVELOPE_NE_REASSEMBLY		71	0.331257	1.34134	0.0672451	0.144889	1	2378	tags=25%, list=10%, signal=28%
REACTOME_RHOU_GTPASE_CYCLE	REACTOME_RHOU_GTPASE_CYCLE		34	0.384742	1.33777	0.0885312	0.147682	1	5267	tags=41%, list=23%, signal=53%
REACTOME_REGULATION_OF_HSF1_MEDIATED_HEAT_SHOCK_RESPONSE	REACTOME_REGULATION_OF_HSF1_MEDIATED_HEAT_SHOCK_RESPONSE		77	0.324179	1.33691	0.0438413	0.148063	1	3791	tags=38%, list=16%, signal=45%
REACTOME_INFLAMMASOMES	REACTOME_INFLAMMASOMES		21	0.436782	1.33619	0.107438	0.148329	1	4989	tags=43%, list=21%, signal=54%
REACTOME_TRANSMISSION_ACROSS_CHEMICAL_SYNAPSES	REACTOME_TRANSMISSION_ACROSS_CHEMICAL_SYNAPSES		230	0.276641	1.33436	0.0106157	0.149622	1	6454	tags=32%, list=28%, signal=43%
REACTOME_NUCLEAR_SIGNALING_BY_ERBB4	REACTOME_NUCLEAR_SIGNALING_BY_ERBB4		31	0.395377	1.33411	0.105155	0.149458	1	6893	tags=52%, list=29%, signal=73%
REACTOME_CA2_PATHWAY	REACTOME_CA2_PATHWAY		60	0.34185	1.33262	0.0681319	0.150529	1	3645	tags=27%, list=16%, signal=32%
REACTOME_ADORA2B_MEDIATED_ANTI_INFLAMMATORY_CYTOKINES_PRODUCTION	REACTOME_ADORA2B_MEDIATED_ANTI_INFLAMMATORY_CYTOKINES_PRODUCTION		92	0.315118	1.33113	0.0692308	0.151508	1	5398	tags=32%, list=23%, signal=41%
REACTOME_DEPOLYMERISATION_OF_THE_NUCLEAR_LAMINA	REACTOME_DEPOLYMERISATION_OF_THE_NUCLEAR_LAMINA		15	0.457579	1.33083	0.129103	0.151419	1	4846	tags=33%, list=21%, signal=42%
REACTOME_SENSORY_PROCESSING_OF_SOUND	REACTOME_SENSORY_PROCESSING_OF_SOUND		67	0.333148	1.3296	0.0761099	0.152239	1	6927	tags=40%, list=30%, signal=57%
KEGG_SPLICEOSOME	KEGG_SPLICEOSOME		126	0.296862	1.32896	0.0265849	0.152457	1	3738	tags=29%, list=16%, signal=35%
REACTOME_RUNX1_INTERACTS_WITH_CO_FACTORS_WHOSE_PRECISE_EFFECT_ON_RUNX1_TARGETS_IS_NOT_KNOWN	REACTOME_RUNX1_INTERACTS_WITH_CO_FACTORS_WHOSE_PRECISE_EFFECT_ON_RUNX1_TARGETS_IS_NOT_KNOWN		36	0.378336	1.32706	0.0958333	0.153973	1	3938	tags=33%, list=17%, signal=40%
REACTOME_G_ALPHA_Z_SIGNALLING_EVENTS	REACTOME_G_ALPHA_Z_SIGNALLING_EVENTS		42	0.369231	1.32683	0.0677618	0.153803	1	6966	tags=48%, list=30%, signal=68%
KEGG_GLIOMA	KEGG_GLIOMA		63	0.331726	1.32679	0.0584551	0.153448	1	5001	tags=33%, list=21%, signal=42%
REACTOME_TNF_SIGNALING	REACTOME_TNF_SIGNALING		43	0.359663	1.32507	0.0785124	0.154662	1	4281	tags=40%, list=18%, signal=48%
REACTOME_CD28_DEPENDENT_PI3K_AKT_SIGNALING	REACTOME_CD28_DEPENDENT_PI3K_AKT_SIGNALING		22	0.423501	1.32445	0.0942184	0.154901	1	2665	tags=27%, list=11%, signal=31%
REACTOME_CELL_CELL_JUNCTION_ORGANIZATION	REACTOME_CELL_CELL_JUNCTION_ORGANIZATION		49	0.351208	1.32424	0.0769231	0.154695	1	7276	tags=45%, list=31%, signal=65%
REACTOME_RHOV_GTPASE_CYCLE	REACTOME_RHOV_GTPASE_CYCLE		32	0.381774	1.32387	0.0909091	0.154684	1	2093	tags=22%, list=9%, signal=24%
REACTOME_VASOPRESSIN_REGULATES_RENAL_WATER_HOMEOSTASIS_VIA_AQUAPORINS	REACTOME_VASOPRESSIN_REGULATES_RENAL_WATER_HOMEOSTASIS_VIA_AQUAPORINS		37	0.377399	1.32262	0.117895	0.15549	1	6385	tags=46%, list=27%, signal=63%
REACTOME_ACTIVATION_OF_IRF3_IRF7_MEDIATED_BY_TBK1_IKK_EPSILON	REACTOME_ACTIVATION_OF_IRF3_IRF7_MEDIATED_BY_TBK1_IKK_EPSILON		17	0.446383	1.32066	0.13442	0.156979	1	7084	tags=59%, list=30%, signal=84%
REACTOME_INTRINSIC_PATHWAY_FOR_APOPTOSIS	REACTOME_INTRINSIC_PATHWAY_FOR_APOPTOSIS		53	0.340883	1.31607	0.0857143	0.160835	1	3602	tags=38%, list=15%, signal=45%
REACTOME_REGULATION_OF_RUNX1_EXPRESSION_AND_ACTIVITY	REACTOME_REGULATION_OF_RUNX1_EXPRESSION_AND_ACTIVITY		17	0.444685	1.31274	0.126609	0.163651	1	8040	tags=65%, list=34%, signal=99%
KEGG_AMYOTROPHIC_LATERAL_SCLEROSIS_ALS	KEGG_AMYOTROPHIC_LATERAL_SCLEROSIS_ALS		49	0.3502	1.31118	0.0884211	0.164833	1	1961	tags=20%, list=8%, signal=22%
REACTOME_KINESINS	REACTOME_KINESINS		52	0.347637	1.30876	0.0940171	0.16677	1	2378	tags=17%, list=10%, signal=19%
HALLMARK_ESTROGEN_RESPONSE_LATE	HALLMARK_ESTROGEN_RESPONSE_LATE		188	0.274308	1.30447	0.0317125	0.170819	1	5203	tags=30%, list=22%, signal=38%
REACTOME_RHO_GTPASE_EFFECTORS	REACTOME_RHO_GTPASE_EFFECTORS		248	0.26529	1.30409	0.0165975	0.170738	1	4027	tags=26%, list=17%, signal=31%
KEGG_RIG_I_LIKE_RECEPTOR_SIGNALING_PATHWAY	KEGG_RIG_I_LIKE_RECEPTOR_SIGNALING_PATHWAY		55	0.335227	1.30203	0.0769231	0.172506	1	2081	tags=25%, list=9%, signal=28%
HALLMARK_XENOBIOTIC_METABOLISM	HALLMARK_XENOBIOTIC_METABOLISM		179	0.277248	1.30138	0.0293501	0.172842	1	4719	tags=28%, list=20%, signal=35%
REACTOME_SUMOYLATION_OF_DNA_METHYLATION_PROTEINS	REACTOME_SUMOYLATION_OF_DNA_METHYLATION_PROTEINS		16	0.457028	1.30028	0.13347	0.173481	1	3469	tags=31%, list=15%, signal=37%
REACTOME_DNA_DOUBLE_STRAND_BREAK_RESPONSE	REACTOME_DNA_DOUBLE_STRAND_BREAK_RESPONSE		40	0.355762	1.29889	0.103814	0.174622	1	3365	tags=35%, list=14%, signal=41%
REACTOME_TP53_REGULATES_TRANSCRIPTION_OF_GENES_INVOLVED_IN_CYTOCHROME_C_RELEASE	REACTOME_TP53_REGULATES_TRANSCRIPTION_OF_GENES_INVOLVED_IN_CYTOCHROME_C_RELEASE		19	0.435797	1.29754	0.139875	0.175618	1	2113	tags=26%, list=9%, signal=29%
REACTOME_REGULATION_OF_INSULIN_SECRETION	REACTOME_REGULATION_OF_INSULIN_SECRETION		67	0.320722	1.29749	0.0840517	0.175263	1	4213	tags=25%, list=18%, signal=31%
REACTOME_TRAF6_MEDIATED_NF_KB_ACTIVATION	REACTOME_TRAF6_MEDIATED_NF_KB_ACTIVATION		23	0.4055	1.29621	0.144898	0.176225	1	3111	tags=35%, list=13%, signal=40%
REACTOME_SUMOYLATION_OF_TRANSCRIPTION_FACTORS	REACTOME_SUMOYLATION_OF_TRANSCRIPTION_FACTORS		18	0.441259	1.29618	0.146091	0.175846	1	2319	tags=28%, list=10%, signal=31%
REACTOME_SENSORY_PERCEPTION	REACTOME_SENSORY_PERCEPTION		161	0.278472	1.29616	0.0314465	0.175447	1	6582	tags=36%, list=28%, signal=50%
REACTOME_RHOD_GTPASE_CYCLE	REACTOME_RHOD_GTPASE_CYCLE		50	0.342661	1.29446	0.118644	0.176718	1	4846	tags=34%, list=21%, signal=43%
REACTOME_NUCLEAR_RECEPTOR_TRANSCRIPTION_PATHWAY	REACTOME_NUCLEAR_RECEPTOR_TRANSCRIPTION_PATHWAY		49	0.343626	1.29329	0.115942	0.177544	1	2553	tags=24%, list=11%, signal=27%
REACTOME_O_LINKED_GLYCOSYLATION_OF_MUCINS	REACTOME_O_LINKED_GLYCOSYLATION_OF_MUCINS		56	0.332083	1.29226	0.104034	0.178207	1	4262	tags=29%, list=18%, signal=35%
REACTOME_NEUROTRANSMITTER_RECEPTORS_AND_POSTSYNAPTIC_SIGNAL_TRANSMISSION	REACTOME_NEUROTRANSMITTER_RECEPTORS_AND_POSTSYNAPTIC_SIGNAL_TRANSMISSION		173	0.275675	1.2875	0.0285132	0.18313	1	6454	tags=33%, list=28%, signal=45%
KEGG_SNARE_INTERACTIONS_IN_VESICULAR_TRANSPORT	KEGG_SNARE_INTERACTIONS_IN_VESICULAR_TRANSPORT		38	0.357467	1.28625	0.109562	0.183937	1	1440	tags=24%, list=6%, signal=25%
REACTOME_INTERLEUKIN_7_SIGNALING	REACTOME_INTERLEUKIN_7_SIGNALING		22	0.410156	1.28402	0.140756	0.185934	1	6393	tags=50%, list=27%, signal=69%
REACTOME_AQUAPORIN_MEDIATED_TRANSPORT	REACTOME_AQUAPORIN_MEDIATED_TRANSPORT		41	0.353196	1.28121	0.134454	0.188531	1	6385	tags=44%, list=27%, signal=60%
REACTOME_HATS_ACETYLATE_HISTONES	REACTOME_HATS_ACETYLATE_HISTONES		78	0.307994	1.28109	0.0982659	0.188235	1	2172	tags=23%, list=9%, signal=25%
REACTOME_ANCHORING_FIBRIL_FORMATION	REACTOME_ANCHORING_FIBRIL_FORMATION		15	0.454007	1.28045	0.167677	0.188469	1	4684	tags=33%, list=20%, signal=42%
KEGG_MELANOGENESIS	KEGG_MELANOGENESIS		90	0.302476	1.27946	0.0686695	0.189141	1	4515	tags=29%, list=19%, signal=36%
REACTOME_LATE_ENDOSOMAL_MICROAUTOPHAGY	REACTOME_LATE_ENDOSOMAL_MICROAUTOPHAGY		32	0.374559	1.2775	0.129897	0.19085	1	4091	tags=34%, list=17%, signal=42%
REACTOME_G_ALPHA_S_SIGNALLING_EVENTS	REACTOME_G_ALPHA_S_SIGNALLING_EVENTS		101	0.293979	1.27689	0.0881148	0.191112	1	3645	tags=23%, list=16%, signal=27%
REACTOME_GLUCAGON_TYPE_LIGAND_RECEPTORS	REACTOME_GLUCAGON_TYPE_LIGAND_RECEPTORS		25	0.387003	1.27574	0.132632	0.192012	1	6643	tags=48%, list=28%, signal=67%
KEGG_HYPERTROPHIC_CARDIOMYOPATHY_HCM	KEGG_HYPERTROPHIC_CARDIOMYOPATHY_HCM		73	0.308091	1.27335	0.0893617	0.194132	1	2588	tags=18%, list=11%, signal=20%
REACTOME_OPIOID_SIGNALLING	REACTOME_OPIOID_SIGNALLING		81	0.306502	1.26587	0.100209	0.202435	1	5268	tags=35%, list=23%, signal=44%
REACTOME_RHO_GTPASES_ACTIVATE_WASPS_AND_WAVES	REACTOME_RHO_GTPASES_ACTIVATE_WASPS_AND_WAVES		36	0.358678	1.26196	0.141372	0.206483	1	5068	tags=39%, list=22%, signal=50%
REACTOME_SUMOYLATION	REACTOME_SUMOYLATION		167	0.270838	1.2617	0.0602911	0.20635	1	2496	tags=20%, list=11%, signal=23%
REACTOME_SYNDECAN_INTERACTIONS	REACTOME_SYNDECAN_INTERACTIONS		27	0.383684	1.26167	0.155925	0.205898	1	3893	tags=33%, list=17%, signal=40%
REACTOME_ACTIVATION_OF_KAINATE_RECEPTORS_UPON_GLUTAMATE_BINDING	REACTOME_ACTIVATION_OF_KAINATE_RECEPTORS_UPON_GLUTAMATE_BINDING		26	0.383508	1.26106	0.163265	0.206096	1	6385	tags=42%, list=27%, signal=58%
REACTOME_IMMUNOREGULATORY_INTERACTIONS_BETWEEN_A_LYMPHOID_AND_A_NON_LYMPHOID_CELL	REACTOME_IMMUNOREGULATORY_INTERACTIONS_BETWEEN_A_LYMPHOID_AND_A_NON_LYMPHOID_CELL		176	0.27037	1.261	0.0715835	0.205721	1	7835	tags=43%, list=33%, signal=64%
KEGG_DILATED_CARDIOMYOPATHY	KEGG_DILATED_CARDIOMYOPATHY		79	0.301722	1.26047	0.10251	0.20589	1	6160	tags=35%, list=26%, signal=48%
REACTOME_INSERTION_OF_TAIL_ANCHORED_PROTEINS_INTO_THE_ENDOPLASMIC_RETICULUM_MEMBRANE	REACTOME_INSERTION_OF_TAIL_ANCHORED_PROTEINS_INTO_THE_ENDOPLASMIC_RETICULUM_MEMBRANE		20	0.416046	1.25995	0.172131	0.205964	1	4040	tags=40%, list=17%, signal=48%
REACTOME_PLATELET_ADHESION_TO_EXPOSED_COLLAGEN	REACTOME_PLATELET_ADHESION_TO_EXPOSED_COLLAGEN		15	0.441803	1.25936	0.159329	0.206199	1	6970	tags=40%, list=30%, signal=57%
KEGG_PHENYLALANINE_METABOLISM	KEGG_PHENYLALANINE_METABOLISM		15	0.436472	1.25904	0.180851	0.206117	1	3928	tags=33%, list=17%, signal=40%
REACTOME_FORMATION_OF_FIBRIN_CLOT_CLOTTING_CASCADE	REACTOME_FORMATION_OF_FIBRIN_CLOT_CLOTTING_CASCADE		25	0.385453	1.25747	0.158242	0.207509	1	2456	tags=16%, list=10%, signal=18%
REACTOME_NEURONAL_SYSTEM	REACTOME_NEURONAL_SYSTEM		343	0.247981	1.25612	0.02079	0.20855	1	4435	tags=21%, list=19%, signal=25%
REACTOME_TCR_SIGNALING	REACTOME_TCR_SIGNALING		115	0.282235	1.25248	0.06639	0.212397	1	3614	tags=23%, list=15%, signal=27%
REACTOME_HDACS_DEACETYLATE_HISTONES	REACTOME_HDACS_DEACETYLATE_HISTONES		32	0.362677	1.25075	0.168016	0.214051	1	6129	tags=53%, list=26%, signal=72%
REACTOME_RAP1_SIGNALLING	REACTOME_RAP1_SIGNALLING		15	0.435411	1.24895	0.172619	0.215791	1	4042	tags=40%, list=17%, signal=48%
KEGG_LONG_TERM_DEPRESSION	KEGG_LONG_TERM_DEPRESSION		57	0.32289	1.24442	0.123203	0.220944	1	3069	tags=21%, list=13%, signal=24%
REACTOME_POTENTIAL_THERAPEUTICS_FOR_SARS	REACTOME_POTENTIAL_THERAPEUTICS_FOR_SARS		79	0.300229	1.24274	0.0958333	0.222538	1	6280	tags=46%, list=27%, signal=62%
HALLMARK_APICAL_JUNCTION	HALLMARK_APICAL_JUNCTION		179	0.262652	1.23883	0.0640496	0.226986	1	4731	tags=24%, list=20%, signal=30%
KEGG_VASCULAR_SMOOTH_MUSCLE_CONTRACTION	KEGG_VASCULAR_SMOOTH_MUSCLE_CONTRACTION		93	0.289716	1.23747	0.0920771	0.228259	1	5268	tags=33%, list=23%, signal=43%
REACTOME_GLUCAGON_SIGNALING_IN_METABOLIC_REGULATION	REACTOME_GLUCAGON_SIGNALING_IN_METABOLIC_REGULATION		28	0.371598	1.23743	0.177062	0.227838	1	6079	tags=46%, list=26%, signal=63%
REACTOME_ESTROGEN_DEPENDENT_GENE_EXPRESSION	REACTOME_ESTROGEN_DEPENDENT_GENE_EXPRESSION		89	0.29506	1.23485	0.113333	0.230777	1	3945	tags=27%, list=17%, signal=32%
REACTOME_INTERFERON_SIGNALING	REACTOME_INTERFERON_SIGNALING		184	0.261222	1.23428	0.0689655	0.231034	1	4903	tags=32%, list=21%, signal=40%
REACTOME_DOWNSTREAM_SIGNALING_EVENTS_OF_B_CELL_RECEPTOR_BCR	REACTOME_DOWNSTREAM_SIGNALING_EVENTS_OF_B_CELL_RECEPTOR_BCR		79	0.28868	1.23323	0.11804	0.231895	1	1961	tags=16%, list=8%, signal=18%
REACTOME_ERBB2_REGULATES_CELL_MOTILITY	REACTOME_ERBB2_REGULATES_CELL_MOTILITY		15	0.440719	1.2324	0.212903	0.232423	1	4244	tags=40%, list=18%, signal=49%
REACTOME_CARGO_RECOGNITION_FOR_CLATHRIN_MEDIATED_ENDOCYTOSIS	REACTOME_CARGO_RECOGNITION_FOR_CLATHRIN_MEDIATED_ENDOCYTOSIS		96	0.28249	1.22778	0.110647	0.238118	1	3485	tags=22%, list=15%, signal=26%
REACTOME_RAB_REGULATION_OF_TRAFFICKING	REACTOME_RAB_REGULATION_OF_TRAFFICKING		121	0.275752	1.22741	0.0926724	0.238055	1	3765	tags=27%, list=16%, signal=32%
REACTOME_HS_GAG_DEGRADATION	REACTOME_HS_GAG_DEGRADATION		20	0.405517	1.2243	0.198312	0.241695	1	1647	tags=20%, list=7%, signal=21%
REACTOME_REGULATION_OF_TNFR1_SIGNALING	REACTOME_REGULATION_OF_TNFR1_SIGNALING		34	0.352411	1.22168	0.172269	0.244645	1	4281	tags=38%, list=18%, signal=47%
KEGG_PRION_DISEASES	KEGG_PRION_DISEASES		31	0.367603	1.2202	0.178	0.246126	1	5232	tags=45%, list=22%, signal=58%
REACTOME_CELL_DEATH_SIGNALLING_VIA_NRAGE_NRIF_AND_NADE	REACTOME_CELL_DEATH_SIGNALLING_VIA_NRAGE_NRIF_AND_NADE		74	0.297909	1.21949	0.141593	0.246579	1	4739	tags=27%, list=20%, signal=34%
REACTOME_PROGRAMMED_CELL_DEATH	REACTOME_PROGRAMMED_CELL_DEATH		196	0.254528	1.21855	0.0815451	0.247275	1	3713	tags=24%, list=16%, signal=28%
HALLMARK_G2M_CHECKPOINT	HALLMARK_G2M_CHECKPOINT		189	0.257763	1.21544	0.071579	0.250901	1	3953	tags=24%, list=17%, signal=28%
REACTOME_PHASE_4_RESTING_MEMBRANE_POTENTIAL	REACTOME_PHASE_4_RESTING_MEMBRANE_POTENTIAL		15	0.422975	1.21136	0.21875	0.255777	1	6454	tags=53%, list=28%, signal=74%
REACTOME_INTERACTION_BETWEEN_L1_AND_ANKYRINS	REACTOME_INTERACTION_BETWEEN_L1_AND_ANKYRINS		28	0.361399	1.21068	0.184959	0.256226	1	4800	tags=29%, list=21%, signal=36%
REACTOME_GENERATION_OF_SECOND_MESSENGER_MOLECULES	REACTOME_GENERATION_OF_SECOND_MESSENGER_MOLECULES		32	0.355681	1.21013	0.185031	0.256416	1	6308	tags=44%, list=27%, signal=60%
REACTOME_CREB1_PHOSPHORYLATION_THROUGH_NMDA_RECEPTOR_MEDIATED_ACTIVATION_OF_RAS_SIGNALING	REACTOME_CREB1_PHOSPHORYLATION_THROUGH_NMDA_RECEPTOR_MEDIATED_ACTIVATION_OF_RAS_SIGNALING		28	0.363507	1.2096	0.204499	0.256676	1	3194	tags=21%, list=14%, signal=25%
REACTOME_TRANSCRIPTIONAL_REGULATION_BY_RUNX3	REACTOME_TRANSCRIPTIONAL_REGULATION_BY_RUNX3		94	0.279254	1.20903	0.131696	0.256866	1	3701	tags=21%, list=16%, signal=25%
REACTOME_MRNA_DECAY_BY_5_TO_3_EXORIBONUCLEASE	REACTOME_MRNA_DECAY_BY_5_TO_3_EXORIBONUCLEASE		15	0.434628	1.20765	0.221748	0.258199	1	1557	tags=27%, list=7%, signal=29%
REACTOME_CARBOXYTERMINAL_POST_TRANSLATIONAL_MODIFICATIONS_OF_TUBULIN	REACTOME_CARBOXYTERMINAL_POST_TRANSLATIONAL_MODIFICATIONS_OF_TUBULIN		37	0.339818	1.20486	0.193939	0.261837	1	2451	tags=22%, list=10%, signal=24%
REACTOME_FORMATION_OF_TUBULIN_FOLDING_INTERMEDIATES_BY_CCT_TRIC	REACTOME_FORMATION_OF_TUBULIN_FOLDING_INTERMEDIATES_BY_CCT_TRIC		23	0.384735	1.2041	0.196687	0.262319	1	2378	tags=26%, list=10%, signal=29%
REACTOME_OTHER_SEMAPHORIN_INTERACTIONS	REACTOME_OTHER_SEMAPHORIN_INTERACTIONS		19	0.412176	1.20269	0.22314	0.263755	1	6381	tags=37%, list=27%, signal=51%
REACTOME_SARS_COV_INFECTIONS	REACTOME_SARS_COV_INFECTIONS		144	0.263223	1.20263	0.102459	0.263293	1	4073	tags=28%, list=17%, signal=33%
REACTOME_NEUROTRANSMITTER_RELEASE_CYCLE	REACTOME_NEUROTRANSMITTER_RELEASE_CYCLE		44	0.325086	1.20106	0.181628	0.265061	1	4435	tags=25%, list=19%, signal=31%
REACTOME_MAP3K8_TPL2_DEPENDENT_MAPK1_3_ACTIVATION	REACTOME_MAP3K8_TPL2_DEPENDENT_MAPK1_3_ACTIVATION		16	0.418844	1.19978	0.230608	0.266265	1	3164	tags=38%, list=14%, signal=43%
REACTOME_RECYCLING_PATHWAY_OF_L1	REACTOME_RECYCLING_PATHWAY_OF_L1		42	0.333437	1.19859	0.189796	0.26742	1	2378	tags=19%, list=10%, signal=21%
REACTOME_INTERLEUKIN_37_SIGNALING	REACTOME_INTERLEUKIN_37_SIGNALING		20	0.389506	1.19841	0.20524	0.267125	1	3130	tags=25%, list=13%, signal=29%
REACTOME_BUDDING_AND_MATURATION_OF_HIV_VIRION	REACTOME_BUDDING_AND_MATURATION_OF_HIV_VIRION		28	0.353877	1.19743	0.208589	0.268118	1	4091	tags=36%, list=17%, signal=43%
REACTOME_APOPTOTIC_EXECUTION_PHASE	REACTOME_APOPTOTIC_EXECUTION_PHASE		44	0.320136	1.19741	0.164241	0.267593	1	3713	tags=27%, list=16%, signal=32%
REACTOME_AMINO_ACID_TRANSPORT_ACROSS_THE_PLASMA_MEMBRANE	REACTOME_AMINO_ACID_TRANSPORT_ACROSS_THE_PLASMA_MEMBRANE		27	0.362022	1.1964	0.206316	0.268511	1	7081	tags=48%, list=30%, signal=69%
REACTOME_ADRENALINE_NORADRENALINE_INHIBITS_INSULIN_SECRETION	REACTOME_ADRENALINE_NORADRENALINE_INHIBITS_INSULIN_SECRETION		25	0.364526	1.19516	0.237395	0.269744	1	6385	tags=44%, list=27%, signal=60%
REACTOME_ACTIVATION_OF_GENE_EXPRESSION_BY_SREBF_SREBP	REACTOME_ACTIVATION_OF_GENE_EXPRESSION_BY_SREBF_SREBP		42	0.326727	1.19006	0.182979	0.276707	1	2838	tags=19%, list=12%, signal=22%
HALLMARK_MTORC1_SIGNALING	HALLMARK_MTORC1_SIGNALING		196	0.249021	1.18917	0.101911	0.277378	1	3206	tags=22%, list=14%, signal=25%
REACTOME_TRIGLYCERIDE_CATABOLISM	REACTOME_TRIGLYCERIDE_CATABOLISM		19	0.399075	1.18876	0.218341	0.277424	1	3065	tags=32%, list=13%, signal=36%
KEGG_TYPE_II_DIABETES_MELLITUS	KEGG_TYPE_II_DIABETES_MELLITUS		44	0.323479	1.18867	0.181435	0.277006	1	3663	tags=27%, list=16%, signal=32%
REACTOME_PARASITE_INFECTION	REACTOME_PARASITE_INFECTION		116	0.267472	1.18313	0.147436	0.284829	1	4376	tags=21%, list=19%, signal=25%
REACTOME_CHAPERONE_MEDIATED_AUTOPHAGY	REACTOME_CHAPERONE_MEDIATED_AUTOPHAGY		19	0.400122	1.1821	0.232653	0.285818	1	4914	tags=42%, list=21%, signal=53%
REACTOME_REGULATION_OF_TLR_BY_ENDOGENOUS_LIGAND	REACTOME_REGULATION_OF_TLR_BY_ENDOGENOUS_LIGAND		17	0.414481	1.18185	0.245833	0.285547	1	7130	tags=53%, list=30%, signal=76%
KEGG_TASTE_TRANSDUCTION	KEGG_TASTE_TRANSDUCTION		22	0.381228	1.17458	0.244161	0.296063	1	3739	tags=27%, list=16%, signal=32%
REACTOME_UB_SPECIFIC_PROCESSING_PROTEASES	REACTOME_UB_SPECIFIC_PROCESSING_PROTEASES		157	0.251872	1.17325	0.126087	0.297557	1	5176	tags=31%, list=22%, signal=39%
REACTOME_RAB_GEFS_EXCHANGE_GTP_FOR_GDP_ON_RABS	REACTOME_RAB_GEFS_EXCHANGE_GTP_FOR_GDP_ON_RABS		89	0.278254	1.17271	0.176856	0.297743	1	3562	tags=28%, list=15%, signal=33%
REACTOME_SEMA3A_PAK_DEPENDENT_AXON_REPULSION	REACTOME_SEMA3A_PAK_DEPENDENT_AXON_REPULSION		16	0.413204	1.17027	0.25462	0.301078	1	8435	tags=75%, list=36%, signal=117%
REACTOME_RHOJ_GTPASE_CYCLE	REACTOME_RHOJ_GTPASE_CYCLE		54	0.305161	1.17016	0.191617	0.300629	1	4544	tags=33%, list=19%, signal=41%
REACTOME_RESOLUTION_OF_SISTER_CHROMATID_COHESION	REACTOME_RESOLUTION_OF_SISTER_CHROMATID_COHESION		116	0.263069	1.1689	0.167024	0.301977	1	3407	tags=23%, list=15%, signal=27%
REACTOME_COPI_INDEPENDENT_GOLGI_TO_ER_RETROGRADE_TRAFFIC	REACTOME_COPI_INDEPENDENT_GOLGI_TO_ER_RETROGRADE_TRAFFIC		47	0.312018	1.16875	0.191304	0.301585	1	3604	tags=26%, list=15%, signal=30%
REACTOME_APOPTOSIS	REACTOME_APOPTOSIS		167	0.249781	1.1666	0.141304	0.304461	1	3713	tags=24%, list=16%, signal=28%
REACTOME_CA_DEPENDENT_EVENTS	REACTOME_CA_DEPENDENT_EVENTS		34	0.331776	1.16646	0.219828	0.304116	1	5839	tags=44%, list=25%, signal=59%
REACTOME_ENDOSOMAL_SORTING_COMPLEX_REQUIRED_FOR_TRANSPORT_ESCRT	REACTOME_ENDOSOMAL_SORTING_COMPLEX_REQUIRED_FOR_TRANSPORT_ESCRT		31	0.340556	1.16593	0.236948	0.30429	1	4091	tags=35%, list=17%, signal=43%
KEGG_SPHINGOLIPID_METABOLISM	KEGG_SPHINGOLIPID_METABOLISM		36	0.33194	1.16208	0.235169	0.309699	1	5284	tags=36%, list=23%, signal=47%
REACTOME_HS_GAG_BIOSYNTHESIS	REACTOME_HS_GAG_BIOSYNTHESIS		27	0.352477	1.16197	0.257028	0.309241	1	2134	tags=22%, list=9%, signal=24%
REACTOME_O_LINKED_GLYCOSYLATION	REACTOME_O_LINKED_GLYCOSYLATION		99	0.26786	1.15821	0.163793	0.314863	1	4330	tags=23%, list=19%, signal=28%
REACTOME_FCGAMMA_RECEPTOR_FCGR_DEPENDENT_PHAGOCYTOSIS	REACTOME_FCGAMMA_RECEPTOR_FCGR_DEPENDENT_PHAGOCYTOSIS		143	0.253044	1.1562	0.174442	0.317634	1	4376	tags=22%, list=19%, signal=27%
KEGG_PROGESTERONE_MEDIATED_OOCYTE_MATURATION	KEGG_PROGESTERONE_MEDIATED_OOCYTE_MATURATION		81	0.276846	1.15618	0.195745	0.317049	1	2790	tags=21%, list=12%, signal=24%
REACTOME_POST_CHAPERONIN_TUBULIN_FOLDING_PATHWAY	REACTOME_POST_CHAPERONIN_TUBULIN_FOLDING_PATHWAY		20	0.385231	1.15547	0.24406	0.317547	1	5593	tags=50%, list=24%, signal=66%
REACTOME_RHO_GTPASES_ACTIVATE_FORMINS	REACTOME_RHO_GTPASES_ACTIVATE_FORMINS		129	0.25893	1.15449	0.164179	0.318551	1	3065	tags=21%, list=13%, signal=24%
REACTOME_CLASS_I_MHC_MEDIATED_ANTIGEN_PROCESSING_PRESENTATION	REACTOME_CLASS_I_MHC_MEDIATED_ANTIGEN_PROCESSING_PRESENTATION		356	0.227238	1.15091	0.0959488	0.323792	1	4697	tags=27%, list=20%, signal=33%
KEGG_PROXIMAL_TUBULE_BICARBONATE_RECLAMATION	KEGG_PROXIMAL_TUBULE_BICARBONATE_RECLAMATION		19	0.38284	1.15088	0.244306	0.323206	1	5154	tags=42%, list=22%, signal=54%
REACTOME_SENSORY_PROCESSING_OF_SOUND_BY_OUTER_HAIR_CELLS_OF_THE_COCHLEA	REACTOME_SENSORY_PROCESSING_OF_SOUND_BY_OUTER_HAIR_CELLS_OF_THE_COCHLEA		47	0.30515	1.14898	0.237581	0.325767	1	6787	tags=40%, list=29%, signal=57%
KEGG_LYSOSOME	KEGG_LYSOSOME		118	0.260854	1.14199	0.208602	0.336728	1	3911	tags=22%, list=17%, signal=26%
REACTOME_EPIGENETIC_REGULATION_OF_GENE_EXPRESSION	REACTOME_EPIGENETIC_REGULATION_OF_GENE_EXPRESSION		84	0.27303	1.14113	0.182008	0.337408	1	2687	tags=23%, list=11%, signal=25%
REACTOME_FOXO_MEDIATED_TRANSCRIPTION_OF_CELL_CYCLE_GENES	REACTOME_FOXO_MEDIATED_TRANSCRIPTION_OF_CELL_CYCLE_GENES		16	0.395597	1.14076	0.267782	0.337415	1	6122	tags=63%, list=26%, signal=85%
REACTOME_CTLA4_INHIBITORY_SIGNALING	REACTOME_CTLA4_INHIBITORY_SIGNALING		21	0.370541	1.13984	0.27027	0.338336	1	4873	tags=38%, list=21%, signal=48%
REACTOME_EPHRIN_SIGNALING	REACTOME_EPHRIN_SIGNALING		18	0.378383	1.1384	0.284314	0.340044	1	6565	tags=50%, list=28%, signal=69%
REACTOME_EPH_EPHRIN_MEDIATED_REPULSION_OF_CELLS	REACTOME_EPH_EPHRIN_MEDIATED_REPULSION_OF_CELLS		49	0.306239	1.13675	0.233954	0.34226	1	4376	tags=27%, list=19%, signal=33%
REACTOME_GLUTAMATE_NEUROTRANSMITTER_RELEASE_CYCLE	REACTOME_GLUTAMATE_NEUROTRANSMITTER_RELEASE_CYCLE		22	0.368326	1.13639	0.279835	0.342237	1	1440	tags=14%, list=6%, signal=15%
REACTOME_KERATAN_SULFATE_BIOSYNTHESIS	REACTOME_KERATAN_SULFATE_BIOSYNTHESIS		26	0.349992	1.13529	0.289421	0.343415	1	3720	tags=31%, list=16%, signal=37%
REACTOME_RHOBTB2_GTPASE_CYCLE	REACTOME_RHOBTB2_GTPASE_CYCLE		23	0.352611	1.13249	0.288344	0.347478	1	3945	tags=35%, list=17%, signal=42%
REACTOME_G_PROTEIN_MEDIATED_EVENTS	REACTOME_G_PROTEIN_MEDIATED_EVENTS		49	0.302935	1.13226	0.251586	0.34723	1	4379	tags=31%, list=19%, signal=38%
REACTOME_ION_HOMEOSTASIS	REACTOME_ION_HOMEOSTASIS		51	0.295481	1.13175	0.261682	0.347398	1	7410	tags=43%, list=32%, signal=63%
REACTOME_SIGNALING_BY_NOTCH1_HD_DOMAIN_MUTANTS_IN_CANCER	REACTOME_SIGNALING_BY_NOTCH1_HD_DOMAIN_MUTANTS_IN_CANCER		15	0.412734	1.12722	0.304609	0.35455	1	5142	tags=47%, list=22%, signal=60%
REACTOME_SELECTIVE_AUTOPHAGY	REACTOME_SELECTIVE_AUTOPHAGY		72	0.27378	1.12637	0.253086	0.35532	1	4008	tags=26%, list=17%, signal=32%
REACTOME_TP53_REGULATES_TRANSCRIPTION_OF_CELL_DEATH_GENES	REACTOME_TP53_REGULATES_TRANSCRIPTION_OF_CELL_DEATH_GENES		43	0.309772	1.12536	0.26477	0.356449	1	4391	tags=33%, list=19%, signal=40%
REACTOME_FORMATION_OF_THE_BETA_CATENIN_TCF_TRANSACTIVATING_COMPLEX	REACTOME_FORMATION_OF_THE_BETA_CATENIN_TCF_TRANSACTIVATING_COMPLEX		31	0.327746	1.12011	0.274162	0.365235	1	2375	tags=23%, list=10%, signal=25%
REACTOME_G_ALPHA_12_13_SIGNALLING_EVENTS	REACTOME_G_ALPHA_12_13_SIGNALLING_EVENTS		76	0.272537	1.11933	0.249467	0.365974	1	4739	tags=28%, list=20%, signal=35%
REACTOME_REGULATION_OF_TP53_ACTIVITY	REACTOME_REGULATION_OF_TP53_ACTIVITY		154	0.240697	1.11668	0.203426	0.37011	1	3953	tags=23%, list=17%, signal=28%
REACTOME_AMINE_LIGAND_BINDING_RECEPTORS	REACTOME_AMINE_LIGAND_BINDING_RECEPTORS		18	0.380439	1.11523	0.313333	0.372106	1	14498	tags=100%, list=62%, signal=263%
KEGG_SMALL_CELL_LUNG_CANCER	KEGG_SMALL_CELL_LUNG_CANCER		84	0.26781	1.11494	0.24026	0.371922	1	6458	tags=40%, list=28%, signal=56%
REACTOME_PHOSPHOLIPID_METABOLISM	REACTOME_PHOSPHOLIPID_METABOLISM		188	0.23802	1.11349	0.2	0.373872	1	3623	tags=23%, list=15%, signal=27%
REACTOME_NETRIN_1_SIGNALING	REACTOME_NETRIN_1_SIGNALING		46	0.302423	1.1126	0.272331	0.374758	1	5347	tags=26%, list=23%, signal=34%
REACTOME_HCMV_INFECTION	REACTOME_HCMV_INFECTION		94	0.262081	1.11062	0.268817	0.377615	1	5141	tags=36%, list=22%, signal=46%
REACTOME_ANTIGEN_PROCESSING_UBIQUITINATION_PROTEASOME_DEGRADATION	REACTOME_ANTIGEN_PROCESSING_UBIQUITINATION_PROTEASOME_DEGRADATION		291	0.222987	1.10989	0.179039	0.378305	1	4697	tags=26%, list=20%, signal=32%
REACTOME_SIGNALING_BY_FGFR2_IN_DISEASE	REACTOME_SIGNALING_BY_FGFR2_IN_DISEASE		36	0.315288	1.10861	0.300626	0.379711	1	2665	tags=22%, list=11%, signal=25%
KEGG_NEUROACTIVE_LIGAND_RECEPTOR_INTERACTION	KEGG_NEUROACTIVE_LIGAND_RECEPTOR_INTERACTION		187	0.23257	1.10772	0.210753	0.380701	1	4274	tags=19%, list=18%, signal=23%
REACTOME_INTEGRATION_OF_ENERGY_METABOLISM	REACTOME_INTEGRATION_OF_ENERGY_METABOLISM		97	0.257128	1.10616	0.263374	0.382873	1	2761	tags=16%, list=12%, signal=19%
REACTOME_HSP90_CHAPERONE_CYCLE_FOR_STEROID_HORMONE_RECEPTORS_SHR	REACTOME_HSP90_CHAPERONE_CYCLE_FOR_STEROID_HORMONE_RECEPTORS_SHR		51	0.288854	1.106	0.275	0.382428	1	6398	tags=45%, list=27%, signal=62%
REACTOME_IRON_UPTAKE_AND_TRANSPORT	REACTOME_IRON_UPTAKE_AND_TRANSPORT		54	0.288193	1.10222	0.261682	0.388867	1	4040	tags=31%, list=17%, signal=38%
REACTOME_SMAD2_SMAD3_SMAD4_HETEROTRIMER_REGULATES_TRANSCRIPTION	REACTOME_SMAD2_SMAD3_SMAD4_HETEROTRIMER_REGULATES_TRANSCRIPTION		31	0.31941	1.10149	0.323232	0.389536	1	3164	tags=26%, list=14%, signal=30%
REACTOME_SIGNAL_TRANSDUCTION_BY_L1	REACTOME_SIGNAL_TRANSDUCTION_BY_L1		21	0.357298	1.10015	0.327044	0.391347	1	6118	tags=38%, list=26%, signal=52%
KEGG_NOTCH_SIGNALING_PATHWAY	KEGG_NOTCH_SIGNALING_PATHWAY		46	0.292593	1.09861	0.283871	0.393443	1	5374	tags=33%, list=23%, signal=42%
REACTOME_SIGNALING_BY_NOTCH2	REACTOME_SIGNALING_BY_NOTCH2		33	0.315635	1.09809	0.291304	0.393654	1	6976	tags=45%, list=30%, signal=65%
REACTOME_SARS_COV_2_INFECTION	REACTOME_SARS_COV_2_INFECTION		66	0.269427	1.09739	0.28	0.39423	1	3164	tags=24%, list=14%, signal=28%
REACTOME_CASPASE_ACTIVATION_VIA_EXTRINSIC_APOPTOTIC_SIGNALLING_PATHWAY	REACTOME_CASPASE_ACTIVATION_VIA_EXTRINSIC_APOPTOTIC_SIGNALLING_PATHWAY		26	0.339108	1.09395	0.318725	0.400057	1	5586	tags=35%, list=24%, signal=45%
REACTOME_ACTIVATED_NOTCH1_TRANSMITS_SIGNAL_TO_THE_NUCLEUS	REACTOME_ACTIVATED_NOTCH1_TRANSMITS_SIGNAL_TO_THE_NUCLEUS		29	0.317136	1.09237	0.331034	0.402246	1	5344	tags=38%, list=23%, signal=49%
KEGG_CALCIUM_SIGNALING_PATHWAY	KEGG_CALCIUM_SIGNALING_PATHWAY		151	0.238159	1.0913	0.27033	0.403537	1	5521	tags=26%, list=24%, signal=34%
REACTOME_CRMPS_IN_SEMA3A_SIGNALING	REACTOME_CRMPS_IN_SEMA3A_SIGNALING		15	0.380502	1.09128	0.331976	0.402856	1	7492	tags=60%, list=32%, signal=88%
REACTOME_VEGFR2_MEDIATED_VASCULAR_PERMEABILITY	REACTOME_VEGFR2_MEDIATED_VASCULAR_PERMEABILITY		27	0.323904	1.09123	0.328421	0.402217	1	3843	tags=22%, list=16%, signal=27%
REACTOME_CROSSLINKING_OF_COLLAGEN_FIBRILS	REACTOME_CROSSLINKING_OF_COLLAGEN_FIBRILS		18	0.36338	1.09086	0.347737	0.402232	1	6970	tags=39%, list=30%, signal=55%
REACTOME_PLASMA_LIPOPROTEIN_ASSEMBLY_REMODELING_AND_CLEARANCE	REACTOME_PLASMA_LIPOPROTEIN_ASSEMBLY_REMODELING_AND_CLEARANCE		60	0.276843	1.09009	0.304527	0.402964	1	2802	tags=20%, list=12%, signal=23%
REACTOME_CARDIAC_CONDUCTION	REACTOME_CARDIAC_CONDUCTION		110	0.247523	1.08797	0.25974	0.406212	1	5368	tags=25%, list=23%, signal=32%
KEGG_WNT_SIGNALING_PATHWAY	KEGG_WNT_SIGNALING_PATHWAY		136	0.239424	1.08752	0.258475	0.406414	1	2761	tags=19%, list=12%, signal=22%
REACTOME_TERMINATION_OF_O_GLYCAN_BIOSYNTHESIS	REACTOME_TERMINATION_OF_O_GLYCAN_BIOSYNTHESIS		21	0.346276	1.0875	0.352679	0.405744	1	3937	tags=29%, list=17%, signal=34%
REACTOME_PTEN_REGULATION	REACTOME_PTEN_REGULATION		136	0.238731	1.08366	0.267782	0.412597	1	4712	tags=26%, list=20%, signal=33%
REACTOME_RAS_ACTIVATION_UPON_CA2_INFLUX_THROUGH_NMDA_RECEPTOR	REACTOME_RAS_ACTIVATION_UPON_CA2_INFLUX_THROUGH_NMDA_RECEPTOR		20	0.356965	1.08291	0.344298	0.413308	1	4379	tags=25%, list=19%, signal=31%
REACTOME_CLEC7A_DECTIN_1_SIGNALING	REACTOME_CLEC7A_DECTIN_1_SIGNALING		97	0.255421	1.08223	0.327549	0.413903	1	3194	tags=20%, list=14%, signal=23%
REACTOME_COOPERATION_OF_PDCL_PHLP1_AND_TRIC_CCT_IN_G_PROTEIN_BETA_FOLDING	REACTOME_COOPERATION_OF_PDCL_PHLP1_AND_TRIC_CCT_IN_G_PROTEIN_BETA_FOLDING		35	0.305221	1.08196	0.298755	0.41372	1	6385	tags=43%, list=27%, signal=59%
REACTOME_VISUAL_PHOTOTRANSDUCTION	REACTOME_VISUAL_PHOTOTRANSDUCTION		73	0.26278	1.08185	0.31185	0.41325	1	4050	tags=25%, list=17%, signal=30%
REACTOME_REGULATION_OF_PTEN_GENE_TRANSCRIPTION	REACTOME_REGULATION_OF_PTEN_GENE_TRANSCRIPTION		60	0.27307	1.08089	0.336134	0.414433	1	4165	tags=30%, list=18%, signal=36%
REACTOME_SENESCENCE_ASSOCIATED_SECRETORY_PHENOTYPE_SASP	REACTOME_SENESCENCE_ASSOCIATED_SECRETORY_PHENOTYPE_SASP		52	0.274577	1.07803	0.323591	0.419254	1	3501	tags=27%, list=15%, signal=32%
REACTOME_PKA_MEDIATED_PHOSPHORYLATION_OF_CREB	REACTOME_PKA_MEDIATED_PHOSPHORYLATION_OF_CREB		18	0.360589	1.07746	0.351406	0.4196	1	5268	tags=44%, list=23%, signal=57%
REACTOME_ESTROGEN_DEPENDENT_NUCLEAR_EVENTS_DOWNSTREAM_OF_ESR_MEMBRANE_SIGNALING	REACTOME_ESTROGEN_DEPENDENT_NUCLEAR_EVENTS_DOWNSTREAM_OF_ESR_MEMBRANE_SIGNALING		23	0.331637	1.07738	0.352705	0.419032	1	2250	tags=22%, list=10%, signal=24%
REACTOME_DISEASES_OF_PROGRAMMED_CELL_DEATH	REACTOME_DISEASES_OF_PROGRAMMED_CELL_DEATH		41	0.296006	1.07504	0.338028	0.422724	1	2055	tags=22%, list=9%, signal=24%
REACTOME_TRIGLYCERIDE_METABOLISM	REACTOME_TRIGLYCERIDE_METABOLISM		29	0.319624	1.07491	0.325726	0.422207	1	3526	tags=24%, list=15%, signal=28%
REACTOME_REGULATION_OF_BETA_CELL_DEVELOPMENT	REACTOME_REGULATION_OF_BETA_CELL_DEVELOPMENT		31	0.32222	1.07363	0.327345	0.424002	1	6976	tags=45%, list=30%, signal=64%
REACTOME_MOLECULES_ASSOCIATED_WITH_ELASTIC_FIBRES	REACTOME_MOLECULES_ASSOCIATED_WITH_ELASTIC_FIBRES		36	0.301591	1.07337	0.347921	0.42374	1	6943	tags=47%, list=30%, signal=67%
REACTOME_SARS_COV_1_INFECTION	REACTOME_SARS_COV_1_INFECTION		49	0.280011	1.07333	0.328685	0.423067	1	3164	tags=27%, list=14%, signal=31%
REACTOME_TRANSCRIPTIONAL_REGULATION_BY_TP53	REACTOME_TRANSCRIPTIONAL_REGULATION_BY_TP53		351	0.212125	1.07201	0.234649	0.424831	1	3989	tags=23%, list=17%, signal=27%
REACTOME_CELLULAR_HEXOSE_TRANSPORT	REACTOME_CELLULAR_HEXOSE_TRANSPORT		15	0.384305	1.06556	0.366109	0.436841	1	3538	tags=33%, list=15%, signal=39%
REACTOME_PRE_NOTCH_EXPRESSION_AND_PROCESSING	REACTOME_PRE_NOTCH_EXPRESSION_AND_PROCESSING		49	0.279146	1.06474	0.334061	0.43781	1	4066	tags=29%, list=17%, signal=35%
REACTOME_TNFS_BIND_THEIR_PHYSIOLOGICAL_RECEPTORS	REACTOME_TNFS_BIND_THEIR_PHYSIOLOGICAL_RECEPTORS		26	0.326748	1.06224	0.364017	0.442119	1	4834	tags=27%, list=21%, signal=34%
REACTOME_NOREPINEPHRINE_NEUROTRANSMITTER_RELEASE_CYCLE	REACTOME_NOREPINEPHRINE_NEUROTRANSMITTER_RELEASE_CYCLE		16	0.363952	1.06221	0.368308	0.441435	1	4195	tags=31%, list=18%, signal=38%
REACTOME_MEIOTIC_SYNAPSIS	REACTOME_MEIOTIC_SYNAPSIS		31	0.314159	1.05977	0.352113	0.445535	1	3360	tags=26%, list=14%, signal=30%
REACTOME_THE_ROLE_OF_NEF_IN_HIV_1_REPLICATION_AND_DISEASE_PATHOGENESIS	REACTOME_THE_ROLE_OF_NEF_IN_HIV_1_REPLICATION_AND_DISEASE_PATHOGENESIS		28	0.316527	1.0592	0.359081	0.445913	1	7190	tags=46%, list=31%, signal=67%
REACTOME_ANTI_INFLAMMATORY_RESPONSE_FAVOURING_LEISHMANIA_PARASITE_INFECTION	REACTOME_ANTI_INFLAMMATORY_RESPONSE_FAVOURING_LEISHMANIA_PARASITE_INFECTION		182	0.2224	1.05577	0.314856	0.451981	1	4477	tags=20%, list=19%, signal=25%
REACTOME_SIGNALING_BY_WNT	REACTOME_SIGNALING_BY_WNT		255	0.213592	1.05574	0.32043	0.451275	1	3647	tags=20%, list=16%, signal=23%
REACTOME_CYTOSOLIC_SENSORS_OF_PATHOGEN_ASSOCIATED_DNA	REACTOME_CYTOSOLIC_SENSORS_OF_PATHOGEN_ASSOCIATED_DNA		60	0.263433	1.04658	0.346895	0.469128	1	1805	tags=18%, list=8%, signal=20%
REACTOME_TRANSLATION_OF_SARS_COV_1_STRUCTURAL_PROTEINS	REACTOME_TRANSLATION_OF_SARS_COV_1_STRUCTURAL_PROTEINS		28	0.31886	1.04483	0.389722	0.471982	1	3164	tags=32%, list=14%, signal=37%
REACTOME_TRANSPORT_OF_INORGANIC_CATIONS_ANIONS_AND_AMINO_ACIDS_OLIGOPEPTIDES	REACTOME_TRANSPORT_OF_INORGANIC_CATIONS_ANIONS_AND_AMINO_ACIDS_OLIGOPEPTIDES		89	0.245525	1.04453	0.370614	0.471824	1	4413	tags=24%, list=19%, signal=29%
REACTOME_INITIATION_OF_NUCLEAR_ENVELOPE_NE_REFORMATION	REACTOME_INITIATION_OF_NUCLEAR_ENVELOPE_NE_REFORMATION		19	0.346867	1.03606	0.405858	0.488738	1	4846	tags=37%, list=21%, signal=46%
REACTOME_METABOLISM_OF_FAT_SOLUBLE_VITAMINS	REACTOME_METABOLISM_OF_FAT_SOLUBLE_VITAMINS		34	0.30064	1.03421	0.374468	0.491906	1	6979	tags=44%, list=30%, signal=63%
REACTOME_HYALURONAN_METABOLISM	REACTOME_HYALURONAN_METABOLISM		16	0.361562	1.03388	0.405702	0.49181	1	1772	tags=19%, list=8%, signal=20%
REACTOME_NRAGE_SIGNALS_DEATH_THROUGH_JNK	REACTOME_NRAGE_SIGNALS_DEATH_THROUGH_JNK		58	0.263106	1.02989	0.386454	0.499561	1	5590	tags=29%, list=24%, signal=38%
REACTOME_REGULATED_NECROSIS	REACTOME_REGULATED_NECROSIS		55	0.266528	1.02938	0.394958	0.49981	1	3968	tags=27%, list=17%, signal=33%
REACTOME_NEDDYLATION	REACTOME_NEDDYLATION		219	0.213148	1.02899	0.385744	0.499762	1	1879	tags=14%, list=8%, signal=15%
REACTOME_MAPK6_MAPK4_SIGNALING	REACTOME_MAPK6_MAPK4_SIGNALING		86	0.242759	1.02775	0.390756	0.501603	1	4648	tags=22%, list=20%, signal=27%
REACTOME_RHOBTB_GTPASE_CYCLE	REACTOME_RHOBTB_GTPASE_CYCLE		35	0.294886	1.02668	0.430063	0.503034	1	3945	tags=31%, list=17%, signal=38%
REACTOME_CELLULAR_RESPONSE_TO_HYPOXIA	REACTOME_CELLULAR_RESPONSE_TO_HYPOXIA		69	0.252524	1.0266	0.39666	0.502355	1	909	tags=10%, list=4%, signal=11%
REACTOME_HIV_ELONGATION_ARREST_AND_RECOVERY	REACTOME_HIV_ELONGATION_ARREST_AND_RECOVERY		29	0.299277	1.02517	0.425887	0.504755	1	5811	tags=41%, list=25%, signal=55%
KEGG_GLYCINE_SERINE_AND_THREONINE_METABOLISM	KEGG_GLYCINE_SERINE_AND_THREONINE_METABOLISM		27	0.312475	1.02475	0.406061	0.504783	1	3928	tags=22%, list=17%, signal=27%
REACTOME_NOTCH3_ACTIVATION_AND_TRANSMISSION_OF_SIGNAL_TO_THE_NUCLEUS	REACTOME_NOTCH3_ACTIVATION_AND_TRANSMISSION_OF_SIGNAL_TO_THE_NUCLEUS		25	0.315438	1.02455	0.393443	0.504325	1	5142	tags=32%, list=22%, signal=41%
REACTOME_SIGNALING_BY_NOTCH1	REACTOME_SIGNALING_BY_NOTCH1		72	0.250812	1.02309	0.424686	0.506708	1	5522	tags=33%, list=24%, signal=43%
REACTOME_DISEASES_OF_IMMUNE_SYSTEM	REACTOME_DISEASES_OF_IMMUNE_SYSTEM		28	0.30586	1.02286	0.389691	0.506338	1	4926	tags=39%, list=21%, signal=50%
REACTOME_PROTEIN_FOLDING	REACTOME_PROTEIN_FOLDING		90	0.24228	1.01942	0.419287	0.513118	1	6385	tags=41%, list=27%, signal=56%
REACTOME_CASPASE_ACTIVATION_VIA_DEATH_RECEPTORS_IN_THE_PRESENCE_OF_LIGAND	REACTOME_CASPASE_ACTIVATION_VIA_DEATH_RECEPTORS_IN_THE_PRESENCE_OF_LIGAND		16	0.35508	1.0172	0.422269	0.516991	1	7084	tags=56%, list=30%, signal=81%
REACTOME_POTASSIUM_CHANNELS	REACTOME_POTASSIUM_CHANNELS		80	0.245613	1.01396	0.42437	0.522922	1	6454	tags=35%, list=28%, signal=48%
REACTOME_FC_EPSILON_RECEPTOR_FCERI_SIGNALING	REACTOME_FC_EPSILON_RECEPTOR_FCERI_SIGNALING		184	0.21378	1.01141	0.4098	0.527829	1	3692	tags=17%, list=16%, signal=20%
REACTOME_TNFR2_NON_CANONICAL_NF_KB_PATHWAY	REACTOME_TNFR2_NON_CANONICAL_NF_KB_PATHWAY		96	0.235272	1.00998	0.429752	0.530194	1	4861	tags=24%, list=21%, signal=30%
REACTOME_SPHINGOLIPID_METABOLISM	REACTOME_SPHINGOLIPID_METABOLISM		83	0.242958	1.00962	0.439655	0.530033	1	3054	tags=19%, list=13%, signal=22%
REACTOME_SYNTHESIS_SECRETION_AND_INACTIVATION_OF_GLUCAGON_LIKE_PEPTIDE_1_GLP_1	REACTOME_SYNTHESIS_SECRETION_AND_INACTIVATION_OF_GLUCAGON_LIKE_PEPTIDE_1_GLP_1		15	0.349263	1.00815	0.43125	0.532427	1	251	tags=13%, list=1%, signal=13%
REACTOME_DAG_AND_IP3_SIGNALING	REACTOME_DAG_AND_IP3_SIGNALING		38	0.282523	1.00793	0.449597	0.532013	1	5839	tags=42%, list=25%, signal=56%
REACTOME_PLASMA_LIPOPROTEIN_REMODELING	REACTOME_PLASMA_LIPOPROTEIN_REMODELING		23	0.315728	1.0043	0.444906	0.539288	1	4515	tags=26%, list=19%, signal=32%
REACTOME_PROTEIN_PROTEIN_INTERACTIONS_AT_SYNAPSES	REACTOME_PROTEIN_PROTEIN_INTERACTIONS_AT_SYNAPSES		80	0.243425	1.00029	0.476923	0.547336	1	1654	tags=9%, list=7%, signal=9%
REACTOME_HCMV_EARLY_EVENTS	REACTOME_HCMV_EARLY_EVENTS		70	0.243311	0.999994	0.45328	0.547029	1	5141	tags=37%, list=22%, signal=47%
REACTOME_BETA_CATENIN_INDEPENDENT_WNT_SIGNALING	REACTOME_BETA_CATENIN_INDEPENDENT_WNT_SIGNALING		142	0.217538	0.996484	0.447581	0.554128	1	3645	tags=18%, list=16%, signal=22%
REACTOME_TRANSLATION_OF_SARS_COV_2_STRUCTURAL_PROTEINS	REACTOME_TRANSLATION_OF_SARS_COV_2_STRUCTURAL_PROTEINS		44	0.265706	0.994897	0.45679	0.556726	1	3164	tags=25%, list=14%, signal=29%
REACTOME_N_GLYCAN_ANTENNAE_ELONGATION_IN_THE_MEDIAL_TRANS_GOLGI	REACTOME_N_GLYCAN_ANTENNAE_ELONGATION_IN_THE_MEDIAL_TRANS_GOLGI		24	0.308313	0.99484	0.468817	0.55594	1	3678	tags=29%, list=16%, signal=35%
REACTOME_KERATAN_SULFATE_KERATIN_METABOLISM	REACTOME_KERATAN_SULFATE_KERATIN_METABOLISM		32	0.297758	0.993751	0.472803	0.557423	1	3720	tags=25%, list=16%, signal=30%
REACTOME_TNFR1_INDUCED_NFKAPPAB_SIGNALING_PATHWAY	REACTOME_TNFR1_INDUCED_NFKAPPAB_SIGNALING_PATHWAY		29	0.303011	0.993565	0.422269	0.556948	1	3558	tags=34%, list=15%, signal=41%
REACTOME_INCRETIN_SYNTHESIS_SECRETION_AND_INACTIVATION	REACTOME_INCRETIN_SYNTHESIS_SECRETION_AND_INACTIVATION		16	0.343295	0.992924	0.451943	0.55764	1	251	tags=13%, list=1%, signal=13%
REACTOME_LAMININ_INTERACTIONS	REACTOME_LAMININ_INTERACTIONS		30	0.296259	0.992623	0.459574	0.55744	1	6662	tags=47%, list=28%, signal=65%
REACTOME_COOPERATION_OF_PREFOLDIN_AND_TRIC_CCT_IN_ACTIN_AND_TUBULIN_FOLDING	REACTOME_COOPERATION_OF_PREFOLDIN_AND_TRIC_CCT_IN_ACTIN_AND_TUBULIN_FOLDING		30	0.287507	0.992609	0.459082	0.556579	1	5593	tags=37%, list=24%, signal=48%
REACTOME_AGGREPHAGY	REACTOME_AGGREPHAGY		36	0.283348	0.991735	0.486653	0.557677	1	3164	tags=28%, list=14%, signal=32%
REACTOME_ERK_MAPK_TARGETS	REACTOME_ERK_MAPK_TARGETS		22	0.323175	0.989947	0.472885	0.560774	1	2458	tags=23%, list=11%, signal=25%
REACTOME_DISASSEMBLY_OF_THE_DESTRUCTION_COMPLEX_AND_RECRUITMENT_OF_AXIN_TO_THE_MEMBRANE	REACTOME_DISASSEMBLY_OF_THE_DESTRUCTION_COMPLEX_AND_RECRUITMENT_OF_AXIN_TO_THE_MEMBRANE		29	0.298899	0.988185	0.478958	0.563744	1	2560	tags=21%, list=11%, signal=23%
REACTOME_NOTCH1_INTRACELLULAR_DOMAIN_REGULATES_TRANSCRIPTION	REACTOME_NOTCH1_INTRACELLULAR_DOMAIN_REGULATES_TRANSCRIPTION		48	0.259739	0.986924	0.444685	0.565805	1	5522	tags=33%, list=24%, signal=44%
REACTOME_ACTIVATION_OF_SMO	REACTOME_ACTIVATION_OF_SMO		15	0.346169	0.986645	0.470968	0.565487	1	3183	tags=27%, list=14%, signal=31%
KEGG_PHOSPHATIDYLINOSITOL_SIGNALING_SYSTEM	KEGG_PHOSPHATIDYLINOSITOL_SIGNALING_SYSTEM		73	0.241478	0.985644	0.461538	0.566728	1	3242	tags=21%, list=14%, signal=24%
REACTOME_DIGESTION_AND_ABSORPTION	REACTOME_DIGESTION_AND_ABSORPTION		16	0.342031	0.985526	0.454545	0.566098	1	7112	tags=50%, list=30%, signal=72%
REACTOME_SIGNALING_BY_HIPPO	REACTOME_SIGNALING_BY_HIPPO		20	0.328883	0.983135	0.475891	0.570624	1	3959	tags=30%, list=17%, signal=36%
KEGG_VASOPRESSIN_REGULATED_WATER_REABSORPTION	KEGG_VASOPRESSIN_REGULATED_WATER_REABSORPTION		41	0.269756	0.977862	0.492569	0.581493	1	5268	tags=37%, list=23%, signal=47%
REACTOME_DEFECTIVE_B4GALT7_CAUSES_EDS_PROGEROID_TYPE	REACTOME_DEFECTIVE_B4GALT7_CAUSES_EDS_PROGEROID_TYPE		18	0.32912	0.977656	0.496881	0.581021	1	2968	tags=22%, list=13%, signal=25%
REACTOME_NEUREXINS_AND_NEUROLIGINS	REACTOME_NEUREXINS_AND_NEUROLIGINS		52	0.252573	0.97144	0.5	0.594138	1	1654	tags=10%, list=7%, signal=10%
REACTOME_PROTEIN_UBIQUITINATION	REACTOME_PROTEIN_UBIQUITINATION		63	0.243	0.96801	0.515936	0.601055	1	4756	tags=30%, list=20%, signal=38%
REACTOME_DEFECTIVE_C1GALT1C1_CAUSES_TN_POLYAGGLUTINATION_SYNDROME_TNPS	REACTOME_DEFECTIVE_C1GALT1C1_CAUSES_TN_POLYAGGLUTINATION_SYNDROME_TNPS		15	0.342143	0.965668	0.498969	0.605543	1	3937	tags=27%, list=17%, signal=32%
REACTOME_NCAM1_INTERACTIONS	REACTOME_NCAM1_INTERACTIONS		39	0.271129	0.96182	0.52017	0.613514	1	7001	tags=38%, list=30%, signal=55%
REACTOME_HSF1_ACTIVATION	REACTOME_HSF1_ACTIVATION		28	0.292394	0.96088	0.543046	0.614752	1	3945	tags=36%, list=17%, signal=43%
REACTOME_TP53_REGULATES_TRANSCRIPTION_OF_ADDITIONAL_CELL_CYCLE_GENES_WHOSE_EXACT_ROLE_IN_THE_P53_PATHWAY_REMAIN_UNCERTAIN	REACTOME_TP53_REGULATES_TRANSCRIPTION_OF_ADDITIONAL_CELL_CYCLE_GENES_WHOSE_EXACT_ROLE_IN_THE_P53_PATHWAY_REMAIN_UNCERTAIN		20	0.301808	0.957925	0.510638	0.620708	1	613	tags=15%, list=3%, signal=15%
REACTOME_TRANSCRIPTIONAL_REGULATION_BY_RUNX2	REACTOME_TRANSCRIPTIONAL_REGULATION_BY_RUNX2		113	0.215701	0.957396	0.554393	0.620938	1	3164	tags=16%, list=14%, signal=18%
REACTOME_TRANSFERRIN_ENDOCYTOSIS_AND_RECYCLING	REACTOME_TRANSFERRIN_ENDOCYTOSIS_AND_RECYCLING		28	0.288974	0.954093	0.538462	0.627368	1	3629	tags=29%, list=16%, signal=34%
KEGG_PPAR_SIGNALING_PATHWAY	KEGG_PPAR_SIGNALING_PATHWAY		55	0.24555	0.948879	0.530568	0.638455	1	3164	tags=20%, list=14%, signal=23%
KEGG_OOCYTE_MEIOSIS	KEGG_OOCYTE_MEIOSIS		102	0.219034	0.948819	0.556503	0.637567	1	3194	tags=21%, list=14%, signal=24%
REACTOME_RHOBTB1_GTPASE_CYCLE	REACTOME_RHOBTB1_GTPASE_CYCLE		23	0.300497	0.947006	0.528662	0.640572	1	2525	tags=26%, list=11%, signal=29%
REACTOME_RECEPTOR_TYPE_TYROSINE_PROTEIN_PHOSPHATASES	REACTOME_RECEPTOR_TYPE_TYROSINE_PROTEIN_PHOSPHATASES		18	0.321725	0.945513	0.51073	0.643104	1	396	tags=6%, list=2%, signal=6%
REACTOME_ACTIVATION_OF_ANTERIOR_HOX_GENES_IN_HINDBRAIN_DEVELOPMENT_DURING_EARLY_EMBRYOGENESIS	REACTOME_ACTIVATION_OF_ANTERIOR_HOX_GENES_IN_HINDBRAIN_DEVELOPMENT_DURING_EARLY_EMBRYOGENESIS		58	0.244639	0.944797	0.551064	0.643662	1	2698	tags=19%, list=12%, signal=21%
REACTOME_REGULATION_OF_CHOLESTEROL_BIOSYNTHESIS_BY_SREBP_SREBF	REACTOME_REGULATION_OF_CHOLESTEROL_BIOSYNTHESIS_BY_SREBP_SREBF		55	0.244058	0.944304	0.56681	0.643777	1	4294	tags=24%, list=18%, signal=29%
REACTOME_ROS_AND_RNS_PRODUCTION_IN_PHAGOCYTES	REACTOME_ROS_AND_RNS_PRODUCTION_IN_PHAGOCYTES		33	0.270766	0.937793	0.544513	0.657943	1	3910	tags=27%, list=17%, signal=33%
REACTOME_ER_QUALITY_CONTROL_COMPARTMENT_ERQC	REACTOME_ER_QUALITY_CONTROL_COMPARTMENT_ERQC		20	0.308159	0.937469	0.527778	0.657666	1	3164	tags=25%, list=14%, signal=29%
REACTOME_DNA_DAMAGE_BYPASS	REACTOME_DNA_DAMAGE_BYPASS		46	0.250564	0.934859	0.585921	0.662785	1	3842	tags=20%, list=16%, signal=23%
REACTOME_SIGNALING_BY_NOTCH	REACTOME_SIGNALING_BY_NOTCH		172	0.196272	0.929326	0.669404	0.674702	1	3701	tags=19%, list=16%, signal=22%
REACTOME_THE_ROLE_OF_GTSE1_IN_G2_M_PROGRESSION_AFTER_G2_CHECKPOINT	REACTOME_THE_ROLE_OF_GTSE1_IN_G2_M_PROGRESSION_AFTER_G2_CHECKPOINT		72	0.226218	0.923233	0.628009	0.687733	1	4648	tags=22%, list=20%, signal=28%
REACTOME_LYSOSOME_VESICLE_BIOGENESIS	REACTOME_LYSOSOME_VESICLE_BIOGENESIS		34	0.267869	0.923143	0.582022	0.68691	1	2796	tags=18%, list=12%, signal=20%
REACTOME_DEGRADATION_OF_BETA_CATENIN_BY_THE_DESTRUCTION_COMPLEX	REACTOME_DEGRADATION_OF_BETA_CATENIN_BY_THE_DESTRUCTION_COMPLEX		82	0.224164	0.921339	0.655602	0.690081	1	3235	tags=18%, list=14%, signal=21%
REACTOME_PHASE_0_RAPID_DEPOLARISATION	REACTOME_PHASE_0_RAPID_DEPOLARISATION		27	0.279321	0.92014	0.561247	0.691757	1	4950	tags=26%, list=21%, signal=33%
REACTOME_DARPP_32_EVENTS	REACTOME_DARPP_32_EVENTS		23	0.288958	0.918442	0.5803	0.694519	1	4213	tags=30%, list=18%, signal=37%
REACTOME_PLASMA_LIPOPROTEIN_CLEARANCE	REACTOME_PLASMA_LIPOPROTEIN_CLEARANCE		31	0.267814	0.917448	0.610309	0.695712	1	2210	tags=19%, list=9%, signal=21%
REACTOME_MAPK_TARGETS_NUCLEAR_EVENTS_MEDIATED_BY_MAP_KINASES	REACTOME_MAPK_TARGETS_NUCLEAR_EVENTS_MEDIATED_BY_MAP_KINASES		31	0.264534	0.917105	0.598765	0.695471	1	2458	tags=23%, list=11%, signal=25%
REACTOME_STIMULI_SENSING_CHANNELS	REACTOME_STIMULI_SENSING_CHANNELS		93	0.215355	0.91641	0.672917	0.695967	1	3311	tags=16%, list=14%, signal=19%
REACTOME_SIGNALING_BY_THE_B_CELL_RECEPTOR_BCR	REACTOME_SIGNALING_BY_THE_B_CELL_RECEPTOR_BCR		164	0.196724	0.912287	0.69161	0.704331	1	1961	tags=10%, list=8%, signal=11%
REACTOME_REGULATION_OF_RUNX3_EXPRESSION_AND_ACTIVITY	REACTOME_REGULATION_OF_RUNX3_EXPRESSION_AND_ACTIVITY		54	0.233923	0.908883	0.641667	0.711001	1	4421	tags=20%, list=19%, signal=25%
REACTOME_MITOPHAGY	REACTOME_MITOPHAGY		27	0.274896	0.902604	0.583158	0.724082	1	4008	tags=26%, list=17%, signal=31%
REACTOME_OLFACTORY_SIGNALING_PATHWAY	REACTOME_OLFACTORY_SIGNALING_PATHWAY		23	0.289043	0.902561	0.60625	0.723074	1	5932	tags=30%, list=25%, signal=41%
REACTOME_O_GLYCOSYLATION_OF_TSR_DOMAIN_CONTAINING_PROTEINS	REACTOME_O_GLYCOSYLATION_OF_TSR_DOMAIN_CONTAINING_PROTEINS		35	0.258044	0.902124	0.580087	0.722935	1	5067	tags=23%, list=22%, signal=29%
REACTOME_NEF_MEDIATES_DOWN_MODULATION_OF_CELL_SURFACE_RECEPTORS_BY_RECRUITING_THEM_TO_CLATHRIN_ADAPTERS	REACTOME_NEF_MEDIATES_DOWN_MODULATION_OF_CELL_SURFACE_RECEPTORS_BY_RECRUITING_THEM_TO_CLATHRIN_ADAPTERS		21	0.296812	0.897647	0.629712	0.731853	1	530	tags=10%, list=2%, signal=10%
REACTOME_TP53_REGULATES_TRANSCRIPTION_OF_CELL_CYCLE_GENES	REACTOME_TP53_REGULATES_TRANSCRIPTION_OF_CELL_CYCLE_GENES		48	0.240083	0.895849	0.664596	0.734738	1	5760	tags=35%, list=25%, signal=47%
HALLMARK_HEDGEHOG_SIGNALING	HALLMARK_HEDGEHOG_SIGNALING		35	0.254401	0.891589	0.650655	0.743089	1	2041	tags=17%, list=9%, signal=19%
REACTOME_GLUCAGON_LIKE_PEPTIDE_1_GLP1_REGULATES_INSULIN_SECRETION	REACTOME_GLUCAGON_LIKE_PEPTIDE_1_GLP1_REGULATES_INSULIN_SECRETION		35	0.249274	0.884413	0.670782	0.75796	1	6763	tags=40%, list=29%, signal=56%
HALLMARK_SPERMATOGENESIS	HALLMARK_SPERMATOGENESIS		103	0.203687	0.881748	0.731557	0.76267	1	4712	tags=22%, list=20%, signal=28%
REACTOME_BASIGIN_INTERACTIONS	REACTOME_BASIGIN_INTERACTIONS		23	0.279839	0.879468	0.660981	0.766679	1	5154	tags=26%, list=22%, signal=33%
REACTOME_PINK1_PRKN_MEDIATED_MITOPHAGY	REACTOME_PINK1_PRKN_MEDIATED_MITOPHAGY		20	0.290156	0.87934	0.634538	0.765756	1	4008	tags=25%, list=17%, signal=30%
REACTOME_TP53_REGULATES_METABOLIC_GENES	REACTOME_TP53_REGULATES_METABOLIC_GENES		86	0.208211	0.877437	0.711618	0.768557	1	4165	tags=23%, list=18%, signal=28%
REACTOME_ROLE_OF_LAT2_NTAL_LAB_ON_CALCIUM_MOBILIZATION	REACTOME_ROLE_OF_LAT2_NTAL_LAB_ON_CALCIUM_MOBILIZATION		71	0.213846	0.866331	0.73431	0.791295	1	550	tags=6%, list=2%, signal=6%
HALLMARK_APICAL_SURFACE	HALLMARK_APICAL_SURFACE		39	0.240144	0.866239	0.715217	0.790297	1	3678	tags=15%, list=16%, signal=18%
REACTOME_REGULATION_OF_RUNX2_EXPRESSION_AND_ACTIVITY	REACTOME_REGULATION_OF_RUNX2_EXPRESSION_AND_ACTIVITY		70	0.215161	0.860581	0.73913	0.801012	1	4648	tags=21%, list=20%, signal=27%
REACTOME_SIGNAL_REGULATORY_PROTEIN_FAMILY_INTERACTIONS	REACTOME_SIGNAL_REGULATORY_PROTEIN_FAMILY_INTERACTIONS		15	0.304344	0.860177	0.663968	0.800699	1	2905	tags=20%, list=12%, signal=23%
REACTOME_DISEASES_ASSOCIATED_WITH_O_GLYCOSYLATION_OF_PROTEINS	REACTOME_DISEASES_ASSOCIATED_WITH_O_GLYCOSYLATION_OF_PROTEINS		61	0.22049	0.858679	0.720408	0.802658	1	4094	tags=20%, list=18%, signal=24%
REACTOME_ACYL_CHAIN_REMODELLING_OF_PE	REACTOME_ACYL_CHAIN_REMODELLING_OF_PE		16	0.303966	0.85688	0.668	0.805181	1	3233	tags=25%, list=14%, signal=29%
REACTOME_REGULATION_OF_FZD_BY_UBIQUITINATION	REACTOME_REGULATION_OF_FZD_BY_UBIQUITINATION		20	0.284349	0.855238	0.671968	0.807319	1	3164	tags=20%, list=14%, signal=23%
KEGG_DRUG_METABOLISM_OTHER_ENZYMES	KEGG_DRUG_METABOLISM_OTHER_ENZYMES		35	0.240161	0.852015	0.73913	0.812668	1	2795	tags=14%, list=12%, signal=16%
REACTOME_CELLULAR_RESPONSE_TO_CHEMICAL_STRESS	REACTOME_CELLULAR_RESPONSE_TO_CHEMICAL_STRESS		155	0.181003	0.849948	0.863436	0.815674	1	4421	tags=21%, list=19%, signal=25%
REACTOME_FCERI_MEDIATED_NF_KB_ACTIVATION	REACTOME_FCERI_MEDIATED_NF_KB_ACTIVATION		134	0.187098	0.847566	0.841438	0.818986	1	909	tags=7%, list=4%, signal=7%
REACTOME_ACYL_CHAIN_REMODELLING_OF_PC	REACTOME_ACYL_CHAIN_REMODELLING_OF_PC		18	0.284662	0.84585	0.683438	0.821148	1	3233	tags=22%, list=14%, signal=26%
REACTOME_RECOGNITION_OF_DNA_DAMAGE_BY_PCNA_CONTAINING_REPLICATION_COMPLEX	REACTOME_RECOGNITION_OF_DNA_DAMAGE_BY_PCNA_CONTAINING_REPLICATION_COMPLEX		30	0.248619	0.845053	0.723232	0.821477	1	3564	tags=17%, list=15%, signal=20%
REACTOME_ANTIGEN_PROCESSING_CROSS_PRESENTATION	REACTOME_ANTIGEN_PROCESSING_CROSS_PRESENTATION		100	0.197184	0.844705	0.811441	0.82095	1	4670	tags=24%, list=20%, signal=30%
REACTOME_RAS_PROCESSING	REACTOME_RAS_PROCESSING		23	0.260724	0.843566	0.713483	0.821943	1	3194	tags=22%, list=14%, signal=25%
REACTOME_PLATELET_HOMEOSTASIS	REACTOME_PLATELET_HOMEOSTASIS		79	0.203854	0.842012	0.786982	0.823703	1	6431	tags=32%, list=27%, signal=43%
KEGG_CARDIAC_MUSCLE_CONTRACTION	KEGG_CARDIAC_MUSCLE_CONTRACTION		65	0.211571	0.840553	0.801603	0.825398	1	8582	tags=40%, list=37%, signal=63%
REACTOME_POSITIVE_EPIGENETIC_REGULATION_OF_RRNA_EXPRESSION	REACTOME_POSITIVE_EPIGENETIC_REGULATION_OF_RRNA_EXPRESSION		43	0.231475	0.840445	0.75431	0.824377	1	2359	tags=19%, list=10%, signal=21%
REACTOME_SIGNALING_BY_NOTCH1_PEST_DOMAIN_MUTANTS_IN_CANCER	REACTOME_SIGNALING_BY_NOTCH1_PEST_DOMAIN_MUTANTS_IN_CANCER		58	0.212745	0.837172	0.777555	0.829267	1	5261	tags=31%, list=22%, signal=40%
REACTOME_CALNEXIN_CALRETICULIN_CYCLE	REACTOME_CALNEXIN_CALRETICULIN_CYCLE		25	0.260135	0.837036	0.719588	0.828349	1	3164	tags=20%, list=14%, signal=23%
REACTOME_CHOLESTEROL_BIOSYNTHESIS	REACTOME_CHOLESTEROL_BIOSYNTHESIS		24	0.259965	0.83693	0.706612	0.827339	1	2502	tags=21%, list=11%, signal=23%
REACTOME_CYCLIN_D_ASSOCIATED_EVENTS_IN_G1	REACTOME_CYCLIN_D_ASSOCIATED_EVENTS_IN_G1		47	0.224283	0.835659	0.754839	0.828484	1	6422	tags=40%, list=27%, signal=56%
REACTOME_CONSTITUTIVE_SIGNALING_BY_AKT1_E17K_IN_CANCER	REACTOME_CONSTITUTIVE_SIGNALING_BY_AKT1_E17K_IN_CANCER		26	0.254972	0.832637	0.724138	0.832887	1	6640	tags=42%, list=28%, signal=59%
REACTOME_SYNTHESIS_OF_PC	REACTOME_SYNTHESIS_OF_PC		27	0.254438	0.828532	0.736626	0.839047	1	4432	tags=30%, list=19%, signal=37%
REACTOME_IRAK4_DEFICIENCY_TLR2_4	REACTOME_IRAK4_DEFICIENCY_TLR2_4		15	0.288531	0.825541	0.717213	0.84312	1	6055	tags=47%, list=26%, signal=63%
REACTOME_ION_CHANNEL_TRANSPORT	REACTOME_ION_CHANNEL_TRANSPORT		163	0.177333	0.821452	0.919822	0.849148	1	3629	tags=17%, list=16%, signal=19%
REACTOME_ENERGY_DEPENDENT_REGULATION_OF_MTOR_BY_LKB1_AMPK	REACTOME_ENERGY_DEPENDENT_REGULATION_OF_MTOR_BY_LKB1_AMPK		28	0.239833	0.816826	0.744422	0.85569	1	1008	tags=11%, list=4%, signal=11%
REACTOME_NONSENSE_MEDIATED_DECAY_NMD	REACTOME_NONSENSE_MEDIATED_DECAY_NMD		115	0.184189	0.815614	0.907923	0.856524	1	1773	tags=6%, list=8%, signal=7%
REACTOME_BINDING_AND_UPTAKE_OF_LIGANDS_BY_SCAVENGER_RECEPTORS	REACTOME_BINDING_AND_UPTAKE_OF_LIGANDS_BY_SCAVENGER_RECEPTORS		95	0.190498	0.815418	0.887168	0.855614	1	5843	tags=22%, list=25%, signal=29%
REACTOME_CYTOPROTECTION_BY_HMOX1	REACTOME_CYTOPROTECTION_BY_HMOX1		122	0.182351	0.815284	0.885081	0.854611	1	4803	tags=23%, list=21%, signal=29%
REACTOME_B_WICH_COMPLEX_POSITIVELY_REGULATES_RRNA_EXPRESSION	REACTOME_B_WICH_COMPLEX_POSITIVELY_REGULATES_RRNA_EXPRESSION		28	0.243103	0.814458	0.782341	0.854736	1	2357	tags=18%, list=10%, signal=20%
REACTOME_CGMP_EFFECTS	REACTOME_CGMP_EFFECTS		15	0.291314	0.804442	0.743041	0.870192	1	1407	tags=13%, list=6%, signal=14%
HALLMARK_KRAS_SIGNALING_DN	HALLMARK_KRAS_SIGNALING_DN		143	0.176661	0.802653	0.924843	0.87198	1	7633	tags=36%, list=33%, signal=53%
REACTOME_COMPLEMENT_CASCADE	REACTOME_COMPLEMENT_CASCADE		100	0.18625	0.801459	0.907368	0.872581	1	7658	tags=35%, list=33%, signal=52%
REACTOME_FCERI_MEDIATED_MAPK_ACTIVATION	REACTOME_FCERI_MEDIATED_MAPK_ACTIVATION		87	0.192835	0.794741	0.871849	0.881789	1	2307	tags=10%, list=10%, signal=11%
KEGG_GLYCOSAMINOGLYCAN_DEGRADATION	KEGG_GLYCOSAMINOGLYCAN_DEGRADATION		20	0.261241	0.79374	0.775899	0.88208	1	2134	tags=15%, list=9%, signal=16%
REACTOME_MICRORNA_MIRNA_BIOGENESIS	REACTOME_MICRORNA_MIRNA_BIOGENESIS		24	0.247935	0.792504	0.769084	0.882715	1	2106	tags=17%, list=9%, signal=18%
KEGG_REGULATION_OF_AUTOPHAGY	KEGG_REGULATION_OF_AUTOPHAGY		20	0.256827	0.792193	0.738397	0.881918	1	2231	tags=20%, list=10%, signal=22%
KEGG_VIBRIO_CHOLERAE_INFECTION	KEGG_VIBRIO_CHOLERAE_INFECTION		48	0.209067	0.788519	0.852814	0.886147	1	3903	tags=23%, list=17%, signal=27%
REACTOME_SIGNALING_BY_NOTCH4	REACTOME_SIGNALING_BY_NOTCH4		81	0.189842	0.788347	0.908142	0.885127	1	5374	tags=25%, list=23%, signal=32%
REACTOME_RND1_GTPASE_CYCLE	REACTOME_RND1_GTPASE_CYCLE		42	0.214935	0.783381	0.851546	0.890919	1	5267	tags=26%, list=23%, signal=34%
REACTOME_METABOLISM_OF_STEROID_HORMONES	REACTOME_METABOLISM_OF_STEROID_HORMONES		28	0.239783	0.781701	0.819743	0.892078	1	4206	tags=21%, list=18%, signal=26%
REACTOME_RND2_GTPASE_CYCLE	REACTOME_RND2_GTPASE_CYCLE		42	0.213364	0.779111	0.841163	0.894424	1	1697	tags=12%, list=7%, signal=13%
REACTOME_SIGNALING_BY_ROBO_RECEPTORS	REACTOME_SIGNALING_BY_ROBO_RECEPTORS		206	0.162194	0.77867	0.962264	0.893823	1	3348	tags=11%, list=14%, signal=13%
REACTOME_ANTIGEN_PRESENTATION_FOLDING_ASSEMBLY_AND_PEPTIDE_LOADING_OF_CLASS_I_MHC	REACTOME_ANTIGEN_PRESENTATION_FOLDING_ASSEMBLY_AND_PEPTIDE_LOADING_OF_CLASS_I_MHC		25	0.242244	0.778382	0.804305	0.892977	1	4670	tags=32%, list=20%, signal=40%
REACTOME_DEPOSITION_OF_NEW_CENPA_CONTAINING_NUCLEOSOMES_AT_THE_CENTROMERE	REACTOME_DEPOSITION_OF_NEW_CENPA_CONTAINING_NUCLEOSOMES_AT_THE_CENTROMERE		25	0.236334	0.769503	0.820896	0.903393	1	1546	tags=12%, list=7%, signal=13%
REACTOME_METABOLISM_OF_STEROIDS	REACTOME_METABOLISM_OF_STEROIDS		134	0.16809	0.757326	0.959227	0.917184	1	3475	tags=16%, list=15%, signal=19%
REACTOME_NITRIC_OXIDE_STIMULATES_GUANYLATE_CYCLASE	REACTOME_NITRIC_OXIDE_STIMULATES_GUANYLATE_CYCLASE		19	0.244723	0.747827	0.830189	0.926923	1	1407	tags=11%, list=6%, signal=11%
REACTOME_SYNTHESIS_OF_LEUKOTRIENES_LT_AND_EOXINS_EX	REACTOME_SYNTHESIS_OF_LEUKOTRIENES_LT_AND_EOXINS_EX		17	0.247562	0.740946	0.808554	0.93308	1	7004	tags=47%, list=30%, signal=67%
REACTOME_PKA_ACTIVATION_IN_GLUCAGON_SIGNALLING	REACTOME_PKA_ACTIVATION_IN_GLUCAGON_SIGNALLING		15	0.262156	0.739969	0.827586	0.932813	1	6060	tags=40%, list=26%, signal=54%
REACTOME_POLO_LIKE_KINASE_MEDIATED_EVENTS	REACTOME_POLO_LIKE_KINASE_MEDIATED_EVENTS		16	0.257309	0.729211	0.847222	0.942311	1	5155	tags=31%, list=22%, signal=40%
REACTOME_TRANSLESION_SYNTHESIS_BY_POLK	REACTOME_TRANSLESION_SYNTHESIS_BY_POLK		17	0.250515	0.728846	0.839479	0.941369	1	4534	tags=24%, list=19%, signal=29%
REACTOME_SIALIC_ACID_METABOLISM	REACTOME_SIALIC_ACID_METABOLISM		31	0.205614	0.713349	0.912393	0.953957	1	2873	tags=16%, list=12%, signal=18%
KEGG_O_GLYCAN_BIOSYNTHESIS	KEGG_O_GLYCAN_BIOSYNTHESIS		27	0.216632	0.71252	0.895463	0.953322	1	4262	tags=26%, list=18%, signal=32%
REACTOME_INTERLEUKIN_20_FAMILY_SIGNALING	REACTOME_INTERLEUKIN_20_FAMILY_SIGNALING		20	0.23367	0.708796	0.890688	0.955095	1	2773	tags=20%, list=12%, signal=23%
REACTOME_ENDOGENOUS_STEROLS	REACTOME_ENDOGENOUS_STEROLS		21	0.225292	0.699797	0.892276	0.960846	1	63	tags=5%, list=0%, signal=5%
REACTOME_CLASS_B_2_SECRETIN_FAMILY_RECEPTORS	REACTOME_CLASS_B_2_SECRETIN_FAMILY_RECEPTORS		73	0.170265	0.699036	0.965517	0.960058	1	3645	tags=15%, list=16%, signal=18%
REACTOME_GABA_SYNTHESIS_RELEASE_REUPTAKE_AND_DEGRADATION	REACTOME_GABA_SYNTHESIS_RELEASE_REUPTAKE_AND_DEGRADATION		18	0.237249	0.696956	0.866388	0.960266	1	1440	tags=11%, list=6%, signal=12%
REACTOME_NOTCH_HLH_TRANSCRIPTION_PATHWAY	REACTOME_NOTCH_HLH_TRANSCRIPTION_PATHWAY		28	0.207976	0.692321	0.902954	0.962219	1	7530	tags=50%, list=32%, signal=74%
REACTOME_METABOLIC_DISORDERS_OF_BIOLOGICAL_OXIDATION_ENZYMES	REACTOME_METABOLIC_DISORDERS_OF_BIOLOGICAL_OXIDATION_ENZYMES		27	0.215582	0.691137	0.919255	0.961729	1	4206	tags=26%, list=18%, signal=32%
REACTOME_HEDGEHOG_OFF_STATE	REACTOME_HEDGEHOG_OFF_STATE		108	0.159497	0.690291	0.99569	0.961059	1	6329	tags=30%, list=27%, signal=40%
REACTOME_NOTCH2_ACTIVATION_AND_TRANSMISSION_OF_SIGNAL_TO_THE_NUCLEUS	REACTOME_NOTCH2_ACTIVATION_AND_TRANSMISSION_OF_SIGNAL_TO_THE_NUCLEUS		22	0.219538	0.679795	0.912065	0.966614	1	5374	tags=32%, list=23%, signal=41%
REACTOME_GLYCOGEN_BREAKDOWN_GLYCOGENOLYSIS	REACTOME_GLYCOGEN_BREAKDOWN_GLYCOGENOLYSIS		15	0.239917	0.669223	0.896761	0.971437	1	3194	tags=27%, list=14%, signal=31%
REACTOME_INITIAL_TRIGGERING_OF_COMPLEMENT	REACTOME_INITIAL_TRIGGERING_OF_COMPLEMENT		74	0.15864	0.654524	0.997908	0.977866	1	19691	tags=100%, list=84%, signal=630%
REACTOME_FCGR_ACTIVATION	REACTOME_FCGR_ACTIVATION		69	0.158606	0.637952	0.99177	0.983927	1	19691	tags=100%, list=84%, signal=630%
REACTOME_TRP_CHANNELS	REACTOME_TRP_CHANNELS		25	0.190311	0.60886	0.942387	0.992679	1	3107	tags=12%, list=13%, signal=14%
REACTOME_SCAVENGING_OF_HEME_FROM_PLASMA	REACTOME_SCAVENGING_OF_HEME_FROM_PLASMA		67	0.141484	0.5788	1	0.998745	1	19206	tags=99%, list=82%, signal=549%
KEGG_GLUTATHIONE_METABOLISM	KEGG_GLUTATHIONE_METABOLISM		43	0.155836	0.567991	0.993827	0.999459	1	4680	tags=21%, list=20%, signal=26%
REACTOME_FCGR3A_MEDIATED_IL10_SYNTHESIS	REACTOME_FCGR3A_MEDIATED_IL10_SYNTHESIS		93	0.130052	0.554205	1	1	1	4376	tags=15%, list=19%, signal=18%
REACTOME_PIWI_INTERACTING_RNA_PIRNA_BIOGENESIS	REACTOME_PIWI_INTERACTING_RNA_PIRNA_BIOGENESIS		27	0.165083	0.547276	0.995984	0.999825	1	5106	tags=26%, list=22%, signal=33%
REACTOME_ION_TRANSPORT_BY_P_TYPE_ATPASES	REACTOME_ION_TRANSPORT_BY_P_TYPE_ATPASES		51	0.14264	0.538681	0.995842	0.999433	1	6991	tags=33%, list=30%, signal=47%
REACTOME_LONG_TERM_POTENTIATION	REACTOME_LONG_TERM_POTENTIATION		23	0.159667	0.506482	0.989583	1	1	7451	tags=30%, list=32%, signal=45%
REACTOME_UNBLOCKING_OF_NMDA_RECEPTORS_GLUTAMATE_BINDING_AND_ACTIVATION	REACTOME_UNBLOCKING_OF_NMDA_RECEPTORS_GLUTAMATE_BINDING_AND_ACTIVATION		21	0.152503	0.485343	0.99596	1	1	19826	tags=100%, list=85%, signal=656%
REACTOME_NEGATIVE_REGULATION_OF_NMDA_RECEPTOR_MEDIATED_NEURONAL_TRANSMISSION	REACTOME_NEGATIVE_REGULATION_OF_NMDA_RECEPTOR_MEDIATED_NEURONAL_TRANSMISSION		21	0.153102	0.466307	0.995943	1	1	19812	tags=100%, list=85%, signal=653%
REACTOME_EFFECTS_OF_PIP2_HYDROLYSIS	REACTOME_EFFECTS_OF_PIP2_HYDROLYSIS		26	0.13884	0.458054	0.99789	0.999057	1	20146	tags=100%, list=86%, signal=720%

## Sheet: Table S4
Supplementary Table 4. Functional enrichment of RRMM patients with CRBN del10 vs WT CRBN patients in MM-001 cohort
NAME	GS<br> follow link to MSigDB	GS DETAILS	SIZE	ES	NES	NOM p-val	FDR q-val	FWER p-val	RANK AT MAX	LEADING EDGE
HALLMARK_TNFA_SIGNALING_VIA_NFKB	HALLMARK_TNFA_SIGNALING_VIA_NFKB	Details ...	168	0.594985	3.1744	0	0	0	5213	tags=54%, list=22%, signal=69%
REACTOME_INTERLEUKIN_4_AND_INTERLEUKIN_13_SIGNALING	REACTOME_INTERLEUKIN_4_AND_INTERLEUKIN_13_SIGNALING	Details ...	85	0.618056	2.87369	0	0	0	3669	tags=48%, list=15%, signal=57%
REACTOME_ANTIGEN_PRESENTATION_FOLDING_ASSEMBLY_AND_PEPTIDE_LOADING_OF_CLASS_I_MHC	REACTOME_ANTIGEN_PRESENTATION_FOLDING_ASSEMBLY_AND_PEPTIDE_LOADING_OF_CLASS_I_MHC	Details ...	24	0.795001	2.77593	0	0	0	2349	tags=63%, list=10%, signal=69%
REACTOME_NEUTROPHIL_DEGRANULATION	REACTOME_NEUTROPHIL_DEGRANULATION	Details ...	429	0.465176	2.72252	0	0	0	3379	tags=34%, list=14%, signal=39%
HALLMARK_HEME_METABOLISM	HALLMARK_HEME_METABOLISM	Details ...	184	0.508315	2.70844	0	0	0	6009	tags=54%, list=25%, signal=72%
REACTOME_EGFR_DOWNREGULATION	REACTOME_EGFR_DOWNREGULATION	Details ...	29	0.712923	2.66806	0	0	0	4781	tags=62%, list=20%, signal=77%
REACTOME_SIGNALING_BY_INTERLEUKINS	REACTOME_SIGNALING_BY_INTERLEUKINS	Details ...	381	0.444063	2.58139	0	0	0	4234	tags=38%, list=18%, signal=46%
REACTOME_GLYCOSPHINGOLIPID_METABOLISM	REACTOME_GLYCOSPHINGOLIPID_METABOLISM	Details ...	38	0.64715	2.58123	0	0	0	5325	tags=63%, list=22%, signal=81%
HALLMARK_PROTEIN_SECRETION	HALLMARK_PROTEIN_SECRETION	Details ...	91	0.523478	2.52699	0	0	0	4003	tags=43%, list=17%, signal=51%
REACTOME_N_GLYCAN_TRIMMING_IN_THE_ER_AND_CALNEXIN_CALRETICULIN_CYCLE	REACTOME_N_GLYCAN_TRIMMING_IN_THE_ER_AND_CALNEXIN_CALRETICULIN_CYCLE	Details ...	34	0.669947	2.52485	0	0	0	4788	tags=62%, list=20%, signal=77%
REACTOME_CALNEXIN_CALRETICULIN_CYCLE	REACTOME_CALNEXIN_CALRETICULIN_CYCLE	Details ...	25	0.719155	2.49358	0	0	0	4684	tags=60%, list=19%, signal=74%
REACTOME_INFLUENZA_INFECTION	REACTOME_INFLUENZA_INFECTION	Details ...	150	0.483824	2.46201	0	0	0	6352	tags=53%, list=26%, signal=71%
REACTOME_FORMATION_OF_RNA_POL_II_ELONGATION_COMPLEX	REACTOME_FORMATION_OF_RNA_POL_II_ELONGATION_COMPLEX	Details ...	52	0.576559	2.45875	0	0	0	3693	tags=50%, list=15%, signal=59%
REACTOME_ER_TO_GOLGI_ANTEROGRADE_TRANSPORT	REACTOME_ER_TO_GOLGI_ANTEROGRADE_TRANSPORT	Details ...	141	0.477567	2.45723	0	0	0	3783	tags=40%, list=16%, signal=47%
REACTOME_SIGNALING_BY_MET	REACTOME_SIGNALING_BY_MET	Details ...	74	0.530716	2.44015	0	0	0	4781	tags=49%, list=20%, signal=61%
HALLMARK_INFLAMMATORY_RESPONSE	HALLMARK_INFLAMMATORY_RESPONSE	Details ...	160	0.466769	2.43887	0	0	0	6401	tags=53%, list=27%, signal=72%
HALLMARK_CHOLESTEROL_HOMEOSTASIS	HALLMARK_CHOLESTEROL_HOMEOSTASIS	Details ...	68	0.530227	2.42254	0	0	0	5095	tags=44%, list=21%, signal=56%
REACTOME_ASPARAGINE_N_LINKED_GLYCOSYLATION	REACTOME_ASPARAGINE_N_LINKED_GLYCOSYLATION	Details ...	275	0.431508	2.41513	0	0	0	4129	tags=36%, list=17%, signal=43%
REACTOME_SRP_DEPENDENT_COTRANSLATIONAL_PROTEIN_TARGETING_TO_MEMBRANE	REACTOME_SRP_DEPENDENT_COTRANSLATIONAL_PROTEIN_TARGETING_TO_MEMBRANE	Details ...	107	0.490903	2.40103	0	0	0	6545	tags=49%, list=27%, signal=66%
REACTOME_INTERLEUKIN_12_FAMILY_SIGNALING	REACTOME_INTERLEUKIN_12_FAMILY_SIGNALING	Details ...	52	0.557151	2.39748	0	0	0	3009	tags=46%, list=12%, signal=53%
HALLMARK_UNFOLDED_PROTEIN_RESPONSE	HALLMARK_UNFOLDED_PROTEIN_RESPONSE		104	0.482955	2.3727	0	0	0	5930	tags=56%, list=25%, signal=74%
REACTOME_FLT3_SIGNALING_IN_DISEASE	REACTOME_FLT3_SIGNALING_IN_DISEASE		27	0.654268	2.37124	0	0	0	4189	tags=59%, list=17%, signal=72%
REACTOME_COPI_MEDIATED_ANTEROGRADE_TRANSPORT	REACTOME_COPI_MEDIATED_ANTEROGRADE_TRANSPORT		89	0.514719	2.36958	0	0	0	3783	tags=43%, list=16%, signal=50%
REACTOME_ESTROGEN_DEPENDENT_GENE_EXPRESSION	REACTOME_ESTROGEN_DEPENDENT_GENE_EXPRESSION		87	0.500109	2.36189	0	0	0	3636	tags=41%, list=15%, signal=49%
HALLMARK_MTORC1_SIGNALING	HALLMARK_MTORC1_SIGNALING		185	0.446527	2.35887	0	0	0	2484	tags=28%, list=10%, signal=31%
REACTOME_SIGNALING_BY_EGFR_IN_CANCER	REACTOME_SIGNALING_BY_EGFR_IN_CANCER		23	0.688474	2.35675	0	0	0	4092	tags=61%, list=17%, signal=73%
REACTOME_DISEASES_OF_SIGNAL_TRANSDUCTION_BY_GROWTH_FACTOR_RECEPTORS_AND_SECOND_MESSENGERS	REACTOME_DISEASES_OF_SIGNAL_TRANSDUCTION_BY_GROWTH_FACTOR_RECEPTORS_AND_SECOND_MESSENGERS		351	0.41363	2.35618	0	0	0	4233	tags=38%, list=18%, signal=45%
REACTOME_ESR_MEDIATED_SIGNALING	REACTOME_ESR_MEDIATED_SIGNALING		145	0.459649	2.34146	0	0	0	4671	tags=42%, list=19%, signal=52%
KEGG_LYSOSOME	KEGG_LYSOSOME		113	0.475489	2.33804	0	0	0	4291	tags=39%, list=18%, signal=47%
REACTOME_ER_QUALITY_CONTROL_COMPARTMENT_ERQC	REACTOME_ER_QUALITY_CONTROL_COMPARTMENT_ERQC		20	0.6944	2.3288	0	0	0	4684	tags=55%, list=19%, signal=68%
HALLMARK_HYPOXIA	HALLMARK_HYPOXIA		165	0.442379	2.32015	0	8.35926e-05	0.001	5176	tags=43%, list=21%, signal=54%
REACTOME_SIGNALING_BY_FLT3_FUSION_PROTEINS	REACTOME_SIGNALING_BY_FLT3_FUSION_PROTEINS		18	0.684606	2.317	0	8.09803e-05	0.001	2538	tags=50%, list=11%, signal=56%
REACTOME_INFECTION_WITH_MYCOBACTERIUM_TUBERCULOSIS	REACTOME_INFECTION_WITH_MYCOBACTERIUM_TUBERCULOSIS		25	0.636357	2.28612	0	0.000238292	0.003	4684	tags=56%, list=19%, signal=69%
KEGG_SPHINGOLIPID_METABOLISM	KEGG_SPHINGOLIPID_METABOLISM		33	0.59831	2.27625	0	0.000378892	0.005	3516	tags=48%, list=15%, signal=57%
REACTOME_SIGNALING_BY_EGFR	REACTOME_SIGNALING_BY_EGFR		47	0.541089	2.27533	0	0.000368066	0.005	4781	tags=53%, list=20%, signal=66%
HALLMARK_TGF_BETA_SIGNALING	HALLMARK_TGF_BETA_SIGNALING		50	0.53981	2.26907	0	0.000357842	0.005	4586	tags=48%, list=19%, signal=59%
KEGG_JAK_STAT_SIGNALING_PATHWAY	KEGG_JAK_STAT_SIGNALING_PATHWAY		115	0.459581	2.26724	0	0.000348171	0.005	5181	tags=42%, list=21%, signal=53%
KEGG_GLUTATHIONE_METABOLISM	KEGG_GLUTATHIONE_METABOLISM		44	0.552457	2.2601	0	0.000339008	0.005	4023	tags=43%, list=17%, signal=52%
KEGG_VIBRIO_CHOLERAE_INFECTION	KEGG_VIBRIO_CHOLERAE_INFECTION		48	0.549358	2.25734	0	0.000330316	0.005	3063	tags=42%, list=13%, signal=48%
REACTOME_LISTERIA_MONOCYTOGENES_ENTRY_INTO_HOST_CELLS	REACTOME_LISTERIA_MONOCYTOGENES_ENTRY_INTO_HOST_CELLS		19	0.701458	2.25448	0	0.000322058	0.005	4781	tags=68%, list=20%, signal=85%
REACTOME_IRE1ALPHA_ACTIVATES_CHAPERONES	REACTOME_IRE1ALPHA_ACTIVATES_CHAPERONES		46	0.554392	2.25259	0	0.000314203	0.005	4850	tags=52%, list=20%, signal=65%
REACTOME_INTERLEUKIN_12_SIGNALING	REACTOME_INTERLEUKIN_12_SIGNALING		44	0.546318	2.2512	0	0.000306722	0.005	3009	tags=45%, list=12%, signal=52%
REACTOME_SPHINGOLIPID_METABOLISM	REACTOME_SPHINGOLIPID_METABOLISM		76	0.490564	2.24838	0	0.000357643	0.006	3761	tags=39%, list=16%, signal=47%
REACTOME_UNFOLDED_PROTEIN_RESPONSE_UPR	REACTOME_UNFOLDED_PROTEIN_RESPONSE_UPR		83	0.490942	2.23991	0	0.000595237	0.01	5940	tags=59%, list=25%, signal=78%
REACTOME_INTERLEUKIN_10_SIGNALING	REACTOME_INTERLEUKIN_10_SIGNALING		36	0.578642	2.2371	0	0.000582009	0.01	4718	tags=50%, list=20%, signal=62%
KEGG_ALDOSTERONE_REGULATED_SODIUM_REABSORPTION	KEGG_ALDOSTERONE_REGULATED_SODIUM_REABSORPTION		35	0.588951	2.23272	0	0.000621705	0.011	3570	tags=46%, list=15%, signal=54%
REACTOME_TRANSPORT_TO_THE_GOLGI_AND_SUBSEQUENT_MODIFICATION	REACTOME_TRANSPORT_TO_THE_GOLGI_AND_SUBSEQUENT_MODIFICATION		166	0.429314	2.23074	0	0.000608477	0.011	4731	tags=41%, list=20%, signal=51%
REACTOME_INTRACELLULAR_SIGNALING_BY_SECOND_MESSENGERS	REACTOME_INTRACELLULAR_SIGNALING_BY_SECOND_MESSENGERS		274	0.397599	2.22951	0	0.000595801	0.011	3608	tags=34%, list=15%, signal=40%
REACTOME_ANTIGEN_PROCESSING_CROSS_PRESENTATION	REACTOME_ANTIGEN_PROCESSING_CROSS_PRESENTATION		97	0.460204	2.22576	0	0.000632099	0.012	3608	tags=40%, list=15%, signal=47%
REACTOME_REGULATION_OF_HSF1_MEDIATED_HEAT_SHOCK_RESPONSE	REACTOME_REGULATION_OF_HSF1_MEDIATED_HEAT_SHOCK_RESPONSE		74	0.489474	2.22274	0	0.000671416	0.013	3709	tags=39%, list=15%, signal=46%
HALLMARK_IL6_JAK_STAT3_SIGNALING	HALLMARK_IL6_JAK_STAT3_SIGNALING		75	0.489457	2.22004	0	0.000710796	0.014	5409	tags=43%, list=22%, signal=55%
REACTOME_NEGATIVE_REGULATION_OF_MET_ACTIVITY	REACTOME_NEGATIVE_REGULATION_OF_MET_ACTIVITY		20	0.658406	2.21228	0	0.000750337	0.015	4781	tags=65%, list=20%, signal=81%
REACTOME_RESPONSE_OF_MTB_TO_PHAGOCYTOSIS	REACTOME_RESPONSE_OF_MTB_TO_PHAGOCYTOSIS		22	0.640146	2.21053	0	0.00073618	0.015	4684	tags=59%, list=19%, signal=73%
REACTOME_RESPONSE_OF_EIF2AK4_GCN2_TO_AMINO_ACID_DEFICIENCY	REACTOME_RESPONSE_OF_EIF2AK4_GCN2_TO_AMINO_ACID_DEFICIENCY		95	0.461928	2.20608	0	0.000722547	0.015	7377	tags=56%, list=31%, signal=80%
REACTOME_SIGNALING_BY_NUCLEAR_RECEPTORS	REACTOME_SIGNALING_BY_NUCLEAR_RECEPTORS		213	0.399815	2.20473	0	0.000756766	0.016	4951	tags=38%, list=21%, signal=48%
REACTOME_EUKARYOTIC_TRANSLATION_ELONGATION	REACTOME_EUKARYOTIC_TRANSLATION_ELONGATION		88	0.46872	2.19645	0	0.000793479	0.017	6511	tags=47%, list=27%, signal=64%
HALLMARK_UV_RESPONSE_UP	HALLMARK_UV_RESPONSE_UP		141	0.428583	2.18403	0	0.000874136	0.019	3905	tags=35%, list=16%, signal=42%
REACTOME_TRANSCRIPTIONAL_REGULATION_BY_RUNX1	REACTOME_TRANSCRIPTIONAL_REGULATION_BY_RUNX1		163	0.414783	2.1834	0	0.000859065	0.019	3608	tags=33%, list=15%, signal=39%
KEGG_SPLICEOSOME	KEGG_SPLICEOSOME		116	0.441337	2.18188	0	0.000932368	0.021	3990	tags=38%, list=17%, signal=45%
REACTOME_DISEASES_OF_CARBOHYDRATE_METABOLISM	REACTOME_DISEASES_OF_CARBOHYDRATE_METABOLISM		26	0.607291	2.17229	0	0.000960128	0.022	4686	tags=58%, list=19%, signal=72%
REACTOME_SIGNALING_BY_FLT3_ITD_AND_TKD_MUTANTS	REACTOME_SIGNALING_BY_FLT3_ITD_AND_TKD_MUTANTS		15	0.71097	2.16805	0	0.000985412	0.023	1697	tags=47%, list=7%, signal=50%
REACTOME_SIGNALING_BY_ERBB4	REACTOME_SIGNALING_BY_ERBB4		54	0.499103	2.16732	0	0.00101263	0.024	5293	tags=43%, list=22%, signal=54%
REACTOME_TP53_REGULATES_TRANSCRIPTION_OF_DNA_REPAIR_GENES	REACTOME_TP53_REGULATES_TRANSCRIPTION_OF_DNA_REPAIR_GENES		55	0.49295	2.16323	0	0.00112457	0.027	3439	tags=40%, list=14%, signal=47%
REACTOME_CHAPERONE_MEDIATED_AUTOPHAGY	REACTOME_CHAPERONE_MEDIATED_AUTOPHAGY		19	0.656641	2.16319	0	0.001107	0.027	5226	tags=58%, list=22%, signal=74%
KEGG_LEISHMANIA_INFECTION	KEGG_LEISHMANIA_INFECTION		60	0.499613	2.16249	0	0.00108997	0.027	4585	tags=43%, list=19%, signal=53%
REACTOME_TRANSCRIPTIONAL_REGULATION_BY_THE_AP_2_TFAP2_FAMILY_OF_TRANSCRIPTION_FACTORS	REACTOME_TRANSCRIPTIONAL_REGULATION_BY_THE_AP_2_TFAP2_FAMILY_OF_TRANSCRIPTION_FACTORS		28	0.584077	2.15542	0	0.00111003	0.028	4344	tags=50%, list=18%, signal=61%
REACTOME_CARGO_CONCENTRATION_IN_THE_ER	REACTOME_CARGO_CONCENTRATION_IN_THE_ER		31	0.587053	2.14955	0	0.00124664	0.031	3580	tags=48%, list=15%, signal=57%
REACTOME_CONSTITUTIVE_SIGNALING_BY_LIGAND_RESPONSIVE_EGFR_CANCER_VARIANTS	REACTOME_CONSTITUTIVE_SIGNALING_BY_LIGAND_RESPONSIVE_EGFR_CANCER_VARIANTS		18	0.665136	2.14929	0	0.00122831	0.031	3885	tags=56%, list=16%, signal=66%
REACTOME_GENE_AND_PROTEIN_EXPRESSION_BY_JAK_STAT_SIGNALING_AFTER_INTERLEUKIN_12_STIMULATION	REACTOME_GENE_AND_PROTEIN_EXPRESSION_BY_JAK_STAT_SIGNALING_AFTER_INTERLEUKIN_12_STIMULATION		36	0.553965	2.1467	0	0.00124934	0.032	3434	tags=50%, list=14%, signal=58%
KEGG_RIBOSOME	KEGG_RIBOSOME		83	0.452476	2.14616	0	0.0012315	0.032	7377	tags=54%, list=31%, signal=78%
REACTOME_GOLGI_TO_ER_RETROGRADE_TRANSPORT	REACTOME_GOLGI_TO_ER_RETROGRADE_TRANSPORT		116	0.428708	2.14221	0	0.00128761	0.034	3124	tags=32%, list=13%, signal=36%
REACTOME_CIRCADIAN_CLOCK	REACTOME_CIRCADIAN_CLOCK		64	0.481689	2.14167	0	0.00126973	0.034	5139	tags=52%, list=21%, signal=65%
REACTOME_SIGNALING_BY_FGFR3	REACTOME_SIGNALING_BY_FGFR3		30	0.570994	2.14014	0	0.00128848	0.035	3558	tags=53%, list=15%, signal=62%
KEGG_APOPTOSIS	KEGG_APOPTOSIS		74	0.467489	2.13857	0	0.00127107	0.035	3227	tags=36%, list=13%, signal=42%
REACTOME_CARGO_RECOGNITION_FOR_CLATHRIN_MEDIATED_ENDOCYTOSIS	REACTOME_CARGO_RECOGNITION_FOR_CLATHRIN_MEDIATED_ENDOCYTOSIS		94	0.448953	2.1367	0	0.00125412	0.035	5714	tags=48%, list=24%, signal=63%
HALLMARK_APOPTOSIS	HALLMARK_APOPTOSIS		147	0.413268	2.13635	0	0.00123762	0.035	4909	tags=37%, list=20%, signal=47%
REACTOME_SELENOAMINO_ACID_METABOLISM	REACTOME_SELENOAMINO_ACID_METABOLISM		102	0.434709	2.13485	0	0.00122154	0.035	6352	tags=45%, list=26%, signal=61%
REACTOME_RAF_INDEPENDENT_MAPK1_3_ACTIVATION	REACTOME_RAF_INDEPENDENT_MAPK1_3_ACTIVATION		21	0.624133	2.12701	0	0.00133833	0.039	3725	tags=52%, list=15%, signal=62%
REACTOME_RAB_REGULATION_OF_TRAFFICKING	REACTOME_RAB_REGULATION_OF_TRAFFICKING		112	0.432319	2.12687	0	0.00132138	0.039	4106	tags=42%, list=17%, signal=50%
REACTOME_DOWNREGULATION_OF_TGF_BETA_RECEPTOR_SIGNALING	REACTOME_DOWNREGULATION_OF_TGF_BETA_RECEPTOR_SIGNALING		26	0.590634	2.119	0	0.00146984	0.044	4684	tags=58%, list=19%, signal=72%
HALLMARK_PI3K_AKT_MTOR_SIGNALING	HALLMARK_PI3K_AKT_MTOR_SIGNALING		95	0.447869	2.11355	0	0.00151719	0.046	3306	tags=35%, list=14%, signal=40%
KEGG_PROSTATE_CANCER	KEGG_PROSTATE_CANCER		79	0.460759	2.11283	0	0.00149868	0.046	3882	tags=37%, list=16%, signal=44%
REACTOME_ABC_FAMILY_PROTEINS_MEDIATED_TRANSPORT	REACTOME_ABC_FAMILY_PROTEINS_MEDIATED_TRANSPORT		96	0.442091	2.10917	0	0.00154303	0.048	4103	tags=41%, list=17%, signal=49%
REACTOME_TRANS_GOLGI_NETWORK_VESICLE_BUDDING	REACTOME_TRANS_GOLGI_NETWORK_VESICLE_BUDDING		68	0.466878	2.1082	0	0.00152466	0.048	5633	tags=54%, list=23%, signal=71%
REACTOME_NONSENSE_MEDIATED_DECAY_NMD	REACTOME_NONSENSE_MEDIATED_DECAY_NMD		110	0.424459	2.10712	0	0.0015694	0.05	6352	tags=45%, list=26%, signal=60%
REACTOME_SUMOYLATION_OF_DNA_DAMAGE_RESPONSE_AND_REPAIR_PROTEINS	REACTOME_SUMOYLATION_OF_DNA_DAMAGE_RESPONSE_AND_REPAIR_PROTEINS		74	0.464241	2.10704	0	0.00155116	0.05	3047	tags=31%, list=13%, signal=35%
KEGG_PROTEIN_EXPORT	KEGG_PROTEIN_EXPORT		22	0.611271	2.10253	0	0.00168263	0.054	1540	tags=36%, list=6%, signal=39%
REACTOME_DISORDERS_OF_TRANSMEMBRANE_TRANSPORTERS	REACTOME_DISORDERS_OF_TRANSMEMBRANE_TRANSPORTERS		149	0.411258	2.10211	0	0.00169311	0.055	5471	tags=46%, list=23%, signal=59%
REACTOME_TRANSPORT_OF_MATURE_MRNAS_DERIVED_FROM_INTRONLESS_TRANSCRIPTS	REACTOME_TRANSPORT_OF_MATURE_MRNAS_DERIVED_FROM_INTRONLESS_TRANSCRIPTS		42	0.510835	2.09921	0	0.00173379	0.057	6660	tags=67%, list=28%, signal=92%
REACTOME_COPII_MEDIATED_VESICLE_TRANSPORT	REACTOME_COPII_MEDIATED_VESICLE_TRANSPORT		67	0.474976	2.09903	0	0.00171453	0.057	3783	tags=40%, list=16%, signal=48%
REACTOME_RAB_GERANYLGERANYLATION	REACTOME_RAB_GERANYLGERANYLATION		53	0.498305	2.09315	0	0.00178234	0.06	1787	tags=34%, list=7%, signal=37%
REACTOME_PI_METABOLISM	REACTOME_PI_METABOLISM		80	0.448361	2.09241	0	0.00176297	0.06	3951	tags=33%, list=16%, signal=39%
REACTOME_TGF_BETA_RECEPTOR_SIGNALING_ACTIVATES_SMADS	REACTOME_TGF_BETA_RECEPTOR_SIGNALING_ACTIVATES_SMADS		32	0.551437	2.087	0	0.00174401	0.06	4684	tags=53%, list=19%, signal=66%
HALLMARK_MITOTIC_SPINDLE	HALLMARK_MITOTIC_SPINDLE		188	0.387254	2.08334	0	0.00175466	0.061	4730	tags=35%, list=20%, signal=43%
REACTOME_NUCLEAR_EVENTS_KINASE_AND_TRANSCRIPTION_FACTOR_ACTIVATION	REACTOME_NUCLEAR_EVENTS_KINASE_AND_TRANSCRIPTION_FACTOR_ACTIVATION		54	0.48483	2.08215	0.00293255	0.00173619	0.061	5287	tags=56%, list=22%, signal=71%
REACTOME_SIGNALING_BY_RECEPTOR_TYROSINE_KINASES	REACTOME_SIGNALING_BY_RECEPTOR_TYROSINE_KINASES		445	0.359121	2.08181	0	0.00180022	0.064	4216	tags=32%, list=17%, signal=38%
REACTOME_GAB1_SIGNALOSOME	REACTOME_GAB1_SIGNALOSOME		16	0.670388	2.08077	0	0.00180666	0.065	2363	tags=50%, list=10%, signal=55%
REACTOME_TNF_SIGNALING	REACTOME_TNF_SIGNALING		41	0.503476	2.07822	0	0.00184263	0.067	5403	tags=54%, list=22%, signal=69%
REACTOME_RAB_GEFS_EXCHANGE_GTP_FOR_GDP_ON_RABS	REACTOME_RAB_GEFS_EXCHANGE_GTP_FOR_GDP_ON_RABS		83	0.443603	2.07562	0	0.00190158	0.069	4106	tags=46%, list=17%, signal=55%
REACTOME_P75NTR_SIGNALS_VIA_NF_KB	REACTOME_P75NTR_SIGNALS_VIA_NF_KB		15	0.65786	2.07444	0	0.00188257	0.069	3621	tags=60%, list=15%, signal=71%
REACTOME_CELLULAR_SENESCENCE	REACTOME_CELLULAR_SENESCENCE		121	0.411869	2.07432	0	0.00186393	0.069	3862	tags=36%, list=16%, signal=42%
REACTOME_SIGNALING_BY_PDGFR_IN_DISEASE	REACTOME_SIGNALING_BY_PDGFR_IN_DISEASE		19	0.619023	2.07199	0	0.00187043	0.07	2272	tags=42%, list=9%, signal=46%
REACTOME_SARS_COV_INFECTIONS	REACTOME_SARS_COV_INFECTIONS		136	0.406778	2.07132	0	0.00185227	0.07	5064	tags=40%, list=21%, signal=51%
KEGG_VIRAL_MYOCARDITIS	KEGG_VIRAL_MYOCARDITIS		63	0.473082	2.07013	0	0.00183446	0.07	2142	tags=24%, list=9%, signal=26%
REACTOME_INTRA_GOLGI_AND_RETROGRADE_GOLGI_TO_ER_TRAFFIC	REACTOME_INTRA_GOLGI_AND_RETROGRADE_GOLGI_TO_ER_TRAFFIC		178	0.394131	2.06344	0	0.00201511	0.078	3497	tags=32%, list=15%, signal=37%
REACTOME_CELLULAR_RESPONSE_TO_HEAT_STRESS	REACTOME_CELLULAR_RESPONSE_TO_HEAT_STRESS		92	0.439148	2.06122	0	0.0019961	0.078	3709	tags=36%, list=15%, signal=42%
HALLMARK_ANDROGEN_RESPONSE	HALLMARK_ANDROGEN_RESPONSE		87	0.438797	2.06049	0	0.00202494	0.08	2536	tags=26%, list=11%, signal=29%
REACTOME_NOTCH1_INTRACELLULAR_DOMAIN_REGULATES_TRANSCRIPTION	REACTOME_NOTCH1_INTRACELLULAR_DOMAIN_REGULATES_TRANSCRIPTION		46	0.503762	2.05943	0	0.00203074	0.081	4825	tags=43%, list=20%, signal=54%
REACTOME_SELECTIVE_AUTOPHAGY	REACTOME_SELECTIVE_AUTOPHAGY		67	0.456507	2.05486	0	0.00210606	0.085	4684	tags=42%, list=19%, signal=52%
KEGG_OTHER_GLYCAN_DEGRADATION	KEGG_OTHER_GLYCAN_DEGRADATION		15	0.671532	2.05272	0	0.00213324	0.087	3516	tags=67%, list=15%, signal=78%
REACTOME_COPI_DEPENDENT_GOLGI_TO_ER_RETROGRADE_TRAFFIC	REACTOME_COPI_DEPENDENT_GOLGI_TO_ER_RETROGRADE_TRAFFIC		84	0.431935	2.04984	0	0.00220798	0.091	3124	tags=31%, list=13%, signal=35%
REACTOME_SIGNALING_BY_CSF3_G_CSF	REACTOME_SIGNALING_BY_CSF3_G_CSF		27	0.553363	2.04901	0	0.00225987	0.094	6238	tags=56%, list=26%, signal=75%
REACTOME_CLATHRIN_MEDIATED_ENDOCYTOSIS	REACTOME_CLATHRIN_MEDIATED_ENDOCYTOSIS		131	0.41714	2.04733	0	0.00230936	0.097	4102	tags=36%, list=17%, signal=43%
REACTOME_INTERFERON_SIGNALING	REACTOME_INTERFERON_SIGNALING		177	0.387406	2.04615	0	0.00231143	0.097	4519	tags=37%, list=19%, signal=45%
REACTOME_SIGNALING_BY_FGFR4	REACTOME_SIGNALING_BY_FGFR4		28	0.560277	2.04365	0	0.00235777	0.099	3558	tags=50%, list=15%, signal=59%
REACTOME_THE_NLRP3_INFLAMMASOME	REACTOME_THE_NLRP3_INFLAMMASOME		16	0.623114	2.03883	0	0.00245076	0.104	4678	tags=63%, list=19%, signal=78%
REACTOME_INTERLEUKIN_3_INTERLEUKIN_5_AND_GM_CSF_SIGNALING	REACTOME_INTERLEUKIN_3_INTERLEUKIN_5_AND_GM_CSF_SIGNALING		44	0.505564	2.03612	0	0.00247475	0.106	4684	tags=41%, list=19%, signal=51%
KEGG_FC_GAMMA_R_MEDIATED_PHAGOCYTOSIS	KEGG_FC_GAMMA_R_MEDIATED_PHAGOCYTOSIS		91	0.426683	2.03394	0	0.00247509	0.107	3882	tags=37%, list=16%, signal=44%
REACTOME_RIPK1_MEDIATED_REGULATED_NECROSIS	REACTOME_RIPK1_MEDIATED_REGULATED_NECROSIS		27	0.571993	2.03086	0.00254453	0.00263166	0.114	5355	tags=56%, list=22%, signal=71%
KEGG_PATHWAYS_IN_CANCER	KEGG_PATHWAYS_IN_CANCER		272	0.362823	2.03004	0	0.00265365	0.116	3205	tags=25%, list=13%, signal=29%
REACTOME_PRE_NOTCH_EXPRESSION_AND_PROCESSING	REACTOME_PRE_NOTCH_EXPRESSION_AND_PROCESSING		47	0.492203	2.02991	0.00284091	0.00263172	0.116	3900	tags=36%, list=16%, signal=43%
REACTOME_SIGNALING_BY_TGF_BETA_RECEPTOR_COMPLEX	REACTOME_SIGNALING_BY_TGF_BETA_RECEPTOR_COMPLEX		70	0.458027	2.02984	0	0.00261015	0.116	4684	tags=44%, list=19%, signal=55%
KEGG_B_CELL_RECEPTOR_SIGNALING_PATHWAY	KEGG_B_CELL_RECEPTOR_SIGNALING_PATHWAY		70	0.447107	2.02947	0	0.00258893	0.116	3882	tags=39%, list=16%, signal=46%
REACTOME_NEPHRIN_FAMILY_INTERACTIONS	REACTOME_NEPHRIN_FAMILY_INTERACTIONS		20	0.623288	2.02914	0	0.00258949	0.117	4028	tags=50%, list=17%, signal=60%
REACTOME_GLUCOSE_METABOLISM	REACTOME_GLUCOSE_METABOLISM		79	0.442131	2.02787	0	0.00263216	0.12	3904	tags=37%, list=16%, signal=44%
REACTOME_SIGNALING_BY_HIPPO	REACTOME_SIGNALING_BY_HIPPO		20	0.60511	2.02424	0	0.00279549	0.127	1614	tags=35%, list=7%, signal=37%
REACTOME_FOXO_MEDIATED_TRANSCRIPTION	REACTOME_FOXO_MEDIATED_TRANSCRIPTION		53	0.47434	2.02419	0	0.00277348	0.127	2588	tags=38%, list=11%, signal=42%
HALLMARK_P53_PATHWAY	HALLMARK_P53_PATHWAY		172	0.393987	2.02209	0	0.00283277	0.131	5428	tags=43%, list=23%, signal=55%
REACTOME_AUTOPHAGY	REACTOME_AUTOPHAGY		131	0.396213	2.01932	0	0.00291222	0.136	4684	tags=39%, list=19%, signal=48%
REACTOME_NS1_MEDIATED_EFFECTS_ON_HOST_PATHWAYS	REACTOME_NS1_MEDIATED_EFFECTS_ON_HOST_PATHWAYS		39	0.515605	2.01431	0	0.00301141	0.141	6626	tags=67%, list=27%, signal=92%
KEGG_NATURAL_KILLER_CELL_MEDIATED_CYTOTOXICITY	KEGG_NATURAL_KILLER_CELL_MEDIATED_CYTOTOXICITY		107	0.418115	2.01127	0	0.00321126	0.151	4052	tags=30%, list=17%, signal=36%
REACTOME_HSP90_CHAPERONE_CYCLE_FOR_STEROID_HORMONE_RECEPTORS_SHR	REACTOME_HSP90_CHAPERONE_CYCLE_FOR_STEROID_HORMONE_RECEPTORS_SHR		45	0.486663	2.00936	0	0.00324594	0.154	5920	tags=58%, list=25%, signal=76%
REACTOME_INTERLEUKIN_17_SIGNALING	REACTOME_INTERLEUKIN_17_SIGNALING		64	0.458613	2.00491	0	0.00335744	0.159	4684	tags=45%, list=19%, signal=56%
REACTOME_INTERLEUKIN_RECEPTOR_SHC_SIGNALING	REACTOME_INTERLEUKIN_RECEPTOR_SHC_SIGNALING		23	0.58416	2.0047	0	0.00335303	0.16	4189	tags=43%, list=17%, signal=53%
REACTOME_TRANSCRIPTIONAL_REGULATION_BY_TP53	REACTOME_TRANSCRIPTIONAL_REGULATION_BY_TP53		336	0.349325	2.00447	0	0.0033282	0.16	3846	tags=33%, list=16%, signal=39%
REACTOME_TRANSCRIPTION_OF_THE_HIV_GENOME	REACTOME_TRANSCRIPTION_OF_THE_HIV_GENOME		62	0.464987	2.00436	0	0.00330373	0.16	4567	tags=45%, list=19%, signal=56%
REACTOME_C_TYPE_LECTIN_RECEPTORS_CLRS	REACTOME_C_TYPE_LECTIN_RECEPTORS_CLRS		129	0.394873	2.00199	0	0.00335544	0.163	4001	tags=36%, list=17%, signal=43%
REACTOME_ABC_TRANSPORTER_DISORDERS	REACTOME_ABC_TRANSPORTER_DISORDERS		72	0.431454	2.00045	0	0.00335039	0.164	4103	tags=43%, list=17%, signal=52%
REACTOME_TOLL_LIKE_RECEPTOR_TLR1_TLR2_CASCADE	REACTOME_TOLL_LIKE_RECEPTOR_TLR1_TLR2_CASCADE		92	0.417703	1.99996	0	0.00332629	0.164	3946	tags=39%, list=16%, signal=47%
REACTOME_SUMOYLATION	REACTOME_SUMOYLATION		163	0.381071	1.99795	0	0.00339709	0.169	3047	tags=28%, list=13%, signal=32%
REACTOME_SIGNALING_BY_NTRKS	REACTOME_SIGNALING_BY_NTRKS		117	0.406339	1.99522	0	0.00341016	0.17	3862	tags=37%, list=16%, signal=44%
REACTOME_SYNTHESIS_OF_LEUKOTRIENES_LT_AND_EOXINS_EX	REACTOME_SYNTHESIS_OF_LEUKOTRIENES_LT_AND_EOXINS_EX		17	0.623578	1.99095	0.00260417	0.00353038	0.176	3188	tags=53%, list=13%, signal=61%
REACTOME_MAPK_FAMILY_SIGNALING_CASCADES	REACTOME_MAPK_FAMILY_SIGNALING_CASCADES		282	0.34999	1.99	0	0.0035426	0.178	4182	tags=33%, list=17%, signal=39%
REACTOME_TRANSPORT_OF_THE_SLBP_DEPENDANT_MATURE_MRNA	REACTOME_TRANSPORT_OF_THE_SLBP_DEPENDANT_MATURE_MRNA		35	0.513216	1.98755	0	0.00364612	0.183	6660	tags=69%, list=28%, signal=95%
REACTOME_DEUBIQUITINATION	REACTOME_DEUBIQUITINATION		223	0.364436	1.98728	0	0.00362098	0.183	4328	tags=37%, list=18%, signal=44%
REACTOME_CYCLIN_D_ASSOCIATED_EVENTS_IN_G1	REACTOME_CYCLIN_D_ASSOCIATED_EVENTS_IN_G1		46	0.482987	1.98582	0	0.003651	0.186	3734	tags=37%, list=15%, signal=44%
REACTOME_SUMOYLATION_OF_SUMOYLATION_PROTEINS	REACTOME_SUMOYLATION_OF_SUMOYLATION_PROTEINS		34	0.512418	1.98198	0	0.00369728	0.189	2959	tags=38%, list=12%, signal=44%
REACTOME_ANTIVIRAL_MECHANISM_BY_IFN_STIMULATED_GENES	REACTOME_ANTIVIRAL_MECHANISM_BY_IFN_STIMULATED_GENES		79	0.435057	1.9815	0	0.0036723	0.189	5386	tags=47%, list=22%, signal=60%
KEGG_LEUKOCYTE_TRANSENDOTHELIAL_MIGRATION	KEGG_LEUKOCYTE_TRANSENDOTHELIAL_MIGRATION		100	0.41216	1.98103	0	0.00364766	0.189	2262	tags=23%, list=9%, signal=25%
REACTOME_DISEASES_OF_METABOLISM	REACTOME_DISEASES_OF_METABOLISM		197	0.371667	1.9809	0	0.00362334	0.189	4800	tags=32%, list=20%, signal=40%
REACTOME_CELL_SURFACE_INTERACTIONS_AT_THE_VASCULAR_WALL	REACTOME_CELL_SURFACE_INTERACTIONS_AT_THE_VASCULAR_WALL		175	0.376351	1.97706	0	0.00373684	0.196	3633	tags=23%, list=15%, signal=27%
REACTOME_SIGNALING_BY_ERBB2_IN_CANCER	REACTOME_SIGNALING_BY_ERBB2_IN_CANCER		23	0.575035	1.9768	0	0.00371225	0.196	4710	tags=57%, list=20%, signal=70%
KEGG_ENDOCYTOSIS	KEGG_ENDOCYTOSIS		163	0.387818	1.97633	0	0.00368799	0.196	4102	tags=33%, list=17%, signal=40%
REACTOME_METABOLISM_OF_CARBOHYDRATES	REACTOME_METABOLISM_OF_CARBOHYDRATES		238	0.358182	1.97542	0	0.00369732	0.198	4686	tags=31%, list=19%, signal=38%
REACTOME_TRANSCRIPTIONAL_REGULATION_BY_RUNX3	REACTOME_TRANSCRIPTIONAL_REGULATION_BY_RUNX3		93	0.418779	1.97478	0	0.00368985	0.199	3608	tags=35%, list=15%, signal=42%
REACTOME_SIGNALING_BY_FGFR1	REACTOME_SIGNALING_BY_FGFR1		34	0.512826	1.96966	0	0.00380235	0.204	3558	tags=44%, list=15%, signal=52%
REACTOME_REGULATION_OF_RUNX1_EXPRESSION_AND_ACTIVITY	REACTOME_REGULATION_OF_RUNX1_EXPRESSION_AND_ACTIVITY		17	0.616492	1.96707	0.00246305	0.00384477	0.208	2531	tags=35%, list=11%, signal=39%
REACTOME_SIGNALING_BY_ERBB2	REACTOME_SIGNALING_BY_ERBB2		47	0.479345	1.96637	0	0.00385326	0.21	2588	tags=38%, list=11%, signal=43%
REACTOME_TRANSLOCATION_OF_SLC2A4_GLUT4_TO_THE_PLASMA_MEMBRANE	REACTOME_TRANSLOCATION_OF_SLC2A4_GLUT4_TO_THE_PLASMA_MEMBRANE		60	0.446182	1.96489	0	0.0039104	0.213	2588	tags=30%, list=11%, signal=34%
REACTOME_DAP12_INTERACTIONS	REACTOME_DAP12_INTERACTIONS		38	0.501363	1.96274	0	0.0039649	0.218	2231	tags=29%, list=9%, signal=32%
REACTOME_SPRY_REGULATION_OF_FGF_SIGNALING	REACTOME_SPRY_REGULATION_OF_FGF_SIGNALING		15	0.649162	1.96251	0.00250627	0.00395625	0.219	3558	tags=60%, list=15%, signal=70%
REACTOME_HIV_INFECTION	REACTOME_HIV_INFECTION		218	0.363179	1.9621	0	0.00396476	0.219	3859	tags=33%, list=16%, signal=40%
REACTOME_SUMOYLATION_OF_RNA_BINDING_PROTEINS	REACTOME_SUMOYLATION_OF_RNA_BINDING_PROTEINS		46	0.468568	1.96103	0	0.00395579	0.22	1543	tags=26%, list=6%, signal=28%
KEGG_ADHERENS_JUNCTION	KEGG_ADHERENS_JUNCTION		64	0.439909	1.96029	0.00287356	0.00393167	0.22	4115	tags=33%, list=17%, signal=39%
REACTOME_AGGREPHAGY	REACTOME_AGGREPHAGY		32	0.51419	1.9594	0	0.0039395	0.22	5920	tags=56%, list=25%, signal=74%
REACTOME_INTERLEUKIN_2_FAMILY_SIGNALING	REACTOME_INTERLEUKIN_2_FAMILY_SIGNALING		38	0.486024	1.95912	0	0.00393309	0.221	3592	tags=29%, list=15%, signal=34%
REACTOME_RHOD_GTPASE_CYCLE	REACTOME_RHOD_GTPASE_CYCLE		50	0.470835	1.95863	0	0.00390954	0.221	4286	tags=46%, list=18%, signal=56%
REACTOME_NEGATIVE_REGULATION_OF_FGFR4_SIGNALING	REACTOME_NEGATIVE_REGULATION_OF_FGFR4_SIGNALING		19	0.585359	1.95849	0	0.00390218	0.222	3558	tags=53%, list=15%, signal=62%
KEGG_CELL_CYCLE	KEGG_CELL_CYCLE		120	0.393117	1.95646	0	0.00392567	0.225	3115	tags=29%, list=13%, signal=33%
KEGG_PENTOSE_PHOSPHATE_PATHWAY	KEGG_PENTOSE_PHOSPHATE_PATHWAY		22	0.561526	1.95227	0	0.00404078	0.232	2419	tags=36%, list=10%, signal=40%
REACTOME_RAC3_GTPASE_CYCLE	REACTOME_RAC3_GTPASE_CYCLE		86	0.409221	1.95202	0	0.00403227	0.233	2403	tags=28%, list=10%, signal=31%
REACTOME_RND1_GTPASE_CYCLE	REACTOME_RND1_GTPASE_CYCLE		39	0.492676	1.9517	0	0.00403984	0.234	2256	tags=28%, list=9%, signal=31%
REACTOME_NEGATIVE_REGULATION_OF_THE_PI3K_AKT_NETWORK	REACTOME_NEGATIVE_REGULATION_OF_THE_PI3K_AKT_NETWORK		96	0.404813	1.95096	0	0.0040463	0.236	4774	tags=42%, list=20%, signal=52%
REACTOME_AUF1_HNRNP_D0_BINDS_AND_DESTABILIZES_MRNA	REACTOME_AUF1_HNRNP_D0_BINDS_AND_DESTABILIZES_MRNA		53	0.452027	1.95045	0	0.00405428	0.238	4001	tags=47%, list=17%, signal=56%
REACTOME_REGULATION_OF_RUNX3_EXPRESSION_AND_ACTIVITY	REACTOME_REGULATION_OF_RUNX3_EXPRESSION_AND_ACTIVITY		54	0.462759	1.95045	0	0.00403111	0.238	3608	tags=44%, list=15%, signal=52%
REACTOME_SYNTHESIS_OF_PIPS_AT_THE_PLASMA_MEMBRANE	REACTOME_SYNTHESIS_OF_PIPS_AT_THE_PLASMA_MEMBRANE		53	0.451458	1.94973	0	0.00402347	0.239	3468	tags=30%, list=14%, signal=35%
REACTOME_RHO_GTPASE_CYCLE	REACTOME_RHO_GTPASE_CYCLE		408	0.330918	1.94967	0	0.00400074	0.239	4196	tags=28%, list=17%, signal=34%
KEGG_ANTIGEN_PROCESSING_AND_PRESENTATION	KEGG_ANTIGEN_PROCESSING_AND_PRESENTATION		65	0.435983	1.94577	0	0.00415437	0.249	2734	tags=29%, list=11%, signal=33%
REACTOME_HIV_TRANSCRIPTION_ELONGATION	REACTOME_HIV_TRANSCRIPTION_ELONGATION		37	0.510878	1.94552	0	0.00413116	0.249	3439	tags=43%, list=14%, signal=50%
REACTOME_HIV_ELONGATION_ARREST_AND_RECOVERY	REACTOME_HIV_ELONGATION_ARREST_AND_RECOVERY		28	0.52319	1.94049	0	0.00429695	0.259	5029	tags=54%, list=21%, signal=68%
REACTOME_SIGNALING_BY_FGFR	REACTOME_SIGNALING_BY_FGFR		66	0.430777	1.94007	0	0.0043166	0.262	3738	tags=39%, list=16%, signal=46%
REACTOME_RUNX1_REGULATES_GENES_INVOLVED_IN_MEGAKARYOCYTE_DIFFERENTIATION_AND_PLATELET_FUNCTION	REACTOME_RUNX1_REGULATES_GENES_INVOLVED_IN_MEGAKARYOCYTE_DIFFERENTIATION_AND_PLATELET_FUNCTION		35	0.505475	1.93858	0	0.00439227	0.268	4449	tags=46%, list=18%, signal=56%
REACTOME_REGULATION_OF_RUNX2_EXPRESSION_AND_ACTIVITY	REACTOME_REGULATION_OF_RUNX2_EXPRESSION_AND_ACTIVITY		66	0.431536	1.93786	0	0.00445353	0.271	3608	tags=41%, list=15%, signal=48%
KEGG_INSULIN_SIGNALING_PATHWAY	KEGG_INSULIN_SIGNALING_PATHWAY		113	0.394936	1.93778	0	0.00444341	0.271	3684	tags=34%, list=15%, signal=40%
REACTOME_REGULATION_OF_MECP2_EXPRESSION_AND_ACTIVITY	REACTOME_REGULATION_OF_MECP2_EXPRESSION_AND_ACTIVITY		30	0.520633	1.93749	0	0.0044194	0.271	2531	tags=33%, list=11%, signal=37%
REACTOME_HIV_LIFE_CYCLE	REACTOME_HIV_LIFE_CYCLE		138	0.383037	1.93641	0	0.0044678	0.272	3859	tags=35%, list=16%, signal=41%
REACTOME_PROCESSING_OF_CAPPED_INTRON_CONTAINING_PRE_MRNA	REACTOME_PROCESSING_OF_CAPPED_INTRON_CONTAINING_PRE_MRNA		228	0.356007	1.93452	0	0.00457932	0.279	3990	tags=34%, list=17%, signal=40%
REACTOME_DISASSEMBLY_OF_THE_DESTRUCTION_COMPLEX_AND_RECRUITMENT_OF_AXIN_TO_THE_MEMBRANE	REACTOME_DISASSEMBLY_OF_THE_DESTRUCTION_COMPLEX_AND_RECRUITMENT_OF_AXIN_TO_THE_MEMBRANE		23	0.550216	1.93392	0.00262467	0.0046101	0.282	3402	tags=52%, list=14%, signal=61%
REACTOME_REGULATION_OF_EXPRESSION_OF_SLITS_AND_ROBOS	REACTOME_REGULATION_OF_EXPRESSION_OF_SLITS_AND_ROBOS		157	0.369776	1.93366	0	0.00461315	0.284	4823	tags=34%, list=20%, signal=43%
REACTOME_NEGATIVE_REGULATION_OF_FGFR3_SIGNALING	REACTOME_NEGATIVE_REGULATION_OF_FGFR3_SIGNALING		20	0.585376	1.93325	0.00277778	0.00461467	0.286	3558	tags=55%, list=15%, signal=64%
REACTOME_RNA_POLYMERASE_II_TRANSCRIBES_SNRNA_GENES	REACTOME_RNA_POLYMERASE_II_TRANSCRIBES_SNRNA_GENES		76	0.423707	1.93324	0	0.00459051	0.286	4096	tags=37%, list=17%, signal=44%
REACTOME_EUKARYOTIC_TRANSLATION_INITIATION	REACTOME_EUKARYOTIC_TRANSLATION_INITIATION		114	0.392872	1.93184	0	0.0046337	0.289	6352	tags=42%, list=26%, signal=57%
HALLMARK_KRAS_SIGNALING_UP	HALLMARK_KRAS_SIGNALING_UP		161	0.371937	1.93147	0	0.00465036	0.291	4825	tags=34%, list=20%, signal=42%
REACTOME_SIGNALING_BY_TGFB_FAMILY_MEMBERS	REACTOME_SIGNALING_BY_TGFB_FAMILY_MEMBERS		90	0.411552	1.93139	0	0.00463985	0.292	4684	tags=40%, list=19%, signal=49%
REACTOME_INTERLEUKIN_1_SIGNALING	REACTOME_INTERLEUKIN_1_SIGNALING		96	0.403572	1.93059	0	0.00462924	0.293	4119	tags=42%, list=17%, signal=50%
REACTOME_EXTRA_NUCLEAR_ESTROGEN_SIGNALING	REACTOME_EXTRA_NUCLEAR_ESTROGEN_SIGNALING		62	0.438754	1.92971	0	0.00465807	0.295	4642	tags=39%, list=19%, signal=48%
REACTOME_RUNX1_INTERACTS_WITH_CO_FACTORS_WHOSE_PRECISE_EFFECT_ON_RUNX1_TARGETS_IS_NOT_KNOWN	REACTOME_RUNX1_INTERACTS_WITH_CO_FACTORS_WHOSE_PRECISE_EFFECT_ON_RUNX1_TARGETS_IS_NOT_KNOWN		34	0.508954	1.92792	0	0.0047016	0.298	2431	tags=29%, list=10%, signal=33%
REACTOME_SIGNALING_BY_NOTCH4	REACTOME_SIGNALING_BY_NOTCH4		80	0.418507	1.92773	0	0.00469005	0.299	3608	tags=39%, list=15%, signal=45%
REACTOME_TRANSCRIPTIONAL_REGULATION_BY_MECP2	REACTOME_TRANSCRIPTIONAL_REGULATION_BY_MECP2		52	0.46486	1.92632	0	0.00473065	0.303	2531	tags=27%, list=11%, signal=30%
KEGG_ABC_TRANSPORTERS	KEGG_ABC_TRANSPORTERS		38	0.482964	1.92574	0.00308642	0.00473257	0.305	4103	tags=37%, list=17%, signal=44%
REACTOME_REGULATION_OF_IFNA_SIGNALING	REACTOME_REGULATION_OF_IFNA_SIGNALING		15	0.621166	1.92551	0.00265252	0.0047225	0.306	6673	tags=67%, list=28%, signal=92%
KEGG_EPITHELIAL_CELL_SIGNALING_IN_HELICOBACTER_PYLORI_INFECTION	KEGG_EPITHELIAL_CELL_SIGNALING_IN_HELICOBACTER_PYLORI_INFECTION		59	0.444234	1.92498	0	0.00469912	0.306	1964	tags=27%, list=8%, signal=29%
REACTOME_G1_S_DNA_DAMAGE_CHECKPOINTS	REACTOME_G1_S_DNA_DAMAGE_CHECKPOINTS		65	0.427566	1.92469	0	0.00468901	0.307	4001	tags=42%, list=17%, signal=50%
REACTOME_SIGNALING_BY_FGFR2	REACTOME_SIGNALING_BY_FGFR2		58	0.429737	1.92381	0	0.00471699	0.311	3738	tags=40%, list=16%, signal=47%
REACTOME_PTEN_REGULATION	REACTOME_PTEN_REGULATION		128	0.384448	1.92025	0	0.00482336	0.317	3608	tags=34%, list=15%, signal=40%
REACTOME_CLASS_I_MHC_MEDIATED_ANTIGEN_PROCESSING_PRESENTATION	REACTOME_CLASS_I_MHC_MEDIATED_ANTIGEN_PROCESSING_PRESENTATION		337	0.339954	1.91964	0	0.00481246	0.317	3608	tags=30%, list=15%, signal=35%
REACTOME_DEADENYLATION_DEPENDENT_MRNA_DECAY	REACTOME_DEADENYLATION_DEPENDENT_MRNA_DECAY		51	0.457286	1.91739	0.00298507	0.00487986	0.323	6180	tags=59%, list=26%, signal=79%
REACTOME_RESPONSE_TO_ELEVATED_PLATELET_CYTOSOLIC_CA2	REACTOME_RESPONSE_TO_ELEVATED_PLATELET_CYTOSOLIC_CA2		109	0.390057	1.91696	0	0.00486834	0.323	4367	tags=35%, list=18%, signal=42%
REACTOME_GLYCOLYSIS	REACTOME_GLYCOLYSIS		63	0.436679	1.91607	0	0.00485654	0.324	3024	tags=32%, list=13%, signal=36%
HALLMARK_INTERFERON_GAMMA_RESPONSE	HALLMARK_INTERFERON_GAMMA_RESPONSE		185	0.356202	1.91558	0	0.00485788	0.325	4468	tags=29%, list=19%, signal=36%
REACTOME_SIGNALING_BY_NOTCH	REACTOME_SIGNALING_BY_NOTCH		166	0.369192	1.9152	0	0.00483485	0.325	4825	tags=37%, list=20%, signal=46%
KEGG_LONG_TERM_DEPRESSION	KEGG_LONG_TERM_DEPRESSION		51	0.448912	1.91443	0	0.0048844	0.329	3882	tags=35%, list=16%, signal=42%
REACTOME_MET_PROMOTES_CELL_MOTILITY	REACTOME_MET_PROMOTES_CELL_MOTILITY		40	0.481833	1.91416	0	0.00487327	0.33	3680	tags=35%, list=15%, signal=41%
REACTOME_CLEC7A_DECTIN_1_SIGNALING	REACTOME_CLEC7A_DECTIN_1_SIGNALING		95	0.392752	1.91281	0	0.0049223	0.332	3784	tags=35%, list=16%, signal=41%
REACTOME_RHOC_GTPASE_CYCLE	REACTOME_RHOC_GTPASE_CYCLE		71	0.430681	1.91074	0	0.0049973	0.338	2162	tags=24%, list=9%, signal=26%
REACTOME_NUCLEAR_ENVELOPE_BREAKDOWN	REACTOME_NUCLEAR_ENVELOPE_BREAKDOWN		52	0.454692	1.90958	0	0.00504469	0.343	2959	tags=37%, list=12%, signal=42%
REACTOME_SLC_TRANSPORTER_DISORDERS	REACTOME_SLC_TRANSPORTER_DISORDERS		77	0.4198	1.90853	0	0.00508131	0.347	6208	tags=51%, list=26%, signal=68%
REACTOME_TP53_REGULATES_TRANSCRIPTION_OF_CELL_CYCLE_GENES	REACTOME_TP53_REGULATES_TRANSCRIPTION_OF_CELL_CYCLE_GENES		46	0.458573	1.90576	0	0.00518889	0.355	3734	tags=41%, list=15%, signal=49%
REACTOME_SYNTHESIS_OF_PIPS_AT_THE_GOLGI_MEMBRANE	REACTOME_SYNTHESIS_OF_PIPS_AT_THE_GOLGI_MEMBRANE		17	0.591766	1.90548	0.00478469	0.00517825	0.356	6644	tags=76%, list=28%, signal=106%
REACTOME_TIE2_SIGNALING	REACTOME_TIE2_SIGNALING		16	0.612426	1.90238	0.0070922	0.00534494	0.368	1925	tags=38%, list=8%, signal=41%
REACTOME_SIGNALING_BY_ROBO_RECEPTORS	REACTOME_SIGNALING_BY_ROBO_RECEPTORS		199	0.35767	1.90162	0	0.00534386	0.37	4823	tags=33%, list=20%, signal=41%
HALLMARK_OXIDATIVE_PHOSPHORYLATION	HALLMARK_OXIDATIVE_PHOSPHORYLATION		176	0.359554	1.89948	0	0.00551708	0.383	3960	tags=35%, list=16%, signal=41%
REACTOME_RHO_GTPASES_ACTIVATE_NADPH_OXIDASES	REACTOME_RHO_GTPASES_ACTIVATE_NADPH_OXIDASES		20	0.565412	1.89872	0.00240385	0.00551589	0.384	4774	tags=60%, list=20%, signal=75%
REACTOME_PI3K_EVENTS_IN_ERBB2_SIGNALING	REACTOME_PI3K_EVENTS_IN_ERBB2_SIGNALING		15	0.621348	1.89747	0.00242131	0.00558548	0.386	5221	tags=67%, list=22%, signal=85%
REACTOME_DEREGULATED_CDK5_TRIGGERS_MULTIPLE_NEURODEGENERATIVE_PATHWAYS_IN_ALZHEIMER_S_DISEASE_MODELS	REACTOME_DEREGULATED_CDK5_TRIGGERS_MULTIPLE_NEURODEGENERATIVE_PATHWAYS_IN_ALZHEIMER_S_DISEASE_MODELS		19	0.574448	1.89687	0	0.00559565	0.389	4372	tags=58%, list=18%, signal=71%
REACTOME_SIGNALING_BY_SCF_KIT	REACTOME_SIGNALING_BY_SCF_KIT		41	0.465799	1.89657	0.00258398	0.0055817	0.389	2272	tags=27%, list=9%, signal=30%
REACTOME_RORA_ACTIVATES_GENE_EXPRESSION	REACTOME_RORA_ACTIVATES_GENE_EXPRESSION		18	0.57847	1.89575	0.00490196	0.00559122	0.391	2322	tags=44%, list=10%, signal=49%
REACTOME_POTENTIAL_THERAPEUTICS_FOR_SARS	REACTOME_POTENTIAL_THERAPEUTICS_FOR_SARS		75	0.410161	1.8953	0.0031348	0.00559032	0.392	3633	tags=32%, list=15%, signal=38%
REACTOME_RHOB_GTPASE_CYCLE	REACTOME_RHOB_GTPASE_CYCLE		65	0.423084	1.89509	0	0.00557717	0.393	2162	tags=23%, list=9%, signal=25%
REACTOME_TGF_BETA_RECEPTOR_SIGNALING_IN_EMT_EPITHELIAL_TO_MESENCHYMAL_TRANSITION	REACTOME_TGF_BETA_RECEPTOR_SIGNALING_IN_EMT_EPITHELIAL_TO_MESENCHYMAL_TRANSITION		16	0.602774	1.89383	0.0026738	0.00564352	0.398	3649	tags=50%, list=15%, signal=59%
REACTOME_INFLAMMASOMES	REACTOME_INFLAMMASOMES		21	0.561455	1.89336	0.00249377	0.0056417	0.399	4678	tags=57%, list=19%, signal=71%
REACTOME_CELL_CELL_COMMUNICATION	REACTOME_CELL_CELL_COMMUNICATION		103	0.377872	1.89328	0	0.00561738	0.399	4089	tags=27%, list=17%, signal=33%
REACTOME_TCF_DEPENDENT_SIGNALING_IN_RESPONSE_TO_WNT	REACTOME_TCF_DEPENDENT_SIGNALING_IN_RESPONSE_TO_WNT		145	0.37098	1.89312	0	0.00561597	0.4	3693	tags=34%, list=15%, signal=40%
KEGG_WNT_SIGNALING_PATHWAY	KEGG_WNT_SIGNALING_PATHWAY		113	0.376272	1.89309	0	0.00559197	0.4	2868	tags=26%, list=12%, signal=29%
REACTOME_RUNX1_REGULATES_TRANSCRIPTION_OF_GENES_INVOLVED_IN_DIFFERENTIATION_OF_HSCS	REACTOME_RUNX1_REGULATES_TRANSCRIPTION_OF_GENES_INVOLVED_IN_DIFFERENTIATION_OF_HSCS		67	0.430113	1.88944	0	0.00567996	0.404	3608	tags=40%, list=15%, signal=47%
REACTOME_DEGRADATION_OF_BETA_CATENIN_BY_THE_DESTRUCTION_COMPLEX	REACTOME_DEGRADATION_OF_BETA_CATENIN_BY_THE_DESTRUCTION_COMPLEX		80	0.406104	1.88878	0	0.005724	0.409	3608	tags=39%, list=15%, signal=45%
REACTOME_CELLULAR_RESPONSE_TO_STARVATION	REACTOME_CELLULAR_RESPONSE_TO_STARVATION		142	0.368911	1.88824	0	0.00572185	0.41	6352	tags=45%, list=26%, signal=61%
REACTOME_TRANSCRIPTIONAL_REGULATION_OF_WHITE_ADIPOCYTE_DIFFERENTIATION	REACTOME_TRANSCRIPTIONAL_REGULATION_OF_WHITE_ADIPOCYTE_DIFFERENTIATION		78	0.410314	1.88745	0	0.00573101	0.412	3181	tags=31%, list=13%, signal=35%
REACTOME_SIGNALING_BY_TYPE_1_INSULIN_LIKE_GROWTH_FACTOR_1_RECEPTOR_IGF1R	REACTOME_SIGNALING_BY_TYPE_1_INSULIN_LIKE_GROWTH_FACTOR_1_RECEPTOR_IGF1R		36	0.477901	1.88621	0	0.00577385	0.415	3570	tags=42%, list=15%, signal=49%
REACTOME_TRANSCRIPTIONAL_REGULATION_OF_GRANULOPOIESIS	REACTOME_TRANSCRIPTIONAL_REGULATION_OF_GRANULOPOIESIS		27	0.519526	1.88287	0	0.00591501	0.423	3703	tags=41%, list=15%, signal=48%
REACTOME_ACTIVATED_TAK1_MEDIATES_P38_MAPK_ACTIVATION	REACTOME_ACTIVATED_TAK1_MEDIATES_P38_MAPK_ACTIVATION		22	0.548507	1.88171	0	0.00594532	0.424	3784	tags=50%, list=16%, signal=59%
REACTOME_NGF_STIMULATED_TRANSCRIPTION	REACTOME_NGF_STIMULATED_TRANSCRIPTION		32	0.502455	1.8812	0.00536193	0.00595229	0.425	5287	tags=59%, list=22%, signal=76%
HALLMARK_G2M_CHECKPOINT	HALLMARK_G2M_CHECKPOINT		182	0.357358	1.88104	0	0.0059278	0.425	3743	tags=29%, list=16%, signal=34%
KEGG_ERBB_SIGNALING_PATHWAY	KEGG_ERBB_SIGNALING_PATHWAY		79	0.407043	1.8799	0	0.00600057	0.429	2588	tags=28%, list=11%, signal=31%
REACTOME_OXIDATIVE_STRESS_INDUCED_SENESCENCE	REACTOME_OXIDATIVE_STRESS_INDUCED_SENESCENCE		60	0.426272	1.87966	0	0.00598658	0.429	4063	tags=35%, list=17%, signal=42%
REACTOME_B_WICH_COMPLEX_POSITIVELY_REGULATES_RRNA_EXPRESSION	REACTOME_B_WICH_COMPLEX_POSITIVELY_REGULATES_RRNA_EXPRESSION		28	0.498382	1.87802	0	0.0060589	0.436	1211	tags=29%, list=5%, signal=30%
REACTOME_MITOTIC_PROPHASE	REACTOME_MITOTIC_PROPHASE		80	0.405599	1.87772	0	0.00606569	0.438	3783	tags=36%, list=16%, signal=43%
KEGG_AUTOIMMUNE_THYROID_DISEASE	KEGG_AUTOIMMUNE_THYROID_DISEASE		34	0.486471	1.8749	0.00271739	0.00620938	0.449	4052	tags=41%, list=17%, signal=49%
REACTOME_ATTENUATION_PHASE	REACTOME_ATTENUATION_PHASE		23	0.538158	1.8745	0	0.00621551	0.45	5866	tags=65%, list=24%, signal=86%
REACTOME_NUCLEOTIDE_BINDING_DOMAIN_LEUCINE_RICH_REPEAT_CONTAINING_RECEPTOR_NLR_SIGNALING_PATHWAYS	REACTOME_NUCLEOTIDE_BINDING_DOMAIN_LEUCINE_RICH_REPEAT_CONTAINING_RECEPTOR_NLR_SIGNALING_PATHWAYS		55	0.441269	1.87389	0	0.00622143	0.451	4684	tags=47%, list=19%, signal=59%
REACTOME_DEFECTIVE_CFTR_CAUSES_CYSTIC_FIBROSIS	REACTOME_DEFECTIVE_CFTR_CAUSES_CYSTIC_FIBROSIS		58	0.438058	1.87022	0.0057971	0.00645707	0.467	4098	tags=45%, list=17%, signal=54%
REACTOME_FACTORS_INVOLVED_IN_MEGAKARYOCYTE_DEVELOPMENT_AND_PLATELET_PRODUCTION	REACTOME_FACTORS_INVOLVED_IN_MEGAKARYOCYTE_DEVELOPMENT_AND_PLATELET_PRODUCTION		126	0.376951	1.86952	0	0.00649265	0.473	5209	tags=42%, list=22%, signal=53%
REACTOME_INTERLEUKIN_7_SIGNALING	REACTOME_INTERLEUKIN_7_SIGNALING		21	0.54961	1.86797	0.0027248	0.00652614	0.475	3592	tags=33%, list=15%, signal=39%
REACTOME_FC_EPSILON_RECEPTOR_FCERI_SIGNALING	REACTOME_FC_EPSILON_RECEPTOR_FCERI_SIGNALING		177	0.35584	1.86717	0	0.00654101	0.478	3608	tags=27%, list=15%, signal=31%
REACTOME_PLATELET_ACTIVATION_SIGNALING_AND_AGGREGATION	REACTOME_PLATELET_ACTIVATION_SIGNALING_AND_AGGREGATION		216	0.341039	1.86512	0	0.0066565	0.484	4420	tags=30%, list=18%, signal=37%
REACTOME_RHOG_GTPASE_CYCLE	REACTOME_RHOG_GTPASE_CYCLE		70	0.410978	1.86497	0	0.00663049	0.484	4415	tags=40%, list=18%, signal=49%
REACTOME_HEDGEHOG_LIGAND_BIOGENESIS	REACTOME_HEDGEHOG_LIGAND_BIOGENESIS		59	0.439321	1.85999	0	0.0069866	0.5	3608	tags=41%, list=15%, signal=48%
REACTOME_SIGNALING_BY_FGFR_IN_DISEASE	REACTOME_SIGNALING_BY_FGFR_IN_DISEASE		50	0.443192	1.85919	0	0.00709387	0.508	3439	tags=38%, list=14%, signal=44%
REACTOME_SIGNALING_BY_HEDGEHOG	REACTOME_SIGNALING_BY_HEDGEHOG		136	0.366235	1.85793	0	0.00713533	0.51	3720	tags=32%, list=15%, signal=38%
REACTOME_RHOA_GTPASE_CYCLE	REACTOME_RHOA_GTPASE_CYCLE		143	0.359864	1.85757	0	0.00710788	0.51	2561	tags=22%, list=11%, signal=25%
REACTOME_SIGNALING_BY_WNT	REACTOME_SIGNALING_BY_WNT		226	0.34124	1.85674	0	0.00712116	0.513	3693	tags=30%, list=15%, signal=35%
REACTOME_ACTIVATION_OF_THE_MRNA_UPON_BINDING_OF_THE_CAP_BINDING_COMPLEX_AND_EIFS_AND_SUBSEQUENT_BINDING_TO_43S	REACTOME_ACTIVATION_OF_THE_MRNA_UPON_BINDING_OF_THE_CAP_BINDING_COMPLEX_AND_EIFS_AND_SUBSEQUENT_BINDING_TO_43S		58	0.434318	1.85635	0	0.00711291	0.513	4759	tags=33%, list=20%, signal=41%
KEGG_TYPE_I_DIABETES_MELLITUS	KEGG_TYPE_I_DIABETES_MELLITUS		30	0.488343	1.85559	0.00763359	0.00712495	0.513	1992	tags=30%, list=8%, signal=33%
REACTOME_SYNTHESIS_OF_ACTIVE_UBIQUITIN_ROLES_OF_E1_AND_E2_ENZYMES	REACTOME_SYNTHESIS_OF_ACTIVE_UBIQUITIN_ROLES_OF_E1_AND_E2_ENZYMES		28	0.504131	1.85338	0	0.00728311	0.526	5093	tags=46%, list=21%, signal=59%
REACTOME_M_PHASE	REACTOME_M_PHASE		329	0.320909	1.85259	0	0.00729484	0.529	3783	tags=30%, list=16%, signal=35%
REACTOME_REGULATION_OF_MRNA_STABILITY_BY_PROTEINS_THAT_BIND_AU_RICH_ELEMENTS	REACTOME_REGULATION_OF_MRNA_STABILITY_BY_PROTEINS_THAT_BIND_AU_RICH_ELEMENTS		84	0.397949	1.85169	0.003367	0.00731686	0.533	4019	tags=42%, list=17%, signal=50%
REACTOME_TOLL_LIKE_RECEPTOR_9_TLR9_CASCADE	REACTOME_TOLL_LIKE_RECEPTOR_9_TLR9_CASCADE		87	0.388645	1.84688	0	0.00759169	0.546	3946	tags=37%, list=16%, signal=44%
REACTOME_UB_SPECIFIC_PROCESSING_PROTEASES	REACTOME_UB_SPECIFIC_PROCESSING_PROTEASES		153	0.357387	1.84518	0	0.00771658	0.556	4328	tags=37%, list=18%, signal=44%
REACTOME_TRANSPORT_OF_MATURE_TRANSCRIPT_TO_CYTOPLASM	REACTOME_TRANSPORT_OF_MATURE_TRANSCRIPT_TO_CYTOPLASM		82	0.392494	1.84412	0	0.00780198	0.562	5469	tags=48%, list=23%, signal=61%
REACTOME_RAC1_GTPASE_CYCLE	REACTOME_RAC1_GTPASE_CYCLE		173	0.346678	1.84383	0	0.0077827	0.562	2162	tags=21%, list=9%, signal=23%
REACTOME_TOLL_LIKE_RECEPTOR_CASCADES	REACTOME_TOLL_LIKE_RECEPTOR_CASCADES		138	0.363285	1.8431	0	0.00783175	0.566	3946	tags=33%, list=16%, signal=39%
REACTOME_DOWNSTREAM_SIGNALING_EVENTS_OF_B_CELL_RECEPTOR_BCR	REACTOME_DOWNSTREAM_SIGNALING_EVENTS_OF_B_CELL_RECEPTOR_BCR		77	0.401873	1.84263	0	0.00784261	0.566	3608	tags=36%, list=15%, signal=43%
REACTOME_SUMOYLATION_OF_CHROMATIN_ORGANIZATION_PROTEINS	REACTOME_SUMOYLATION_OF_CHROMATIN_ORGANIZATION_PROTEINS		56	0.424654	1.84132	0	0.00788239	0.571	6192	tags=50%, list=26%, signal=67%
REACTOME_NEGATIVE_REGULATION_OF_FGFR1_SIGNALING	REACTOME_NEGATIVE_REGULATION_OF_FGFR1_SIGNALING		21	0.535459	1.84066	0.00791557	0.0079295	0.574	3558	tags=48%, list=15%, signal=56%
REACTOME_INTERLEUKIN_1_FAMILY_SIGNALING	REACTOME_INTERLEUKIN_1_FAMILY_SIGNALING		126	0.363789	1.83942	0	0.00798595	0.578	4119	tags=37%, list=17%, signal=44%
REACTOME_HEDGEHOG_OFF_STATE	REACTOME_HEDGEHOG_OFF_STATE		105	0.368066	1.8385	0	0.00806018	0.582	3720	tags=34%, list=15%, signal=40%
REACTOME_GLUCONEOGENESIS	REACTOME_GLUCONEOGENESIS		27	0.515178	1.83689	0	0.00813787	0.588	3904	tags=41%, list=16%, signal=49%
REACTOME_SUMOYLATION_OF_UBIQUITINYLATION_PROTEINS	REACTOME_SUMOYLATION_OF_UBIQUITINYLATION_PROTEINS		38	0.463419	1.83276	0	0.00841272	0.6	3709	tags=39%, list=15%, signal=47%
REACTOME_PHOSPHOLIPID_METABOLISM	REACTOME_PHOSPHOLIPID_METABOLISM		183	0.344784	1.82913	0	0.00866326	0.606	3951	tags=27%, list=16%, signal=32%
REACTOME_REGULATION_OF_SIGNALING_BY_CBL	REACTOME_REGULATION_OF_SIGNALING_BY_CBL		22	0.536554	1.82893	0.00524934	0.00864194	0.607	1925	tags=32%, list=8%, signal=35%
REACTOME_MRNA_SPLICING	REACTOME_MRNA_SPLICING		176	0.34469	1.82821	0	0.00863991	0.608	3990	tags=34%, list=17%, signal=40%
REACTOME_DAP12_SIGNALING	REACTOME_DAP12_SIGNALING		28	0.504985	1.82798	0.00542005	0.00863738	0.609	1992	tags=29%, list=8%, signal=31%
REACTOME_REGULATION_OF_PTEN_STABILITY_AND_ACTIVITY	REACTOME_REGULATION_OF_PTEN_STABILITY_AND_ACTIVITY		64	0.421774	1.82747	0	0.00865071	0.612	3608	tags=39%, list=15%, signal=46%
REACTOME_GOLGI_ASSOCIATED_VESICLE_BIOGENESIS	REACTOME_GOLGI_ASSOCIATED_VESICLE_BIOGENESIS		53	0.427526	1.82623	0	0.00863849	0.613	5633	tags=55%, list=23%, signal=71%
KEGG_P53_SIGNALING_PATHWAY	KEGG_P53_SIGNALING_PATHWAY		60	0.41793	1.8254	0	0.0086716	0.617	3765	tags=35%, list=16%, signal=41%
KEGG_GLYCOSAMINOGLYCAN_DEGRADATION	KEGG_GLYCOSAMINOGLYCAN_DEGRADATION		20	0.544304	1.82429	0.0131579	0.00869639	0.619	4686	tags=50%, list=19%, signal=62%
REACTOME_THE_ROLE_OF_GTSE1_IN_G2_M_PROGRESSION_AFTER_G2_CHECKPOINT	REACTOME_THE_ROLE_OF_GTSE1_IN_G2_M_PROGRESSION_AFTER_G2_CHECKPOINT		67	0.41445	1.82326	0	0.00873842	0.621	3608	tags=37%, list=15%, signal=44%
HALLMARK_ESTROGEN_RESPONSE_LATE	HALLMARK_ESTROGEN_RESPONSE_LATE		164	0.350116	1.82293	0	0.00874415	0.623	4328	tags=30%, list=18%, signal=36%
REACTOME_GAMMA_CARBOXYLATION_HYPUSINE_FORMATION_AND_ARYLSULFATASE_ACTIVATION	REACTOME_GAMMA_CARBOXYLATION_HYPUSINE_FORMATION_AND_ARYLSULFATASE_ACTIVATION		32	0.481779	1.8214	0.00277008	0.0088474	0.626	4917	tags=44%, list=20%, signal=55%
REACTOME_DEATH_RECEPTOR_SIGNALLING	REACTOME_DEATH_RECEPTOR_SIGNALLING		132	0.365382	1.82134	0	0.00881689	0.626	5403	tags=41%, list=22%, signal=52%
REACTOME_SARS_COV_2_INFECTION	REACTOME_SARS_COV_2_INFECTION		62	0.412321	1.82092	0.00297619	0.00880415	0.628	4788	tags=40%, list=20%, signal=50%
REACTOME_HDACS_DEACETYLATE_HISTONES	REACTOME_HDACS_DEACETYLATE_HISTONES		32	0.482584	1.82005	0.00266667	0.00884648	0.632	1609	tags=28%, list=7%, signal=30%
REACTOME_HCMV_EARLY_EVENTS	REACTOME_HCMV_EARLY_EVENTS		66	0.413828	1.81967	0	0.0088517	0.633	3013	tags=29%, list=13%, signal=33%
KEGG_MAPK_SIGNALING_PATHWAY	KEGG_MAPK_SIGNALING_PATHWAY		218	0.332993	1.81604	0	0.00914923	0.645	3946	tags=28%, list=16%, signal=33%
REACTOME_BLOOD_GROUP_SYSTEMS_BIOSYNTHESIS	REACTOME_BLOOD_GROUP_SYSTEMS_BIOSYNTHESIS		15	0.596692	1.81599	0.00497512	0.00911822	0.645	5454	tags=60%, list=23%, signal=78%
REACTOME_SIGNALING_BY_NOTCH1	REACTOME_SIGNALING_BY_NOTCH1		68	0.410572	1.81545	0	0.00913202	0.647	4825	tags=41%, list=20%, signal=51%
REACTOME_TCR_SIGNALING	REACTOME_TCR_SIGNALING		116	0.36866	1.8148	0	0.00916223	0.65	3784	tags=33%, list=16%, signal=39%
REACTOME_MYD88_INDEPENDENT_TLR4_CASCADE	REACTOME_MYD88_INDEPENDENT_TLR4_CASCADE		90	0.380293	1.81468	0	0.00913149	0.65	3946	tags=36%, list=16%, signal=42%
KEGG_CITRATE_CYCLE_TCA_CYCLE	KEGG_CITRATE_CYCLE_TCA_CYCLE		29	0.499628	1.81287	0.00263158	0.00932935	0.657	3310	tags=45%, list=14%, signal=52%
REACTOME_CYCLIN_A_CDK2_ASSOCIATED_EVENTS_AT_S_PHASE_ENTRY	REACTOME_CYCLIN_A_CDK2_ASSOCIATED_EVENTS_AT_S_PHASE_ENTRY		83	0.381545	1.80994	0	0.00947375	0.664	3734	tags=36%, list=15%, signal=43%
REACTOME_VIRAL_MESSENGER_RNA_SYNTHESIS	REACTOME_VIRAL_MESSENGER_RNA_SYNTHESIS		43	0.452126	1.80977	0.00574713	0.00946873	0.665	6192	tags=60%, list=26%, signal=81%
REACTOME_PI3K_AKT_SIGNALING_IN_CANCER	REACTOME_PI3K_AKT_SIGNALING_IN_CANCER		88	0.386749	1.8091	0	0.00950683	0.668	4774	tags=40%, list=20%, signal=49%
KEGG_OOCYTE_MEIOSIS	KEGG_OOCYTE_MEIOSIS		99	0.371766	1.80703	0	0.00963829	0.674	3862	tags=33%, list=16%, signal=40%
REACTOME_NEGATIVE_REGULATION_OF_FGFR2_SIGNALING	REACTOME_NEGATIVE_REGULATION_OF_FGFR2_SIGNALING		22	0.52855	1.8065	0.00546448	0.00964998	0.675	3558	tags=45%, list=15%, signal=53%
REACTOME_DOWNSTREAM_SIGNAL_TRANSDUCTION	REACTOME_DOWNSTREAM_SIGNAL_TRANSDUCTION		28	0.498087	1.80556	0	0.00965958	0.676	2272	tags=29%, list=9%, signal=32%
KEGG_ALLOGRAFT_REJECTION	KEGG_ALLOGRAFT_REJECTION		26	0.496714	1.80475	0	0.00968815	0.677	2142	tags=31%, list=9%, signal=34%
REACTOME_TRANSCRIPTIONAL_REGULATION_BY_SMALL_RNAS	REACTOME_TRANSCRIPTIONAL_REGULATION_BY_SMALL_RNAS		46	0.440744	1.80373	0.00542005	0.00977339	0.682	6626	tags=65%, list=27%, signal=90%
REACTOME_SCF_SKP2_MEDIATED_DEGRADATION_OF_P27_P21	REACTOME_SCF_SKP2_MEDIATED_DEGRADATION_OF_P27_P21		59	0.419929	1.80342	0.0030303	0.00977664	0.683	4001	tags=42%, list=17%, signal=51%
REACTOME_PROGRAMMED_CELL_DEATH	REACTOME_PROGRAMMED_CELL_DEATH		184	0.339999	1.80058	0	0.0100795	0.701	4001	tags=32%, list=17%, signal=38%
KEGG_CHRONIC_MYELOID_LEUKEMIA	KEGG_CHRONIC_MYELOID_LEUKEMIA		68	0.406282	1.79902	0	0.0101312	0.706	3205	tags=31%, list=13%, signal=36%
REACTOME_UCH_PROTEINASES	REACTOME_UCH_PROTEINASES		82	0.391436	1.79858	0	0.0101242	0.706	4001	tags=40%, list=17%, signal=48%
REACTOME_REGULATION_OF_GLUCOKINASE_BY_GLUCOKINASE_REGULATORY_PROTEIN	REACTOME_REGULATION_OF_GLUCOKINASE_BY_GLUCOKINASE_REGULATORY_PROTEIN		29	0.491716	1.79324	0.00546448	0.0105457	0.723	6626	tags=69%, list=27%, signal=95%
REACTOME_DEADENYLATION_OF_MRNA	REACTOME_DEADENYLATION_OF_MRNA		22	0.519264	1.79192	0.0026738	0.0106539	0.728	5842	tags=64%, list=24%, signal=84%
REACTOME_MET_ACTIVATES_PTK2_SIGNALING	REACTOME_MET_ACTIVATES_PTK2_SIGNALING		29	0.48116	1.79183	0.008	0.0106285	0.728	3680	tags=34%, list=15%, signal=41%
REACTOME_DEFECTIVE_C1GALT1C1_CAUSES_TN_POLYAGGLUTINATION_SYNDROME_TNPS	REACTOME_DEFECTIVE_C1GALT1C1_CAUSES_TN_POLYAGGLUTINATION_SYNDROME_TNPS		15	0.586534	1.78939	0.00493827	0.0107828	0.735	5569	tags=53%, list=23%, signal=69%
REACTOME_HCMV_INFECTION	REACTOME_HCMV_INFECTION		87	0.380322	1.78935	0	0.0107487	0.735	4581	tags=37%, list=19%, signal=45%
HALLMARK_APICAL_JUNCTION	HALLMARK_APICAL_JUNCTION		172	0.340371	1.78814	0	0.0108076	0.737	4467	tags=28%, list=19%, signal=35%
REACTOME_IRS_MEDIATED_SIGNALLING	REACTOME_IRS_MEDIATED_SIGNALLING		32	0.465834	1.78757	0	0.0108296	0.738	4636	tags=47%, list=19%, signal=58%
REACTOME_CYCLIN_A_B1_B2_ASSOCIATED_EVENTS_DURING_G2_M_TRANSITION	REACTOME_CYCLIN_A_B1_B2_ASSOCIATED_EVENTS_DURING_G2_M_TRANSITION		25	0.515641	1.78657	0	0.0109344	0.744	2886	tags=36%, list=12%, signal=41%
REACTOME_NEGATIVE_REGULATION_OF_MAPK_PATHWAY	REACTOME_NEGATIVE_REGULATION_OF_MAPK_PATHWAY		39	0.440546	1.78204	0	0.0114269	0.756	3934	tags=44%, list=16%, signal=52%
REACTOME_SIGNALING_BY_INSULIN_RECEPTOR	REACTOME_SIGNALING_BY_INSULIN_RECEPTOR		57	0.417224	1.77969	0.00298507	0.0116676	0.763	3570	tags=37%, list=15%, signal=43%
REACTOME_MITOTIC_G2_G2_M_PHASES	REACTOME_MITOTIC_G2_G2_M_PHASES		184	0.336662	1.77969	0	0.0116313	0.763	4730	tags=36%, list=20%, signal=44%
REACTOME_NUCLEAR_SIGNALING_BY_ERBB4	REACTOME_NUCLEAR_SIGNALING_BY_ERBB4		30	0.480034	1.77948	0.00806452	0.0116185	0.764	5293	tags=47%, list=22%, signal=60%
REACTOME_RAC2_GTPASE_CYCLE	REACTOME_RAC2_GTPASE_CYCLE		83	0.384342	1.77841	0	0.0116781	0.768	4585	tags=39%, list=19%, signal=47%
REACTOME_FCERI_MEDIATED_NF_KB_ACTIVATION	REACTOME_FCERI_MEDIATED_NF_KB_ACTIVATION		130	0.352881	1.77665	0	0.0117677	0.771	3784	tags=26%, list=16%, signal=31%
REACTOME_MHC_CLASS_II_ANTIGEN_PRESENTATION	REACTOME_MHC_CLASS_II_ANTIGEN_PRESENTATION		104	0.371978	1.77618	0	0.0117809	0.772	2860	tags=26%, list=12%, signal=29%
REACTOME_SIGNALING_BY_NOTCH1_PEST_DOMAIN_MUTANTS_IN_CANCER	REACTOME_SIGNALING_BY_NOTCH1_PEST_DOMAIN_MUTANTS_IN_CANCER		54	0.414292	1.77511	0.00273973	0.0118568	0.778	4825	tags=37%, list=20%, signal=46%
KEGG_TGF_BETA_SIGNALING_PATHWAY	KEGG_TGF_BETA_SIGNALING_PATHWAY		70	0.395937	1.77438	0	0.01186	0.781	4757	tags=40%, list=20%, signal=50%
KEGG_GLIOMA	KEGG_GLIOMA		59	0.40305	1.7743	0.00282486	0.0118326	0.782	3882	tags=31%, list=16%, signal=36%
REACTOME_EPIGENETIC_REGULATION_OF_GENE_EXPRESSION	REACTOME_EPIGENETIC_REGULATION_OF_GENE_EXPRESSION		82	0.3832	1.77352	0	0.0118991	0.783	3221	tags=34%, list=13%, signal=39%
REACTOME_SIGNALING_BY_THE_B_CELL_RECEPTOR_BCR	REACTOME_SIGNALING_BY_THE_B_CELL_RECEPTOR_BCR		159	0.347171	1.77257	0	0.0119821	0.787	3608	tags=26%, list=15%, signal=30%
KEGG_GRAFT_VERSUS_HOST_DISEASE	KEGG_GRAFT_VERSUS_HOST_DISEASE		29	0.489477	1.7708	0	0.0121975	0.792	1992	tags=28%, list=8%, signal=30%
REACTOME_INTERACTIONS_OF_VPR_WITH_HOST_CELLULAR_PROTEINS	REACTOME_INTERACTIONS_OF_VPR_WITH_HOST_CELLULAR_PROTEINS		36	0.449977	1.76783	0.00253165	0.0125332	0.799	6626	tags=64%, list=27%, signal=88%
REACTOME_TRANSCRIPTIONAL_REGULATION_BY_RUNX2	REACTOME_TRANSCRIPTIONAL_REGULATION_BY_RUNX2		108	0.365069	1.76627	0	0.0126739	0.804	3608	tags=31%, list=15%, signal=37%
REACTOME_GAP_JUNCTION_TRAFFICKING_AND_REGULATION	REACTOME_GAP_JUNCTION_TRAFFICKING_AND_REGULATION		27	0.48777	1.76448	0.00273973	0.0128472	0.807	5920	tags=52%, list=25%, signal=69%
KEGG_TOLL_LIKE_RECEPTOR_SIGNALING_PATHWAY	KEGG_TOLL_LIKE_RECEPTOR_SIGNALING_PATHWAY		81	0.381034	1.76438	0	0.0128248	0.808	4254	tags=38%, list=18%, signal=46%
HALLMARK_GLYCOLYSIS	HALLMARK_GLYCOLYSIS		173	0.341601	1.76406	0	0.0128257	0.81	3514	tags=24%, list=15%, signal=28%
REACTOME_SIGNALING_BY_KIT_IN_DISEASE	REACTOME_SIGNALING_BY_KIT_IN_DISEASE		19	0.534509	1.76299	0.0116279	0.0129527	0.812	2272	tags=32%, list=9%, signal=35%
REACTOME_SIGNALING_BY_FGFR2_IN_DISEASE	REACTOME_SIGNALING_BY_FGFR2_IN_DISEASE		31	0.477022	1.76294	0.00508906	0.012922	0.812	3439	tags=42%, list=14%, signal=49%
REACTOME_STABILIZATION_OF_P53	REACTOME_STABILIZATION_OF_P53		54	0.411313	1.76142	0	0.0130145	0.818	3608	tags=41%, list=15%, signal=48%
KEGG_MTOR_SIGNALING_PATHWAY	KEGG_MTOR_SIGNALING_PATHWAY		46	0.410025	1.75897	0	0.0131651	0.822	4787	tags=43%, list=20%, signal=54%
REACTOME_FCGAMMA_RECEPTOR_FCGR_DEPENDENT_PHAGOCYTOSIS	REACTOME_FCGAMMA_RECEPTOR_FCGR_DEPENDENT_PHAGOCYTOSIS		136	0.343442	1.75882	0	0.0131719	0.822	1925	tags=16%, list=8%, signal=17%
REACTOME_MITOPHAGY	REACTOME_MITOPHAGY		26	0.494427	1.75842	0.0078125	0.0131711	0.822	4684	tags=46%, list=19%, signal=57%
KEGG_VASOPRESSIN_REGULATED_WATER_REABSORPTION	KEGG_VASOPRESSIN_REGULATED_WATER_REABSORPTION		38	0.440505	1.75719	0.00859599	0.0133081	0.826	3641	tags=37%, list=15%, signal=43%
REACTOME_SENESCENCE_ASSOCIATED_SECRETORY_PHENOTYPE_SASP	REACTOME_SENESCENCE_ASSOCIATED_SECRETORY_PHENOTYPE_SASP		48	0.424999	1.75718	0.00282486	0.013277	0.827	3862	tags=38%, list=16%, signal=45%
REACTOME_MAPK_TARGETS_NUCLEAR_EVENTS_MEDIATED_BY_MAP_KINASES	REACTOME_MAPK_TARGETS_NUCLEAR_EVENTS_MEDIATED_BY_MAP_KINASES		29	0.466327	1.75544	0.00828729	0.013448	0.831	3862	tags=41%, list=16%, signal=49%
REACTOME_RHOBTB1_GTPASE_CYCLE	REACTOME_RHOBTB1_GTPASE_CYCLE		22	0.514441	1.75346	0.0154242	0.0136791	0.839	3436	tags=50%, list=14%, signal=58%
REACTOME_EXPORT_OF_VIRAL_RIBONUCLEOPROTEINS_FROM_NUCLEUS	REACTOME_EXPORT_OF_VIRAL_RIBONUCLEOPROTEINS_FROM_NUCLEUS		32	0.467959	1.75171	0.00265252	0.0138645	0.846	6626	tags=66%, list=27%, signal=90%
KEGG_ACUTE_MYELOID_LEUKEMIA	KEGG_ACUTE_MYELOID_LEUKEMIA		54	0.421597	1.75005	0	0.0139959	0.848	3882	tags=31%, list=16%, signal=37%
REACTOME_MITOTIC_METAPHASE_AND_ANAPHASE	REACTOME_MITOTIC_METAPHASE_AND_ANAPHASE		215	0.324958	1.74779	0	0.0142127	0.855	3859	tags=31%, list=16%, signal=37%
REACTOME_CELLULAR_RESPONSE_TO_CHEMICAL_STRESS	REACTOME_CELLULAR_RESPONSE_TO_CHEMICAL_STRESS		150	0.339808	1.74643	0	0.0142615	0.857	4023	tags=35%, list=17%, signal=42%
REACTOME_INITIATION_OF_NUCLEAR_ENVELOPE_NE_REFORMATION	REACTOME_INITIATION_OF_NUCLEAR_ENVELOPE_NE_REFORMATION		19	0.541046	1.74508	0.0124378	0.0143696	0.863	2032	tags=42%, list=8%, signal=46%
REACTOME_DOWNSTREAM_SIGNALING_OF_ACTIVATED_FGFR4	REACTOME_DOWNSTREAM_SIGNALING_OF_ACTIVATED_FGFR4		15	0.558968	1.74341	0.0140515	0.01449	0.863	2936	tags=47%, list=12%, signal=53%
REACTOME_DEGRADATION_OF_DVL	REACTOME_DEGRADATION_OF_DVL		55	0.399685	1.74251	0.00576369	0.0145373	0.864	3608	tags=40%, list=15%, signal=47%
REACTOME_SEPARATION_OF_SISTER_CHROMATIDS	REACTOME_SEPARATION_OF_SISTER_CHROMATIDS		172	0.331073	1.74148	0	0.0146001	0.866	3608	tags=30%, list=15%, signal=35%
REACTOME_MRNA_SPLICING_MINOR_PATHWAY	REACTOME_MRNA_SPLICING_MINOR_PATHWAY		50	0.41173	1.73807	0.00310559	0.0149328	0.873	1582	tags=26%, list=7%, signal=28%
KEGG_GAP_JUNCTION	KEGG_GAP_JUNCTION		69	0.384293	1.73698	0.00338983	0.0150882	0.875	3882	tags=29%, list=16%, signal=34%
REACTOME_CELL_CYCLE_MITOTIC	REACTOME_CELL_CYCLE_MITOTIC		469	0.29451	1.7353	0	0.0152261	0.879	3783	tags=27%, list=16%, signal=32%
KEGG_FOCAL_ADHESION	KEGG_FOCAL_ADHESION		182	0.326773	1.73242	0	0.0155577	0.886	3680	tags=27%, list=15%, signal=32%
REACTOME_HOST_INTERACTIONS_OF_HIV_FACTORS	REACTOME_HOST_INTERACTIONS_OF_HIV_FACTORS		126	0.344994	1.7319	0	0.0155868	0.886	3709	tags=32%, list=15%, signal=37%
HALLMARK_COMPLEMENT	HALLMARK_COMPLEMENT		173	0.329886	1.72911	0	0.0159996	0.892	4722	tags=28%, list=20%, signal=35%
REACTOME_METABOLISM_OF_AMINO_ACIDS_AND_DERIVATIVES	REACTOME_METABOLISM_OF_AMINO_ACIDS_AND_DERIVATIVES		321	0.304188	1.72696	0	0.0162422	0.894	6352	tags=42%, list=26%, signal=56%
REACTOME_DEGRADATION_OF_GLI1_BY_THE_PROTEASOME	REACTOME_DEGRADATION_OF_GLI1_BY_THE_PROTEASOME		57	0.394807	1.72665	0	0.0162336	0.895	3608	tags=40%, list=15%, signal=47%
REACTOME_DARPP_32_EVENTS	REACTOME_DARPP_32_EVENTS		23	0.49979	1.72336	0.00874636	0.0165216	0.899	3394	tags=39%, list=14%, signal=46%
REACTOME_ARACHIDONIC_ACID_METABOLISM	REACTOME_ARACHIDONIC_ACID_METABOLISM		47	0.415753	1.72283	0.00284091	0.0165545	0.9	3188	tags=30%, list=13%, signal=34%
REACTOME_COPI_INDEPENDENT_GOLGI_TO_ER_RETROGRADE_TRAFFIC	REACTOME_COPI_INDEPENDENT_GOLGI_TO_ER_RETROGRADE_TRAFFIC		43	0.431176	1.72122	0.00539084	0.0167588	0.902	2860	tags=33%, list=12%, signal=37%
REACTOME_NOTCH_HLH_TRANSCRIPTION_PATHWAY	REACTOME_NOTCH_HLH_TRANSCRIPTION_PATHWAY		28	0.47052	1.72013	0.00539084	0.0168786	0.902	3047	tags=29%, list=13%, signal=33%
REACTOME_DOWNSTREAM_SIGNALING_OF_ACTIVATED_FGFR3	REACTOME_DOWNSTREAM_SIGNALING_OF_ACTIVATED_FGFR3		16	0.563405	1.71959	0.0103627	0.0169029	0.903	2936	tags=50%, list=12%, signal=57%
REACTOME_FLT3_SIGNALING	REACTOME_FLT3_SIGNALING		37	0.444933	1.71957	0.00543478	0.0168571	0.903	3460	tags=35%, list=14%, signal=41%
KEGG_SMALL_CELL_LUNG_CANCER	KEGG_SMALL_CELL_LUNG_CANCER		80	0.370616	1.71824	0	0.0169867	0.903	5581	tags=43%, list=23%, signal=55%
REACTOME_SIGNALING_BY_WNT_IN_CANCER	REACTOME_SIGNALING_BY_WNT_IN_CANCER		27	0.47339	1.71498	0.00261097	0.017436	0.909	3402	tags=44%, list=14%, signal=52%
KEGG_NEUROTROPHIN_SIGNALING_PATHWAY	KEGG_NEUROTROPHIN_SIGNALING_PATHWAY		112	0.344224	1.71439	0	0.017437	0.909	3882	tags=33%, list=16%, signal=39%
REACTOME_CHROMATIN_MODIFYING_ENZYMES	REACTOME_CHROMATIN_MODIFYING_ENZYMES		189	0.317396	1.71387	0	0.0174895	0.91	3163	tags=27%, list=13%, signal=31%
REACTOME_DEPOLYMERISATION_OF_THE_NUCLEAR_LAMINA	REACTOME_DEPOLYMERISATION_OF_THE_NUCLEAR_LAMINA		15	0.552943	1.7138	0.0177665	0.0174571	0.91	2840	tags=47%, list=12%, signal=53%
REACTOME_MRNA_CAPPING	REACTOME_MRNA_CAPPING		28	0.475669	1.71111	0	0.0177747	0.913	3439	tags=43%, list=14%, signal=50%
HALLMARK_ADIPOGENESIS	HALLMARK_ADIPOGENESIS		173	0.323016	1.7109	0	0.0177414	0.913	3899	tags=28%, list=16%, signal=33%
REACTOME_DOWNREGULATION_OF_ERBB2_SIGNALING	REACTOME_DOWNREGULATION_OF_ERBB2_SIGNALING		27	0.471323	1.70955	0.0180412	0.0179032	0.917	4710	tags=56%, list=20%, signal=69%
REACTOME_CONSTITUTIVE_SIGNALING_BY_ABERRANT_PI3K_IN_CANCER	REACTOME_CONSTITUTIVE_SIGNALING_BY_ABERRANT_PI3K_IN_CANCER		62	0.387044	1.70842	0	0.0180202	0.919	4774	tags=37%, list=20%, signal=46%
REACTOME_DOWNREGULATION_OF_SMAD2_3_SMAD4_TRANSCRIPTIONAL_ACTIVITY	REACTOME_DOWNREGULATION_OF_SMAD2_3_SMAD4_TRANSCRIPTIONAL_ACTIVITY		23	0.495494	1.70783	0.013369	0.0180407	0.92	4684	tags=43%, list=19%, signal=54%
REACTOME_BETA_CATENIN_INDEPENDENT_WNT_SIGNALING	REACTOME_BETA_CATENIN_INDEPENDENT_WNT_SIGNALING		130	0.341614	1.70776	0	0.0179932	0.92	3608	tags=28%, list=15%, signal=33%
REACTOME_DECTIN_1_MEDIATED_NONCANONICAL_NF_KB_SIGNALING	REACTOME_DECTIN_1_MEDIATED_NONCANONICAL_NF_KB_SIGNALING		58	0.393914	1.70769	0.00285714	0.0179524	0.92	3608	tags=36%, list=15%, signal=42%
REACTOME_RHO_GTPASE_EFFECTORS	REACTOME_RHO_GTPASE_EFFECTORS		233	0.31099	1.7052	0	0.0182642	0.926	4774	tags=32%, list=20%, signal=40%
REACTOME_BINDING_AND_UPTAKE_OF_LIGANDS_BY_SCAVENGER_RECEPTORS	REACTOME_BINDING_AND_UPTAKE_OF_LIGANDS_BY_SCAVENGER_RECEPTORS		89	0.356063	1.70406	0	0.0183592	0.929	4036	tags=20%, list=17%, signal=24%
[truncated: 638 more rows]
